# Supplementary material for: The Antimicrobial Peptide AMP-17 Derived from Musca domestica Inhibits Biofilm Formation and Eradicates Mature Biofilm in Candida albicans
Source: MDPI journal article supplement (doi:10.3390/antibiotics11111474), 2022-10-25
Supplement: s1 [file s1]

**Table S1.** Important genes in AMP-17 treated *C.albicans* biofilms compared to their expression in untreated *C.albicans* cells identified by RNA-seq.

| Function and standard or systematic name in CGD <sup>(x)</sup> | Log2FC in expression <sup>(a)</sup> | Log2FC in expression <sup>(b)</sup> | Description <sup>(x)</sup>                                                                             |
|----------------------------------------------------------------|-------------------------------------|-------------------------------------|--------------------------------------------------------------------------------------------------------|
| <b>adhesion</b>                                                |                                     |                                     |                                                                                                        |
| MCM1                                                           | -2.15                               | -0.81                               | Transcription factor; regulator of hyphal growth; may act with Wor1p;                                  |
| TRY5                                                           | -2.30                               | -1.30                               | regulator of yeast form adherence; required for yeast cell adherence;                                  |
| ALS3                                                           | -5.35                               | -0.81                               | Cell wall adhesin; involved in epithelial adhesion and endothelial invasion                            |
| HWP1                                                           | -6.24                               | -3.38                               | Hyphal cell wall protein; host transglutaminase substrate;                                             |
| SAP5                                                           | -3.79                               | -4.20                               | Biofilm-specific aspartyl protease; virulence role effected by URA3; biofilm induced;                  |
| <b>Filamentation</b>                                           |                                     |                                     |                                                                                                        |
| ECE1                                                           | -7.29                               | -2.94                               | Candidalysin; cytolytic peptide toxin essential for mucosal infection; hypha-specific                  |
| EFG1                                                           | -2.93                               | -2.13                               | Transcription factor; required for white-phase cell type and hyphal growth                             |
| TEC1                                                           | -3.97                               | -2.23                               | TEA/ATTS transcription factor; white cell pheromone response and hyphal regulation;                    |
| UME6                                                           | -4.49                               | -1.23                               | Zn(II)2Cys6 transcription factor; controls transition to filamentous growth                            |
| RFG1                                                           | -3.51                               | -0.76                               | HMG domain transcriptional repressor of filamentous growth and hyphal genes;                           |
| YWP1                                                           | 6.87                                | -0.45                               | Secreted yeast-cell wall protein; involved in adhesion and biofilm formation;                          |
| NRG1                                                           | 1.75                                | -0.26                               | Transcription factor/repressor; regulates chlamydospore formation/hyphal gene;                         |
| HGC1                                                           | -1.02                               | -1.92                               | Hypha-specific G1 cyclin-related protein, morphogenesis, biofilm formation;                            |
| GAL10                                                          | 1.13                                | 2.07                                | UDP-glucose 4-epimerase; galactose utilization; cell wall and filamentation;                           |
| STP4                                                           | 2.91                                | 0.46                                | C <sub>2</sub> H <sub>2</sub> transcription factor; colony morphology-related gene regulation by Ssn6; |
| PCL5                                                           | 3.62                                | 1.70                                | Putative cyclin for Pho85 kinase; Gcn4-induced; rat catheter and Spider biofilm induced                |
| ROB1                                                           | -1.26                               | -2.03                               | Zn(II)2Cys6 transcription factor; biofilm formation; colony morphology; biofilm induced;               |
| <b>MAPK Pathway</b>                                            |                                     |                                     |                                                                                                        |
| CLA4                                                           | -2.53                               | -0.91                               | Ste20p family Ser/Thr kinase required for wild-type filamentous growth;                                |
| CDC28                                                          | -0.62                               | -1.05                               | Cyclin-dependent protein kinase; determination of cell morphology; phosphorylation;                    |
| PTP2                                                           | 2.99                                | 2.03                                | Predicted protein tyrosine phosphatase; regulation of MAP kinase Hog1 activity;                        |
| CEK2                                                           | 1.77                                | -2.06                               | MAP kinase required for wild-type efficiency of mating; roles in filamentous growth;                   |
| HOG1                                                           | -1.06                               | -0.33                               | MAPK phosphatase activity involved in regulation of osmosensory signaling pathway;                     |
| CEK1                                                           | -1.16                               | -0.69                               | ERK-family protein kinase; required for wild-type yeast-hypha switch, MAPK pathway;                    |
| CPH1                                                           | -1.75                               | 1.44                                | Transcription factor; required for mating, filamentation; pheromone-stimulated biofilms                |

| Function and standard or systematic name in CGD <sup>(x)</sup> | Log2FC in expression <sup>(a)</sup> | Log2FC in expression <sup>(b)</sup> | Description <sup>(x)</sup>                                                              |
|----------------------------------------------------------------|-------------------------------------|-------------------------------------|-----------------------------------------------------------------------------------------|
| CCP1                                                           | -1.85                               | -1.02                               | Cytochrome-c peroxidase N terminus;                                                     |
| WOR2                                                           | -4.32                               | -2.78                               | Zn(II)2Cys6 transcription factor; regulator of white-opaque switching;                  |
| <b>carboxylic acid metabolic</b>                               |                                     |                                     |                                                                                         |
| CAR2                                                           | -3.83                               | -2.06                               | Ornithine aminotransferase; arginine metabolism; biofilm induced;                       |
| MET3                                                           | -3.32                               | -3.60                               | ATP sulfurlyase; sulfate assimilation; biofilm formation;                               |
| ARO10                                                          | -2.48                               | -3.42                               | Aromatic decarboxylase; aromatic alcohol biosynthesis; Spider biofilm induced           |
| CAT2                                                           | -1.79                               | -1.63                               | Major carnitine acetyl transferase; intracellular acetyl-CoA transport; Hog1-repressed; |
| PXP2                                                           | -1.55                               | -2.13                               | Putative acyl-CoA oxidase; enzyme of fatty acid beta-oxidation; biofilm induced;        |
| IFD6                                                           | 2.94                                | 3.17                                | Aldo-keto reductase; similar to aryl alcohol dehydrogenases; biofilm induced;           |
| ACH1                                                           | -1.15                               | 1.41                                | Acetyl-coA hydrolase; soluble protein in hyphae; induced on polystyrene adherence;      |
| IDP1                                                           | 1.78                                | 1.94                                | Putative isocitrate dehydrogenase; alkaline induced; Spider biofilm repressed;          |
| ADH5                                                           | 2.35                                | -0.64                               | Putative alcohol dehydrogenase; regulated by Nrg1, Tup1; biofilm induced;               |
| <b>metal ion transport</b>                                     |                                     |                                     |                                                                                         |
| CTR1                                                           | -2.88                               | -3.29                               | Copper transporter; transcribed in low copper; biofilm induced                          |
| CFL1                                                           | -2.67                               | -2.23                               | Protein similar to ferric reductase Fre10p; negatively regulated by Sfu1p, copper;      |
| CFL2                                                           | -3.63                               | -2.01                               | Oxidoreductase; iron utilization; biofilm induced;                                      |
| FRE30                                                          | -3.75                               | -1.95                               | Protein with similarity to ferric reductases;                                           |
| FRE7                                                           | -3.86                               | -1.84                               | Copper-regulated cupric reductase; Spider biofilm induced                               |
| CRP1                                                           | 1.86                                | 3.20                                | Copper transporter; CPx P1-type ATPase; mediates Cu resistance; biofilm induced         |
| <b>Ergosterol biosynthesis</b>                                 |                                     |                                     |                                                                                         |
| ERG1                                                           | 2.27                                | 0.40                                | Squalene epoxidase, ergosterol biosynthesis; allylamine antifungal drug target;         |
| ERG4                                                           | 2.62                                | 0.64                                | sterol C-24 reductase; Mob2p-dependent hyphal regulation; fluconazole-induced;          |
| ERG6                                                           | 2.40                                | -0.25                               | Delta(24)-sterol C-methyltransferase, fecosterol conversion, ergosterol biosynthesis;   |
| ERG27                                                          | 3.07                                | 1.02                                | 3-Keto sterol reductase of ergosterol biosynthesis; acts in C-4 sterol demethylation;   |
| ERG251                                                         | 2.54                                | 0.001                               | C-4 sterol methyl oxidase; role in ergosterol biosynthesis;                             |

<sup>x</sup> As reported in the CGD database (<http://www.candidagenome.org/>); <sup>(a)</sup> indicated the comparison between AMP-17 treated samples and the control ones in biofilm forming stage. <sup>(b)</sup> indicated the comparison between AMP-17 treated preformed biofilms and the control samples.

**Table S2. Primer design for qRT-PCR**

| Gene name | Foward primer (5' to 3')    | Reverse primer (5' to 3')   |
|-----------|-----------------------------|-----------------------------|
| ACT1      | ACCGAAGCTCCAATGAATCC        | CCGGTGGTTCTACCAGAAGAG       |
| ALS3      | CCATTTCGATCCTAACCGCGA       | TGGTGCAGTTTTGGTCAGGT        |
| HWP1      | GCTGGCTCAAGTGGTGCTAT        | TGGCAGATGGTTGCATGAGT        |
| SAP5      | AGGGGACGAAATGTTGATGCT       | TCATTTGAGCACCTATGGCA        |
| TRY5      | CCCTAGTACGTTGCCATCCA        | CTTACAGCAGGGTTCGGGTT        |
| ECE1      | CCATCATCCACCATGCTCCA        | ACAGTAGGTGCTTGGTCAGC        |
| UME6      | ACTGCTACTGGATCTGGAGTTGGG    | GGTTGGGATTGTGCTTGTGTTGAG    |
| RFG1      | AACAGCAACAGCAGCAACAACAAG    | ACCTCCACCTCCACCTCCATTAAG    |
| EFG1      | CCGTTGCTGCTGCTACTACTACTG    | CACCAGACACATTACTGCCACCAC    |
| TEC1      | GCCATGATGTGTACGACCAAGGAG    | GTTGTTGTTGTTGTTGTTGTTGCTGTG |
| YWP1      | GCTTCTCCATCTGGTTCCGAATCC    | CAGTAGCAGTAGCGGCAGAATCAC    |
| NRG1      | ACCAACACCACCACCATATCCAATG   | ATGGTATGGCTGAGGTTGTTGTAGTG  |
| PCL5      | CAAAGACGAACAACCAACCCTCTTG   | AGGCTTTAACCTTCTTGGCAACTGG   |
| HOG1      | GGCATACCATGATCCAACCGATGAG   | GCCACACCAACAGTTTGATGAAAGTC  |
| CCP1      | AAGTCCCTGAAGGTAAAAGTGCTAGTG | CCTGATGTATGCCATGCCAATCTTAAC |
| CPH1      | AAGGACTCCACTACCCCCAA        | CACAAACCCGGCATTAGCAG        |
| CEK1      | CTCAAGCACAACAACAACAACAAC    | TGACGAGGGGAAGAAGAAGTAGTAGC  |
| WOR2      | GCCCTCATCACATTTACGCC        | AAACACGTTGGTTTCCGCTC        |
| STP4      | TTCGTGCAATTCACCCACACCTTC    | AGGAAGCCGGTCTATCGTTACTCG    |
| ADH5      | CACGAAATTGCTGGGACTGTTGC     | CCGACACAAGCGACACGATCTC      |
| IFD6      | TGGTGTCTTGTGTCTGTCATTTCG    | GCTTCACGAGGTTACCCCAATCC     |
| CSH1      | ACCGTGAGGACGAGAGAGAA        | GACACAAAACACCACCACCG        |
| GSC1      | CAGCTTGGTCTGCTGATCCT        | CCTGAGCTGGTGACATACGG        |
| ALG11     | TTCCGTCTGAAAAGCGTCA         | TCAGCCGTTTCGACAAGATCC       |
| MNN4      | GCAATCGTCAAAACCAAGTGGA      | AAGAATCGTGATGGGCGGTT        |
| ROB1      | TGAAGCCTCGTTGGCGAAT         | AAGGTGGACGTGAAAGTTTGC       |
| BRG1      | TCGCCACATTGCCTCCTTTGATG     | GTGTTGCTGTTGTTGTTGTTGTTGTTG |
| PES1      | TGCCTGCAACAGACAAGGTT        | TGTCCCTTAACAGTGGCTTGG       |
| SET3      | CCATCTCCCACACCAGCATT        | CAGGAACCACTTGAGCCCTT        |

**Table S3 RNA-seq data summary**

| Sample     | Total Raw<br>Reads (M) | Total Clean<br>Reads (M) | Total Clean<br>Bases(Gb) | Clean Reads<br>Q20(%) | Clean Reads<br>Q30(%) | Clean Reads<br>Ratio(%) |
|------------|------------------------|--------------------------|--------------------------|-----------------------|-----------------------|-------------------------|
| AMP-17(a)  | 47.33                  | 42.09                    | 6.31                     | 96.84                 | 92.2                  | 88.93                   |
|            | 47.33                  | 42.41                    | 6.36                     | 96.97                 | 92.55                 | 89.61                   |
|            | 47.33                  | 42                       | 6.3                      | 96.9                  | 92.38                 | 88.76                   |
| Control(a) | 47.33                  | 42.91                    | 6.44                     | 96.84                 | 92.25                 | 90.68                   |
|            | 49.08                  | 42.45                    | 6.37                     | 96.87                 | 92.34                 | 86.48                   |
|            | 47.33                  | 42.65                    | 6.4                      | 96.83                 | 92.24                 | 90.12                   |
|            | 45.57                  | 44.43                    | 6.66                     | 97.35                 | 93.15                 | 97.49                   |
| AMP-17(b)  | 47.33                  | 43.3                     | 6.49                     | 97                    | 92.68                 | 91.49                   |
|            | 43.82                  | 42.77                    | 6.42                     | 97.17                 | 92.88                 | 97.61                   |
|            | 43.82                  | 42.85                    | 6.43                     | 97.28                 | 93.09                 | 97.79                   |
| Control(b) | 43.82                  | 42.88                    | 6.43                     | 97.16                 | 92.85                 | 97.85                   |
|            | 43.82                  | 42.83                    | 6.42                     | 97.2                  | 92.91                 | 97.74                   |

- (a) Samples are collected in early biofilm stage, cells ( $1 \times 10^6$  CFU/mL) co-incubated with or without 32  $\mu\text{g/mL}$  AMP-17 at 37°C for 12h.
- (b) Samples are collected in mature biofilm, cells ( $1 \times 10^6$  CFU/mL) incubated at 37°C for 12h to grow mature, followed co-incubated with or without 128  $\mu\text{g/mL}$  AMP-17 for 12h.
