# Supplementary material for: The Antimicrobial Peptide AMP-17 Derived from Musca domestica Inhibits Biofilm Formation and Eradicates Mature Biofilm in Candida albicans
Source: MDPI journal article supplement (doi:10.3390/antibiotics11111474), 2022-10-25
Supplement: s1 [file s1]

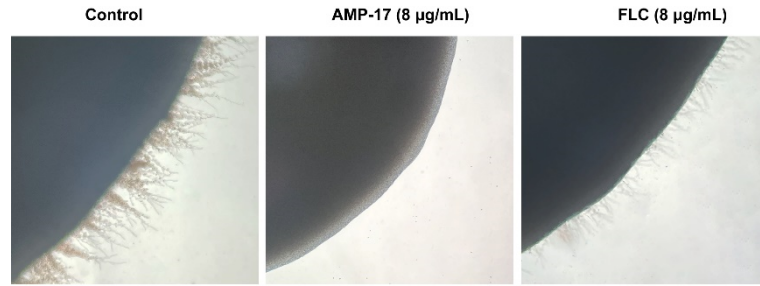

**Figure S1.** Effects of 8µg/mL of AMP-17 and FLC on colony morphology on solid Spider medium.

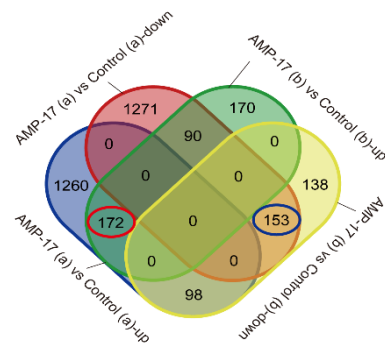

**Figure S2.** Venn Diagram map of DEGs between 32µg/mL AMP-17 treated early forming biofilm and 128 µg/mL AMP-17 treated preformed biofilm. “a” in the above figure indicated early forming biofilm (12h), while “b” indicated preformed biofilm.

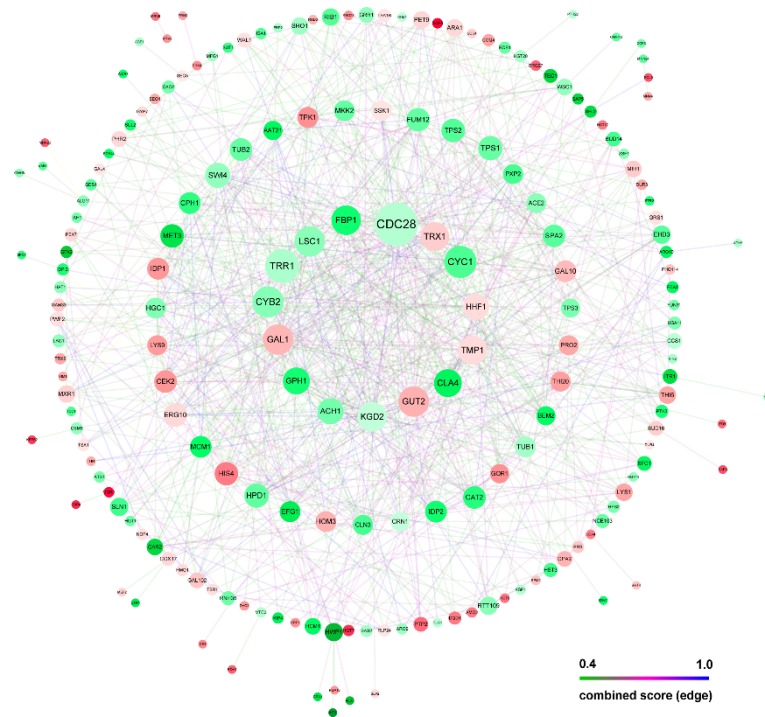

**Figure S3.** The structure of the gene-gene interaction network based on PPI analysis and degree computation of 380 essential genes. Up-regulated genes were colored in red, and down-regulated genes were colored in green. The 15 hub genes were shown in the center of the network. Hub genes were defined as genes with a degree higher than 20. Nodes represent genes and edges show the interaction with other genes, and the size of the nodes is illustrated in descending order of degree centrality, with a bigger size means the node being more “central”.

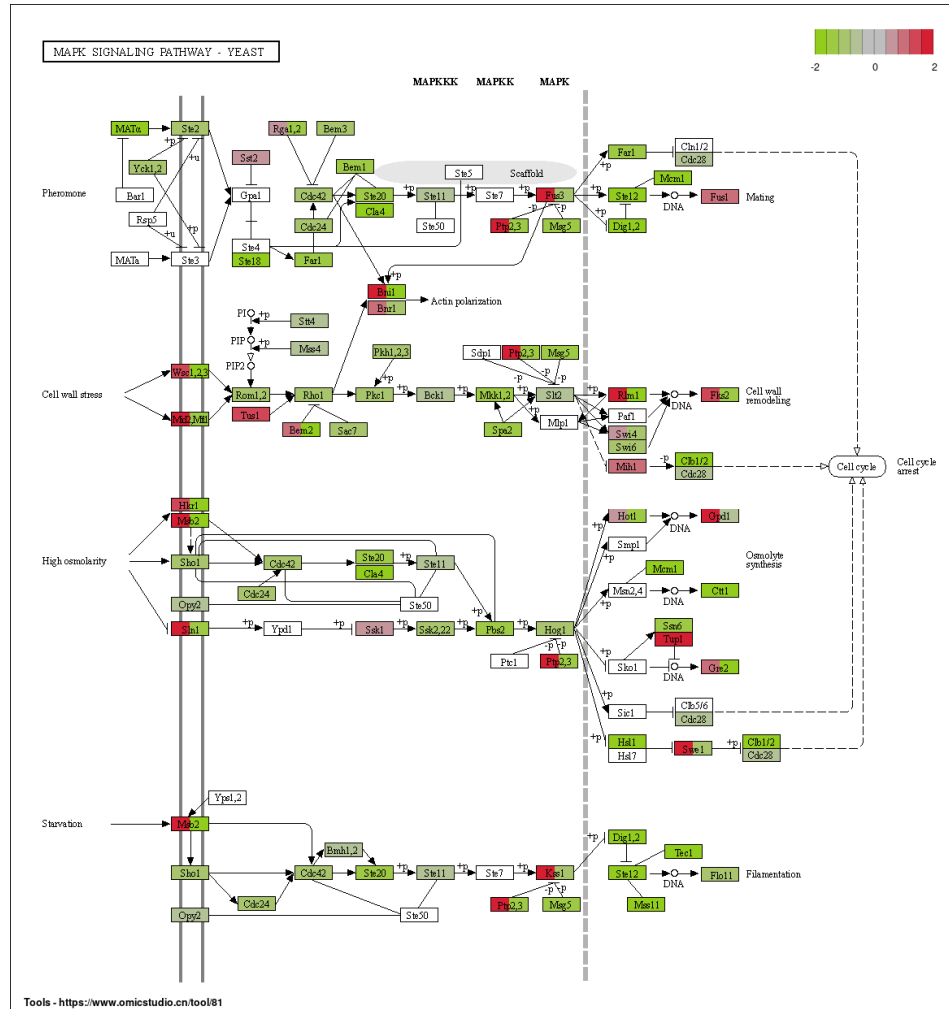

**Figure S4.** The MAPK map of DEGs identified by RNA-seq in the pairwise comparison of 32µg/mL AMP-17 vs Control in the biofilm forming phase. The color of DEGs from green to red denoted log<sub>2</sub>(fold change) of genes ascending gradually from -2 to 2.
