# Supplementary material for: The Antimicrobial Peptide AMP-17 Derived from Musca domestica Inhibits Biofilm Formation and Eradicates Mature Biofilm in Candida albicans
Source: Antibiotics (Basel). 2022 Oct 25;11(11):1474. doi: 10.3390/antibiotics11111474 (PMC9686669; doi:10.3390/antibiotics11111474)
Supplement: Supplementary file 1 [file antibiotics-11-01474-s001.zip]

Archive with 5 entries (5 files):
- Figure S1-S4.pdf
- Table S1-S3.pdf
- Talble S4. the DEGs of AMP-17 treated forming biofilms by RNA-seq.xlsx
- Talble S5. the DEGs of AMP-17 treated preformed biofilms by RNA-seq.xlsx
- Talble S6. the DEGs drived from geen network using Clugo of cytoscape.xlsx
