# Supplementary material for: The Antimicrobial Peptide AMP-17 Derived from Musca domestica Inhibits Biofilm Formation and Eradicates Mature Biofilm in Candida albicans
Source: Antibiotics (Basel). 2022 Oct 25;11(11):1474. doi: 10.3390/antibiotics11111474 (PMC9686669; doi:10.3390/antibiotics11111474)
Supplement: Supplementary file 1 [file antibiotics-11-01474-s001.zip › Talble S4. the DEGs of AMP-17 treated forming biofilms by RNA-seq.xlsx]

## Sheet: Sheet1
gene_id	gene_id_alias	gene_transcript_id	gene_type	gene_transcript_num	gene_start	gene_end	gene_chr	gene_strand	gene_len	gene_max_transcript_len	fpkm_A1_1A	fpkm_A1_2A	fpkm_A1_3A	fpkm_C1_1A	fpkm_C1_2A	fpkm_C1_3A	average_fpkm_A1	average_fpkm_C1	diffexp_log2fc_C1-vs-A1	diffexp_deseq2_qvalue_C1-vs-A1	diffexp_pvalue_C1-vs-A1	diffexp_log2fc_C1_1A-vs-A1_1A	diffexp_possiondis_fdr_C1_1A-vs-A1_1A	diffexp_pvalue_C1_1A-vs-A1_1A	diffexp_log2fc_C1_2A-vs-A1_2A	diffexp_possiondis_fdr_C1_2A-vs-A1_2A	diffexp_pvalue_C1_2A-vs-A1_2A	diffexp_log2fc_C1_3A-vs-A1_3A	diffexp_possiondis_fdr_C1_3A-vs-A1_3A	diffexp_pvalue_C1_3A-vs-A1_3A	desc_kegg	desc_nr	desc_go
3645875	3645875	XM_707419.2	Known_gene	1	479401	481050	NC_032094.1	+	1650	1650	27.23	13.02	12.84	95.32	81.42	75.29	17.696	84.01	-2.19017	4.01649e-11	3.97441e-12	-1.80758	4.02561e-200	4.08998e-201	-2.64465	4.22533e-277	4.0597e-278	-2.55181	5.74554e-244	5.77234e-245	K11365//SAGA-associated factor 73	XP_712512.2|0.0e+00|deubiquitination module subunit [Candida albicans SC5314]	NA
3643108	3643108	XM_710148.1	Known_gene	1	857114	859144	NC_032095.1	-	2031	2031	157.04	139.72	148.39	347.62	385.38	275.25	148.383	336.083	-1.18128	1.36138e-08	1.87464e-09	-1.14638	0	0	-1.46374	0	0	-0.891349	3.5134e-242	3.59418e-243	K19877//chitin biosynthesis protein CHS5;K22493//agglutinin-like protein	XP_715241.1|0.0e+00|hypothetical protein CAALFM_C703890CA [Candida albicans SC5314]	GO:0031224//intrinsic component of membrane;GO:0016021//integral component of membrane;GO:0110165//cellular anatomical entity;GO:0016020//membrane;
3638430	3638430	XM_714772.1	Known_gene	1	1673212	1675362	NC_032091.1	+	2151	2151	120.03	104.13	108.77	116.65	99.47	109.99	110.976	108.703	0.0165416	0.947787	0.922252	0.0412087	0.2754	0.248842	0.0660524	0.0829437	0.0709622	-0.0160917	0.62452	0.595698	NA	XP_719865.1|0.0e+00|hypothetical protein CAALFM_C307290WA [Candida albicans SC5314]	GO:0110165//cellular anatomical entity;GO:0005622//intracellular;GO:0005737//cytoplasm;
3640308	3640308	XM_712995.2	Known_gene	1	815053	816966	NC_032094.1	-	1914	1914	188.56	123.79	104.47	84.91	102.49	99.77	138.94	95.723	0.526244	0.0736116	0.0395174	1.15102	1.24005e-236	1.08639e-237	0.272412	3.41166e-13	1.79603e-13	0.0664107	0.119754	0.103174	K15072//SCF-associated factor 1	XP_718088.2|0.0e+00|SCF ubiquitin ligase complex subunit [Candida albicans SC5314]	GO:0050794//regulation of cellular process;GO:0050896//response to stimulus;GO:0007154//cell communication;GO:0051493//regulation of cytoskeleton organization;GO:0007265//Ras protein signal transduction;GO:0051716//cellular response to stimulus;GO:0033043//regulation of organelle organization;GO:0007088//regulation of mitotic nuclear division;GO:0065007//biological regulation;GO:0070507//regulati…
3637884	3637884	XM_715427.1	Known_gene	1	462582	463040	NC_032092.1	-	459	459	39.32	35.08	36.13	31.08	32.63	38.66	36.843	34.123	0.092674	0.738074	0.656816	0.339277	0.0435063	0.0358978	0.10445	0.541165	0.513362	-0.0976444	0.482212	0.450156	NA	XP_720520.1|1.5e-82|hypothetical protein CAALFM_C402330CA [Candida albicans SC5314]	GO:0031224//intrinsic component of membrane;GO:0016021//integral component of membrane;GO:0016020//membrane;GO:0110165//cellular anatomical entity;
3634895	DAK2	XM_718370.1	Known_gene	1	2017549	2019336	NC_032089.1	-	1788	1788	40.23	62.74	67.94	26.81	22.13	31.93	56.97	26.956	1.04628	8.69239e-05	2.2002e-05	0.585501	5.33831e-16	2.45132e-16	1.50338	6.81021e-112	1.27684e-112	1.08935	3.1592e-73	7.13214e-74	K00863//triose/dihydroxyacetone kinase / FAD-AMP lyase (cyclizing) [EC:2.7.1.28 2.7.1.29 4.6.1.15]+ko01100//Metabolic pathways+ko00051//Fructose and mannose metabolism+ko00680//Methane metabolism+ko01200//Carbon metabolism+ko00561//Glycerolipid metabolism	XP_723463.1|0.0e+00|dihydroxyacetone kinase [Candida albicans SC5314]	GO:0009056//catabolic process;GO:0019563//glycerol catabolic process;GO:0044262//cellular carbohydrate metabolic process;GO:0044281//small molecule metabolic process;GO:0044275//cellular carbohydrate catabolic process;GO:1901615//organic hydroxy compound metabolic process;GO:0046174//polyol catabolic process;GO:0046164//alcohol catabolic process;GO:0019405//alditol catabolic process;GO:0044237//c…
3642947	NOP1	XM_710354.1	Known_gene	1	1497789	1498739	NC_032092.1	+	951	951	2127.85	2102.82	1929.23	1545.53	1562.69	1435.6	2053.3	1514.61	0.423316	0.020392	0.0093295	0.461295	8.05983e-245	6.80602e-246	0.428294	4.90579e-216	5.74456e-217	0.426371	1.24952e-190	1.52807e-191	K14563//rRNA 2'-O-methyltransferase fibrillarin [EC:2.1.1.-]+ko03008//Ribosome biogenesis in eukaryotes	XP_715447.1|5.6e-180|rRNA methyltransferase [Candida albicans SC5314]	GO:0043628//ncRNA 3'-end processing;GO:2001141//regulation of RNA biosynthetic process;GO:0010468//regulation of gene expression;GO:0006996//organelle organization;GO:0031123//RNA 3'-end processing;GO:0034963//box C/D snoRNA processing;GO:0018364//peptidyl-glutamine methylation;GO:0071840//cellular component organization or biogenesis;GO:0060255//regulation of macromolecule metabolic process;GO:0…
3636156	3636156	XM_717041.1	Known_gene	1	2813599	2815155	NC_032089.1	-	1557	1557	2.73	4.72	5.29	2.07	2.45	2.32	4.246	2.28	0.853212	0.0190606	0.00861895	0.39927	0.192022	0.169314	0.946005	0.000109137	7.757e-05	1.18914	7.30003e-07	4.59384e-07	K08150//MFS transporter, SP family, solute carrier family 2 (myo-inositol transporter), member 13	XP_722134.1|8.6e-295|hypothetical protein CAALFM_C112930CA [Candida albicans SC5314]	GO:0051179//localization;GO:1904659//glucose transmembrane transport;GO:0008643//carbohydrate transport;GO:0009987//cellular process;GO:0006810//transport;GO:0055085//transmembrane transport;GO:0034219//carbohydrate transmembrane transport;GO:0071702//organic substance transport;GO:0046323//glucose import;GO:0051234//establishment of localization;GO:0008645//hexose transmembrane transport;GO:0015…
3638392	ECM14	XM_714902.2	Known_gene	1	639619	641031	NC_032091.1	-	1413	1413	43.57	48.58	58.93	121.74	115.96	123.18	50.36	120.293	-1.26453	4.35094e-13	3.55282e-14	-1.4824	6.73703e-163	7.97806e-164	-1.25519	1.78388e-121	3.16308e-122	-1.06369	5.30772e-99	1.00813e-99	K08783//extracellular matrix protein 14 [EC:3.4.17.-]	XP_719995.2|8.3e-281|putative metallocarboxypeptidase [Candida albicans SC5314]	GO:0019538//protein metabolic process;GO:0008152//metabolic process;GO:0006508//proteolysis;GO:1901564//organonitrogen compound metabolic process;GO:0071704//organic substance metabolic process;GO:0006807//nitrogen compound metabolic process;GO:0043170//macromolecule metabolic process;GO:0044238//primary metabolic process;GO:0110165//cellular anatomical entity;GO:0005576//extracellular region;GO:…
3639557	3639557	XM_713765.2	Known_gene	1	1361000	1363132	NC_032089.1	-	2133	2133	85.51	68.68	72.46	106.24	100.07	91.38	75.55	99.23	-0.403318	0.0552457	0.0284084	-0.313162	2.57596e-16	1.17042e-16	-0.543048	3.06953e-40	1.00867e-40	-0.334694	5.6808e-16	2.6918e-16	K12196//vacuolar protein-sorting-associated protein 4+ko04144//Endocytosis;K14563//rRNA 2'-O-methyltransferase fibrillarin [EC:2.1.1.-]+ko03008//Ribosome biogenesis in eukaryotes	XP_718858.2|0.0e+00|hypothetical protein CAALFM_C106400CA [Candida albicans SC5314]	GO:0005634//nucleus;GO:0005622//intracellular;GO:0043229//intracellular organelle;GO:0043231//intracellular membrane-bounded organelle;GO:0043226//organelle;GO:0043227//membrane-bounded organelle;GO:0110165//cellular anatomical entity;
3643802	3643802	XM_709450.2	Known_gene	1	2003065	2004369	NC_032090.1	-	1305	1305	46.96	40.26	41.93	32.98	38.53	42.53	43.05	38.013	0.170639	0.425634	0.327596	0.509841	1.05127e-10	5.59778e-11	0.063365	0.441495	0.412258	-0.020498	0.765014	0.741944	K01190//beta-galactosidase [EC:3.2.1.23]+ko00600//Sphingolipid metabolism+ko00511//Other glycan degradation+ko01100//Metabolic pathways+ko00052//Galactose metabolism	XP_714543.2|3.5e-249|hypothetical protein CAALFM_C209810CA [Candida albicans SC5314]	GO:0016787//hydrolase activity;GO:0016810//hydrolase activity, acting on carbon-nitrogen (but not peptide) bonds;GO:0016813//hydrolase activity, acting on carbon-nitrogen (but not peptide) bonds, in linear amidines;GO:0003824//catalytic activity;
3636978	CYP1	XM_716220.2	Known_gene	1	519130	519618	NC_032095.1	-	489	489	1743.58	1807.75	2257.98	313.32	460.29	631.08	1936.44	468.23	1.99918	6.91627e-15	4.49736e-16	2.47634	0	0	1.97358	0	0	1.83914	0	0	K01802//peptidylprolyl isomerase [EC:5.2.1.8]	XP_721313.1|1.4e-89|peptidylprolyl isomerase [Candida albicans SC5314]	GO:0044238//primary metabolic process;GO:0048869//cellular developmental process;GO:0098732//macromolecule deacylation;GO:0051276//chromosome organization;GO:0048468//cell development;GO:0009653//anatomical structure morphogenesis;GO:0043935//sexual sporulation resulting in formation of a cellular spore;GO:0048522//positive regulation of cellular process;GO:0016570//histone modification;GO:003043…
3636599	3636599	XM_716637.1	Known_gene	1	428436	429026	NC_032091.1	-	591	591	176.74	169.72	229.13	56.6	42.69	44.47	191.863	47.92	1.94454	1.22342e-18	5.53418e-20	1.64275	3.91877e-98	6.70316e-99	1.99119	2.71021e-123	4.74682e-124	2.36526	3.17641e-205	3.67282e-206	NA	XP_721730.1|8.2e-113|hypothetical protein CAALFM_C301950CA [Candida albicans SC5314]	GO:0031224//intrinsic component of membrane;GO:0110165//cellular anatomical entity;GO:0016020//membrane;GO:0016021//integral component of membrane;
3636485	3636485	XM_716741.2	Known_gene	1	966890	968029	NC_032093.1	-	1140	1140	2.03	1.24	1.48	0.83	2.03	3.14	1.583	2	-0.303498	0.633141	0.537322	1.2903	0.00699248	0.00540042	-0.71114	0.10616	0.0916216	-1.08517	0.00325464	0.00248734	K01956//carbamoyl-phosphate synthase small subunit [EC:6.3.5.5]+ko00250//Alanine, aspartate and glutamate metabolism+ko01100//Metabolic pathways+ko00240//Pyrimidine metabolism	XP_721834.2|7.6e-224|hypothetical protein CAALFM_C504380CA [Candida albicans SC5314]	NA
3639360	TUF1	XM_713916.1	Known_gene	1	95214	96494	NC_032089.1	+	1281	1281	463.09	475.69	866.43	445.9	552.56	527.32	601.736	508.593	0.212166	0.487775	0.38824	0.0545724	0.0326056	0.0266536	-0.216109	3.06093e-23	1.28513e-23	0.716404	0	0	K02358//elongation factor Tu	XP_719009.1|9.7e-244|translation elongation factor Tu [Candida albicans SC5314]	GO:0034645//cellular macromolecule biosynthetic process;GO:0006518//peptide metabolic process;GO:0009059//macromolecule biosynthetic process;GO:0044260//cellular macromolecule metabolic process;GO:0008152//metabolic process;GO:0032543//mitochondrial translation;GO:1901576//organic substance biosynthetic process;GO:0043603//cellular amide metabolic process;GO:0034641//cellular nitrogen compound me…
3645221	3645221	XM_708036.1	Known_gene	1	1538564	1539199	NC_032090.1	+	636	636	435.64	356.88	471.23	448.07	566.11	543.03	421.25	519.07	-0.316098	0.100577	0.0570212	-0.0405877	0.187628	0.165315	-0.665643	1.76178e-80	3.982e-81	-0.204601	1.20374e-10	6.57624e-11	K03964//NADH dehydrogenase (ubiquinone) 1 beta subcomplex subunit 8+ko01100//Metabolic pathways+ko00190//Oxidative phosphorylation	XP_713129.1|3.1e-118|hypothetical protein CAALFM_C207550WA [Candida albicans SC5314]	GO:0043227//membrane-bounded organelle;GO:0005622//intracellular;GO:0043226//organelle;GO:0016020//membrane;GO:0043231//intracellular membrane-bounded organelle;GO:0005739//mitochondrion;GO:0031224//intrinsic component of membrane;GO:0016021//integral component of membrane;GO:0005737//cytoplasm;GO:0071944//cell periphery;GO:0110165//cellular anatomical entity;GO:0005886//plasma membrane;GO:004322…
3647450	3647450	XM_705850.1	Known_gene	1	1781343	1782407	NC_032091.1	-	1065	1065	89.98	53.09	64.84	50.01	66.41	65.86	69.303	60.76	0.178508	0.55656	0.457152	0.847388	1.65699e-36	5.16086e-37	-0.32296	6.67483e-06	4.48032e-06	-0.0225184	0.705112	0.677622	K16330//pseudouridylate synthase / pseudouridine kinase [EC:4.2.1.70 2.7.1.83]+ko00240//Pyrimidine metabolism;K16329//pseudouridylate synthase [EC:4.2.1.70]+ko00240//Pyrimidine metabolism	XP_710942.1|4.5e-202|hypothetical protein CAALFM_C307900CA [Candida albicans SC5314]	NA
3638302	3638302	XM_714959.2	Known_gene	1	761498	762349	NC_032091.1	+	852	852	163.62	136.33	180.16	104.51	159.07	144.78	160.036	136.12	0.217941	0.369641	0.274172	0.646708	6.69314e-32	2.23848e-32	-0.222559	1.81903e-05	1.24465e-05	0.315416	4.78048e-10	2.66582e-10	K17080//prohibitin 1	XP_720052.2|5.4e-150|prohibitin subunit [Candida albicans SC5314]	GO:0071944//cell periphery;GO:0005740//mitochondrial envelope;GO:0005622//intracellular;GO:0005737//cytoplasm;GO:0031090//organelle membrane;GO:0031966//mitochondrial membrane;GO:0005743//mitochondrial inner membrane;GO:0043227//membrane-bounded organelle;GO:0005886//plasma membrane;GO:0110165//cellular anatomical entity;GO:0031975//envelope;GO:0005739//mitochondrion;GO:0016020//membrane;GO:00432…
3648111	3648111	XM_705190.2	Known_gene	1	1017114	1021940	NC_032090.1	-	4827	4827	55.45	65.5	62.36	88.79	80.3	81.68	61.103	83.59	-0.460077	0.0144869	0.00628819	-0.67921	3.48386e-121	5.15848e-122	-0.293905	8.23972e-25	3.37148e-25	-0.389362	1.30371e-41	3.94894e-42	K12879//THO complex subunit 2+ko03040//Spliceosome+ko03013//RNA transport	XP_710282.2|0.0e+00|hypothetical protein CAALFM_C204870CA [Candida albicans SC5314]	GO:0034613//cellular protein localization;GO:0006396//RNA processing;GO:0006139//nucleobase-containing compound metabolic process;GO:0070727//cellular macromolecule localization;GO:0051649//establishment of localization in cell;GO:0010467//gene expression;GO:0016070//RNA metabolic process;GO:0050657//nucleic acid transport;GO:0042886//amide transport;GO:0006403//RNA localization;GO:0015931//nucle…
30515216	30515216	XM_019475335.1	Known_gene	1	1457202	1457699	NC_032091.1	+	498	498	NA	NA	NA	NA	NA	NA	NA	NA	NA	NA	NA	NA	NA	NA	NA	NA	NA	NA	NA	NA	K14842//ribosome biogenesis protein NSA2	KGR10372.1|2.9e-87|ribosome biogenesis protein NSA2 [Candida albicans P78048]	GO:0006396//RNA processing;GO:0006807//nitrogen compound metabolic process;GO:0044085//cellular component biogenesis;GO:0090304//nucleic acid metabolic process;GO:0000470//maturation of LSU-rRNA;GO:0044237//cellular metabolic process;GO:0034641//cellular nitrogen compound metabolic process;GO:0071840//cellular component organization or biogenesis;GO:0042254//ribosome biogenesis;GO:0043170//macrom…
3645105	3645105	XM_708159.2	Known_gene	1	699794	700975	NC_032096.1	+	1182	1182	44.22	38.84	50.74	44.07	56.84	61.3	44.6	54.07	-0.287071	0.18462	0.116765	0.00490213	0.98951	0.988356	-0.549363	3.53826e-13	1.86386e-13	-0.272764	7.64613e-05	5.30592e-05	K06965//protein pelota+ko03015//mRNA surveillance pathway	XP_713252.2|4.0e-220|ribosome dissociation factor [Candida albicans SC5314]	GO:0050789//regulation of biological process;GO:1901564//organonitrogen compound metabolic process;GO:0009057//macromolecule catabolic process;GO:0043170//macromolecule metabolic process;GO:0006493//protein O-linked glycosylation;GO:0016070//RNA metabolic process;GO:0009893//positive regulation of metabolic process;GO:0050794//regulation of cellular process;GO:0006464//cellular protein modificati…
3645744	3645744	XM_707548.2	Known_gene	1	97569	98888	NC_032092.1	-	1320	1320	34.01	26.76	41.52	16.39	22.16	28.65	34.096	22.4	0.583873	0.0335682	0.0162176	1.05314	7.98191e-26	2.96862e-26	0.27212	0.0066968	0.00526696	0.535271	1.76957e-10	9.72052e-11	K17764//maintenance of mitochondrial morphology protein 1+ko04139//Mitophagy - yeast	XP_712641.2|1.3e-246|ERMES complex subunit [Candida albicans SC5314]	GO:0070585//protein localization to mitochondrion;GO:0008104//protein localization;GO:0006810//transport;GO:0006886//intracellular protein transport;GO:0046907//intracellular transport;GO:0006839//mitochondrial transport;GO:0033036//macromolecule localization;GO:0051649//establishment of localization in cell;GO:0000002//mitochondrial genome maintenance;GO:0007006//mitochondrial membrane organizat…
3636194	GCV3	XM_717117.1	Known_gene	1	3008286	3008819	NC_032089.1	-	534	534	402.82	413	605.41	682.2	586.56	639.4	473.743	636.053	-0.450403	0.0493449	0.0250294	-0.760059	2.65885e-99	4.5126e-100	-0.506137	2.5835e-41	8.3689e-42	-0.0788062	0.00728319	0.0056972	K02437//glycine cleavage system H protein+ko01100//Metabolic pathways+ko01130//Biosynthesis of antibiotics+ko01110//Biosynthesis of secondary metabolites+ko00260//Glycine, serine and threonine metabolism+ko01200//Carbon metabolism+ko00630//Glyoxylate and dicarboxylate metabolism	XP_722210.1|5.7e-97|glycine decarboxylase subunit H [Candida albicans SC5314]	GO:1901564//organonitrogen compound metabolic process;GO:0044282//small molecule catabolic process;GO:0009063//cellular amino acid catabolic process;GO:0008152//metabolic process;GO:0009056//catabolic process;GO:1901606//alpha-amino acid catabolic process;GO:0006544//glycine metabolic process;GO:1901565//organonitrogen compound catabolic process;GO:0016054//organic acid catabolic process;GO:00442…
30515205	30515205	XM_019475323.1	Known_gene	1	1023134	1024411	NC_032091.1	-	1278	804	1031.42	1484.6	1668.97	804.59	917.62	822.44	1395	848.216	0.689655	0.00269854	0.000950135	0.358306	3.72446e-61	8.78388e-62	0.694106	7.0439e-299	6.3683e-300	1.02098	0	0	K13199//plasminogen activator inhibitor 1 RNA-binding protein	XP_019330868.1|2.8e-148|hypothetical protein CAALFM_C304810CA [Candida albicans SC5314]	GO:0003723//RNA binding;GO:0005488//binding;GO:0003676//nucleic acid binding;GO:1901363//heterocyclic compound binding;GO:0097159//organic cyclic compound binding;
3642321	3642321	XM_710944.2	Known_gene	1	1598697	1600199	NC_032090.1	+	1503	1503	2.59	1.44	1.39	0.7	0.1	0.28	1.806	0.36	2.03058	0.00152234	0.000506624	1.88753	2.0718e-06	1.30574e-06	3.848	2.06902e-07	1.31665e-07	2.31159	9.69242e-05	6.7679e-05	K00485//dimethylaniline monooxygenase (N-oxide forming) [EC:1.14.13.8]	XP_716037.2|3.3e-291|hypothetical protein CAALFM_C207840WA [Candida albicans SC5314]	GO:0016709//oxidoreductase activity, acting on paired donors, with incorporation or reduction of molecular oxygen, NAD(P)H as one donor, and incorporation of one atom of oxygen;GO:1901265//nucleoside phosphate binding;GO:0016491//oxidoreductase activity;GO:0043168//anion binding;GO:0050660//flavin adenine dinucleotide binding;GO:0004497//monooxygenase activity;GO:0000166//nucleotide binding;GO:00…
3642038	3642038	XM_711222.2	Known_gene	1	2657594	2658760	NC_032089.1	-	1167	1167	24.48	36.8	47.34	15.4	13.59	18.88	36.206	15.956	1.13817	7.03146e-05	1.74237e-05	0.668673	2.41144e-08	1.39168e-08	1.43716	3.31832e-39	1.10039e-39	1.3262	4.59287e-44	1.34832e-44	NA	XP_716315.1|2.3e-220|hypothetical protein CAALFM_C112180CA [Candida albicans SC5314]	NA
3639045	DRS1	XM_714302.1	Known_gene	1	2240734	2242575	NC_032096.1	+	1842	1842	284.21	289.46	316.81	314.66	286.79	300.55	296.826	300.666	-0.0336729	0.869947	0.817573	-0.146836	2.39642e-10	1.2944e-10	0.0133693	0.60082	0.57366	0.0760129	0.00188378	0.00141676	K13181//ATP-dependent RNA helicase DDX27 [EC:3.6.4.13]	XP_719395.1|0.0e+00|putative ATP-dependent RNA helicase [Candida albicans SC5314]	GO:0035690//cellular response to drug;GO:0070887//cellular response to chemical stimulus;GO:0022613//ribonucleoprotein complex biogenesis;GO:0051716//cellular response to stimulus;GO:0009987//cellular process;GO:0044085//cellular component biogenesis;GO:0071840//cellular component organization or biogenesis;GO:0050896//response to stimulus;GO:0042221//response to chemical;GO:0042254//ribosome bio…
3637743	MSW1	XM_715513.1	Known_gene	1	621344	622543	NC_032093.1	+	1200	1200	24.04	23.73	40.34	20.88	24.54	20.11	29.37	21.843	0.392863	0.170254	0.105839	0.203315	0.074872	0.0633494	-0.0484231	0.662081	0.637784	1.0043	2.24242e-25	8.67902e-26	K01867//tryptophanyl-tRNA synthetase [EC:6.1.1.2]+ko00970//Aminoacyl-tRNA biosynthesis	XP_720606.1|7.2e-225|tryptophan--tRNA ligase [Candida albicans SC5314]	GO:0006807//nitrogen compound metabolic process;GO:1901576//organic substance biosynthetic process;GO:0044267//cellular protein metabolic process;GO:0043170//macromolecule metabolic process;GO:0043043//peptide biosynthetic process;GO:0006139//nucleobase-containing compound metabolic process;GO:0006436//tryptophanyl-tRNA aminoacylation;GO:0010467//gene expression;GO:0044238//primary metabolic proc…
3644722	3644722	XM_019475092.1	Known_gene	1	879636	880616	NC_032089.1	+	981	834	230.02	173.03	193.16	141.75	143.28	139.35	198.736	141.46	0.470788	0.0183832	0.00825457	0.698411	2.46445e-49	6.64136e-50	0.272185	8.24221e-08	5.1653e-08	0.471083	6.46378e-21	2.72896e-21	K06691//26S proteasome regulatory subunit N13+ko03050//Proteasome	XP_019330637.1|2.5e-155|proteasome regulatory particle lid subunit [Candida albicans SC5314]	GO:0006508//proteolysis;GO:0008152//metabolic process;GO:0030163//protein catabolic process;GO:0044238//primary metabolic process;GO:0006511//ubiquitin-dependent protein catabolic process;GO:1901565//organonitrogen compound catabolic process;GO:0044260//cellular macromolecule metabolic process;GO:0044265//cellular macromolecule catabolic process;GO:0051603//proteolysis involved in cellular protei…
3638425	SEC13	XM_714918.2	Known_gene	1	674583	675479	NC_032091.1	+	897	897	62.29	69.92	95.58	79.74	103.3	102.11	75.93	95.05	-0.33783	0.15724	0.0962842	-0.356303	7.17462e-07	4.43096e-07	-0.563063	1.03303e-17	4.861e-18	-0.0953435	0.106404	0.0911576	K14004//protein transport protein SEC13+ko04141//Protein processing in endoplasmic reticulum+ko03013//RNA transport	XP_720011.2|6.0e-176|GTPase-activating protein [Candida albicans SC5314]	GO:0019941//modification-dependent protein catabolic process;GO:2001141//regulation of RNA biosynthetic process;GO:0044237//cellular metabolic process;GO:0051028//mRNA transport;GO:0030433//ubiquitin-dependent ERAD pathway;GO:0010033//response to organic substance;GO:0051171//regulation of nitrogen compound metabolic process;GO:0071704//organic substance metabolic process;GO:0010243//response to …
3647483	3647483	XM_705822.1	Known_gene	1	1193133	1194662	NC_032090.1	-	1530	1530	63.78	60.87	57.28	37.5	36.79	44.81	60.643	39.7	0.599099	0.0014148	0.000466346	0.766214	7.46061e-33	2.46036e-33	0.726418	4.65059e-29	1.76172e-29	0.354211	3.26661e-08	1.94135e-08	K14764//protein SHQ1	XP_710914.1|9.6e-299|Hsp90 cochaperone [Candida albicans SC5314]	GO:0044085//cellular component biogenesis;GO:0022613//ribonucleoprotein complex biogenesis;GO:0009987//cellular process;GO:0071840//cellular component organization or biogenesis;GO:0016043//cellular component organization;GO:0065003//protein-containing complex assembly;GO:0034622//cellular protein-containing complex assembly;GO:0000491//small nucleolar ribonucleoprotein complex assembly;GO:002261…
3641775	3641775	XM_711454.2	Known_gene	1	1217919	1218905	NC_032092.1	-	987	987	0.32	0	0	0.08	0.08	0	0.106	0.053	0.377071	0.751444	0.671089	2	0.217043	0.192786	-3	0.529182	0.499788	NA	NA	NA	NA	XP_716547.1|3.9e-176|hypothetical protein CAALFM_C405580CA [Candida albicans SC5314]	NA
3639852	3639852	XM_713424.2	Known_gene	1	193060	194184	NC_032091.1	-	1125	1125	14.72	19.35	26.15	14.43	17.95	17.46	20.073	16.613	0.249299	0.399923	0.302886	0.0287064	0.875168	0.8603	0.10835	0.407402	0.378452	0.582757	6.6022e-07	4.1426e-07	K01802//peptidylprolyl isomerase [EC:5.2.1.8]	XP_718517.2|2.1e-218|peptidylprolyl isomerase [Candida albicans SC5314]	GO:0006457//protein folding;GO:0009987//cellular process;GO:0042026//protein refolding;GO:0005737//cytoplasm;GO:0110165//cellular anatomical entity;GO:0005622//intracellular;GO:0005829//cytosol;GO:0140096//catalytic activity, acting on a protein;GO:0008144//drug binding;GO:0005488//binding;GO:0016859//cis-trans isomerase activity;GO:0051082//unfolded protein binding;GO:0044877//protein-containing…
3637952	YOX1	XM_715218.1	Known_gene	1	205033	206040	NC_032095.1	-	1008	1008	2.96	4.6	5.74	84.37	67.36	44.15	4.433	65.293	-3.78796	5.09837e-30	1.16161e-31	-4.83306	1.41398e-271	1.10688e-272	-3.87219	7.78201e-190	9.8914e-191	-2.94329	3.7512e-97	7.19366e-98	K12411//homeobox protein YOX1/YHP1	XP_720311.1|1.4e-184|Yox1p [Candida albicans SC5314]	GO:0051172//negative regulation of nitrogen compound metabolic process;GO:0060255//regulation of macromolecule metabolic process;GO:1902679//negative regulation of RNA biosynthetic process;GO:1903506//regulation of nucleic acid-templated transcription;GO:0051171//regulation of nitrogen compound metabolic process;GO:0045934//negative regulation of nucleobase-containing compound metabolic process;G…
3645117	3645117	XM_708148.1	Known_gene	1	714284	715111	NC_032096.1	+	828	828	21.52	25.95	24.83	18.01	17.78	18.21	24.1	18	0.402387	0.0800251	0.0437723	0.25688	0.0905016	0.077056	0.545479	8.53483e-05	6.0235e-05	0.447353	0.00170443	0.0012796	K15450//tRNA wybutosine-synthesizing protein 3 [EC:2.1.1.282]	XP_713241.1|3.2e-155|tRNA methyltransferase [Candida albicans SC5314]	GO:0044237//cellular metabolic process;GO:0009987//cellular process;GO:0001510//RNA methylation;GO:0016070//RNA metabolic process;GO:0090304//nucleic acid metabolic process;GO:1901576//organic substance biosynthetic process;GO:0031591//wybutosine biosynthetic process;GO:0008152//metabolic process;GO:1901137//carbohydrate derivative biosynthetic process;GO:0010467//gene expression;GO:0006399//tRNA…
3639672	BNR1	XM_713600.1	Known_gene	1	16909	21366	NC_032096.1	+	4458	4458	17.19	12.01	10.55	28.54	29.24	31.61	13.25	29.796	-1.1529	3.66404e-06	7.23302e-07	-0.731416	8.35629e-42	2.45372e-42	-1.28371	1.79263e-107	3.44772e-108	-1.58314	7.20623e-157	1.02775e-157	K17971//BNI1-related protein 1+ko04011//MAPK signaling pathway - yeast	XP_718693.1|0.0e+00|Bnr1p [Candida albicans SC5314]	GO:0008064//regulation of actin polymerization or depolymerization;GO:1902903//regulation of supramolecular fiber organization;GO:0050789//regulation of biological process;GO:0061572//actin filament bundle organization;GO:0030833//regulation of actin filament polymerization;GO:0032535//regulation of cellular component size;GO:0000281//mitotic cytokinesis;GO:0007010//cytoskeleton organization;GO:0…
3638855	3638855	XM_714426.1	Known_gene	1	87920	89629	NC_032090.1	+	1710	1710	6.14	5.64	6.45	6.56	9.02	9.6	6.076	8.393	-0.466144	0.0680582	0.0360721	-0.0954572	0.589046	0.558534	-0.677432	2.07882e-05	1.42691e-05	-0.573735	0.000167313	0.000118279	K19564//choline transport protein	XP_719519.1|0.0e+00|hypothetical protein CAALFM_C200550WA [Candida albicans SC5314]	GO:0110165//cellular anatomical entity;GO:0016020//membrane;GO:0031224//intrinsic component of membrane;GO:0016021//integral component of membrane;GO:0022857//transmembrane transporter activity;GO:0005215//transporter activity;
3635256	RAX1	XM_718024.1	Known_gene	1	939148	940800	NC_032091.1	+	1653	1653	70.9	57.02	63.67	247.58	243.61	252.26	63.863	247.816	-1.95436	6.57442e-33	1.30111e-34	-1.80404	0	0	-2.09503	0	0	-1.98623	0	0	K12404//ADP-ribosylation factor-binding protein GGA	XP_723117.1|0.0e+00|Rax1p [Candida albicans SC5314]	GO:0008104//protein localization;GO:0051179//localization;GO:0033036//macromolecule localization;GO:0016021//integral component of membrane;GO:0031224//intrinsic component of membrane;GO:0110165//cellular anatomical entity;GO:0071944//cell periphery;GO:0005886//plasma membrane;GO:0016020//membrane;
3645573	OSM1	XM_707718.1	Known_gene	1	1165370	1166881	NC_032090.1	+	1512	1512	115.83	114.31	131.9	89.54	89.36	138.79	120.68	105.896	0.17879	0.489256	0.389745	0.371405	1.87688e-16	8.49034e-17	0.355251	2.39634e-15	1.19158e-15	-0.0734591	0.0533206	0.0445434	K18561//FAD-dependent fumarate reductase [EC:1.3.8.-]	XP_712811.1|1.1e-286|Osm1p [Candida albicans SC5314]	GO:0016628//oxidoreductase activity, acting on the CH-CH group of donors, NAD or NADP as acceptor;GO:0016627//oxidoreductase activity, acting on the CH-CH group of donors;GO:0000104//succinate dehydrogenase activity;GO:0003824//catalytic activity;GO:0016491//oxidoreductase activity;
3636579	3636579	XM_716626.1	Known_gene	1	446602	447222	NC_032091.1	-	621	621	633.69	518.46	615.76	417.12	407.47	377.32	589.303	400.636	0.531387	0.00321903	0.00115474	0.603315	2.17542e-71	4.62694e-72	0.347539	1.00841e-22	4.2809e-23	0.70658	2.74701e-91	5.45558e-92	K14817//60S ribosomal subunit assembly/export protein LOC1	XP_721719.1|4.9e-108|hypothetical protein CAALFM_C302040CA [Candida albicans SC5314]	GO:0080090//regulation of primary metabolic process;GO:0010629//negative regulation of gene expression;GO:0017148//negative regulation of translation;GO:0051169//nuclear transport;GO:0032268//regulation of cellular protein metabolic process;GO:0008298//intracellular mRNA localization;GO:0010556//regulation of macromolecule biosynthetic process;GO:0050658//RNA transport;GO:0031326//regulation of c…
3635138	WSC1	XM_717990.2	Known_gene	1	883024	884100	NC_032091.1	+	1077	1077	25.3	21.24	23.16	46.52	38.51	41.48	23.233	42.17	-0.867383	3.19732e-05	7.44428e-06	-0.878714	3.12122e-21	1.26637e-21	-0.858449	3.70549e-17	1.76899e-17	-0.840781	7.35609e-18	3.32752e-18	K11244//cell wall integrity and stress response component+ko04011//MAPK signaling pathway - yeast+ko04139//Mitophagy - yeast	SCU91441.1|4.6e-29|LAFA_0F03774g1_1 [Lachancea sp. CBS 6924]	GO:0031224//intrinsic component of membrane;GO:0016021//integral component of membrane;GO:0110165//cellular anatomical entity;GO:0016020//membrane;
3646706	3646706	XM_706604.2	Known_gene	1	1228646	1229050	NC_032096.1	-	405	405	12.1	49.43	41.28	16.25	26.18	26.19	34.27	22.873	0.537079	0.308499	0.218736	-0.425433	0.121531	0.104609	0.916922	8.77421e-08	5.50602e-08	0.656427	0.000386514	0.000278584	NA	XP_711696.1|3.2e-76|hypothetical protein CAALFM_CR05800CA [Candida albicans SC5314]	NA
3642924	3642924	XM_710352.1	Known_gene	1	1498921	1500297	NC_032092.1	-	1377	1377	220.79	181.26	167.79	117.57	124.94	118.44	189.946	120.316	0.643651	0.00165152	0.000555083	0.909155	2.45304e-131	3.4238e-132	0.536825	3.89291e-44	1.2169e-44	0.5025	9.2847e-36	3.04282e-36	NA	XP_715445.1|6.3e-257|Imp2'p [Candida albicans SC5314]	NA
3648092	3648092	XM_705216.1	Known_gene	1	697717	698832	NC_032092.1	+	1116	1116	54.55	45.29	59.61	37.75	36.04	42.93	53.15	38.906	0.429389	0.0276629	0.0130701	0.531103	3.75413e-11	1.97023e-11	0.329594	0.000106078	7.52894e-05	0.473568	5.63534e-10	3.15192e-10	NA	XP_710308.1|1.4e-209|hypothetical protein CAALFM_C403320WA [Candida albicans SC5314]	GO:0007007//inner mitochondrial membrane organization;GO:0007005//mitochondrion organization;GO:0016043//cellular component organization;GO:0071840//cellular component organization or biogenesis;GO:0007006//mitochondrial membrane organization;GO:0009987//cellular process;GO:0006996//organelle organization;GO:0061024//membrane organization;GO:0016020//membrane;GO:0031975//envelope;GO:0031224//intr…
3634842	3634842	XM_718436.1	Known_gene	1	2142636	2144831	NC_032089.1	-	2196	2196	141.32	144.6	104.45	38.53	42.76	25.31	130.123	35.533	1.8231	1.18327e-10	1.24761e-11	1.87491	0	0	1.75773	0	0	2.04503	0	0	NA	XP_723529.1|0.0e+00|putative ferric-chelate reductase [Candida albicans SC5314]	GO:0000041//transition metal ion transport;GO:0055065//metal ion homeostasis;GO:0051234//establishment of localization;GO:0050801//ion homeostasis;GO:0051649//establishment of localization in cell;GO:0008152//metabolic process;GO:0055080//cation homeostasis;GO:0006810//transport;GO:0006811//ion transport;GO:0055114//oxidation-reduction process;GO:0033212//iron import into cell;GO:0009987//cellula…
3646494	EAF6	XM_706791.2	Known_gene	1	1866411	1867046	NC_032089.1	+	636	636	28.01	20.54	33.25	78.08	96.11	67.94	27.266	80.71	-1.56518	4.20498e-10	4.76234e-11	-1.47901	3.67804e-42	1.07266e-42	-2.22625	5.13924e-89	1.09986e-89	-1.03091	9.22801e-22	3.8222e-22	K11344//chromatin modification-related protein EAF6	XP_711884.1|1.5e-112|Eaf6p [Candida albicans SC5314]	GO:0008152//metabolic process;GO:0051716//cellular response to stimulus;GO:0036211//protein modification process;GO:0071704//organic substance metabolic process;GO:0043967//histone H4 acetylation;GO:0006725//cellular aromatic compound metabolic process;GO:0043968//histone H2A acetylation;GO:0006475//internal protein amino acid acetylation;GO:0018205//peptidyl-lysine modification;GO:0050896//respo…
3643678	YST1	XM_019475329.1	Known_gene	1	1193027	1194203	NC_032091.1	-	1177	786	1622.68	3095.99	2846.81	1755.94	1488.7	1449.09	2521.83	1564.58	0.654308	0.0288926	0.0137279	-0.113865	6.10833e-14	2.9392e-14	1.05635	0	0	0.974199	0	0	K02998//small subunit ribosomal protein SAe+ko03010//Ribosome	XP_019330874.1|2.3e-147|ribosomal 40S subunit protein S0A [Candida albicans SC5314]	GO:0016043//cellular component organization;GO:0042255//ribosome assembly;GO:0006518//peptide metabolic process;GO:0006807//nitrogen compound metabolic process;GO:0044260//cellular macromolecule metabolic process;GO:0043043//peptide biosynthetic process;GO:0043933//protein-containing complex subunit organization;GO:0034645//cellular macromolecule biosynthetic process;GO:0006996//organelle organiz…
3642789	CEK1	XM_710449.2	Known_gene	1	1437628	1438893	NC_032092.1	-	1266	1266	28.83	21.88	31.52	61.03	55.98	65.27	27.41	60.76	-1.15559	5.68847e-09	7.38848e-10	-1.08195	2.2864e-45	6.43192e-46	-1.3553	3.94562e-59	1.0537e-59	-1.05015	2.61839e-46	7.51228e-47	K04371//mitogen-activated protein kinase 1/3 [EC:2.7.11.24]+ko04011//MAPK signaling pathway - yeast	KHC86273.1|5.2e-242|extracellular signal-regulated kinase 1 [Candida albicans SC5314]	GO:0010033//response to organic substance;GO:0048522//positive regulation of cellular process;GO:0070887//cellular response to chemical stimulus;GO:0048584//positive regulation of response to stimulus;GO:0043902//positive regulation of multi-organism process;GO:1900436//positive regulation of filamentous growth of a population of unicellular organisms in response to starvation;GO:0032101//regulat…
3638378	3638378	XM_714888.2	Known_gene	1	624195	624851	NC_032091.1	+	657	657	69.23	75.16	62.6	30.8	37.65	30.77	68.996	33.073	1.03766	2.01356e-06	3.82084e-07	1.16847	3.62732e-27	1.31101e-27	0.997315	2.93628e-23	1.23133e-23	1.02464	4.85418e-20	2.08822e-20	NA	XP_719981.2|8.7e-124|hypothetical protein CAALFM_C302910WA [Candida albicans SC5314]	NA
3639726	3639726	XM_713552.1	Known_gene	1	115600	116151	NC_032096.1	-	552	552	129.07	147.05	157.33	146.85	124.73	138.53	144.483	136.703	0.0571748	0.811954	0.746598	-0.18619	0.00598828	0.0046079	0.237498	0.000918303	0.000687004	0.183595	0.0130226	0.0103777	K14560//U3 small nucleolar ribonucleoprotein protein IMP3+ko03008//Ribosome biogenesis in eukaryotes	XP_718645.1|1.9e-100|snoRNA-binding rRNA-processing protein [Candida albicans SC5314]	GO:0006807//nitrogen compound metabolic process;GO:0022613//ribonucleoprotein complex biogenesis;GO:0090304//nucleic acid metabolic process;GO:0043170//macromolecule metabolic process;GO:0006396//RNA processing;GO:0071840//cellular component organization or biogenesis;GO:0010467//gene expression;GO:0016070//RNA metabolic process;GO:0034641//cellular nitrogen compound metabolic process;GO:0006725/…
3639881	POL32	XM_713394.2	Known_gene	1	1216759	1217970	NC_032089.1	+	1212	1212	57.78	81.69	88.53	67.41	60.75	52.65	76	60.27	0.307871	0.25506	0.173066	-0.222392	0.000565501	0.000407078	0.427275	2.22885e-12	1.20161e-12	0.749733	1.15458e-33	3.90504e-34	K03504//DNA polymerase delta subunit 3+ko03430//Mismatch repair+ko03440//Homologous recombination+ko03420//Nucleotide excision repair+ko03030//DNA replication+ko03410//Base excision repair	XP_718487.2|4.1e-228|DNA polymerase delta subunit [Candida albicans SC5314]	GO:0071704//organic substance metabolic process;GO:1901362//organic cyclic compound biosynthetic process;GO:1901576//organic substance biosynthetic process;GO:0043170//macromolecule metabolic process;GO:0006974//cellular response to DNA damage stimulus;GO:0046483//heterocycle metabolic process;GO:0070914//UV-damage excision repair;GO:0009058//biosynthetic process;GO:0044271//cellular nitrogen com…
3637365	3637365	XM_715854.2	Known_gene	1	837207	837875	NC_032090.1	-	669	669	1.66	2.1	2.28	0.12	0.12	0.24	2.013	0.16	2.91589	0.000136255	3.60295e-05	3.79008	0.000911595	0.000663806	4.12928	0.000107809	7.65724e-05	3.24793	0.000209047	0.000148409	NA	XP_720947.1|9.8e-123|hypothetical protein CAALFM_C204000CA [Candida albicans SC5314]	NA
3647315	BUD5	XM_705979.2	Known_gene	1	1479588	1484264	NC_032096.1	+	4677	4677	9.37	6.41	8.22	20.29	18.19	21.24	8	19.906	-1.31371	2.75806e-10	3.05942e-11	-1.11465	9.22682e-63	2.13766e-63	-1.50475	1.11885e-89	2.38514e-90	-1.36957	7.45476e-90	1.49791e-90	K11397//chromatin modification-related protein VID21	XP_711071.2|0.0e+00|Ras family guanine nucleotide exchange factor [Candida albicans SC5314]	GO:0035556//intracellular signal transduction;GO:0009987//cellular process;GO:0051716//cellular response to stimulus;GO:0050789//regulation of biological process;GO:0007154//cell communication;GO:0050794//regulation of cellular process;GO:0023052//signaling;GO:0065007//biological regulation;GO:0007165//signal transduction;GO:0007264//small GTPase mediated signal transduction;GO:0050896//response …
3634926	3634926	XM_718343.2	Known_gene	1	1936147	1938249	NC_032089.1	-	2103	2103	8.65	5.31	10.37	7.53	11.06	12.28	8.11	10.29	-0.351033	0.29693	0.208444	0.20005	0.152957	0.133341	-1.05857	8.33032e-15	4.20476e-15	-0.243895	0.0326598	0.0267558	NA	XP_723436.2|0.0e+00|hypothetical protein CAALFM_C108910CA [Candida albicans SC5314]	NA
3643189	IFF3	XM_710044.2	Known_gene	1	804770	807595	NC_032096.1	+	2826	2826	27.43	29.47	27.55	17.42	19.74	21.77	28.15	19.643	0.510076	0.00512918	0.00194658	0.65501	2.76152e-21	1.11813e-21	0.578125	1.37922e-18	6.35202e-19	0.339711	2.71588e-07	1.68238e-07	K01186//sialidase-1 [EC:3.2.1.18]+ko00600//Sphingolipid metabolism+ko00511//Other glycan degradation;K19851//flocculation protein FLO11+ko04011//MAPK signaling pathway - yeast	XP_715137.2|0.0e+00|Iff3p [Candida albicans SC5314]	GO:0009405//pathogenesis;GO:0044419//interspecies interaction between organisms;GO:0005618//cell wall;GO:0031224//intrinsic component of membrane;GO:0009986//cell surface;GO:0030312//external encapsulating structure;GO:0110165//cellular anatomical entity;GO:0071944//cell periphery;GO:0031225//anchored component of membrane;GO:0016020//membrane;GO:0005576//extracellular region;GO:0009277//fungal-t…
3643820	3643820	XM_709436.1	Known_gene	1	2038151	2039194	NC_032090.1	-	1044	1044	73.11	67.06	79.31	218.6	210.22	168.58	73.16	199.133	-1.45074	1.93902e-13	1.49305e-14	-1.58015	3.32762e-228	3.02612e-229	-1.64838	4.87348e-234	5.31652e-235	-1.08786	2.55159e-100	4.8039e-101	K01057//6-phosphogluconolactonase [EC:3.1.1.31]+ko00030//Pentose phosphate pathway+ko01100//Metabolic pathways+ko01130//Biosynthesis of antibiotics+ko01110//Biosynthesis of secondary metabolites+ko01200//Carbon metabolism	XP_714529.1|2.2e-198|hypothetical protein CAALFM_C209970CA [Candida albicans SC5314]	GO:1901135//carbohydrate derivative metabolic process;GO:0009051//pentose-phosphate shunt, oxidative branch;GO:0005975//carbohydrate metabolic process;GO:0009987//cellular process;GO:0071704//organic substance metabolic process;GO:0019637//organophosphate metabolic process;GO:0006793//phosphorus metabolic process;GO:0051156//glucose 6-phosphate metabolic process;GO:0006796//phosphate-containing c…
3636416	3636416	XM_716793.1	Known_gene	1	1065586	1066695	NC_032093.1	-	1110	1110	38.9	57.25	73.95	33.71	36.6	38.89	56.7	36.4	0.608617	0.0243527	0.01134	0.206594	0.0270228	0.0219144	0.645432	3.83851e-16	1.87411e-16	0.927151	1.49382e-36	4.83338e-37	K06944//uncharacterized protein	XP_721886.1|3.3e-208|hypothetical protein CAALFM_C504900CA [Candida albicans SC5314]	GO:0034645//cellular macromolecule biosynthetic process;GO:0048584//positive regulation of response to stimulus;GO:0044237//cellular metabolic process;GO:0044267//cellular protein metabolic process;GO:1901576//organic substance biosynthetic process;GO:0043604//amide biosynthetic process;GO:0006412//translation;GO:0032103//positive regulation of response to external stimulus;GO:0032101//regulation…
3647054	3647054	XM_706243.2	Known_gene	1	315377	317962	NC_032093.1	-	2586	2586	21.19	19.07	25.8	21.23	19.83	23.64	22.02	21.566	0.0133198	0.960797	0.938586	-0.00272078	0.957588	0.951368	-0.0563798	0.48678	0.457386	0.126141	0.0767164	0.0650594	K20179//vacuolar protein sorting-associated protein 11+ko04138//Autophagy - yeast	XP_711335.2|0.0e+00|hypothetical protein CAALFM_C501410CA [Candida albicans SC5314]	GO:0043227//membrane-bounded organelle;GO:0043226//organelle;GO:0030176//integral component of endoplasmic reticulum membrane;GO:0031224//intrinsic component of membrane;GO:0031301//integral component of organelle membrane;GO:0012505//endomembrane system;GO:0031090//organelle membrane;GO:0042175//nuclear outer membrane-endoplasmic reticulum membrane network;GO:0098796//membrane protein complex;GO…
3643182	3643182	XM_710062.2	Known_gene	1	801143	803746	NC_032096.1	-	2604	2604	98.3	50.07	56.66	54.21	67.12	70.73	68.343	64.02	0.0886178	0.812777	0.747845	0.858632	5.09816e-106	8.25352e-107	-0.422796	8.64212e-22	3.72786e-22	-0.319992	3.29073e-14	1.6174e-14	NA	XP_715155.2|0.0e+00|hypothetical protein CAALFM_CR03620CA [Candida albicans SC5314]	GO:0006996//organelle organization;GO:0071840//cellular component organization or biogenesis;GO:0007005//mitochondrion organization;GO:0009987//cellular process;GO:0016043//cellular component organization;GO:0000002//mitochondrial genome maintenance;GO:0031975//envelope;GO:0043231//intracellular membrane-bounded organelle;GO:0032592//integral component of mitochondrial membrane;GO:0031301//integr…
3636980	3636980	XM_716298.2	Known_gene	1	369530	369886	NC_032095.1	+	357	357	28.1	26.13	23.94	8.26	3.27	2.85	26.056	4.793	2.26589	5.93198e-07	1.02697e-07	1.76636	1.371e-09	7.58344e-10	2.99834	5.27535e-16	2.58356e-16	3.07039	4.26688e-15	2.05524e-15	NA	XP_721391.2|4.4e-69|hypothetical protein CAALFM_C701690WA [Candida albicans SC5314]	GO:0006810//transport;GO:0072655//establishment of protein localization to mitochondrion;GO:0017038//protein import;GO:0070585//protein localization to mitochondrion;GO:0051649//establishment of localization in cell;GO:0042886//amide transport;GO:0072594//establishment of protein localization to organelle;GO:0006996//organelle organization;GO:0070727//cellular macromolecule localization;GO:004474…
3637945	3637945	XM_715241.1	Known_gene	1	148191	150485	NC_032095.1	+	2295	2295	47.99	41.58	50.87	41.73	41.56	39.89	46.813	41.06	0.17161	0.359917	0.265464	0.201649	0.000254204	0.000179052	0.000694104	0.995946	0.99362	0.350788	1.07985e-10	5.89044e-11	K06100//symplekin+ko03015//mRNA surveillance pathway	XP_720334.1|0.0e+00|RNA-processing protein [Candida albicans SC5314]	GO:0042493//response to drug;GO:0042221//response to chemical;GO:0050896//response to stimulus;
3643798	3643798	XM_709472.2	Known_gene	1	1967507	1968607	NC_032090.1	+	1101	1101	41.94	34.41	38.79	70.04	62.63	71.56	38.38	68.076	-0.834307	7.1968e-06	1.4913e-06	-0.739852	3.12465e-24	1.1897e-24	-0.864026	5.43419e-28	2.09572e-28	-0.883469	4.53612e-33	1.54781e-33	K15115//solute carrier family 25 (mitochondrial folate transporter), member 32	XP_714565.2|1.7e-209|NAD+ transporter [Candida albicans SC5314]	GO:0071702//organic substance transport;GO:0006810//transport;GO:0006862//nucleotide transport;GO:0051234//establishment of localization;GO:0051179//localization;GO:0071705//nitrogen compound transport;GO:0009987//cellular process;GO:1901679//nucleotide transmembrane transport;GO:0055085//transmembrane transport;GO:0015748//organophosphate ester transport;GO:0015931//nucleobase-containing compoun…
3637990	3637990	XM_715272.1	Known_gene	1	75620	76342	NC_032095.1	+	723	723	7.41	6.39	5.64	4.46	5.38	7.44	6.48	5.76	0.160816	0.705356	0.620309	0.73243	0.0140341	0.0111263	0.24821	0.412498	0.383324	-0.399607	0.152496	0.132856	K12386//cystinosin	KGR09719.1|1.4e-135|hypothetical protein MG9_05006 [Candida albicans P37037]	GO:0031224//intrinsic component of membrane;GO:0016020//membrane;GO:0110165//cellular anatomical entity;GO:0016021//integral component of membrane;
3637026	GRX1	XM_716255.2	Known_gene	1	460994	461365	NC_032095.1	+	372	372	18.63	28.13	28.72	9.09	2.78	6.16	25.16	6.01	1.91248	2.4227e-05	5.55252e-06	1.03528	0.000889232	0.000647226	3.33895	5.48267e-20	2.4592e-20	2.22105	1.43082e-13	7.14694e-14	K03676//glutaredoxin 3	BAE44724.1|2.1e-66|hypothetical protein [Candida albicans]	GO:0042592//homeostatic process;GO:0050896//response to stimulus;GO:0006950//response to stress;GO:0065007//biological regulation;GO:0033554//cellular response to stress;GO:0042221//response to chemical;GO:0050789//regulation of biological process;GO:0019725//cellular homeostasis;GO:0050794//regulation of cellular process;GO:0062197//cellular response to chemical stress;GO:0009987//cellular proce…
3643223	3643223	XM_710052.2	Known_gene	1	825518	829063	NC_032096.1	-	3546	3546	36.18	31.5	27.51	37.56	40.84	40.35	31.73	39.583	-0.320324	0.142509	0.0859372	-0.0540047	0.264705	0.238252	-0.374631	4.64903e-15	2.33188e-15	-0.552613	6.48298e-29	2.36766e-29	K11682//SWR1-complex protein 3;K17976//mitochondrial MYO2 receptor-related protein 1	XP_715145.2|0.0e+00|hypothetical protein CAALFM_CR03700CA [Candida albicans SC5314]	NA
3640518	ESA1	XM_712695.1	Known_gene	1	70068	71693	NC_032091.1	+	1626	1626	89.03	75.61	63.55	58.62	65.62	66.1	76.063	63.446	0.254963	0.291718	0.204101	0.602899	4.20001e-32	1.40117e-32	0.204441	8.92059e-05	6.30468e-05	-0.0567581	0.2881	0.259108	K11304//histone acetyltransferase HTATIP [EC:2.3.1.48]	XP_717788.1|0.0e+00|NuA4 histone acetyltransferase complex catalytic subunit [Candida albicans SC5314]	GO:0009987//cellular process;GO:0044260//cellular macromolecule metabolic process;GO:0030447//filamentous growth;GO:0010629//negative regulation of gene expression;GO:0045944//positive regulation of transcription by RNA polymerase II;GO:0071840//cellular component organization or biogenesis;GO:0043412//macromolecule modification;GO:0043967//histone H4 acetylation;GO:0031323//regulation of cellula…
3640511	ERG4	XM_712663.2	Known_gene	1	143568	144977	NC_032091.1	+	1410	1410	220.68	225.38	275.49	30.97	26.53	54.68	240.516	37.393	2.62097	1.89189e-21	7.07925e-23	2.83301	0	0	3.08666	0	0	2.33291	0	0	K00223//Delta24(24(1))-sterol reductase [EC:1.3.1.71]+ko01100//Metabolic pathways+ko01130//Biosynthesis of antibiotics+ko00100//Steroid biosynthesis	XP_717756.2|8.9e-291|delta(24(24(1)))-sterol reductase [Candida albicans SC5314]	GO:1901360//organic cyclic compound metabolic process;GO:0016128//phytosteroid metabolic process;GO:0009058//biosynthetic process;GO:0008610//lipid biosynthetic process;GO:0044108//cellular alcohol biosynthetic process;GO:0016129//phytosteroid biosynthetic process;GO:0006629//lipid metabolic process;GO:1901617//organic hydroxy compound biosynthetic process;GO:0044237//cellular metabolic process;G…
3637909	3637909	XM_715368.2	Known_gene	1	595171	595815	NC_032092.1	+	645	645	386.27	313.06	296.26	166.83	201.1	189.18	331.863	185.703	0.819003	5.61565e-05	1.36726e-05	1.21123	5.13727e-150	6.49432e-151	0.638526	1.15418e-42	3.66758e-43	0.647104	3.19523e-40	9.8327e-41	K16833//protein phosphatase inhibitor 2	XP_720461.2|1.2e-120|hypothetical protein CAALFM_C402860WA [Candida albicans SC5314]	GO:0050794//regulation of cellular process;GO:0051246//regulation of protein metabolic process;GO:0035303//regulation of dephosphorylation;GO:0065009//regulation of molecular function;GO:0009966//regulation of signal transduction;GO:0031399//regulation of protein modification process;GO:0035304//regulation of protein dephosphorylation;GO:0048583//regulation of response to stimulus;GO:0019220//reg…
3644551	PSP1	XM_708711.2	Known_gene	1	2481346	2483355	NC_032089.1	-	2010	2010	191.11	205.81	163.36	216.41	166.42	135.06	186.76	172.63	0.0962713	0.773689	0.698546	-0.179364	2.67172e-11	1.39727e-11	0.306484	2.70046e-27	1.05541e-27	0.274454	1.26206e-17	5.74044e-18	NA	XP_713804.2|0.0e+00|Psp1p [Candida albicans SC5314]	GO:0110165//cellular anatomical entity;GO:0005622//intracellular;GO:0005737//cytoplasm;
3636140	MYO2	XM_717126.1	Known_gene	1	3025935	3030620	NC_032089.1	+	4686	4686	15.03	27.06	34.11	41.69	40.05	40.35	25.4	40.696	-0.686112	0.0265721	0.0124972	-1.47186	1.70162e-195	1.75717e-196	-0.56564	1.51099e-39	4.998e-40	-0.242374	3.03831e-09	1.73885e-09	K10357//myosin V	XP_722219.1|0.0e+00|myosin 2 [Candida albicans SC5314]	GO:0040008//regulation of growth;GO:0007010//cytoskeleton organization;GO:0009408//response to heat;GO:0051650//establishment of vesicle localization;GO:0009266//response to temperature stimulus;GO:0044182//filamentous growth of a population of unicellular organisms;GO:0006950//response to stress;GO:0051649//establishment of localization in cell;GO:0006997//nucleus organization;GO:0051647//nucleu…
3643117	3643117	XM_710140.1	Known_gene	1	868066	868530	NC_032095.1	-	465	465	195.1	164.98	154.19	57.56	67.87	67.23	171.423	64.22	1.38789	5.84237e-12	5.36336e-13	1.76108	1.59596e-86	2.9612e-87	1.28145	1.15144e-46	3.49368e-47	1.19753	9.58466e-39	3.00858e-39	NA	XP_715233.1|7.2e-80|hypothetical protein CAALFM_C703970CA [Candida albicans SC5314]	GO:0016192//vesicle-mediated transport;GO:0045324//late endosome to vacuole transport;GO:0051179//localization;GO:0032880//regulation of protein localization;GO:0046907//intracellular transport;GO:0048519//negative regulation of biological process;GO:0065007//biological regulation;GO:0032511//late endosome to vacuole transport via multivesicular body sorting pathway;GO:1903828//negative regulatio…
3641911	3641911	XM_711330.1	Known_gene	1	1911649	1912971	NC_032096.1	+	1323	1323	49.05	35.11	40.5	88.37	93.85	107.51	41.553	96.576	-1.21342	1.29205e-09	1.54066e-10	-0.849304	3.52108e-46	9.82312e-47	-1.41847	2.9519e-110	5.5739e-111	-1.40848	2.11503e-124	3.51682e-125	K00249//acyl-CoA dehydrogenase [EC:1.3.8.7]+ko00410//beta-Alanine metabolism+ko00280//Valine, leucine and isoleucine degradation+ko01100//Metabolic pathways+ko01130//Biosynthesis of antibiotics+ko00640//Propanoate metabolism+ko01110//Biosynthesis of secondary metabolites+ko01212//Fatty acid metabolism+ko00071//Fatty acid degradation+ko01200//Carbon metabolism	XP_716423.1|3.0e-256|hypothetical protein CAALFM_CR08920WA [Candida albicans SC5314]	GO:0036094//small molecule binding;GO:0050660//flavin adenine dinucleotide binding;GO:0016491//oxidoreductase activity;GO:0097159//organic cyclic compound binding;GO:0043168//anion binding;GO:1901363//heterocyclic compound binding;GO:0043167//ion binding;GO:0005488//binding;GO:0000166//nucleotide binding;GO:0003824//catalytic activity;GO:1901265//nucleoside phosphate binding;GO:0016627//oxidoredu…
3638369	PAM17	XM_714846.2	Known_gene	1	547221	547778	NC_032091.1	+	558	558	45.74	59.14	92.2	99.94	139.81	118.09	65.693	119.28	-0.868768	0.00273536	0.00096486	-1.12761	1.5573e-30	5.33278e-31	-1.24126	2.49162e-48	7.41876e-49	-0.357048	4.3696e-06	2.85458e-06	K17806//mitochondrial import inner membrane translocase subunit TIM23	XP_719939.2|6.8e-101|Pam17p [Candida albicans SC5314]	GO:0006839//mitochondrial transport;GO:0051234//establishment of localization;GO:0071840//cellular component organization or biogenesis;GO:0045184//establishment of protein localization;GO:0015833//peptide transport;GO:0006605//protein targeting;GO:0051641//cellular localization;GO:0070727//cellular macromolecule localization;GO:0072594//establishment of protein localization to organelle;GO:00511…
3642791	3642791	XM_710451.2	Known_gene	1	1434027	1434701	NC_032092.1	-	675	675	49.07	33.58	36	27.59	37.24	26.66	39.55	30.496	0.355084	0.23137	0.154106	0.830696	4.94988e-12	2.52688e-12	-0.149251	0.235342	0.211356	0.43332	0.00127368	0.00094879	K20312//TRAPP-associated protein TCA17	XP_715544.2|3.3e-126|hypothetical protein CAALFM_C406460CA, partial [Candida albicans SC5314]	GO:0051234//establishment of localization;GO:0006888//endoplasmic reticulum to Golgi vesicle-mediated transport;GO:0009987//cellular process;GO:0016192//vesicle-mediated transport;GO:0006810//transport;GO:0048193//Golgi vesicle transport;GO:0051649//establishment of localization in cell;GO:0046907//intracellular transport;GO:0051641//cellular localization;GO:0051179//localization;GO:0005737//cyto…
6335429	LYS1	XM_443225.2	Known_gene	1	1158925	1160073	NC_032092.1	+	1149	1149	117.1	467.84	330.79	98.01	101.41	106.8	305.243	102.073	1.50124	0.000358128	0.000104712	0.25674	8.17584e-07	5.06156e-07	2.20582	0	0	1.631	0	0	K00290//saccharopine dehydrogenase (NAD+, L-lysine forming) [EC:1.5.1.7]+ko00310//Lysine degradation+ko00300//Lysine biosynthesis+ko01100//Metabolic pathways+ko01230//Biosynthesis of amino acids+ko01130//Biosynthesis of antibiotics+ko01110//Biosynthesis of secondary metabolites	P43065.1|3.1e-209|RecName: Full=Saccharopine dehydrogenase [NAD(+), L-lysine-forming]; Short=SDH; AltName: Full=Lysine--2-oxoglutarate reductase [Candida albicans SC5314]	GO:0009067//aspartate family amino acid biosynthetic process;GO:0019878//lysine biosynthetic process via aminoadipic acid;GO:0006807//nitrogen compound metabolic process;GO:0006082//organic acid metabolic process;GO:0006553//lysine metabolic process;GO:0009987//cellular process;GO:0008152//metabolic process;GO:0044283//small molecule biosynthetic process;GO:0009058//biosynthetic process;GO:004424…
3645561	3645561	XM_707706.1	Known_gene	1	1129692	1130708	NC_032090.1	+	1017	1017	48.17	36.5	45.48	43.35	42.33	45.6	43.383	43.76	-0.0285789	0.911613	0.872733	0.152103	0.0875029	0.0743862	-0.213784	0.0197971	0.0160853	-0.00380157	0.916925	0.905926	K17741//NADPH-dependent methylglyoxal reductase [EC:1.1.1.283]+ko04011//MAPK signaling pathway - yeast+ko00640//Propanoate metabolism+ko00620//Pyruvate metabolism	XP_712799.1|2.1e-185|hypothetical protein CAALFM_C205560WA [Candida albicans SC5314]	GO:0040007//growth;GO:0030447//filamentous growth;GO:0016614//oxidoreductase activity, acting on CH-OH group of donors;GO:0016491//oxidoreductase activity;GO:0016616//oxidoreductase activity, acting on the CH-OH group of donors, NAD or NADP as acceptor;GO:0003824//catalytic activity;
3638892	VPS24	XM_019475197.1	Known_gene	1	154508	155250	NC_032090.1	-	743	672	77.88	61.39	53.73	51.68	56.73	45.95	64.333	51.453	0.305442	0.266547	0.182589	0.591647	1.43548e-10	7.69146e-11	0.113892	0.247969	0.223234	0.225663	0.0404108	0.0333884	K12193//charged multivesicular body protein 3+ko04144//Endocytosis	XP_019330742.1|2.8e-117|ESCRT-III subunit protein [Candida albicans SC5314]	GO:0045184//establishment of protein localization;GO:0008104//protein localization;GO:0046907//intracellular transport;GO:0016192//vesicle-mediated transport;GO:0033365//protein localization to organelle;GO:0033036//macromolecule localization;GO:0006605//protein targeting;GO:0015833//peptide transport;GO:0006886//intracellular protein transport;GO:0051234//establishment of localization;GO:0070727…
3646673	3646673	XM_706636.2	Known_gene	1	1641986	1645111	NC_032089.1	-	3126	3126	19.8	10.75	16.48	26.99	33.92	30.23	15.676	30.38	-0.95183	0.000296124	8.45578e-05	-0.446925	2.44919e-12	1.23806e-12	-1.6578	3.56899e-126	6.1676e-127	-0.875265	8.69128e-42	2.62534e-42	K11824//AP-2 complex subunit alpha+ko04144//Endocytosis	XP_711728.2|0.0e+00|hypothetical protein CAALFM_C107590CA [Candida albicans SC5314]	GO:0051234//establishment of localization;GO:0070727//cellular macromolecule localization;GO:0006897//endocytosis;GO:0045184//establishment of protein localization;GO:0006886//intracellular protein transport;GO:0009987//cellular process;GO:0046907//intracellular transport;GO:0006810//transport;GO:0033036//macromolecule localization;GO:0016192//vesicle-mediated transport;GO:0042886//amide transpor…
3641113	3641113	XM_712111.2	Known_gene	1	1033241	1034341	NC_032092.1	+	1101	1101	105.58	88.65	120.65	226.62	243.52	288.84	104.96	252.993	-1.27374	6.37345e-13	5.29973e-14	-1.10194	3.49541e-145	4.50608e-146	-1.45785	1.19395e-240	1.27062e-241	-1.25944	2.59623e-228	2.77272e-229	NA	XP_717204.2|8.4e-204|hypothetical protein CAALFM_C404800WA [Candida albicans SC5314]	GO:0031224//intrinsic component of membrane;GO:0043227//membrane-bounded organelle;GO:0012505//endomembrane system;GO:0016020//membrane;GO:0005789//endoplasmic reticulum membrane;GO:0110165//cellular anatomical entity;GO:0043226//organelle;GO:0042175//nuclear outer membrane-endoplasmic reticulum membrane network;GO:0031090//organelle membrane;GO:0016021//integral component of membrane;
3641214	JEN2	XM_712017.1	Known_gene	1	864733	866274	NC_032092.1	+	1542	1542	10.93	2.99	0.48	6.29	8.65	9.96	4.8	8.3	-0.570604	0.577384	0.478001	0.797161	3.67276e-07	2.234e-07	-1.53255	1.06834e-14	5.4103e-15	-4.37504	1.66159e-49	4.60384e-50	K08178//MFS transporter, SHS family, lactate transporter	XP_717110.1|6.5e-303|Jen2p [Candida albicans SC5314]	GO:0015718//monocarboxylic acid transport;GO:0006835//dicarboxylic acid transport;GO:1903825//organic acid transmembrane transport;GO:0015849//organic acid transport;GO:0035879//plasma membrane lactate transport;GO:0035873//lactate transmembrane transport;GO:0046942//carboxylic acid transport;GO:0098656//anion transmembrane transport;GO:0015850//organic hydroxy compound transport;GO:0051179//loca…
3641014	3641014	XM_712311.2	Known_gene	1	992082	993203	NC_032096.1	-	1122	1122	292.9	753.14	505.36	148.2	180.36	195.3	517.133	174.62	1.51889	7.45062e-06	1.54886e-06	0.982863	2.4396e-157	2.9662e-158	2.06204	0	0	1.37162	0	0	K01069//hydroxyacylglutathione hydrolase [EC:3.1.2.6]+ko00620//Pyruvate metabolism	XP_717404.2|1.2e-216|hypothetical protein CAALFM_CR04500CA [Candida albicans SC5314]	GO:0043167//ion binding;GO:0046872//metal ion binding;GO:0051213//dioxygenase activity;GO:0043169//cation binding;GO:0005488//binding;GO:0003824//catalytic activity;GO:0016491//oxidoreductase activity;
3643809	SSO2	XM_709457.1	Known_gene	1	1989824	1990711	NC_032090.1	+	888	888	497.21	477.82	501.96	150.4	147.23	142.24	492.33	146.623	1.72069	1.446e-30	3.22241e-32	1.72505	0	0	1.6984	0	0	1.81925	0	0	K08486//syntaxin 1B/2/3+ko04130//SNARE interactions in vesicular transport	XP_714550.1|1.1e-164|syntaxin [Candida albicans SC5314]	GO:0009987//cellular process;GO:0046903//secretion;GO:0015031//protein transport;GO:0044419//interspecies interaction between organisms;GO:0045184//establishment of protein localization;GO:0051179//localization;GO:0006996//organelle organization;GO:0002790//peptide secretion;GO:0033036//macromolecule localization;GO:0070727//cellular macromolecule localization;GO:0071705//nitrogen compound transp…
3638509	3638509	XM_714809.1	Known_gene	1	1585276	1587105	NC_032091.1	+	1830	1830	225.02	172.18	181.42	262.06	280.71	294.4	192.873	279.056	-0.536514	0.00568829	0.00218904	-0.219844	1.89634e-17	8.37306e-18	-0.705163	1.93513e-148	2.96322e-149	-0.698444	4.77769e-153	6.86962e-154	NA	XP_719902.1|0.0e+00|hypothetical protein CAALFM_C306940WA [Candida albicans SC5314]	GO:0090304//nucleic acid metabolic process;GO:0006807//nitrogen compound metabolic process;GO:0008152//metabolic process;GO:0006139//nucleobase-containing compound metabolic process;GO:0071704//organic substance metabolic process;GO:0015074//DNA integration;GO:0006725//cellular aromatic compound metabolic process;GO:0044238//primary metabolic process;GO:0034641//cellular nitrogen compound metabol…
3647716	ERG24	XM_705587.2	Known_gene	1	1913246	1914592	NC_032090.1	-	1347	1347	222.83	258.82	263.92	27.92	23.4	37.22	248.523	29.513	3.02448	4.15123e-45	4.34936e-47	2.99657	0	0	3.46737	0	0	2.82595	0	0	K00222//Delta14-sterol reductase [EC:1.3.1.70]+ko01100//Metabolic pathways+ko01130//Biosynthesis of antibiotics+ko01110//Biosynthesis of secondary metabolites+ko00100//Steroid biosynthesis	XP_710679.2|8.0e-265|delta(14)-sterol reductase [Candida albicans SC5314]	GO:0008152//metabolic process;GO:1901362//organic cyclic compound biosynthetic process;GO:0044283//small molecule biosynthetic process;GO:0044107//cellular alcohol metabolic process;GO:0009405//pathogenesis;GO:0009058//biosynthetic process;GO:0070887//cellular response to chemical stimulus;GO:1901360//organic cyclic compound metabolic process;GO:0044255//cellular lipid metabolic process;GO:004441…
3635806	3635806	XM_717496.1	Known_gene	1	457206	458084	NC_032090.1	+	879	879	60.87	44.53	90.7	53.01	63.31	56.96	65.366	57.76	0.146709	0.650735	0.557556	0.199467	0.0201427	0.0161739	-0.507656	1.86117e-09	1.09776e-09	0.671153	4.48462e-20	1.927e-20	NA	XP_722589.1|1.6e-165|hypothetical protein CAALFM_C202280WA [Candida albicans SC5314]	GO:0110165//cellular anatomical entity;GO:0031966//mitochondrial membrane;GO:0031224//intrinsic component of membrane;GO:0043229//intracellular organelle;GO:0005737//cytoplasm;GO:0005622//intracellular;GO:0031090//organelle membrane;GO:0016021//integral component of membrane;GO:0005739//mitochondrion;GO:0071944//cell periphery;GO:0005886//plasma membrane;GO:0043231//intracellular membrane-bounded…
3636935	SEC1	XM_716227.1	Known_gene	1	502656	504995	NC_032095.1	+	2340	2340	48.53	42.4	45.47	38.58	43.28	45.23	45.466	42.363	0.0925058	0.637086	0.541518	0.331024	1.59175e-09	8.831e-10	-0.0296362	0.607242	0.580704	0.00763501	0.933109	0.924092	K15292//syntaxin-binding protein 1	XP_721320.1|0.0e+00|Sec1p [Candida albicans SC5314]	GO:0140029//exocytic process;GO:0051640//organelle localization;GO:0140352//export from cell;GO:0046903//secretion;GO:0051179//localization;GO:0051234//establishment of localization;GO:0006904//vesicle docking involved in exocytosis;GO:0022406//membrane docking;GO:0140056//organelle localization by membrane tethering;GO:0006810//transport;GO:0006887//exocytosis;GO:0048278//vesicle docking;GO:0051…
3645961	NAG6	XM_707333.2	Known_gene	1	1016757	1019129	NC_032094.1	+	2373	2373	267.8	228.8	220.46	136.43	139.46	158.11	239.02	144.666	0.712229	9.755e-05	2.49675e-05	0.972995	0	0	0.714236	3.86971e-163	5.46084e-164	0.479588	1.67673e-76	3.68478e-77	K22698//protein SEY1 [EC:3.6.5.-]	XP_712426.1|0.0e+00|dynamin-like GTPase [Candida albicans SC5314]	GO:0071840//cellular component organization or biogenesis;GO:0010256//endomembrane system organization;GO:0035690//cellular response to drug;GO:0006996//organelle organization;GO:0090174//organelle membrane fusion;GO:0061025//membrane fusion;GO:0051716//cellular response to stimulus;GO:0050896//response to stimulus;GO:0006810//transport;GO:0051179//localization;GO:0008645//hexose transmembrane tr…
3634923	HEM14	XM_718340.2	Known_gene	1	1931304	1932899	NC_032089.1	+	1596	1596	22.41	16.48	23.06	41.87	40.62	62.86	20.65	48.45	-1.22187	5.65752e-07	9.77576e-08	-0.901774	3.29871e-30	1.13455e-30	-1.30147	3.0179e-52	8.59812e-53	-1.44675	2.38097e-93	4.67308e-94	K00231//protoporphyrinogen/coproporphyrinogen III oxidase [EC:1.3.3.4 1.3.3.15]+ko00860//Porphyrin and chlorophyll metabolism+ko01100//Metabolic pathways+ko01110//Biosynthesis of secondary metabolites	XP_723433.2|2.9e-306|oxygen-dependent protoporphyrinogen oxidase [Candida albicans SC5314]	GO:0033013//tetrapyrrole metabolic process;GO:0042168//heme metabolic process;GO:0071704//organic substance metabolic process;GO:0006807//nitrogen compound metabolic process;GO:0033014//tetrapyrrole biosynthetic process;GO:0008152//metabolic process;GO:1901360//organic cyclic compound metabolic process;GO:0019438//aromatic compound biosynthetic process;GO:0046501//protoporphyrinogen IX metabolic …
3641876	PDK2	XM_711323.1	Known_gene	1	1902380	1903915	NC_032096.1	+	1536	1536	248.79	139.02	134.48	400.57	330.35	325.07	174.096	351.996	-1.00296	0.00111743	0.000360708	-0.687126	3.436e-167	3.96594e-168	-1.2487	0	0	-1.27336	0	0	K00898//pyruvate dehydrogenase kinase 2/3/4 [EC:2.7.11.2]	XP_716416.1|3.3e-299|protein kinase [Candida albicans SC5314]	GO:0042493//response to drug;GO:0065008//regulation of biological quality;GO:0065009//regulation of molecular function;GO:0050896//response to stimulus;GO:0051341//regulation of oxidoreductase activity;GO:0009892//negative regulation of metabolic process;GO:0044092//negative regulation of molecular function;GO:0070887//cellular response to chemical stimulus;GO:0048878//chemical homeostasis;GO:190…
3643535	3643535	XM_019475251.1	Known_gene	1	1437380	1438551	NC_032090.1	+	1172	1104	212.83	206.83	249.44	186.45	203.08	208.16	223.033	199.23	0.146456	0.385458	0.288917	0.190913	1.21242e-06	7.56246e-07	0.0263973	0.510449	0.481244	0.261	8.73372e-13	4.46872e-13	NA	XP_019330796.1|3.9e-201|hypothetical protein CAALFM_C207010WA [Candida albicans SC5314]	GO:0005783//endoplasmic reticulum;GO:0043226//organelle;GO:0110165//cellular anatomical entity;GO:0043229//intracellular organelle;GO:0043227//membrane-bounded organelle;GO:0005622//intracellular;GO:0012505//endomembrane system;GO:0043231//intracellular membrane-bounded organelle;GO:0005737//cytoplasm;GO:0043169//cation binding;GO:0046872//metal ion binding;GO:0005488//binding;GO:0005509//calcium…
3645359	3645359	XM_704855.2	Known_gene	1	792424	793434	NC_032092.1	-	1011	1011	180.25	248.24	266.62	158.44	107.65	110.22	231.703	125.436	0.843176	0.002014	0.00068864	0.186063	3.84764e-05	2.57684e-05	1.20539	3.38745e-166	4.72944e-167	1.2744	1.04655e-192	1.26416e-193	K04125//gibberellin 2beta-dioxygenase [EC:1.14.11.13]+ko00904//Diterpenoid biosynthesis+ko01110//Biosynthesis of secondary metabolites;K18696//glycerophosphodiester phosphodiesterase [EC:3.1.4.46]+ko00564//Glycerophospholipid metabolism	XP_709947.2|1.2e-191|hypothetical protein CAALFM_C403720CA [Candida albicans SC5314]	GO:0046872//metal ion binding;GO:0043169//cation binding;GO:0043167//ion binding;GO:0051213//dioxygenase activity;GO:0003824//catalytic activity;GO:0016491//oxidoreductase activity;GO:0005488//binding;
3641260	UBC15	XM_712047.1	Known_gene	1	2184896	2185423	NC_032090.1	+	528	528	226.42	205.63	193.62	45.64	88.2	119.51	208.556	84.45	1.27015	0.000101409	2.59889e-05	2.31063	2.7008e-170	3.08586e-171	1.2212	9.56775e-64	2.45458e-64	0.696097	1.5483e-23	6.19886e-24	K10688//ubiquitin-conjugating enzyme E2 W [EC:2.3.2.25]+ko04120//Ubiquitin mediated proteolysis	XP_717140.1|1.7e-98|Ubc15p [Candida albicans SC5314]	GO:0006807//nitrogen compound metabolic process;GO:0036211//protein modification process;GO:0010498//proteasomal protein catabolic process;GO:0044237//cellular metabolic process;GO:0019538//protein metabolic process;GO:0071704//organic substance metabolic process;GO:0030163//protein catabolic process;GO:0043412//macromolecule modification;GO:0044257//cellular protein catabolic process;GO:0043161/…
3645467	3645467	XM_707840.2	Known_gene	1	929893	930708	NC_032090.1	+	816	816	6.7	15.38	15.92	14.1	10.16	12.76	12.666	12.34	0.0142031	0.979484	0.967267	-1.07346	2.28335e-07	1.37214e-07	0.598155	0.00117711	0.000886316	0.319212	0.0762469	0.0646358	NA	XP_712933.2|4.1e-147|hypothetical protein CAALFM_C204450WA [Candida albicans SC5314]	NA
3639282	SIN3	XM_019475060.1	Known_gene	1	185507	190145	NC_032089.1	-	4639	4236	36.76	29.8	32.47	89.7	80.63	76.06	33.01	82.13	-1.3167	4.48761e-12	4.06743e-13	-1.28697	0	0	-1.436	0	0	-1.22803	3.26177e-243	3.29872e-244	K11644//paired amphipathic helix protein Sin3a+ko04139//Mitophagy - yeast	XP_019330605.1|0.0e+00|transcriptional regulator [Candida albicans SC5314]	GO:0006325//chromatin organization;GO:0006355//regulation of transcription, DNA-templated;GO:0000122//negative regulation of transcription by RNA polymerase II;GO:0051253//negative regulation of RNA metabolic process;GO:1903506//regulation of nucleic acid-templated transcription;GO:0060255//regulation of macromolecule metabolic process;GO:0051171//regulation of nitrogen compound metabolic process…
3642573	3642573	XM_710665.2	Known_gene	1	615879	618245	NC_032096.1	+	2367	2367	1.28	1.15	2.03	2.67	4.18	3.77	1.486	3.54	-1.23119	0.000236132	6.58561e-05	-1.0607	6.33222e-05	4.29988e-05	-1.86187	7.27557e-15	3.66752e-15	-0.893085	3.98188e-05	2.73132e-05	K11547//kinetochore protein NDC80	XP_715758.2|0.0e+00|kinetochore-associated Ndc80 complex subunit [Candida albicans SC5314]	GO:0051315//attachment of mitotic spindle microtubules to kinetochore;GO:0000280//nuclear division;GO:0008608//attachment of spindle microtubules to kinetochore;GO:0140014//mitotic nuclear division;GO:0051656//establishment of organelle localization;GO:0007049//cell cycle;GO:0006996//organelle organization;GO:0022402//cell cycle process;GO:0051303//establishment of chromosome localization;GO:0007…
3645429	CYS4	XM_707868.2	Known_gene	1	384790	386280	NC_032089.1	-	1491	1491	292.89	390.17	420.03	550.25	483.85	497.61	367.696	510.57	-0.486478	0.0264035	0.0123916	-0.909728	0	0	-0.310457	1.54339e-46	4.69324e-47	-0.244523	1.41251e-31	4.93038e-32	K01697//cystathionine beta-synthase [EC:4.2.1.22]+ko01100//Metabolic pathways+ko01230//Biosynthesis of amino acids+ko01130//Biosynthesis of antibiotics+ko00260//Glycine, serine and threonine metabolism+ko00270//Cysteine and methionine metabolism	XP_712961.1|1.7e-279|cystathionine beta-synthase [Candida albicans SC5314]	GO:0000097//sulfur amino acid biosynthetic process;GO:0044249//cellular biosynthetic process;GO:0009069//serine family amino acid metabolic process;GO:0006790//sulfur compound metabolic process;GO:0019752//carboxylic acid metabolic process;GO:1901576//organic substance biosynthetic process;GO:0009070//serine family amino acid biosynthetic process;GO:0019344//cysteine biosynthetic process;GO:00442…
3638515	3638515	XM_714798.1	Known_gene	1	1615420	1615779	NC_032091.1	+	360	360	16.58	12.6	23.04	14.34	16.99	18.02	17.406	16.45	0.049447	0.913924	0.87547	0.209399	0.52326	0.492408	-0.431262	0.155698	0.136531	0.354542	0.195864	0.172466	K11368//enhancer of yellow 2 transcription factor	XP_719891.1|6.4e-60|hypothetical protein CAALFM_C307050WA [Candida albicans SC5314]	GO:0006139//nucleobase-containing compound metabolic process;GO:0080090//regulation of primary metabolic process;GO:0051179//localization;GO:0051173//positive regulation of nitrogen compound metabolic process;GO:0097659//nucleic acid-templated transcription;GO:0031326//regulation of cellular biosynthetic process;GO:0046907//intracellular transport;GO:0044267//cellular protein metabolic process;GO…
3642134	3642134	XM_711161.1	Known_gene	1	1828604	1830001	NC_032096.1	+	1398	1398	85.06	76.2	78.13	86.64	70.55	98.43	79.796	85.206	-0.104075	0.67373	0.58174	-0.0265524	0.584783	0.553908	0.111145	0.0490905	0.0411312	-0.333221	2.51844e-11	1.3444e-11	K03114//mitosis inhibitor protein kinase SWE1 [EC:2.7.11.1]+ko04011//MAPK signaling pathway - yeast+ko04113//Meiosis - yeast+ko04111//Cell cycle - yeast;K06649//regulatory protein SWI4+ko04011//MAPK signaling pathway - yeast+ko04113//Meiosis - yeast+ko04111//Cell cycle - yeast;K09184//GATA-binding protein, other eukaryote	XP_716254.1|7.8e-263|hypothetical protein CAALFM_CR08470WA [Candida albicans SC5314]	GO:0009987//cellular process;GO:0043170//macromolecule metabolic process;GO:0042221//response to chemical;GO:1901566//organonitrogen compound biosynthetic process;GO:0006950//response to stress;GO:0070085//glycosylation;GO:0050896//response to stimulus;GO:0062197//cellular response to chemical stress;GO:0006979//response to oxidative stress;GO:0051716//cellular response to stimulus;GO:0033554//ce…
3639345	3639345	BGI_novel_T000003,XM_713893.1	Known_gene	2	155443	157689	NC_032089.1	+	2247	2222	13.86	23.53	23.33	17.5	18.98	19.84	20.24	18.773	0.787543	0.00571991	0.00220311	-0.336428	0.00394149	0.00299288	0.310021	3.55762e-33	1.2741e-33	0.233774	4.04238e-22	1.66221e-22	K07432//beta-1,4-N-acetylglucosaminyltransferase [EC:2.4.1.141]+ko01100//Metabolic pathways+ko00513//Various types of N-glycan biosynthesis+ko00510//N-Glycan biosynthesis	XP_718986.1|3.4e-194|hypothetical protein CAALFM_C100820WA [Candida albicans SC5314]	NA
3646525	PGA49	XM_706759.2	Known_gene	1	1312804	1315008	NC_032092.1	-	2205	2205	19.47	15.79	15.19	20.11	24.24	22.39	16.816	22.246	-0.405604	0.0693824	0.0368778	-0.0466602	0.581177	0.550008	-0.618379	1.00953e-13	5.23202e-14	-0.559733	7.45027e-11	4.03794e-11	K14644//subtilase-type proteinase RRT12 [EC:3.4.21.-];K11294//nucleolin;K01183//chitinase [EC:3.2.1.14]+ko00520//Amino sugar and nucleotide sugar metabolism+ko01100//Metabolic pathways	XP_711852.2|0.0e+00|Pga49p [Candida albicans SC5314]	GO:0005886//plasma membrane;GO:0071944//cell periphery;GO:0031225//anchored component of membrane;GO:0110165//cellular anatomical entity;GO:0016020//membrane;GO:0031224//intrinsic component of membrane;
3643755	TAC1	XM_709512.2	Known_gene	1	416400	419345	NC_032093.1	-	2946	2946	17.02	9.75	8.39	26.8	23.88	20.75	11.72	23.81	-1.00341	0.00228955	0.000793898	-0.655002	9.1767e-22	3.68352e-22	-1.29233	2.61862e-58	7.05434e-59	-1.30637	3.11347e-51	8.4762e-52	K21641//glucose transport transcription regulator RGT1	XP_714605.2|0.0e+00|Tac1p [Candida albicans SC5314]	GO:0051716//cellular response to stimulus;GO:0042221//response to chemical;GO:0062197//cellular response to chemical stress;GO:0036180//filamentous growth of a population of unicellular organisms in response to biotic stimulus;GO:0016070//RNA metabolic process;GO:0006357//regulation of transcription by RNA polymerase II;GO:0046483//heterocycle metabolic process;GO:0097659//nucleic acid-templated …
3644922	3644922	XM_708316.1	Known_gene	1	544683	546848	NC_032096.1	+	2166	2166	45.01	39.88	34.74	49.49	49.51	54	39.876	51	-0.356569	0.0974723	0.05505	-0.136891	0.0120766	0.00951002	-0.312055	2.36368e-08	1.44699e-08	-0.636362	1.1228e-29	4.04446e-30	K10273//F-box and leucine-rich repeat protein 7	XP_713409.1|0.0e+00|hypothetical protein CAALFM_CR02460WA [Candida albicans SC5314]	NA
30514987	30514987	XM_019475099.1	Known_gene	1	946251	946439	NC_032089.1	+	189	189	176.41	209.45	371.44	899.66	1009.42	627.57	252.433	845.55	-1.73573	5.32846e-08	7.90691e-09	-2.35045	4.88967e-126	7.00386e-127	-2.26885	3.33659e-134	5.54336e-135	-0.756647	8.07979e-18	3.65758e-18	NA	XP_019330644.1|1.2e-25|hypothetical protein CAALFM_C104590WA [Candida albicans SC5314]	GO:0031224//intrinsic component of membrane;GO:0110165//cellular anatomical entity;GO:0016021//integral component of membrane;GO:0016020//membrane;
3646834	3646834	XM_706482.2	Known_gene	1	2761699	2764434	NC_032089.1	-	2736	2736	8.79	8.59	10.95	10.16	10.19	12.63	9.443	10.993	-0.2302	0.299526	0.210908	-0.208965	0.0562472	0.0468508	-0.246424	0.0251261	0.0205242	-0.205924	0.0345848	0.0284192	K12855//pre-mRNA-processing factor 6+ko03040//Spliceosome	XP_711574.2|0.0e+00|U4/U6-U5 snRNP complex subunit [Candida albicans SC5314]	GO:0022613//ribonucleoprotein complex biogenesis;GO:0006725//cellular aromatic compound metabolic process;GO:0016043//cellular component organization;GO:0016070//RNA metabolic process;GO:0046483//heterocycle metabolic process;GO:0071826//ribonucleoprotein complex subunit organization;GO:0071840//cellular component organization or biogenesis;GO:0043170//macromolecule metabolic process;GO:0022618//…
30515386	RPL28	XM_019475522.1	Known_gene	1	692731	693531	NC_032096.1	-	801	450	2064.17	3298.15	3339.25	1970.94	1805.06	1683.35	2900.52	1819.78	0.635951	0.0132963	0.00568957	0.0666779	0.0125419	0.00989522	0.86961	0	0	0.988189	0	0	K02900//large subunit ribosomal protein L27Ae+ko03010//Ribosome	XP_002421866.1|1.9e-82|60S ribosomal protein L28 [Candida dubliniensis CD36]	GO:0009058//biosynthetic process;GO:0009987//cellular process;GO:0010467//gene expression;GO:1901576//organic substance biosynthetic process;GO:0044271//cellular nitrogen compound biosynthetic process;GO:0006807//nitrogen compound metabolic process;GO:0008152//metabolic process;GO:0006518//peptide metabolic process;GO:0044267//cellular protein metabolic process;GO:0044237//cellular metabolic proc…
3637379	3637379	XM_715842.2	Known_gene	1	862515	863651	NC_032090.1	+	1137	1137	34.11	24.89	16.23	35.49	57.88	51.69	25.076	48.353	-0.913047	0.00771394	0.00309558	-0.0572178	0.52235	0.491204	-1.2175	3.94282e-46	1.20619e-46	-1.67122	1.64316e-65	3.92038e-66	NA	XP_720935.2|2.7e-213|hypothetical protein CAALFM_C204100WA, partial [Candida albicans SC5314]	GO:0031224//intrinsic component of membrane;GO:0005622//intracellular;GO:0005737//cytoplasm;GO:0005739//mitochondrion;GO:0110165//cellular anatomical entity;GO:0043227//membrane-bounded organelle;GO:0043226//organelle;GO:0016020//membrane;GO:0016021//integral component of membrane;GO:0043231//intracellular membrane-bounded organelle;GO:0043229//intracellular organelle;
3648086	GDH3	XM_705219.2	Known_gene	1	1362406	1363776	NC_032092.1	+	1371	1371	5434.09	1062.38	944.99	2771.95	2220.8	2749.75	2480.49	2580.83	-0.0489172	0.961566	0.940423	0.971137	0	0	-1.06378	0	0	-1.54093	0	0	K00262//glutamate dehydrogenase (NADP+) [EC:1.4.1.4]+ko00250//Alanine, aspartate and glutamate metabolism+ko00910//Nitrogen metabolism+ko00220//Arginine biosynthesis+ko01100//Metabolic pathways	XP_710311.1|1.2e-263|glutamate dehydrogenase (NADP(+)) [Candida albicans SC5314]	GO:0044281//small molecule metabolic process;GO:1901564//organonitrogen compound metabolic process;GO:0006082//organic acid metabolic process;GO:0008152//metabolic process;GO:0009058//biosynthetic process;GO:0044249//cellular biosynthetic process;GO:0071704//organic substance metabolic process;GO:0044238//primary metabolic process;GO:0016053//organic acid biosynthetic process;GO:1901607//alpha-am…
3646972	RPS25B	XM_706324.1	Known_gene	1	793426	793743	NC_032093.1	-	318	318	3374.29	7049.41	6373.74	3894.13	4234.07	3732.02	5599.15	3953.41	0.465736	0.145298	0.0881021	-0.206717	2.56993e-28	9.09576e-29	0.735457	0	0	0.772183	0	0	K02975//small subunit ribosomal protein S25e+ko03010//Ribosome	XP_711416.1|8.2e-51|ribosomal 40S subunit protein S25B [Candida albicans SC5314]	GO:0043229//intracellular organelle;GO:0032991//protein-containing complex;GO:0043232//intracellular non-membrane-bounded organelle;GO:0044391//ribosomal subunit;GO:0005840//ribosome;GO:0022626//cytosolic ribosome;GO:0022627//cytosolic small ribosomal subunit;GO:0005622//intracellular;GO:0005737//cytoplasm;GO:1990904//ribonucleoprotein complex;GO:0043228//non-membrane-bounded organelle;GO:0043226…
3647229	3647229	XM_706073.2	Known_gene	1	839331	840098	NC_032093.1	-	768	768	6.89	6.45	7.81	13.65	13.01	19.72	7.05	15.46	-1.12171	9.65047e-05	2.46197e-05	-0.986325	4.7347e-06	3.03292e-06	-1.01225	5.20467e-06	3.47788e-06	-1.33627	1.60685e-12	8.28054e-13	NA	XP_711165.2|1.7e-139|hypothetical protein CAALFM_C503810CA [Candida albicans SC5314]	NA
3635723	3635723	XM_717398.1	Known_gene	1	237215	239071	NC_032090.1	-	1857	1857	224.97	195.33	191.57	191.59	174.69	171.35	203.956	179.21	0.172604	0.421914	0.324248	0.23171	2.98519e-16	1.36034e-16	0.161117	6.55795e-08	4.09448e-08	0.160925	1.75233e-07	1.07528e-07	K01183//chitinase [EC:3.2.1.14]+ko00520//Amino sugar and nucleotide sugar metabolism+ko01100//Metabolic pathways	XP_722491.1|0.0e+00|hypothetical protein CAALFM_C201370CA [Candida albicans SC5314]	NA
3635692	3635692	XM_717545.1	Known_gene	1	443684	444265	NC_032092.1	-	582	582	4.12	1.48	1.06	0.29	0.3	0.43	2.22	0.34	2.17805	0.00652268	0.00256546	3.82852	6.52682e-07	4.02328e-07	2.30256	0.0274676	0.0225056	1.30166	0.223809	0.198378	NA	XP_722638.1|3.5e-108|hypothetical protein CAALFM_C402240CA [Candida albicans SC5314]	GO:1901135//carbohydrate derivative metabolic process;GO:0044237//cellular metabolic process;GO:0019538//protein metabolic process;GO:0006458//'de novo' protein folding;GO:0044260//cellular macromolecule metabolic process;GO:0043170//macromolecule metabolic process;GO:0071704//organic substance metabolic process;GO:0097502//mannosylation;GO:0006457//protein folding;GO:0036211//protein modificatio…
3636971	3636971	XM_716272.2	Known_gene	1	413292	416609	NC_032095.1	-	3318	3318	262.76	166.67	175.81	74.1	102.43	103.27	201.746	93.266	1.0926	2.12385e-05	4.77893e-06	1.8262	0	0	0.702356	3.63943e-164	5.1116e-165	0.767596	5.99248e-200	7.0488e-201	NA	XP_721365.1|0.0e+00|pheromone-regulated protein [Candida albicans SC5314]	GO:0016020//membrane;GO:0031224//intrinsic component of membrane;GO:0110165//cellular anatomical entity;GO:0016021//integral component of membrane;
30515082	RPL38	XM_019475189.1	Known_gene	1	28553	28789	NC_032090.1	+	237	237	1492.93	2796.25	2946.33	1930.72	1900.49	1515.21	2411.84	1782.14	0.392981	0.225904	0.149187	-0.370992	8.11457e-24	3.12338e-24	0.557122	1.56728e-62	4.0757e-63	0.959401	8.87069e-165	1.2001e-165	K02923//large subunit ribosomal protein L38e+ko03010//Ribosome	XP_002417998.1|1.4e-34|60S ribosomal protein L38 [Candida dubliniensis CD36]	GO:0044271//cellular nitrogen compound biosynthetic process;GO:0006807//nitrogen compound metabolic process;GO:0044249//cellular biosynthetic process;GO:0006412//translation;GO:0016070//RNA metabolic process;GO:0043043//peptide biosynthetic process;GO:0006518//peptide metabolic process;GO:0009987//cellular process;GO:0043170//macromolecule metabolic process;GO:0010467//gene expression;GO:0044085/…
3645628	3645628	XM_707639.1	Known_gene	1	804528	805997	NC_032091.1	-	1470	1470	47.73	57.31	65.89	51.96	59.44	60.93	56.976	57.443	-0.0253141	0.919472	0.884304	-0.122505	0.061031	0.0510794	-0.0526472	0.400655	0.371516	0.112907	0.0665662	0.056141	K14399//polyribonucleotide 5'-hydroxyl-kinase [EC:2.7.1.78]+ko03015//mRNA surveillance pathway	XP_712732.1|1.4e-275|cleavage polyadenylation factor subunit [Candida albicans SC5314]	GO:0000394//RNA splicing, via endonucleolytic cleavage and ligation;GO:0006397//mRNA processing;GO:0006399//tRNA metabolic process;GO:0031123//RNA 3'-end processing;GO:0006396//RNA processing;GO:0043170//macromolecule metabolic process;GO:0009987//cellular process;GO:0044237//cellular metabolic process;GO:1901360//organic cyclic compound metabolic process;GO:0008152//metabolic process;GO:0042493/…
3640271	3640271	XM_704922.2	Known_gene	1	863059	864597	NC_032094.1	-	1539	1539	13.15	9.89	10.64	18.23	17.09	15.4	11.226	16.906	-0.596565	0.014151	0.00611176	-0.471252	3.83674e-05	2.5689e-05	-0.78911	2.42021e-10	1.3843e-10	-0.533432	2.32721e-05	1.57538e-05	K01183//chitinase [EC:3.2.1.14]+ko00520//Amino sugar and nucleotide sugar metabolism+ko01100//Metabolic pathways;K19898//alpha-agglutinin	XP_710014.2|6.5e-287|hypothetical protein CAALFM_C603990CA [Candida albicans SC5314]	GO:0007154//cell communication;GO:0040007//growth;GO:0031667//response to nutrient levels;GO:0009987//cellular process;GO:0044182//filamentous growth of a population of unicellular organisms;GO:0009267//cellular response to starvation;GO:0051716//cellular response to stimulus;GO:0050896//response to stimulus;GO:0031668//cellular response to extracellular stimulus;GO:0006950//response to stress;GO…
3638353	3638353	XM_714940.1	Known_gene	1	718781	721924	NC_032091.1	-	3144	3144	64.81	48.05	66.05	154.41	179.68	193.08	59.636	175.723	-1.55705	1.54603e-17	7.58487e-19	-1.25248	0	0	-1.90282	0	0	-1.54757	0	0	K01228//mannosyl-oligosaccharide glucosidase [EC:3.2.1.106]+ko04141//Protein processing in endoplasmic reticulum+ko01100//Metabolic pathways+ko00510//N-Glycan biosynthesis	XP_720033.1|0.0e+00|hypothetical protein CAALFM_C303410CA [Candida albicans SC5314]	GO:0071704//organic substance metabolic process;GO:0008152//metabolic process;GO:0044238//primary metabolic process;GO:0009311//oligosaccharide metabolic process;GO:0005975//carbohydrate metabolic process;GO:0015926//glucosidase activity;GO:0004553//hydrolase activity, hydrolyzing O-glycosyl compounds;GO:0016787//hydrolase activity;GO:0004573//mannosyl-oligosaccharide glucosidase activity;GO:0016…
3643919	MSU1	XM_709373.2	Known_gene	1	1728216	1731656	NC_032090.1	-	3441	3441	39.94	30.14	49.6	30.69	32.42	31.83	39.893	31.646	0.308998	0.184065	0.116353	0.380066	1.64033e-14	7.79456e-15	-0.105205	0.048866	0.0409268	0.639953	1.17867e-43	3.48378e-44	K19782//exoribonuclease II, mitochondrial [EC:3.1.13.1]	XP_714466.2|0.0e+00|Msu1p [Candida albicans SC5314]	GO:0006401//RNA catabolic process;GO:0090304//nucleic acid metabolic process;GO:0034655//nucleobase-containing compound catabolic process;GO:0044265//cellular macromolecule catabolic process;GO:0065007//biological regulation;GO:0044238//primary metabolic process;GO:0044237//cellular metabolic process;GO:0006402//mRNA catabolic process;GO:0071704//organic substance metabolic process;GO:0050789//re…
3639222	3639222	XM_714005.2	Known_gene	1	537774	538826	NC_032094.1	-	1053	1053	76.4	68.84	68.28	71.73	82.2	83.43	71.173	79.12	-0.160586	0.415339	0.318152	0.090996	0.197659	0.174647	-0.255891	6.85545e-05	4.81654e-05	-0.289103	4.48113e-06	2.92968e-06	K13333//lysophospholipase [EC:3.1.1.5]+ko00564//Glycerophospholipid metabolism	XP_719098.2|6.2e-196|hypothetical protein CAALFM_C602640CA [Candida albicans SC5314]	GO:0007017//microtubule-based process;GO:0007010//cytoskeleton organization;GO:0051179//localization;GO:0007059//chromosome segregation;GO:0051276//chromosome organization;GO:0016192//vesicle-mediated transport;GO:0000022//mitotic spindle elongation;GO:0000278//mitotic cell cycle;GO:0009987//cellular process;GO:0016043//cellular component organization;GO:1903047//mitotic cell cycle process;GO:005…
3639550	3639550	XM_713758.2	Known_gene	1	1380391	1381107	NC_032089.1	+	717	717	19.89	14.84	19.55	22.86	28.09	32.15	18.093	27.7	-0.618856	0.0128519	0.00547804	-0.200782	0.186885	0.164536	-0.920566	2.38623e-09	1.41423e-09	-0.71765	2.08808e-07	1.28722e-07	NA	XP_718851.1|1.5e-132|hypothetical protein CAALFM_C106500WA [Candida albicans SC5314]	NA
BGI_novel_G000017	BGI_novel_G000017	BGI_novel_T000223	Novel_gene	1	584984	586173	NC_032095.1	+	1190	1190	24.52	17.11	16.27	21.94	22.1	23.23	19.3	22.423	-0.221879	0.438829	0.339795	0.160395	0.168222	0.147265	-0.369207	0.00181314	0.00137883	-0.513775	1.28539e-05	8.59426e-06	K11244//cell wall integrity and stress response component+ko04011//MAPK signaling pathway - yeast+ko04139//Mitophagy - yeast;K01183//chitinase [EC:3.2.1.14]+ko00520//Amino sugar and nucleotide sugar metabolism+ko01100//Metabolic pathways;K11294//nucleolin	NA	NA
3642125	PRP8	XM_711186.1	Known_gene	1	1864316	1871566	NC_032096.1	+	7251	7251	52.83	63.19	60.05	59.3	50.24	52.16	58.69	53.9	0.10893	0.639221	0.544077	-0.166675	3.64792e-10	1.98436e-10	0.33086	2.95346e-36	1.01881e-36	0.20322	2.7765e-14	1.36327e-14	K12856//pre-mRNA-processing factor 8+ko03040//Spliceosome	KHC28864.1|0.0e+00|pre-mRNA-processing factor 8 [Candida albicans Ca6]	GO:0006807//nitrogen compound metabolic process;GO:0016070//RNA metabolic process;GO:0000375//RNA splicing, via transesterification reactions;GO:0006139//nucleobase-containing compound metabolic process;GO:0016071//mRNA metabolic process;GO:0071704//organic substance metabolic process;GO:0000398//mRNA splicing, via spliceosome;GO:0044238//primary metabolic process;GO:0090304//nucleic acid metabol…
3643818	PHO13	XM_709483.2	Known_gene	1	1940851	1941816	NC_032090.1	+	966	966	23.03	37.79	40.03	20.88	25.28	23.88	33.616	23.346	0.501673	0.0788944	0.0430095	0.141393	0.296558	0.2687	0.580008	3.31102e-08	2.03908e-08	0.745279	1.7621e-12	9.0953e-13	K01101//4-nitrophenyl phosphatase [EC:3.1.3.41]	XP_714576.2|1.5e-180|Pho13p [Candida albicans SC5314]	GO:0016311//dephosphorylation;GO:0071704//organic substance metabolic process;GO:0009987//cellular process;GO:0044260//cellular macromolecule metabolic process;GO:0006793//phosphorus metabolic process;GO:0044237//cellular metabolic process;GO:0036211//protein modification process;GO:0006796//phosphate-containing compound metabolic process;GO:0006464//cellular protein modification process;GO:00081…
3645647	3645647	XM_707658.2	Known_gene	1	779861	780721	NC_032091.1	+	861	861	13.23	10.07	10.92	21.87	18.97	23.59	11.406	21.476	-0.913021	0.0002162	5.99378e-05	-0.72514	1.65498e-06	1.03919e-06	-0.913656	5.56677e-08	3.46542e-08	-1.1112	7.57822e-13	3.87118e-13	K12386//cystinosin	XP_712751.2|3.6e-162|hypothetical protein CAALFM_C303690WA [Candida albicans SC5314]	GO:0071702//organic substance transport;GO:0009987//cellular process;GO:0003333//amino acid transmembrane transport;GO:0006865//amino acid transport;GO:0015711//organic anion transport;GO:0071705//nitrogen compound transport;GO:0051234//establishment of localization;GO:0006820//anion transport;GO:0034220//ion transmembrane transport;GO:0006811//ion transport;GO:1905039//carboxylic acid transmembr…
3645351	NUP84	XM_704847.1	Known_gene	1	803672	806206	NC_032092.1	-	2535	2535	24.62	27.12	37.31	28.44	33.24	33.08	29.683	31.586	-0.106067	0.671032	0.579076	-0.208091	0.00190931	0.00142021	-0.293563	2.86543e-06	1.89849e-06	0.173603	0.00354255	0.00271328	K14301//nuclear pore complex protein Nup107+ko03013//RNA transport	XP_709939.1|0.0e+00|Nup84p [Candida albicans SC5314]	GO:0050789//regulation of biological process;GO:0033365//protein localization to organelle;GO:0000973//posttranscriptional tethering of RNA polymerase II gene DNA at nuclear periphery;GO:0065007//biological regulation;GO:0000972//transcription-dependent tethering of RNA polymerase II gene DNA at nuclear periphery;GO:0009889//regulation of biosynthetic process;GO:0071704//organic substance metabol…
3639193	3639193	XM_714047.2	Known_gene	1	617910	619601	NC_032094.1	+	1692	1692	10.1	15.97	12.84	15.9	12.93	12.53	12.97	13.786	-0.0992573	0.77232	0.697182	-0.654671	4.83076e-08	2.8217e-08	0.304642	0.00760855	0.00600308	0.0352588	0.803282	0.78401	NA	XP_719140.2|0.0e+00|hypothetical protein CAALFM_C602990WA [Candida albicans SC5314]	NA
3646843	3646843	XM_706453.1	Known_gene	1	918145	918480	NC_032092.1	-	336	336	29.92	16.36	24.68	44.83	38.91	39.21	23.653	40.983	-0.803223	0.013701	0.00590377	-0.583354	0.00247694	0.00185481	-1.24997	1.25114e-07	7.8992e-08	-0.667879	0.00128626	0.0009588	NA	XP_711545.1|8.0e-57|hypothetical protein CAALFM_C404300CA [Candida albicans SC5314]	GO:0031224//intrinsic component of membrane;GO:0110165//cellular anatomical entity;GO:0016021//integral component of membrane;GO:0016020//membrane;
3637896	3637896	XM_019475369.1	Known_gene	1	586325	588797	NC_032092.1	+	2473	2409	2.9	3.21	2.98	0.93	0.29	0.4	3.03	0.54	2.32972	1.37512e-07	2.15656e-08	1.64075	2.84311e-09	1.58777e-09	3.46845	1.36521e-22	5.80698e-23	2.89724	5.76396e-18	2.60444e-18	K08741//DNA mismatch repair protein MSH5	XP_019330914.1|0.0e+00|MutS family protein [Candida albicans SC5314]	GO:0007049//cell cycle;GO:1903046//meiotic cell cycle process;GO:0006996//organelle organization;GO:0046483//heterocycle metabolic process;GO:0006281//DNA repair;GO:0007127//meiosis I;GO:0050896//response to stimulus;GO:0034641//cellular nitrogen compound metabolic process;GO:0000280//nuclear division;GO:0009987//cellular process;GO:0048285//organelle fission;GO:0016043//cellular component organi…
3647257	GLC7	XM_706050.2	Known_gene	1	1660822	1661814	NC_032096.1	+	993	993	190.7	163.14	148.94	176.76	193.42	184.48	167.593	184.886	-0.148992	0.508027	0.408754	0.109513	0.0153685	0.0122124	-0.245626	1.11255e-08	6.72542e-09	-0.308733	1.62713e-12	8.38778e-13	K06269//serine/threonine-protein phosphatase PP1 catalytic subunit [EC:3.1.3.16]+ko04113//Meiosis - yeast+ko03015//mRNA surveillance pathway	XP_711142.1|2.4e-194|type 1 serine/threonine-protein phosphatase catalytic subunit [Candida albicans SC5314]	GO:0016570//histone modification;GO:0051276//chromosome organization;GO:0032956//regulation of actin cytoskeleton organization;GO:0031326//regulation of cellular biosynthetic process;GO:1905819//negative regulation of chromosome separation;GO:0050794//regulation of cellular process;GO:0006470//protein dephosphorylation;GO:0045814//negative regulation of gene expression, epigenetic;GO:0051246//reg…
3643501	3643501	XM_709759.2	Known_gene	1	1443720	1444874	NC_032090.1	+	1155	1155	63.15	60.26	71.02	30.28	27.95	40.85	64.81	33.026	0.950011	4.78499e-06	9.63682e-07	1.06042	7.80972e-41	2.31664e-41	1.10835	3.34989e-42	1.07174e-42	0.797889	1.01519e-28	3.71774e-29	K00344//NADPH2:quinone reductase [EC:1.6.5.5]	XP_714852.1|3.4e-216|NADPH:quinone reductase [Candida albicans SC5314]	GO:0033554//cellular response to stress;GO:0051716//cellular response to stimulus;GO:0050896//response to stimulus;GO:0062197//cellular response to chemical stress;GO:0006979//response to oxidative stress;GO:0034599//cellular response to oxidative stress;GO:0009987//cellular process;GO:0070887//cellular response to chemical stimulus;GO:0042221//response to chemical;GO:0006950//response to stress;…
3645981	CST5	XM_707309.2	Known_gene	1	987663	988814	NC_032094.1	+	1152	1152	33.74	24.53	21.72	33.52	35.93	42.17	26.663	37.206	-0.476367	0.0778285	0.0423378	0.00943782	0.956647	0.950114	-0.550642	1.2403e-08	7.51422e-09	-0.957193	7.69273e-24	3.05556e-24	K11239//pheromone-response scaffold protein+ko04011//MAPK signaling pathway - yeast	XP_712402.2|6.7e-220|Cst5p [Candida albicans SC5314]	GO:0050794//regulation of cellular process;GO:0023052//signaling;GO:0051703//intraspecies interaction between organisms;GO:0090605//submerged biofilm formation;GO:0050896//response to stimulus;GO:0031139//positive regulation of conjugation with cellular fusion;GO:0000750//pheromone-dependent signal transduction involved in conjugation with cellular fusion;GO:1900190//regulation of single-species …
3638953	3638953	XM_714282.1	Known_gene	1	2215084	2216109	NC_032096.1	-	1026	1026	11.16	10.94	12.09	7.69	4.88	5.86	11.396	6.143	0.850378	0.00401915	0.00147919	0.537282	0.00470182	0.00359058	1.16466	2.49136e-08	1.52598e-08	1.04484	9.76189e-08	5.92024e-08	NA	XP_719375.1|3.2e-197|hypothetical protein CAALFM_CR10380CA [Candida albicans SC5314]	NA
3644539	GIN1	XM_708699.2	Known_gene	1	2508110	2511814	NC_032089.1	-	3705	3705	3.05	6.81	9.44	11.11	8.77	10.91	6.433	10.263	-0.675088	0.0886243	0.0493749	-1.86498	3.31399e-58	8.0366e-59	-0.364922	0.000354614	0.00025938	-0.208792	0.0198276	0.0159988	K11272//mediator of replication checkpoint protein 1+ko04111//Cell cycle - yeast	XP_713792.1|0.0e+00|chromatin-modulating protein [Candida albicans SC5314]	GO:0048523//negative regulation of cellular process;GO:0031570//DNA integrity checkpoint;GO:0065007//biological regulation;GO:0000075//cell cycle checkpoint;GO:0050896//response to stimulus;GO:0006950//response to stress;GO:0050789//regulation of biological process;GO:0048519//negative regulation of biological process;GO:0045786//negative regulation of cell cycle;GO:0006974//cellular response to …
BGI_novel_G000004	BGI_novel_G000004	BGI_novel_T000052	Novel_gene	1	990336	990878	NC_032090.1	-	543	543	8.18	9.55	10.45	11.27	17.64	12.41	9.393	13.773	-0.552368	0.108372	0.0622875	-0.462315	0.0905076	0.0770762	-0.885278	0.000148434	0.000106219	-0.248	0.317077	0.28707	NA	NA	NA
3641548	MRP17	XM_711693.1	Known_gene	1	77777	78136	NC_032093.1	-	360	360	35.58	34	66.11	82.41	83.2	73.21	45.23	79.606	-0.836294	0.00673238	0.00265914	-1.21175	6.13222e-16	2.81894e-16	-1.29105	3.26284e-17	1.55332e-17	-0.147172	0.228263	0.202554	K02990//small subunit ribosomal protein S6+ko03010//Ribosome	XP_002420349.1|4.9e-60|mitochondrial 37S ribosomal protein YmS16 [Candida dubliniensis CD36]	GO:0019538//protein metabolic process;GO:0044249//cellular biosynthetic process;GO:0034645//cellular macromolecule biosynthetic process;GO:0071704//organic substance metabolic process;GO:0044267//cellular protein metabolic process;GO:0009987//cellular process;GO:0006412//translation;GO:0043043//peptide biosynthetic process;GO:0043170//macromolecule metabolic process;GO:0008152//metabolic process;…
3642076	3642076	XM_711143.2	Known_gene	1	1796429	1800589	NC_032096.1	-	4161	4161	28.05	28.79	36.83	42.89	40.84	46.65	31.223	43.46	-0.489416	0.00640022	0.00250694	-0.612641	7.91436e-43	2.28968e-43	-0.504415	2.5883e-29	9.77036e-30	-0.340996	8.10035e-17	3.75866e-17	K14676//lysophospholipid hydrolase [EC:3.1.1.5]+ko00564//Glycerophospholipid metabolism	XP_716236.1|0.0e+00|lysophospholipase [Candida albicans SC5314]	GO:0044238//primary metabolic process;GO:0044419//interspecies interaction between organisms;GO:0071704//organic substance metabolic process;GO:1901575//organic substance catabolic process;GO:0008152//metabolic process;GO:0009405//pathogenesis;GO:0009056//catabolic process;GO:0016042//lipid catabolic process;GO:0006629//lipid metabolic process;GO:0042175//nuclear outer membrane-endoplasmic reticu…
3645320	3645320	XM_707922.2	Known_gene	1	2564631	2565422	NC_032089.1	-	792	792	1.55	3.91	2.37	0.1	0.1	0	2.61	0.066	3.98041	4.56835e-07	7.757e-08	3.9542	0.000250156	0.000176117	5.2891	6.84799e-11	3.85178e-11	7.88874	1.12296e-07	6.83652e-08	NA	XP_713015.2|1.2e-154|hypothetical protein CAALFM_C111710CA [Candida albicans SC5314]	GO:0071852//fungal-type cell wall organization or biogenesis;GO:0016043//cellular component organization;GO:0071555//cell wall organization;GO:0071554//cell wall organization or biogenesis;GO:0031505//fungal-type cell wall organization;GO:0009987//cellular process;GO:0045229//external encapsulating structure organization;GO:0071840//cellular component organization or biogenesis;GO:0110165//cellul…
3647141	NHX1	XM_706161.1	Known_gene	1	103938	105929	NC_032094.1	-	1992	1992	97.54	80.69	70.88	86.11	85.61	90.82	83.036	87.513	-0.0805705	0.757735	0.679101	0.179813	1.51975e-05	9.96294e-06	-0.0853894	0.0507107	0.042531	-0.357631	1.18421e-16	5.51264e-17	K12041//solute carrier family 9 (sodium/hydrogen exchanger), member 6/7	XP_711253.1|0.0e+00|bifunctional K:H/Na:H antiporter [Candida albicans SC5314]	GO:0098660//inorganic ion transmembrane transport;GO:0034220//ion transmembrane transport;GO:0051179//localization;GO:0050801//ion homeostasis;GO:0098655//cation transmembrane transport;GO:0030003//cellular cation homeostasis;GO:0006812//cation transport;GO:0009987//cellular process;GO:0006811//ion transport;GO:0051452//intracellular pH reduction;GO:0045851//pH reduction;GO:0006813//potassium ion…
3634929	RTG1	XM_718316.1	Known_gene	1	1889477	1890301	NC_032089.1	+	825	825	69.58	76.76	86.99	70.03	75.73	79.49	77.776	75.083	0.0349004	0.875732	0.825341	-0.00930041	0.85617	0.839914	0.0194898	0.806287	0.789744	0.130076	0.0899014	0.0766304	NA	XP_723409.1|1.1e-150|Rtg1p [Candida albicans SC5314]	GO:0071704//organic substance metabolic process;GO:2001141//regulation of RNA biosynthetic process;GO:0031669//cellular response to nutrient levels;GO:0051716//cellular response to stimulus;GO:1901575//organic substance catabolic process;GO:1902680//positive regulation of RNA biosynthetic process;GO:0044419//interspecies interaction between organisms;GO:0031670//cellular response to nutrient;GO:0…
3643751	3643751	XM_709508.2	Known_gene	1	427195	427842	NC_032093.1	-	648	648	102.77	80.86	87.92	65.05	84.85	84.9	90.516	78.266	0.196943	0.400776	0.303664	0.659798	1.65412e-15	7.70582e-16	-0.0694885	0.413035	0.383892	0.0504268	0.6363	0.607994	NA	XP_714601.2|3.0e-116|hypothetical protein CAALFM_C501880CA [Candida albicans SC5314]	GO:0051179//localization;GO:0008104//protein localization;GO:0042886//amide transport;GO:0033036//macromolecule localization;GO:0009987//cellular process;GO:0015031//protein transport;GO:0051234//establishment of localization;GO:0016192//vesicle-mediated transport;GO:0015833//peptide transport;GO:0071705//nitrogen compound transport;GO:0045184//establishment of protein localization;GO:0071702//or…
3640116	IFU5	XM_713141.1	Known_gene	1	395478	396188	NC_032096.1	+	711	711	1406.56	814.58	591.85	472.25	511.73	386.55	937.663	456.843	0.998681	0.0045099	0.00168306	1.57455	0	0	0.670674	1.24092e-133	2.06992e-134	0.614577	2.2532e-81	4.75642e-82	K17095//annexin A7/11	XP_718234.1|8.8e-146|Ifu5p [Candida albicans SC5314]	GO:0071554//cell wall organization or biogenesis;GO:0044182//filamentous growth of a population of unicellular organisms;GO:0009987//cellular process;GO:0030447//filamentous growth;GO:0071852//fungal-type cell wall organization or biogenesis;GO:0040007//growth;GO:0042710//biofilm formation;GO:0051703//intraspecies interaction between organisms;GO:0098743//cell aggregation;GO:0044010//single-speci…
3638814	CDH1	XM_714437.1	Known_gene	1	66331	68124	NC_032090.1	-	1794	1794	42.39	35.48	33.58	41.05	42.94	42.41	37.15	42.133	-0.188074	0.396506	0.299374	0.0463417	0.520573	0.489186	-0.275316	3.2446e-05	2.24984e-05	-0.336802	4.98879e-07	3.11862e-07	K03364//cell division cycle 20-like protein 1, cofactor of APC complex+ko04120//Ubiquitin mediated proteolysis+ko04111//Cell cycle - yeast	XP_719530.1|0.0e+00|Cdh1p [Candida albicans SC5314]	GO:0033047//regulation of mitotic sister chromatid segregation;GO:0051443//positive regulation of ubiquitin-protein transferase activity;GO:1901990//regulation of mitotic cell cycle phase transition;GO:0045839//negative regulation of mitotic nuclear division;GO:0065009//regulation of molecular function;GO:0051130//positive regulation of cellular component organization;GO:0080090//regulation of pr…
3640236	3640236	XM_713058.2	Known_gene	1	272374	274197	NC_032089.1	-	1824	1824	36.96	34.18	49.16	138.86	108.82	100.02	40.1	115.9	-1.53681	4.03516e-11	4.00631e-12	-1.90959	0	0	-1.67072	1.10133e-229	1.22717e-230	-1.02473	8.78466e-100	1.65975e-100	K19815//high-osmolarity-induced transcription protein 1+ko04011//MAPK signaling pathway - yeast	XP_718151.2|0.0e+00|hypothetical protein CAALFM_C101390CA [Candida albicans SC5314]	GO:0045935//positive regulation of nucleobase-containing compound metabolic process;GO:0010570//regulation of filamentous growth;GO:0051171//regulation of nitrogen compound metabolic process;GO:0060962//regulation of ribosomal protein gene transcription by RNA polymerase II;GO:0031323//regulation of cellular metabolic process;GO:0048518//positive regulation of biological process;GO:0065007//biolo…
3639866	3639866	XM_713388.2	Known_gene	1	1226686	1229604	NC_032089.1	+	2919	2919	48.36	30.29	30.87	51.19	50.5	45.57	36.506	49.086	-0.429646	0.12536	0.0741569	-0.0820478	0.0718789	0.0606972	-0.737442	1.99099e-48	5.92148e-49	-0.561879	1.58862e-27	5.92886e-28	NA	XP_718481.2|0.0e+00|hypothetical protein CAALFM_C105900WA [Candida albicans SC5314]	GO:0016021//integral component of membrane;GO:0110165//cellular anatomical entity;GO:0031224//intrinsic component of membrane;GO:0016020//membrane;
3636435	3636435	XM_716786.2	Known_gene	1	1058090	1058830	NC_032093.1	-	741	741	54.73	53.07	61.03	64.08	75.05	72.7	56.276	70.61	-0.340236	0.0577355	0.0299095	-0.227542	0.00962697	0.00751526	-0.499956	5.90674e-09	3.5401e-09	-0.252437	0.00208306	0.00157219	NA	XP_721879.2|1.9e-135|hypothetical protein CAALFM_C504840CA [Candida albicans SC5314]	GO:0042254//ribosome biogenesis;GO:0009987//cellular process;GO:0071840//cellular component organization or biogenesis;GO:0042274//ribosomal small subunit biogenesis;GO:0044085//cellular component biogenesis;GO:0022613//ribonucleoprotein complex biogenesis;GO:0030686//90S preribosome;GO:1990904//ribonucleoprotein complex;GO:0032991//protein-containing complex;GO:0030684//preribosome;
3642465	3642465	XM_710787.2	Known_gene	1	1101241	1102398	NC_032089.1	-	1158	1158	72.48	81.64	134.27	78.36	84.56	70.17	96.13	77.696	0.272489	0.358832	0.264067	-0.112534	0.0611546	0.051193	-0.0506992	0.399466	0.370214	0.936211	1.75124e-69	4.05276e-70	NA	XP_715880.2|7.9e-229|hypothetical protein CAALFM_C105210CA [Candida albicans SC5314]	GO:0031224//intrinsic component of membrane;GO:0016021//integral component of membrane;GO:0110165//cellular anatomical entity;GO:0016020//membrane;
3646987	3646987	XM_706339.1	Known_gene	1	813516	814376	NC_032093.1	-	861	861	36.11	63.15	75.21	58.9	53.9	56.76	58.156	56.52	0.0170518	0.968728	0.949234	-0.705869	9.77482e-15	4.62692e-15	0.228497	0.00588935	0.00461914	0.40605	2.60786e-07	1.61373e-07	K01792//glucose-6-phosphate 1-epimerase [EC:5.1.3.15]+ko00010//Glycolysis / Gluconeogenesis+ko01100//Metabolic pathways+ko01130//Biosynthesis of antibiotics+ko01110//Biosynthesis of secondary metabolites;K18622//adducin	XP_711431.1|6.4e-167|hypothetical protein CAALFM_C503670CA [Candida albicans SC5314]	GO:0030834//regulation of actin filament depolymerization;GO:0030029//actin filament-based process;GO:0031333//negative regulation of protein-containing complex assembly;GO:0048523//negative regulation of cellular process;GO:0032956//regulation of actin cytoskeleton organization;GO:1901880//negative regulation of protein depolymerization;GO:0010639//negative regulation of organelle organization;G…
3645008	OPT7	XM_708261.2	Known_gene	1	69499	71742	NC_032092.1	-	2244	2244	7.23	4.77	5.37	4.41	4.99	6.65	5.79	5.35	0.107304	0.758951	0.680696	0.713217	4.54495e-06	2.9091e-06	-0.0650505	0.711215	0.690098	-0.308432	0.0429098	0.0355246	NA	XP_713354.2|0.0e+00|Opt7p [Candida albicans SC5314]	GO:0051234//establishment of localization;GO:0006857//oligopeptide transport;GO:0042886//amide transport;GO:0015711//organic anion transport;GO:0035672//oligopeptide transmembrane transport;GO:0034220//ion transmembrane transport;GO:0071702//organic substance transport;GO:0042939//tripeptide transport;GO:0072337//modified amino acid transport;GO:0051179//localization;GO:0055085//transmembrane tra…
3636162	3636162	XM_717064.1	Known_gene	1	2879441	2880202	NC_032089.1	+	762	762	1.3	1.16	1.51	1.53	1.89	1.13	1.323	1.516	-0.199278	0.77156	0.696239	-0.23502	0.707539	0.680788	-0.704261	0.223404	0.200076	0.418226	0.512333	0.48092	NA	XP_722157.1|2.4e-141|hypothetical protein CAALFM_C113180WA [Candida albicans SC5314]	NA
3641726	CHS4	XM_711497.1	Known_gene	1	1275033	1277288	NC_032091.1	+	2256	2256	118.55	92.93	95.91	189.49	140.59	147.62	102.463	159.233	-0.643283	0.00754802	0.00301896	-0.676626	1.27566e-116	1.94833e-117	-0.597278	4.31651e-70	1.05051e-70	-0.622135	6.94728e-79	1.50011e-79	K07126//uncharacterized protein	XP_716590.1|0.0e+00|Chs4p [Candida albicans SC5314]	GO:0006022//aminoglycan metabolic process;GO:0009059//macromolecule biosynthetic process;GO:0009987//cellular process;GO:0071554//cell wall organization or biogenesis;GO:0046349//amino sugar biosynthetic process;GO:0006037//cell wall chitin metabolic process;GO:0071840//cellular component organization or biogenesis;GO:1901071//glucosamine-containing compound metabolic process;GO:0043170//macromol…
3641808	CGT1	XM_711476.2	Known_gene	1	1270621	1271970	NC_032092.1	+	1350	1350	31.88	31.68	35.42	49.17	43.49	48.18	32.993	46.946	-0.520915	0.00369966	0.00135028	-0.625127	2.35881e-16	1.06901e-16	-0.457111	7.29483e-09	4.3842e-09	-0.44387	2.61473e-09	1.49382e-09	K00987//mRNA guanylyltransferase [EC:2.7.7.50]	XP_716569.2|2.5e-266|mRNA guanylyltransferase [Candida albicans SC5314]	GO:0006370//7-methylguanosine mRNA capping;GO:0006397//mRNA processing;GO:0006139//nucleobase-containing compound metabolic process;GO:0046483//heterocycle metabolic process;GO:0034641//cellular nitrogen compound metabolic process;GO:0016070//RNA metabolic process;GO:0043170//macromolecule metabolic process;GO:0006396//RNA processing;GO:0090304//nucleic acid metabolic process;GO:0009452//7-methyl…
3647972	ALS4	BGI_novel_T000194,BGI_novel_T000211,BGI_novel_T000203,XM_705333.2,BGI_novel_T000195,BGI_novel_T000202,BGI_novel_T000212,BGI_novel_T000196,BGI_novel_T000205,BGI_novel_T000197,BGI_novel_T000204,BGI_novel_T000209,BGI_novel_T000190,BGI_novel_T000207,BGI_novel_T000188,BGI_novel_T000189,BGI_novel_T000210,BGI_novel_T000206,BGI_novel_T000187,BGI_novel_T000192,BGI_novel_T000200,BGI_novel_T000191,BGI_novel…	Known_gene	27	898452	904754	NC_032094.1	-	6303	6303	71.51	58.91	59.04	77.41	68.87	89.66	63.153	78.646	-0.383884	0.0748547	0.0403715	-0.114375	1.32652e-11	6.88004e-12	-0.225363	1.44536e-22	6.15996e-23	-0.602772	5.53488e-111	9.83958e-112	K22493//agglutinin-like protein;K22493//agglutinin-like protein;K22493//agglutinin-like protein;K22493//agglutinin-like protein;K22493//agglutinin-like protein;K22493//agglutinin-like protein;K22493//agglutinin-like protein;K22493//agglutinin-like protein;K22493//agglutinin-like protein;K22493//agglutinin-like protein;K22493//agglutinin-like protein;K22493//agglutinin-like protein;K22493//aggluti…	XP_710425.2|0.0e+00|Als4p [Candida albicans SC5314]	GO:0022610//biological adhesion;GO:0044403//symbiotic process;GO:0090605//submerged biofilm formation;GO:0044419//interspecies interaction between organisms;GO:0098630//aggregation of unicellular organisms;GO:0090608//multi-species submerged biofilm formation;GO:0044406//adhesion of symbiont to host;GO:0009405//pathogenesis;GO:0098609//cell-cell adhesion;GO:0098743//cell aggregation;GO:0051703//i…
3636465	3636465	XM_716826.1	Known_gene	1	1137147	1138370	NC_032093.1	+	1224	1224	9	13.72	7.28	0.65	0.66	0.53	10	0.613	3.81729	5.82234e-20	2.44978e-21	3.79141	3.19536e-32	1.06175e-32	4.37767	2.55381e-53	7.17794e-54	3.77987	4.67688e-26	1.78753e-26	K01956//carbamoyl-phosphate synthase small subunit [EC:6.3.5.5]+ko00250//Alanine, aspartate and glutamate metabolism+ko01100//Metabolic pathways+ko00240//Pyrimidine metabolism	XP_721919.1|1.2e-238|hypothetical protein CAALFM_C505180WA [Candida albicans SC5314]	GO:0009056//catabolic process;GO:0008152//metabolic process;GO:0016787//hydrolase activity;GO:0003824//catalytic activity;
3642335	IFM3	XM_710924.2	Known_gene	1	1640824	1641633	NC_032090.1	-	810	810	88.93	99.37	97.49	81.1	62.63	64.73	95.263	69.486	0.430691	0.0606105	0.0316207	0.132968	0.0792672	0.0672266	0.665956	3.64605e-20	1.62445e-20	0.59082	7.04148e-16	3.34124e-16	K00015//glyoxylate reductase [EC:1.1.1.26]+ko01100//Metabolic pathways+ko01110//Biosynthesis of secondary metabolites+ko00630//Glyoxylate and dicarboxylate metabolism	XP_716017.2|1.4e-152|Ifm3p [Candida albicans SC5314]	GO:0005622//intracellular;GO:0005829//cytosol;GO:0005737//cytoplasm;GO:0110165//cellular anatomical entity;GO:0000166//nucleotide binding;GO:0005488//binding;GO:0097159//organic cyclic compound binding;GO:0036094//small molecule binding;GO:0016614//oxidoreductase activity, acting on CH-OH group of donors;GO:0016491//oxidoreductase activity;GO:0016616//oxidoreductase activity, acting on the CH-OH …
3635730	HSK3	XM_717438.1	Known_gene	1	309725	310045	NC_032090.1	+	321	321	76.02	51.11	57.82	9.78	10.57	11.81	61.65	10.72	2.43636	1.66731e-15	1.001e-16	2.95847	4.04351e-37	1.24794e-37	2.27363	3.73644e-19	1.70337e-19	2.29156	1.22827e-21	5.09768e-22	NA	XP_722531.1|5.2e-53|Hsk3p [Candida albicans SC5314]	GO:0008608//attachment of spindle microtubules to kinetochore;GO:0007017//microtubule-based process;GO:0007049//cell cycle;GO:0007051//spindle organization;GO:0022402//cell cycle process;GO:0007059//chromosome segregation;GO:1902850//microtubule cytoskeleton organization involved in mitosis;GO:1903047//mitotic cell cycle process;GO:0007010//cytoskeleton organization;GO:0016043//cellular component…
3640407	HSE1	XM_712831.1	Known_gene	1	278915	280411	NC_032096.1	-	1497	1497	265.71	163.29	144.5	132.46	149.33	144.21	191.166	142	0.41671	0.175572	0.109758	1.0043	3.69457e-204	3.69826e-205	0.128932	0.000452199	0.000333322	0.00289828	0.983342	0.981376	K04705//signal transducing adaptor molecule+ko04144//Endocytosis	XP_717924.1|1.0e-284|ESCRT-0 subunit protein [Candida albicans SC5314]	GO:0034613//cellular protein localization;GO:0006810//transport;GO:0006886//intracellular protein transport;GO:0009987//cellular process;GO:0051649//establishment of localization in cell;GO:0046907//intracellular transport;GO:0071702//organic substance transport;GO:0071705//nitrogen compound transport;GO:0045184//establishment of protein localization;GO:0015833//peptide transport;GO:0033036//macr…
3640113	SPC98	XM_713172.2	Known_gene	1	433224	435581	NC_032096.1	-	2358	2358	5.57	7.87	10.92	9.7	10.59	13.46	8.12	11.25	-0.476987	0.118018	0.069109	-0.800307	1.35094e-09	7.4702e-10	-0.428267	0.000305671	0.000222918	-0.301706	0.00340285	0.00260288	K16570//gamma-tubulin complex component 3	XP_718265.2|0.0e+00|Spc98p [Candida albicans SC5314]	GO:0031122//cytoplasmic microtubule organization;GO:0070925//organelle assembly;GO:0097435//supramolecular fiber organization;GO:0007049//cell cycle;GO:0016043//cellular component organization;GO:0000003//reproduction;GO:0022402//cell cycle process;GO:0007051//spindle organization;GO:0046785//microtubule polymerization;GO:0007010//cytoskeleton organization;GO:0006996//organelle organization;GO:00…
3637848	3637848	XM_715417.2	Known_gene	1	488934	493196	NC_032092.1	+	4263	4263	15.47	15.95	20.54	14.49	15.8	18.09	17.32	16.126	0.0889852	0.691102	0.603547	0.0944156	0.186677	0.164322	0.0136319	0.843633	0.830264	0.183244	0.00253643	0.00192705	K14401//cleavage and polyadenylation specificity factor subunit 1+ko03015//mRNA surveillance pathway	XP_720510.2|0.0e+00|hypothetical protein CAALFM_C402430WA [Candida albicans SC5314]	GO:0031123//RNA 3'-end processing;GO:0006396//RNA processing;GO:1901360//organic cyclic compound metabolic process;GO:0034641//cellular nitrogen compound metabolic process;GO:0046483//heterocycle metabolic process;GO:0042221//response to chemical;GO:0010467//gene expression;GO:0071704//organic substance metabolic process;GO:0006378//mRNA polyadenylation;GO:0009987//cellular process;GO:0090304//nu…
3644034	TOP1	XM_709212.2	Known_gene	1	186531	188873	NC_032094.1	-	2343	2343	148.59	124.25	139.71	183.78	130.22	189.33	137.516	167.776	-0.296836	0.226227	0.149702	-0.306643	8.52739e-29	2.99538e-29	-0.0677052	0.0360411	0.0298248	-0.438468	2.37923e-56	6.18394e-57	K03163//DNA topoisomerase I [EC:5.99.1.2]	XP_714305.1|0.0e+00|DNA topoisomerase 1 [Candida albicans SC5314]	GO:0071103//DNA conformation change;GO:0043170//macromolecule metabolic process;GO:0044419//interspecies interaction between organisms;GO:0006139//nucleobase-containing compound metabolic process;GO:0009987//cellular process;GO:0044238//primary metabolic process;GO:0006325//chromatin organization;GO:0044249//cellular biosynthetic process;GO:0071840//cellular component organization or biogenesis;G…
3640726	IRE1	XM_712513.2	Known_gene	1	1731592	1735263	NC_032089.1	-	3672	3672	30.81	28.24	26.97	29.14	32.64	32.55	28.673	31.443	-0.138416	0.487401	0.387862	0.0803978	0.139359	0.120906	-0.208901	5.04691e-05	3.52652e-05	-0.271302	1.67418e-07	1.02621e-07	K08852//serine/threonine-protein kinase/endoribonuclease IRE1 [EC:2.7.11.1 3.1.26.-]+ko04141//Protein processing in endoplasmic reticulum	XP_717606.2|0.0e+00|bifunctional endoribonuclease/protein kinase [Candida albicans SC5314]	GO:0034641//cellular nitrogen compound metabolic process;GO:0010467//gene expression;GO:0006950//response to stress;GO:0007165//signal transduction;GO:0065007//biological regulation;GO:0044238//primary metabolic process;GO:0012501//programmed cell death;GO:0016071//mRNA metabolic process;GO:0006139//nucleobase-containing compound metabolic process;GO:0050789//regulation of biological process;GO:0…
3638848	3638848	XM_714419.1	Known_gene	1	99682	100710	NC_032090.1	-	1029	1029	17.37	20.1	23.95	32.46	20.92	24.37	20.473	25.916	-0.359604	0.228673	0.151815	-0.902065	4.05229e-15	1.90128e-15	-0.0576874	0.66208	0.637894	-0.0250806	0.803797	0.784646	K01477//allantoicase [EC:3.5.3.4]+ko00230//Purine metabolism+ko01100//Metabolic pathways	XP_719512.1|1.4e-197|allantoicase [Candida albicans SC5314]	GO:0043603//cellular amide metabolic process;GO:1901565//organonitrogen compound catabolic process;GO:1901361//organic cyclic compound catabolic process;GO:1901564//organonitrogen compound metabolic process;GO:1901575//organic substance catabolic process;GO:0008152//metabolic process;GO:0071704//organic substance metabolic process;GO:0006807//nitrogen compound metabolic process;GO:0044237//cellul…
3641643	3641643	XM_019475451.1	Known_gene	1	266126	266865	NC_032094.1	-	740	660	6.88	5.15	7.1	9.74	9.17	11.14	6.376	10.016	-0.655725	0.0421088	0.0209669	-0.501513	0.054145	0.0450006	-0.832349	0.00344415	0.0026657	-0.649858	0.00865659	0.00680902	NA	XP_019330996.1|2.1e-117|hypothetical protein CAALFM_C601330CA [Candida albicans SC5314]	GO:0016020//membrane;GO:0016021//integral component of membrane;GO:0031224//intrinsic component of membrane;GO:0110165//cellular anatomical entity;
3643165	3643165	XM_710105.1	Known_gene	1	924629	926377	NC_032095.1	-	1749	1749	43.27	53.99	40.1	134.5	141.15	167.65	45.786	147.766	-1.6701	3.32304e-15	2.09452e-16	-1.63617	4.04496e-261	3.26076e-262	-1.38647	2.4041e-216	2.80712e-217	-2.06378	0	0	NA	XP_715198.1|0.0e+00|hypothetical protein CAALFM_C704240CA [Candida albicans SC5314]	NA
3640387	ATP3	XM_019475510.1,BGI_novel_T000229	Known_gene	2	310711	313136	NC_032096.1	+	2426	2089	761.59	915.76	1243.63	905.3	970.16	891.09	973.66	922.183	0.00806416	0.977955	0.963997	-0.249381	1.12141e-18	4.81886e-19	-0.0832531	1.01136e-16	4.87882e-17	0.480914	5.82095e-88	1.18223e-88	K02136//F-type H+-transporting ATPase subunit gamma+ko01100//Metabolic pathways+ko00190//Oxidative phosphorylation;K02136//F-type H+-transporting ATPase subunit gamma+ko01100//Metabolic pathways+ko00190//Oxidative phosphorylation	XP_019331055.1|1.1e-156|F1F0 ATP synthase subunit gamma [Candida albicans SC5314]	GO:0009259//ribonucleotide metabolic process;GO:0008152//metabolic process;GO:0006811//ion transport;GO:0009201//ribonucleoside triphosphate biosynthetic process;GO:0046483//heterocycle metabolic process;GO:0090407//organophosphate biosynthetic process;GO:0044238//primary metabolic process;GO:0006812//cation transport;GO:0009145//purine nucleoside triphosphate biosynthetic process;GO:0006753//nuc…
3639872	3639872	XM_713377.1	Known_gene	1	1257107	1259197	NC_032089.1	+	2091	2091	44.54	29.24	26.68	52.54	54.14	50.55	33.486	52.41	-0.641188	0.0188865	0.00851613	-0.238315	1.30818e-05	8.54324e-06	-0.888752	3.37634e-50	9.8615e-51	-0.921952	1.10116e-49	3.04552e-50	K13711//phosphatidylinositol 4-kinase type 2 [EC:2.7.1.67]+ko01100//Metabolic pathways+ko04070//Phosphatidylinositol signaling system+ko00562//Inositol phosphate metabolism	XP_718470.1|0.0e+00|1-phosphatidylinositol 4-kinase [Candida albicans SC5314]	GO:0046488//phosphatidylinositol metabolic process;GO:0044238//primary metabolic process;GO:0006996//organelle organization;GO:0044237//cellular metabolic process;GO:0046854//phosphatidylinositol phosphorylation;GO:0045927//positive regulation of growth;GO:0050789//regulation of biological process;GO:0040007//growth;GO:0070783//growth of unicellular organism as a thread of attached cells;GO:19004…
3646682	3646682	XM_706599.2	Known_gene	1	1235775	1236602	NC_032096.1	-	828	828	185.83	213.31	205.78	126.81	115.81	116.86	201.64	119.826	0.728751	5.3651e-05	1.30269e-05	0.551315	1.89428e-26	6.95054e-27	0.881192	2.2551e-68	5.5597e-69	0.816322	4.63415e-57	1.19676e-57	K11290//template-activating factor I	XP_711691.2|6.8e-158|hypothetical protein CAALFM_CR05890CA [Candida albicans SC5314]	GO:0034728//nucleosome organization;GO:0006334//nucleosome assembly;GO:0006333//chromatin assembly or disassembly;GO:0043933//protein-containing complex subunit organization;GO:0009987//cellular process;GO:0006996//organelle organization;GO:0016043//cellular component organization;GO:0065004//protein-DNA complex assembly;GO:0006323//DNA packaging;GO:0031497//chromatin assembly;GO:0006325//chromat…
3643907	3643907	XM_709361.1	Known_gene	1	1759736	1761676	NC_032090.1	-	1941	1941	38.82	34.04	36.4	32.64	21.09	27.33	36.42	27.02	0.406986	0.118029	0.069153	0.250159	0.000212868	0.000149334	0.690672	9.53965e-20	4.29324e-20	0.413453	6.12384e-09	3.5384e-09	NA	XP_714454.1|0.0e+00|hypothetical protein CAALFM_C208660CA [Candida albicans SC5314]	GO:0016021//integral component of membrane;GO:0016020//membrane;GO:0110165//cellular anatomical entity;GO:0031224//intrinsic component of membrane;
3636885	DAO1	XM_716470.2	Known_gene	1	758553	759638	NC_032089.1	-	1086	1086	169.83	73.99	85.29	101.52	107.93	132.82	109.703	114.09	-0.0595846	0.893612	0.848731	0.742327	3.1351e-55	7.8952e-56	-0.544694	1.92854e-21	8.38006e-22	-0.639024	1.48234e-34	4.95432e-35	K00273//D-amino-acid oxidase [EC:1.4.3.3]+ko00311//Penicillin and cephalosporin biosynthesis+ko04146//Peroxisome+ko00330//Arginine and proline metabolism+ko01100//Metabolic pathways+ko01130//Biosynthesis of antibiotics+ko00260//Glycine, serine and threonine metabolism+ko00472//D-Arginine and D-ornithine metabolism	XP_721563.2|1.0e-206|Dao1p [Candida albicans SC5314]	GO:1901605//alpha-amino acid metabolic process;GO:0008152//metabolic process;GO:0044237//cellular metabolic process;GO:0006082//organic acid metabolic process;GO:0019752//carboxylic acid metabolic process;GO:0071704//organic substance metabolic process;GO:0043436//oxoacid metabolic process;GO:1901564//organonitrogen compound metabolic process;GO:0009987//cellular process;GO:0006520//cellular amin…
3637799	3637799	XM_715559.2	Known_gene	1	709951	711870	NC_032093.1	+	1920	1920	240.56	188.54	169.31	126.48	73.52	51.8	199.47	83.933	1.18138	0.00125432	0.00040886	0.927488	3.06543e-212	2.9868e-213	1.35866	0	0	1.70864	0	0	K08286//protein-serine/threonine kinase [EC:2.7.11.-]	XP_720652.2|0.0e+00|serine/threonine protein kinase [Candida albicans SC5314]	GO:0050789//regulation of biological process;GO:0009987//cellular process;GO:0065007//biological regulation;GO:0006793//phosphorus metabolic process;GO:0036211//protein modification process;GO:0006464//cellular protein modification process;GO:0019538//protein metabolic process;GO:0071704//organic substance metabolic process;GO:0006796//phosphate-containing compound metabolic process;GO:0044238//p…
3644011	GPX1	XM_709203.2	Known_gene	1	169118	169807	NC_032094.1	+	690	690	17.67	10.69	12.57	39.87	38.49	41.46	13.643	39.94	-1.53743	2.87556e-09	3.58668e-10	-1.174	1.51709e-17	6.68338e-18	-1.84822	7.10926e-32	2.5923e-32	-1.72174	2.75117e-31	9.66256e-32	K00432//glutathione peroxidase [EC:1.11.1.9]+ko00590//Arachidonic acid metabolism+ko00480//Glutathione metabolism	XP_714296.2|1.0e-127|Gpx1p [Candida albicans SC5314]	GO:0006979//response to oxidative stress;GO:0050896//response to stimulus;GO:0006950//response to stress;GO:0004601//peroxidase activity;GO:0003824//catalytic activity;GO:0016684//oxidoreductase activity, acting on peroxide as acceptor;GO:0016491//oxidoreductase activity;GO:0004602//glutathione peroxidase activity;GO:0016209//antioxidant activity;
30515176	30515176	XM_019475283.1	Known_gene	1	221731	221955	NC_032091.1	+	225	225	NA	NA	NA	NA	NA	NA	NA	NA	NA	NA	NA	NA	NA	NA	NA	NA	NA	NA	NA	NA	K18174//cytochrome c oxidase assembly factor 2	XP_019330828.1|9.9e-35|hypothetical protein CAALFM_C301090WA [Candida albicans SC5314]	GO:0071840//cellular component organization or biogenesis;GO:0017004//cytochrome complex assembly;GO:0034622//cellular protein-containing complex assembly;GO:0044085//cellular component biogenesis;GO:0007005//mitochondrion organization;GO:0033108//mitochondrial respiratory chain complex assembly;GO:0016043//cellular component organization;GO:0009987//cellular process;GO:0043933//protein-containin…
3646562	GIT1	XM_706749.1	Known_gene	1	1334165	1335724	NC_032090.1	-	1560	1560	0.53	2.12	1.95	4.27	2.77	2.85	1.533	3.296	-1.05328	0.0454014	0.0228328	-3.01017	1.07922e-16	4.84968e-17	-0.385822	0.196875	0.174938	-0.547488	0.065336	0.0549946	K08176//MFS transporter, PHS family, inorganic phosphate transporter	XP_711841.1|4.1e-305|Git1p [Candida albicans SC5314]	GO:0001407//glycerophosphodiester transmembrane transport;GO:0006810//transport;GO:0046323//glucose import;GO:0015748//organophosphate ester transport;GO:0015711//organic anion transport;GO:0006820//anion transport;GO:0009987//cellular process;GO:0071702//organic substance transport;GO:0009405//pathogenesis;GO:0006811//ion transport;GO:0008645//hexose transmembrane transport;GO:0034220//ion trans…
3641148	3641148	XM_712091.2	Known_gene	1	1069560	1071119	NC_032092.1	+	1560	1560	155.02	142.21	154.86	138.49	139.12	152.49	150.696	143.366	0.0598242	0.74471	0.664084	0.162673	1.63572e-05	1.0745e-05	0.0316931	0.421968	0.392898	0.0222499	0.628429	0.600054	K14855//ribosome assembly protein 4	XP_717184.2|2.7e-309|hypothetical protein CAALFM_C405010WA [Candida albicans SC5314]	GO:0009987//cellular process;GO:0071840//cellular component organization or biogenesis;GO:0043933//protein-containing complex subunit organization;GO:0042221//response to chemical;GO:0070887//cellular response to chemical stimulus;GO:0006996//organelle organization;GO:0042273//ribosomal large subunit biogenesis;GO:0022607//cellular component assembly;GO:0050896//response to stimulus;GO:0016043//c…
3634814	3634814	XM_718466.2	Known_gene	1	2208542	2209030	NC_032089.1	+	489	489	87.19	72.4	72.46	36.57	50.94	33.26	77.35	40.256	0.91093	0.000404829	0.00011957	1.2535	7.22177e-26	2.6811e-26	0.507191	1.12811e-05	7.64368e-06	1.1234	2.24855e-18	1.00814e-18	K13172//serine/arginine repetitive matrix protein 2	XP_723559.2|1.1e-86|U2-type spliceosomal complex subunit [Candida albicans SC5314]	GO:0010467//gene expression;GO:1901360//organic cyclic compound metabolic process;GO:0071704//organic substance metabolic process;GO:0043170//macromolecule metabolic process;GO:0006725//cellular aromatic compound metabolic process;GO:0090304//nucleic acid metabolic process;GO:0006807//nitrogen compound metabolic process;GO:0006139//nucleobase-containing compound metabolic process;GO:0046483//hete…
3646619	3646619	XM_706679.2	Known_gene	1	1424764	1426245	NC_032096.1	-	1482	1482	322.74	288.34	361.18	59.51	40.51	29.36	324.086	43.126	2.81081	2.10172e-22	7.23525e-24	2.43917	0	0	2.83142	0	0	3.62079	0	0	NA	XP_711771.2|2.7e-282|hypothetical protein CAALFM_CR06640CA [Candida albicans SC5314]	GO:0065003//protein-containing complex assembly;GO:0048308//organelle inheritance;GO:0071840//cellular component organization or biogenesis;GO:0006996//organelle organization;GO:0007010//cytoskeleton organization;GO:0010256//endomembrane system organization;GO:0000921//septin ring assembly;GO:0048309//endoplasmic reticulum inheritance;GO:0034622//cellular protein-containing complex assembly;GO:00…
3638535	BMT1	XM_714785.1	Known_gene	1	1643662	1645716	NC_032091.1	-	2055	2055	24.92	31.88	34.38	42.13	47.14	58.83	30.393	49.366	-0.699705	0.00127882	0.000417271	-0.757544	1.18851e-29	4.12534e-30	-0.5643	3.10791e-20	1.38158e-20	-0.774982	1.73313e-42	5.19188e-43	K13682//beta-1,2-mannosyltransferase [EC:2.4.1.-]	EEQ44739.1|0.0e+00|conserved hypothetical protein [Candida albicans WO-1]	GO:0044255//cellular lipid metabolic process;GO:0034645//cellular macromolecule biosynthetic process;GO:0006629//lipid metabolic process;GO:0035268//protein mannosylation;GO:0044260//cellular macromolecule metabolic process;GO:0044249//cellular biosynthetic process;GO:0006807//nitrogen compound metabolic process;GO:0071555//cell wall organization;GO:0044036//cell wall macromolecule metabolic proc…
3640719	ADE5,7	XM_712506.2	Known_gene	1	1718492	1720900	NC_032089.1	-	2409	2409	217.34	253.5	247.26	284.98	204.58	209.34	239.366	232.966	0.0201259	0.950212	0.925244	-0.390907	3.41325e-70	7.32792e-71	0.309321	9.17992e-41	2.99668e-41	0.240181	1.65923e-24	6.51308e-25	K11788//phosphoribosylamine--glycine ligase / phosphoribosylformylglycinamidine cyclo-ligase [EC:6.3.4.13 6.3.3.1]+ko00230//Purine metabolism+ko01100//Metabolic pathways+ko01130//Biosynthesis of antibiotics+ko01110//Biosynthesis of secondary metabolites	XP_717599.2|0.0e+00|bifunctional aminoimidazole ribotide synthase/glycinamide ribotide synthase [Candida albicans SC5314]	GO:1901564//organonitrogen compound metabolic process;GO:0050801//ion homeostasis;GO:0006793//phosphorus metabolic process;GO:0044238//primary metabolic process;GO:0055080//cation homeostasis;GO:1901135//carbohydrate derivative metabolic process;GO:0006796//phosphate-containing compound metabolic process;GO:0072521//purine-containing compound metabolic process;GO:0009112//nucleobase metabolic pro…
3638865	3638865	XM_714427.2	Known_gene	1	84801	86633	NC_032090.1	+	1833	1833	124.88	114.44	102.9	85.02	89.18	92.46	114.073	88.886	0.350566	0.0722699	0.0386169	0.554668	1.33956e-43	3.84866e-44	0.359799	4.8784e-19	2.22722e-19	0.154342	0.000287162	0.000205348	K03327//multidrug resistance protein, MATE family	XP_719520.1|0.0e+00|hypothetical protein CAALFM_C200540WA [Candida albicans SC5314]	GO:0110165//cellular anatomical entity;GO:0016020//membrane;GO:0031224//intrinsic component of membrane;GO:0016021//integral component of membrane;GO:0005215//transporter activity;GO:0015297//antiporter activity;GO:0022804//active transmembrane transporter activity;GO:0022857//transmembrane transporter activity;GO:0042910//xenobiotic transmembrane transporter activity;GO:0015291//secondary active…
3636923	TEM1	XM_019475077.1	Known_gene	1	641962	642642	NC_032089.1	-	681	603	4.95	4.65	7.09	14.34	15.51	14.68	5.563	14.843	-1.4043	3.76521e-06	7.47031e-07	-1.53454	1.13289e-08	6.46074e-09	-1.7379	7.99821e-11	4.50408e-11	-1.04999	1.62827e-05	1.09302e-05	K06682//Gtp-binding protein of the ras superfamily involved in termination of M-phase+ko04111//Cell cycle - yeast	XP_019330622.1|1.1e-107|Ras family GTPase [Candida albicans SC5314]	GO:0001100//negative regulation of exit from mitosis;GO:1900180//regulation of protein localization to nucleus;GO:0000278//mitotic cell cycle;GO:0007165//signal transduction;GO:0065007//biological regulation;GO:0051270//regulation of cellular component movement;GO:0051128//regulation of cellular component organization;GO:0044772//mitotic cell cycle phase transition;GO:0007015//actin filament orga…
3647786	3647786	XM_705528.2	Known_gene	1	993261	994097	NC_032090.1	-	837	837	4.37	4.41	4.92	7.29	7.79	9.08	4.566	8.053	-0.813723	0.00715259	0.00284771	-0.738286	0.00636089	0.00490204	-0.820845	0.00202528	0.00154523	-0.884034	0.000352315	0.000253406	NA	XP_710620.2|5.0e-156|hypothetical protein CAALFM_C204740CA [Candida albicans SC5314]	NA
3634782	MIR1	XM_718475.2	Known_gene	1	2236246	2237169	NC_032089.1	+	924	924	1353.62	1246.11	1497.07	1309.02	1567.71	1264.34	1365.6	1380.36	-0.0328877	0.885734	0.838891	0.0483357	0.00996017	0.00778532	-0.331227	1.88175e-97	3.82314e-98	0.243757	1.19087e-49	3.29562e-50	K15102//solute carrier family 25 (mitochondrial phosphate transporter), member 3	XP_723568.1|5.1e-170|Mir1p [Candida albicans SC5314]	GO:0051234//establishment of localization;GO:0015698//inorganic anion transport;GO:0009987//cellular process;GO:0006820//anion transport;GO:0035435//phosphate ion transmembrane transport;GO:0098661//inorganic anion transmembrane transport;GO:0051179//localization;GO:0006811//ion transport;GO:0055085//transmembrane transport;GO:0098660//inorganic ion transmembrane transport;GO:0098656//anion trans…
3638521	3638521	XM_714804.2	Known_gene	1	1599406	1600539	NC_032091.1	+	1134	1134	16.7	12.19	14.79	16.61	28.07	24.6	14.56	23.093	-0.660665	0.0169651	0.00753597	0.00779603	0.980226	0.97794	-1.20333	1.2055e-22	5.12562e-23	-0.734036	1.4738e-09	8.3512e-10	K20028//palmitoyltransferase ZDHHC2/15/20 [EC:2.3.1.225]	XP_719897.2|5.8e-224|palmitoyltransferase [Candida albicans SC5314]	GO:0044249//cellular biosynthetic process;GO:0043543//protein acylation;GO:0071705//nitrogen compound transport;GO:0015031//protein transport;GO:0043170//macromolecule metabolic process;GO:0018345//protein palmitoylation;GO:0044260//cellular macromolecule metabolic process;GO:0006464//cellular protein modification process;GO:0034613//cellular protein localization;GO:0051649//establishment of loca…
3647645	TOM70	XM_705657.1	Known_gene	1	563064	564953	NC_032095.1	+	1890	1890	87.58	79.92	120.07	93.63	102.51	101.31	95.856	99.15	-0.0686261	0.777539	0.703316	-0.0963694	0.0220117	0.0177333	-0.359136	1.06489e-17	5.0127e-18	0.245099	2.50488e-10	1.38515e-10	K17768//mitochondrial import receptor subunit TOM70	XP_710749.1|0.0e+00|protein channel [Candida albicans SC5314]	GO:0051179//localization;GO:0006605//protein targeting;GO:0006810//transport;GO:0051649//establishment of localization in cell;GO:0072594//establishment of protein localization to organelle;GO:0015031//protein transport;GO:0009987//cellular process;GO:0051234//establishment of localization;GO:0033036//macromolecule localization;GO:0015833//peptide transport;GO:0007005//mitochondrion organization;…
3636845	TSR2	XM_716403.1	Known_gene	1	638337	638966	NC_032089.1	-	630	630	253.76	320.98	289.5	153.4	156.04	152.31	288.08	153.916	0.881534	2.34173e-06	4.47902e-07	0.726166	2.79841e-41	8.26378e-42	1.04057	3.18937e-96	6.5543e-97	0.926553	1.47277e-70	3.38134e-71	K14800//pre-rRNA-processing protein TSR2	XP_721496.1|3.4e-117|Tsr2p [Candida albicans SC5314]	GO:0016072//rRNA metabolic process;GO:0006725//cellular aromatic compound metabolic process;GO:0034470//ncRNA processing;GO:0030490//maturation of SSU-rRNA;GO:0046483//heterocycle metabolic process;GO:0006139//nucleobase-containing compound metabolic process;GO:0071840//cellular component organization or biogenesis;GO:0009987//cellular process;GO:0044237//cellular metabolic process;GO:0042254//ri…
3644792	3644792	XM_708468.1	Known_gene	1	1021667	1022368	NC_032089.1	-	702	702	16.22	19.3	14.33	28.76	21.51	16.1	16.616	22.123	-0.421012	0.243194	0.163407	-0.82629	4.9137e-08	2.87178e-08	-0.156407	0.33719	0.309292	-0.168022	0.355191	0.324418	NA	XP_713561.1|1.1e-127|hypothetical protein CAALFM_C104930CA [Candida albicans SC5314]	GO:0016020//membrane;GO:0031224//intrinsic component of membrane;GO:0016021//integral component of membrane;GO:0110165//cellular anatomical entity;
3645345	3645345	XM_707933.2	Known_gene	1	2548322	2549842	NC_032089.1	-	1521	1521	15.91	10.92	11.34	94.97	78.52	96.39	12.723	89.96	-2.79069	4.72777e-34	9.12058e-36	-2.57754	2.97985e-284	2.26318e-285	-2.84609	7.86221e-265	7.84254e-266	-3.08746	0	0	K00641//homoserine O-acetyltransferase/O-succinyltransferase [EC:2.3.1.31 2.3.1.46]+ko00920//Sulfur metabolism+ko01100//Metabolic pathways+ko01130//Biosynthesis of antibiotics+ko01110//Biosynthesis of secondary metabolites+ko00270//Cysteine and methionine metabolism	XP_713026.2|9.9e-296|hypothetical protein CAALFM_C111610CA [Candida albicans SC5314]	GO:0044237//cellular metabolic process;GO:0009086//methionine biosynthetic process;GO:0006555//methionine metabolic process;GO:0000097//sulfur amino acid biosynthetic process;GO:0006807//nitrogen compound metabolic process;GO:0043436//oxoacid metabolic process;GO:0006520//cellular amino acid metabolic process;GO:0009067//aspartate family amino acid biosynthetic process;GO:1901605//alpha-amino aci…
3642483	YPT53	XM_710772.1	Known_gene	1	1123169	1123828	NC_032089.1	+	660	660	51.12	46.85	35.22	17.41	28.14	27.9	44.396	24.483	0.84115	0.00437606	0.00162729	1.55397	4.10554e-31	1.39153e-31	0.735427	1.59701e-09	9.40092e-10	0.33613	0.0145739	0.0116479	K07976//Rab family, other;K07889//Ras-related protein Rab-5C+ko04144//Endocytosis+ko04145//Phagosome	XP_715865.1|2.4e-121|Rab family GTPase [Candida albicans SC5314]	GO:0009987//cellular process;GO:0051234//establishment of localization;GO:0007154//cell communication;GO:0023052//signaling;GO:0042886//amide transport;GO:0007165//signal transduction;GO:0050794//regulation of cellular process;GO:0006886//intracellular protein transport;GO:0015031//protein transport;GO:0051179//localization;GO:0006810//transport;GO:0051641//cellular localization;GO:0008104//prote…
3646624	3646624	XM_019475548.1,BGI_novel_T000249	Known_gene	2	1439829	1440738	NC_032096.1	-	910	839	68.68	63.12	72.59	112.01	111.46	119.89	68.13	114.453	-0.7732	1.08835e-06	1.98013e-07	-0.705666	4.8351e-26	1.78699e-26	-0.820357	1.75008e-35	6.09244e-36	-0.723869	2.10998e-29	7.6391e-30	K15435//2',3'-cyclic-nucleotide 3'-phosphodiesterase [EC:3.1.4.37];K15435//2',3'-cyclic-nucleotide 3'-phosphodiesterase [EC:3.1.4.37]	XP_019331093.1|1.6e-137|2',3'-cyclic-nucleotide 3'-phosphodiesterase [Candida albicans SC5314]	GO:1901360//organic cyclic compound metabolic process;GO:0019637//organophosphate metabolic process;GO:0006807//nitrogen compound metabolic process;GO:0009187//cyclic nucleotide metabolic process;GO:0034641//cellular nitrogen compound metabolic process;GO:0044281//small molecule metabolic process;GO:0055086//nucleobase-containing small molecule metabolic process;GO:0006725//cellular aromatic comp…
3635147	MAK21	XM_718032.1	Known_gene	1	962464	965664	NC_032091.1	+	3201	3201	218.93	279.92	265.85	273.51	234.47	250.86	254.9	252.946	-0.00183875	0.995655	0.992012	-0.321124	6.76959e-63	1.56499e-63	0.255611	3.72295e-42	1.19234e-42	0.08373	1.64376e-05	1.10397e-05	K19898//alpha-agglutinin	THV90109.1|1.9e-22|hypothetical protein D6D26_09532, partial [Aureobasidium pullulans]	GO:0043226//organelle;GO:0043228//non-membrane-bounded organelle;GO:0005634//nucleus;GO:0005730//nucleolus;GO:0043232//intracellular non-membrane-bounded organelle;GO:0070013//intracellular organelle lumen;GO:0005622//intracellular;GO:0043231//intracellular membrane-bounded organelle;GO:0031981//nuclear lumen;GO:0043233//organelle lumen;GO:0031974//membrane-enclosed lumen;GO:0043227//membrane-bou…
3635616	3635616	XM_717612.2	Known_gene	1	314498	315304	NC_032092.1	+	807	807	81.48	75.69	99.09	67.14	86.29	71.93	85.42	75.12	0.165268	0.456116	0.357505	0.279273	0.000338026	0.000239726	-0.189091	0.00965407	0.00767978	0.462146	1.19779e-10	6.53974e-11	K16066//3-hydroxy acid dehydrogenase / malonic semialdehyde reductase [EC:1.1.1.381 1.1.1.-]+ko01100//Metabolic pathways+ko00260//Glycine, serine and threonine metabolism+ko00240//Pyrimidine metabolism	XP_722705.1|5.9e-146|oxidoreductase [Candida albicans SC5314]	GO:0003824//catalytic activity;GO:0016616//oxidoreductase activity, acting on the CH-OH group of donors, NAD or NADP as acceptor;GO:0016491//oxidoreductase activity;GO:0016614//oxidoreductase activity, acting on CH-OH group of donors;
3638803	3638803	XM_714459.2	Known_gene	1	34967	35674	NC_032090.1	-	708	708	63.83	66.72	69.27	65.63	59.37	67.1	66.606	64.033	0.039809	0.863725	0.810002	-0.0401208	0.612845	0.58304	0.168385	0.0639885	0.0541474	0.0459179	0.687891	0.659926	NA	XP_719552.2|5.3e-135|hypothetical protein CAALFM_C200270CA [Candida albicans SC5314]	GO:0016021//integral component of membrane;GO:0016020//membrane;GO:0110165//cellular anatomical entity;GO:0031224//intrinsic component of membrane;
3646058	3646058	XM_707251.2	Known_gene	1	1592134	1594029	NC_032096.1	+	1896	1896	38.46	44.4	51.81	33.51	38.03	40.87	44.89	37.47	0.24588	0.226227	0.149701	0.198767	0.00379637	0.00287826	0.223422	0.000385314	0.000282542	0.342188	1.03813e-08	6.03992e-09	NA	XP_712344.2|0.0e+00|hypothetical protein CAALFM_CR07310WA [Candida albicans SC5314]	NA
30515158	30515158	XM_019475267.1	Known_gene	1	1898815	1899127	NC_032090.1	+	313	240	40.2	42.35	48.25	36.38	50.45	51.46	43.6	46.096	-0.0997658	0.783117	0.709403	0.14405	0.640242	0.611664	-0.252492	0.291916	0.26567	-0.0929225	0.624185	0.59517	NA	XP_019330812.1|2.1e-35|hypothetical protein CAALFM_C209290WA [Candida albicans SC5314]	GO:0022607//cellular component assembly;GO:0070070//proton-transporting V-type ATPase complex assembly;GO:0043933//protein-containing complex subunit organization;GO:0044085//cellular component biogenesis;GO:0065003//protein-containing complex assembly;GO:0016043//cellular component organization;GO:0070072//vacuolar proton-transporting V-type ATPase complex assembly;GO:0071840//cellular component…
3639367	3639367	XM_713923.2	Known_gene	1	85080	87248	NC_032089.1	-	2169	2169	78.44	73.25	81.04	117.23	106.58	100.41	77.576	108.073	-0.491065	0.00672446	0.00265378	-0.57968	2.1964e-53	5.64098e-54	-0.541036	3.25869e-43	1.02897e-43	-0.309197	1.91054e-15	9.1357e-16	NA	XP_719016.2|0.0e+00|hypothetical protein CAALFM_C100540CA [Candida albicans SC5314]	GO:0044238//primary metabolic process;GO:0044260//cellular macromolecule metabolic process;GO:0070647//protein modification by small protein conjugation or removal;GO:0044237//cellular metabolic process;GO:0008152//metabolic process;GO:0006807//nitrogen compound metabolic process;GO:0044267//cellular protein metabolic process;GO:0036211//protein modification process;GO:0000209//protein polyubiqui…
3635606	3635606	XM_717661.2	Known_gene	1	202398	206000	NC_032092.1	-	3603	3603	30.42	23.59	24.1	32.16	36.95	34.58	26.036	34.563	-0.412009	0.0491969	0.0249462	-0.0802473	0.122283	0.105277	-0.647399	1.71628e-35	5.96904e-36	-0.520905	6.55194e-23	2.65156e-23	K11771//SWI/SNF chromatin-remodeling complex subunit SWI1	XP_722754.1|0.0e+00|hypothetical protein CAALFM_C401020CA [Candida albicans SC5314]	GO:0007004//telomere maintenance via telomerase;GO:0034645//cellular macromolecule biosynthetic process;GO:1901576//organic substance biosynthetic process;GO:0071897//DNA biosynthetic process;GO:0071704//organic substance metabolic process;GO:0051052//regulation of DNA metabolic process;GO:0044238//primary metabolic process;GO:0009889//regulation of biosynthetic process;GO:0046483//heterocycle me…
3639532	3639532	XM_713697.1	Known_gene	1	1504795	1506954	NC_032089.1	-	2160	2160	NA	NA	NA	NA	NA	NA	NA	NA	NA	NA	NA	NA	NA	NA	NA	NA	NA	NA	NA	NA	K19783//DNA polymerase alpha-associated DNA helicase A [EC:3.6.4.12]	XP_718790.1|0.0e+00|ATP-dependent 5'-3' DNA helicase [Candida albicans SC5314]	GO:0000166//nucleotide binding;GO:0005524//ATP binding;GO:0017076//purine nucleotide binding;GO:1901363//heterocyclic compound binding;GO:0035639//purine ribonucleoside triphosphate binding;GO:0036094//small molecule binding;GO:0003824//catalytic activity;GO:0016817//hydrolase activity, acting on acid anhydrides;GO:0003676//nucleic acid binding;GO:0016818//hydrolase activity, acting on acid anhyd…
3635853	SPR3	XM_717475.2	Known_gene	1	405503	406978	NC_032090.1	+	1476	1476	0.15	0.29	0.25	0.1	0.05	0.05	0.23	0.066	1.28951	0.192988	0.123181	0.584963	0.661843	0.634064	2.53605	0.0823576	0.0704058	2.32193	0.12813	0.110646	K12773//sporulation-regulated protein 3+ko04113//Meiosis - yeast	XP_722568.2|3.5e-282|septin [Candida albicans SC5314]	GO:0051641//cellular localization;GO:0033036//macromolecule localization;GO:0008104//protein localization;GO:0051179//localization;GO:0022402//cell cycle process;GO:0007049//cell cycle;GO:0009987//cellular process;GO:0034613//cellular protein localization;GO:0000910//cytokinesis;GO:0051301//cell division;GO:0070727//cellular macromolecule localization;GO:0061640//cytoskeleton-dependent cytokinesi…
3638495	3638495	XM_714736.1	Known_gene	1	1734635	1735285	NC_032091.1	+	651	651	215.18	212.53	239.93	176.67	166.67	155.37	222.546	166.236	0.396396	0.0277816	0.0131539	0.284487	2.03292e-07	1.21792e-07	0.350672	8.02375e-11	4.5198e-11	0.626906	1.91795e-31	6.7106e-32	K11682//SWR1-complex protein 3	XP_719829.1|3.2e-118|hypothetical protein CAALFM_C307600WA [Candida albicans SC5314]	NA
3642905	3642905	XM_710316.2	Known_gene	1	1562962	1566078	NC_032092.1	-	3117	3117	3.24	8	10.34	28.23	21.1	21.08	7.193	23.47	-1.66918	1.26088e-05	2.72601e-06	-3.12316	2.79872e-222	2.60108e-223	-1.39917	1.20647e-61	3.16358e-62	-1.02764	4.87063e-38	1.54429e-38	K20361//intracellular protein transport protein USO1	XP_715409.2|0.0e+00|hypothetical protein CAALFM_C407080CA [Candida albicans SC5314]	GO:0043232//intracellular non-membrane-bounded organelle;GO:0043226//organelle;GO:0043228//non-membrane-bounded organelle;GO:0043229//intracellular organelle;GO:0110165//cellular anatomical entity;GO:0015630//microtubule cytoskeleton;GO:0005622//intracellular;GO:0005856//cytoskeleton;GO:0005815//microtubule organizing center;
3635743	STT3	XM_717434.1	Known_gene	1	299220	301475	NC_032090.1	-	2256	2256	20.73	24.21	41	32.79	35.63	40.93	28.646	36.45	-0.36391	0.224486	0.147841	-0.661536	1.49161e-20	6.14132e-21	-0.557489	8.58207e-17	4.13142e-17	0.00246524	0.997374	0.997374	K07151//dolichyl-diphosphooligosaccharide---protein glycosyltransferase [EC:2.4.99.18]+ko04141//Protein processing in endoplasmic reticulum+ko01100//Metabolic pathways+ko00513//Various types of N-glycan biosynthesis+ko00510//N-Glycan biosynthesis	XP_722527.1|0.0e+00|dolichyl-diphosphooligosaccharide--protein glycosyltransferase subunit [Candida albicans SC5314]	GO:0009058//biosynthetic process;GO:1901564//organonitrogen compound metabolic process;GO:0008152//metabolic process;GO:0044237//cellular metabolic process;GO:0018193//peptidyl-amino acid modification;GO:0019538//protein metabolic process;GO:0009059//macromolecule biosynthetic process;GO:0044260//cellular macromolecule metabolic process;GO:0070085//glycosylation;GO:0006807//nitrogen compound meta…
3647075	3647075	XM_706240.2	Known_gene	1	119448	120974	NC_032094.1	+	1527	1527	22.07	22.04	30.4	21.25	17.64	21.36	24.836	20.083	0.281679	0.241432	0.161883	0.0546238	0.616401	0.586628	0.321274	0.00177308	0.00134777	0.50916	1.60047e-08	9.38894e-09	NA	XP_711332.2|1.6e-293|hypothetical protein CAALFM_C600690WA [Candida albicans SC5314]	NA
3641585	3641585	XM_711674.2	Known_gene	1	139506	141368	NC_032093.1	-	1863	1863	9.93	3.73	5.69	13.4	18.69	18.36	6.45	16.816	-1.34286	0.00020763	5.73545e-05	-0.432367	0.000310908	0.00022008	-2.32502	1.5931e-63	4.10034e-64	-1.69007	3.69779e-41	1.12437e-41	NA	XP_716767.2|0.0e+00|hypothetical protein CAALFM_C500610CA [Candida albicans SC5314]	NA
3637779	PUT1	XM_715489.2	Known_gene	1	580917	582386	NC_032093.1	+	1470	1470	153.14	138.71	122.65	195.45	271.64	275.99	138.166	247.693	-0.832818	0.000128253	3.3679e-05	-0.351948	2.24187e-24	8.5209e-25	-0.969624	1.20494e-194	1.51547e-195	-1.17007	1.68181e-267	1.56076e-268	K00318//proline dehydrogenase [EC:1.5.-.-]+ko00330//Arginine and proline metabolism+ko01100//Metabolic pathways+ko01130//Biosynthesis of antibiotics+ko01110//Biosynthesis of secondary metabolites	XP_720582.1|2.4e-283|proline dehydrogenase [Candida albicans SC5314]	GO:1901360//organic cyclic compound metabolic process;GO:0043436//oxoacid metabolic process;GO:0046700//heterocycle catabolic process;GO:0009064//glutamine family amino acid metabolic process;GO:0010133//proline catabolic process to glutamate;GO:0009065//glutamine family amino acid catabolic process;GO:0006560//proline metabolic process;GO:0046483//heterocycle metabolic process;GO:1901361//organi…
3639295	HBR1	XM_713943.1	Known_gene	1	49997	50743	NC_032089.1	+	747	747	113.74	164.65	172.78	146.14	130.64	136.21	150.39	137.663	0.10567	0.702129	0.617005	-0.361611	8.1638e-10	4.48166e-10	0.333806	2.77683e-09	1.65035e-09	0.343104	1.10755e-09	6.23898e-10	K18532//adenylate kinase [EC:2.7.4.3]+ko00230//Purine metabolism+ko01100//Metabolic pathways+ko01130//Biosynthesis of antibiotics+ko03008//Ribosome biogenesis in eukaryotes+ko01110//Biosynthesis of secondary metabolites	RCK55926.1|4.3e-119|Adenylate kinase isoenzyme 6 HBR1 [Candida viswanathii]	GO:0034470//ncRNA processing;GO:0090304//nucleic acid metabolic process;GO:0016072//rRNA metabolic process;GO:0010467//gene expression;GO:0062197//cellular response to chemical stress;GO:0042221//response to chemical;GO:0034599//cellular response to oxidative stress;GO:0042274//ribosomal small subunit biogenesis;GO:0006979//response to oxidative stress;GO:0030490//maturation of SSU-rRNA;GO:000046…
3637790	CST20	XM_715458.1	Known_gene	1	517861	521547	NC_032093.1	-	3687	3687	31.27	19.98	25.99	72.46	66.74	57.24	25.746	65.48	-1.3448	1.38209e-08	1.90666e-09	-1.21241	5.40309e-197	5.54348e-198	-1.74	0	0	-1.13907	2.58344e-141	3.94274e-142	K04409//p21-activated kinase 1 [EC:2.7.11.1]+ko04011//MAPK signaling pathway - yeast+ko04392//Hippo signaling pathway - multiple species	XP_720551.1|0.0e+00|mitogen-activated protein kinase kinase kinase kinase [Candida albicans SC5314]	GO:0044237//cellular metabolic process;GO:0044182//filamentous growth of a population of unicellular organisms;GO:0030435//sporulation resulting in formation of a cellular spore;GO:0045927//positive regulation of growth;GO:0043936//asexual sporulation resulting in formation of a cellular spore;GO:0009653//anatomical structure morphogenesis;GO:0043934//sporulation;GO:0006796//phosphate-containing …
3646403	3646403	XM_706896.2	Known_gene	1	1105182	1109018	NC_032096.1	+	3837	3837	5.02	6.66	9.91	8.91	8.01	8.74	7.196	8.553	-0.268987	0.384449	0.287969	-0.827738	8.93078e-15	4.22442e-15	-0.26628	0.0100908	0.00803726	0.181252	0.0532482	0.0444652	K11294//nucleolin	XP_711989.2|0.0e+00|hypothetical protein CAALFM_CR05100WA [Candida albicans SC5314]	GO:0042981//regulation of apoptotic process;GO:0043086//negative regulation of catalytic activity;GO:0031324//negative regulation of cellular metabolic process;GO:0051346//negative regulation of hydrolase activity;GO:0006996//organelle organization;GO:0007051//spindle organization;GO:1902850//microtubule cytoskeleton organization involved in mitosis;GO:0022607//cellular component assembly;GO:0043…
3643280	RIM101	XM_709954.1	Known_gene	1	3158465	3160450	NC_032089.1	-	1986	1986	1526.42	894.82	586.69	599.08	607.04	669.81	1002.64	625.31	0.663197	0.0733843	0.0393222	1.34933	0	0	0.559806	0	0	-0.191154	7.87108e-36	2.57692e-36	K11215//transcription factor STE12+ko04011//MAPK signaling pathway - yeast;K21545//C2H2 transcription facotor;K12498//early growth response protein 4	XP_715047.1|0.0e+00|alkaline-responsive transcriptional regulator [Candida albicans SC5314]	GO:0048584//positive regulation of response to stimulus;GO:0001410//chlamydospore formation;GO:0050896//response to stimulus;GO:0031326//regulation of cellular biosynthetic process;GO:0031669//cellular response to nutrient levels;GO:0044416//induction by symbiont of host defense response;GO:0048878//chemical homeostasis;GO:0036176//response to neutral pH;GO:0048518//positive regulation of biologi…
3642248	3642248	XM_711018.1	Known_gene	1	1508187	1509278	NC_032091.1	+	1092	1092	61.83	36.11	50.77	50.61	53.87	43.19	49.57	49.223	-0.00951123	0.980105	0.968362	0.288885	0.000104482	7.18186e-05	-0.577084	1.48986e-12	7.97244e-13	0.233279	0.00473573	0.00365634	NA	XP_716111.1|4.1e-203|hypothetical protein CAALFM_C306610WA [Candida albicans SC5314]	NA
3647134	3647134	XM_706154.2	Known_gene	1	113323	114414	NC_032094.1	-	1092	1092	8.96	11.76	15.86	12.45	16.72	20.08	12.193	16.416	-0.432917	0.171281	0.106733	-0.474575	0.00503026	0.00384726	-0.507687	0.000527344	0.000389768	-0.340366	0.00836319	0.00657406	K03143//transcription initiation factor TFIIH subunit 3+ko03420//Nucleotide excision repair+ko03022//Basal transcription factors	XP_711246.2|9.2e-203|TFIIH/NER complex subunit [Candida albicans SC5314]	GO:0006796//phosphate-containing compound metabolic process;GO:0036211//protein modification process;GO:0006357//regulation of transcription by RNA polymerase II;GO:0043170//macromolecule metabolic process;GO:0019219//regulation of nucleobase-containing compound metabolic process;GO:0016310//phosphorylation;GO:0044237//cellular metabolic process;GO:0006950//response to stress;GO:2001141//regulati…
3642105	3642105	XM_711176.1	Known_gene	1	1850799	1851599	NC_032096.1	-	801	801	38.96	37.89	38.65	20.66	23.75	30.15	38.5	24.853	0.61575	0.0054363	0.00207851	0.915153	9.64576e-14	4.6558e-14	0.67389	1.51999e-08	9.24418e-09	0.35831	0.00190578	0.00143426	NA	XP_716269.1|2.4e-144|hypothetical protein CAALFM_CR08580CA [Candida albicans SC5314]	NA
3645574	3645574	XM_707719.2	Known_gene	1	1168416	1169708	NC_032090.1	-	1293	1293	475.98	411.83	398.12	204.01	196.6	203.73	428.643	201.446	1.06982	1.18368e-09	1.40947e-10	1.22226	0	0	1.06679	1.56125e-298	1.41672e-299	0.966545	1.15032e-242	1.17102e-243	K20465//oxysterol-binding protein-related protein 9/10/11	XP_712812.2|2.2e-248|oxysterol-binding protein [Candida albicans SC5314]	GO:0043231//intracellular membrane-bounded organelle;GO:0016020//membrane;GO:0043227//membrane-bounded organelle;GO:0043229//intracellular organelle;GO:0110165//cellular anatomical entity;GO:0005622//intracellular;GO:0043226//organelle;GO:0005829//cytosol;GO:0005737//cytoplasm;GO:0005496//steroid binding;GO:0005488//binding;GO:0032934//sterol binding;GO:0005215//transporter activity;GO:0005319//l…
3643882	3643882	XM_709352.2	Known_gene	1	1776991	1778634	NC_032090.1	+	1644	1644	34.96	35.17	36.74	35.52	34.49	36.17	35.623	35.393	-0.00326283	0.988622	0.982703	-0.0229264	0.744872	0.72068	0.0281672	0.716148	0.695362	0.022558	0.804248	0.78522	K07478//putative ATPase	XP_714445.2|0.0e+00|hypothetical protein CAALFM_C208740WA [Candida albicans SC5314]	GO:1901576//organic substance biosynthetic process;GO:0008152//metabolic process;GO:0006282//regulation of DNA repair;GO:0044260//cellular macromolecule metabolic process;GO:0071704//organic substance metabolic process;GO:0060255//regulation of macromolecule metabolic process;GO:0050789//regulation of biological process;GO:0019219//regulation of nucleobase-containing compound metabolic process;GO…
3640759	3640759	XM_712547.2	Known_gene	1	1806847	1807839	NC_032089.1	-	993	993	11.19	13.2	10.27	5.45	7.14	7.36	11.553	6.65	0.778406	0.00612843	0.00238696	1.03788	5.60872e-07	3.44426e-07	0.886542	1.65122e-06	1.08493e-06	0.480659	0.0171001	0.0137468	NA	XP_717640.1|2.7e-193|hypothetical protein CAALFM_C108240CA [Candida albicans SC5314]	GO:0005622//intracellular;GO:0005737//cytoplasm;GO:0110165//cellular anatomical entity;GO:0003824//catalytic activity;GO:0016866//intramolecular transferase activity;GO:0016868//intramolecular transferase activity, phosphotransferases;GO:0016853//isomerase activity;
3647351	PTC6	XM_705952.2	Known_gene	1	1682501	1683802	NC_032096.1	-	1302	1302	248.93	213.4	185.36	199.15	174.38	211.79	215.896	195.106	0.137289	0.589462	0.49143	0.321885	3.15586e-22	1.25677e-22	0.291326	1.46752e-16	7.0965e-17	-0.192305	2.02686e-08	1.19545e-08	K19708//protein phosphatase PTC6 [EC:3.1.3.16 3.1.3.43]+ko04139//Mitophagy - yeast	XP_711044.1|4.9e-251|type 2C protein phosphatase [Candida albicans SC5314]	GO:0071704//organic substance metabolic process;GO:0065007//biological regulation;GO:0048518//positive regulation of biological process;GO:0006793//phosphorus metabolic process;GO:0009893//positive regulation of metabolic process;GO:0051341//regulation of oxidoreductase activity;GO:0016311//dephosphorylation;GO:0019538//protein metabolic process;GO:0006796//phosphate-containing compound metabolic…
3636179	3636179	XM_717034.2	Known_gene	1	2800779	2801945	NC_032089.1	-	1167	1167	41.57	38.27	30.56	27.69	28	24.26	36.8	26.65	0.450979	0.074431	0.0400935	0.586178	9.58218e-11	5.09592e-11	0.450787	7.59718e-07	4.93468e-07	0.333065	0.0012728	0.00094771	K11238//cytokinesis protein+ko04011//MAPK signaling pathway - yeast;K11422//histone-lysine N-methyltransferase SETD1 [EC:2.1.1.43]+ko00310//Lysine degradation	XP_722127.2|4.5e-232|hypothetical protein CAALFM_C112860CA [Candida albicans SC5314]	NA
3647067	SUN41	XM_706223.2	Known_gene	1	158273	159529	NC_032094.1	+	1257	1257	92.29	202.8	219.3	1360.82	1182.7	1400.81	171.463	1314.78	-2.87868	1.33886e-20	5.32161e-22	-3.88216	0	0	-2.54395	0	0	-2.67528	0	0	K01238//SUN family beta-glucosidase [EC:3.2.1.-]	XP_711315.2|2.0e-246|putative glucosidase [Candida albicans SC5314]	GO:0050896//response to stimulus;GO:0042710//biofilm formation;GO:0051703//intraspecies interaction between organisms;GO:0016043//cellular component organization;GO:0009987//cellular process;GO:0071554//cell wall organization or biogenesis;GO:0009056//catabolic process;GO:0008152//metabolic process;GO:1901575//organic substance catabolic process;GO:0044419//interspecies interaction between organi…
3640167	3640167	XM_713094.1	Known_gene	1	325668	326258	NC_032096.1	+	591	591	8.52	12.88	18.41	20.18	24.89	21.11	13.27	22.06	-0.738801	0.0277384	0.0131196	-1.244	1.06041e-08	6.04382e-09	-0.950434	3.57522e-07	2.29124e-07	-0.197437	0.262488	0.234542	K11562//kinetochore protein NNF1	XP_718187.1|2.5e-101|MIND complex subunit [Candida albicans SC5314]	GO:0009987//cellular process;GO:0007059//chromosome segregation;GO:0005622//intracellular;GO:0000777//condensed chromosome kinetochore;GO:0043226//organelle;GO:0031974//membrane-enclosed lumen;GO:0000793//condensed chromosome;GO:0031981//nuclear lumen;GO:0005694//chromosome;GO:0000778//condensed nuclear chromosome kinetochore;GO:0000776//kinetochore;GO:0043232//intracellular non-membrane-bounded …
3638017	3638017	XM_715210.1	Known_gene	1	221546	222589	NC_032095.1	+	1044	1044	2.55	1.96	2.31	3.95	4.49	4.68	2.273	4.373	-0.928871	0.0085047	0.00344827	-0.631355	0.0499169	0.0413286	-1.19586	0.000256768	0.000186269	-1.01862	0.00110056	0.000816526	K17741//NADPH-dependent methylglyoxal reductase [EC:1.1.1.283]+ko04011//MAPK signaling pathway - yeast+ko00640//Propanoate metabolism+ko00620//Pyruvate metabolism	XP_720303.1|2.7e-191|hypothetical protein CAALFM_C701050WA [Candida albicans SC5314]	GO:0016614//oxidoreductase activity, acting on CH-OH group of donors;GO:0003824//catalytic activity;GO:0016616//oxidoreductase activity, acting on the CH-OH group of donors, NAD or NADP as acceptor;GO:0016491//oxidoreductase activity;
3639354	3639354	XM_713885.2	Known_gene	1	176325	178475	NC_032089.1	+	2151	2151	16.65	16.14	18.63	15.43	18.79	19.68	17.14	17.966	-0.0775782	0.724023	0.641422	0.109784	0.272026	0.245476	-0.219324	0.0161908	0.0130687	-0.0791025	0.361803	0.331	K07870//mitochondrial Rho GTPase 1 [EC:3.6.5.-]	XP_718978.1|0.0e+00|ERMES complex Ca(2+)-binding regulatory GTPase [Candida albicans SC5314]	GO:1903338//regulation of cell wall organization or biogenesis;GO:1900428//regulation of filamentous growth of a population of unicellular organisms;GO:0071840//cellular component organization or biogenesis;GO:0051128//regulation of cellular component organization;GO:0007005//mitochondrion organization;GO:0007165//signal transduction;GO:0051716//cellular response to stimulus;GO:0060237//regulatio…
3640179	NMA111	XM_713018.2	Known_gene	1	199316	202249	NC_032089.1	-	2934	2934	150.69	188.71	169.67	156.13	137.24	135.87	169.69	143.08	0.231463	0.302787	0.213708	-0.0511641	0.0459068	0.0379014	0.45947	6.90366e-77	1.60068e-77	0.320505	1.88528e-35	6.1848e-36	K22686//pro-apoptotic serine protease NMA111 [EC:3.4.21.-]	XP_718111.2|0.0e+00|Nma111p [Candida albicans SC5314]	GO:0016787//hydrolase activity;GO:0070011//peptidase activity, acting on L-amino acid peptides;GO:0017171//serine hydrolase activity;GO:0003824//catalytic activity;GO:0016825//hydrolase activity, acting on acid phosphorus-nitrogen bonds;GO:0140096//catalytic activity, acting on a protein;GO:0004175//endopeptidase activity;GO:0008236//serine-type peptidase activity;GO:0004252//serine-type endopept…
3648118	3648118	XM_705187.2	Known_gene	1	1337607	1340003	NC_032089.1	+	2397	2397	7.49	5.35	6.23	22.89	19.07	15.15	6.356	19.036	-1.57274	3.02246e-09	3.78499e-10	-1.61168	6.51063e-62	1.52573e-62	-1.83369	1.68176e-62	4.37902e-63	-1.28201	7.94682e-30	2.85328e-30	K01183//chitinase [EC:3.2.1.14]+ko00520//Amino sugar and nucleotide sugar metabolism+ko01100//Metabolic pathways	XP_710279.2|0.0e+00|hypothetical protein CAALFM_C106320WA [Candida albicans SC5314]	GO:0071705//nitrogen compound transport;GO:0033036//macromolecule localization;GO:0006996//organelle organization;GO:0007031//peroxisome organization;GO:0072662//protein localization to peroxisome;GO:0015031//protein transport;GO:0071840//cellular component organization or biogenesis;GO:0051649//establishment of localization in cell;GO:0071806//protein transmembrane transport;GO:0006810//transpor…
30515341	30515341	XM_019475466.1	Known_gene	1	658611	658802	NC_032094.1	+	192	192	2268.27	2345.8	3139.21	2999.75	3568.3	3296.09	2584.43	3288.05	-0.370793	0.0594019	0.0308914	-0.40325	3.6622e-27	1.32483e-27	-0.605157	7.57536e-64	1.94217e-64	-0.0703541	0.0099615	0.00786032	K02135//F-type H+-transporting ATPase subunit epsilon+ko01100//Metabolic pathways+ko00190//Oxidative phosphorylation	XP_019331011.1|1.9e-26|hypothetical protein CAALFM_C603130WA [Candida albicans SC5314]	GO:0009165//nucleotide biosynthetic process;GO:1901360//organic cyclic compound metabolic process;GO:0034641//cellular nitrogen compound metabolic process;GO:0009117//nucleotide metabolic process;GO:0006793//phosphorus metabolic process;GO:0019438//aromatic compound biosynthetic process;GO:1901137//carbohydrate derivative biosynthetic process;GO:0051179//localization;GO:0072521//purine-containing…
3638389	3638389	XM_714899.1	Known_gene	1	638299	638709	NC_032091.1	+	411	411	NA	NA	NA	NA	NA	NA	NA	NA	NA	NA	NA	NA	NA	NA	NA	NA	NA	NA	NA	NA	NA	XP_719978.1|7.8e-70|hypothetical protein CAALFM_C302890CA [Candida albicans SC5314]	GO:0031224//intrinsic component of membrane;GO:0016021//integral component of membrane;GO:0016020//membrane;GO:0110165//cellular anatomical entity;
3638836	3638836	XM_714375.2	Known_gene	1	172317	172958	NC_032090.1	+	642	642	124.28	138.92	273.57	105.4	156.11	113.77	178.923	125.093	0.470618	0.179944	0.113239	0.237719	0.00116127	0.000851612	-0.168309	0.00686431	0.00540328	1.26579	2.78989e-113	4.89928e-114	K10756//replication factor C subunit 3/5+ko03430//Mismatch repair+ko03420//Nucleotide excision repair+ko03030//DNA replication	XP_719468.2|3.7e-119|mitochondrial 54S ribosomal protein YmL47 [Candida albicans SC5314]	GO:0034641//cellular nitrogen compound metabolic process;GO:0043170//macromolecule metabolic process;GO:0006412//translation;GO:0044237//cellular metabolic process;GO:1901576//organic substance biosynthetic process;GO:1901564//organonitrogen compound metabolic process;GO:0008152//metabolic process;GO:1901566//organonitrogen compound biosynthetic process;GO:0009058//biosynthetic process;GO:0010467…
3635768	CHT4	XM_717467.1	Known_gene	1	388066	389232	NC_032090.1	-	1167	1167	14.05	10.46	12.8	20.37	22.33	28.44	12.436	23.713	-0.927613	6.9746e-05	1.72248e-05	-0.535876	2.73228e-05	1.81439e-05	-1.0941	2.27211e-16	1.10327e-16	-1.15178	4.1954e-22	1.72653e-22	K01183//chitinase [EC:3.2.1.14]+ko00520//Amino sugar and nucleotide sugar metabolism+ko01100//Metabolic pathways	XP_722560.1|1.8e-233|putative chitinase [Candida albicans SC5314]	GO:0009987//cellular process;GO:1901135//carbohydrate derivative metabolic process;GO:0048869//cellular developmental process;GO:1901565//organonitrogen compound catabolic process;GO:0030154//cell differentiation;GO:0008152//metabolic process;GO:0071704//organic substance metabolic process;GO:0009057//macromolecule catabolic process;GO:0048646//anatomical structure formation involved in morphogen…
3644122	3644122	XM_709113.2	Known_gene	1	180036	181850	NC_032093.1	+	1815	1815	38.37	36.52	33.65	31.72	34.1	31.07	36.18	32.296	0.153224	0.474138	0.375099	0.274586	0.000103865	7.1377e-05	0.098915	0.16686	0.14696	0.115084	0.134303	0.116424	K19953//TBC1 domain family member 6	XP_714206.2|0.0e+00|Rab GTPase-activating protein [Candida albicans SC5314]	GO:0046907//intracellular transport;GO:0009987//cellular process;GO:0051336//regulation of hydrolase activity;GO:0006810//transport;GO:0043547//positive regulation of GTPase activity;GO:0015833//peptide transport;GO:0051179//localization;GO:0071705//nitrogen compound transport;GO:0033036//macromolecule localization;GO:0044093//positive regulation of molecular function;GO:0042886//amide transport;…
3644030	3644030	XM_709208.2	Known_gene	1	178343	181033	NC_032094.1	-	2691	2691	47.75	34.44	41.05	62.58	66.71	68.25	41.08	65.846	-0.685581	0.000381535	0.000112246	-0.390201	2.53236e-18	1.09578e-18	-0.953818	6.3061e-90	1.34327e-90	-0.733447	5.92166e-59	1.50459e-59	K22493//agglutinin-like protein;K11682//SWR1-complex protein 3;K01183//chitinase [EC:3.2.1.14]+ko00520//Amino sugar and nucleotide sugar metabolism+ko01100//Metabolic pathways	XP_714301.2|0.0e+00|hypothetical protein CAALFM_C600910CA [Candida albicans SC5314]	GO:0065007//biological regulation;GO:0009987//cellular process;GO:0019725//cellular homeostasis;GO:0065008//regulation of biological quality;GO:0045454//cell redox homeostasis;GO:0042592//homeostatic process;GO:0050789//regulation of biological process;GO:0050794//regulation of cellular process;GO:0015035//protein disulfide oxidoreductase activity;GO:0016667//oxidoreductase activity, acting on a …
30514976	30514976	XM_019475080.1	Known_gene	1	656446	657201	NC_032089.1	-	756	666	124.94	74.88	72.19	38.41	51.04	68.01	90.67	52.486	0.767859	0.019044	0.00860657	1.70168	2.74607e-85	5.15002e-86	0.552952	2.63611e-09	1.56539e-09	0.0860521	0.405821	0.37411	K00668//fatty acid synthase subunit beta, fungi type [EC:2.3.1.86]+ko01100//Metabolic pathways+ko00061//Fatty acid biosynthesis+ko01212//Fatty acid metabolism	XP_019330625.1|4.3e-126|hypothetical protein CAALFM_C103150CA [Candida albicans SC5314]	GO:0110165//cellular anatomical entity;GO:0016020//membrane;GO:0031224//intrinsic component of membrane;GO:0016021//integral component of membrane;
30514959	30514959	XM_019475063.1	Known_gene	1	198951	199220	NC_032089.1	+	270	270	82.02	91.99	203.68	73.71	156.72	128.84	125.896	119.756	0.0373746	0.944242	0.918175	0.154115	0.423098	0.391316	-0.76864	3.08072e-09	1.8325e-09	0.660724	1.09169e-08	6.3588e-09	NA	XP_019330608.1|5.9e-42|hypothetical protein CAALFM_C100980WA [Candida albicans SC5314]	GO:0043170//macromolecule metabolic process;GO:0008152//metabolic process;GO:0044271//cellular nitrogen compound biosynthetic process;GO:0043604//amide biosynthetic process;GO:0010467//gene expression;GO:0043043//peptide biosynthetic process;GO:1901576//organic substance biosynthetic process;GO:0034641//cellular nitrogen compound metabolic process;GO:0044249//cellular biosynthetic process;GO:0006…
3642312	3642312	XM_710932.1	Known_gene	1	1620414	1621292	NC_032090.1	+	879	879	11.08	14.78	17.85	18.33	18.06	24.41	14.57	20.266	-0.48315	0.0891656	0.0497358	-0.726249	9.03814e-06	5.86034e-06	-0.289152	0.0642638	0.0544018	-0.451548	0.000792879	0.000582968	K17100//dihydroxyacetone synthase [EC:2.2.1.3]+ko00680//Methane metabolism+ko01200//Carbon metabolism;K03142//transcription initiation factor TFIIH subunit 2+ko03420//Nucleotide excision repair+ko03022//Basal transcription factors;K01557//acylpyruvate hydrolase [EC:3.7.1.5]+ko01100//Metabolic pathways+ko00350//Tyrosine metabolism	XP_716025.1|8.6e-167|hypothetical protein CAALFM_C207980WA [Candida albicans SC5314]	GO:0018773//acetylpyruvate hydrolase activity;GO:0003824//catalytic activity;GO:0016823//hydrolase activity, acting on acid carbon-carbon bonds, in ketonic substances;GO:0016787//hydrolase activity;GO:0016822//hydrolase activity, acting on acid carbon-carbon bonds;
3636202	3636202	XM_717058.2	Known_gene	1	2866542	2868221	NC_032089.1	-	1680	1680	26.7	100.97	106.2	63.25	55.02	61.66	77.956	59.976	0.339888	0.491036	0.391898	-1.24423	5.50685e-79	1.08413e-79	0.875899	1.66567e-71	4.02594e-72	0.784377	1.15992e-61	2.8737e-62	K16261//yeast amino acid transporter	XP_722151.1|0.0e+00|hypothetical protein CAALFM_C113130CA [Candida albicans SC5314]	GO:0051234//establishment of localization;GO:0006811//ion transport;GO:0003333//amino acid transmembrane transport;GO:0055085//transmembrane transport;GO:0071702//organic substance transport;GO:0071705//nitrogen compound transport;GO:0006865//amino acid transport;GO:0009987//cellular process;GO:0006810//transport;GO:0006820//anion transport;GO:0051179//localization;GO:0034220//ion transmembrane t…
3639173	ASG7	XM_713992.1	Known_gene	1	519240	519686	NC_032094.1	-	447	447	0.22	0.21	0.43	0.82	0.21	1.23	0.286	0.753	-0.928827	0.384144	0.287549	-1.89812	0.273639	0.247068	0	0.999847	0.99968	-1.51625	0.229036	0.203278	NA	XP_719085.1|1.8e-80|Asg7p [Candida albicans SC5314]	GO:0016020//membrane;GO:0016021//integral component of membrane;GO:0110165//cellular anatomical entity;GO:0031224//intrinsic component of membrane;
3637727	ZCF22	XM_715467.2	Known_gene	1	535546	537645	NC_032093.1	+	2100	2100	14.86	12.38	12.97	18.57	15.6	17	13.403	17.056	-0.357536	0.112643	0.0655478	-0.32154	0.00059172	0.000426346	-0.333535	0.00116414	0.00087558	-0.390356	7.64612e-05	5.30464e-05	K09247//heme activator protein 1;K21632//white-opaque regulator 2;K21547//C6 transcription factor Pro1	XP_720560.2|0.0e+00|Zcf22p [Candida albicans SC5314]	GO:0005622//intracellular;GO:0043231//intracellular membrane-bounded organelle;GO:0043226//organelle;GO:0043229//intracellular organelle;GO:0043227//membrane-bounded organelle;GO:0005634//nucleus;GO:0110165//cellular anatomical entity;GO:0046872//metal ion binding;GO:0008270//zinc ion binding;GO:0005488//binding;GO:0043169//cation binding;GO:0003700//DNA-binding transcription factor activity;GO:0…
3643295	DDI1	XM_709963.1	Known_gene	1	3169830	3170801	NC_032089.1	+	972	972	710.78	527.61	343.87	329.09	487.76	444.47	527.42	420.44	0.323909	0.359637	0.265154	1.11092	0	0	0.1133	1.27581e-05	8.67426e-06	-0.370223	5.34723e-38	1.69807e-38	K11885//DNA damage-inducible protein 1	XP_715056.1|4.2e-175|Ddi1p [Candida albicans SC5314]	GO:0008233//peptidase activity;GO:0004175//endopeptidase activity;GO:0070011//peptidase activity, acting on L-amino acid peptides;GO:0016787//hydrolase activity;GO:0003824//catalytic activity;GO:0140096//catalytic activity, acting on a protein;GO:0004190//aspartic-type endopeptidase activity;GO:0070001//aspartic-type peptidase activity;
3639245	3639245	XM_714022.2	Known_gene	1	573291	575498	NC_032094.1	-	2208	2208	45.25	34.82	32.89	16.37	18.12	15.03	37.653	16.506	1.16503	3.04281e-07	5.03002e-08	1.46686	2.22711e-97	3.85034e-98	0.942333	3.75038e-38	1.26118e-38	1.1298	9.85341e-48	2.78266e-48	NA	XP_719115.2|0.0e+00|hypothetical protein CAALFM_C602790CA [Candida albicans SC5314]	GO:0065007//biological regulation;GO:0080090//regulation of primary metabolic process;GO:0006355//regulation of transcription, DNA-templated;GO:1903506//regulation of nucleic acid-templated transcription;GO:0051171//regulation of nitrogen compound metabolic process;GO:0051252//regulation of RNA metabolic process;GO:0009889//regulation of biosynthetic process;GO:2001141//regulation of RNA biosynth…
3646424	3646424	XM_706875.2	Known_gene	1	839278	840204	NC_032089.1	+	927	927	101.8	76.08	72.29	60.72	68.53	75.32	83.39	68.19	0.280377	0.264497	0.180877	0.745494	2.00139e-28	7.07354e-29	0.150782	0.0359886	0.0297754	-0.0592369	0.367854	0.336842	K07059//uncharacterized protein	XP_711968.2|1.4e-175|hypothetical protein CAALFM_C103990WA [Candida albicans SC5314]	GO:0046914//transition metal ion binding;GO:0043167//ion binding;GO:0046872//metal ion binding;GO:0005488//binding;GO:0008270//zinc ion binding;GO:0043169//cation binding;
3641170	3641170	XM_712097.1	Known_gene	1	1058295	1059131	NC_032092.1	-	837	837	19.98	16.14	23.26	25.44	31.25	33.2	19.793	29.963	-0.607071	0.00833508	0.00337257	-0.348542	0.00943223	0.00735852	-0.953216	9.52056e-13	5.0644e-13	-0.513332	1.77504e-05	1.19539e-05	K09537//DnaJ homolog subfamily C member 17	XP_717190.1|3.0e-153|U2-type spliceosomal complex subunit [Candida albicans SC5314]	GO:1901363//heterocyclic compound binding;GO:0005488//binding;GO:0003676//nucleic acid binding;GO:0097159//organic cyclic compound binding;
3634912	PFK26	XM_718346.2	Known_gene	1	1948142	1951585	NC_032089.1	+	3444	3444	53.5	39.74	40.81	36.97	39.02	42.14	44.683	39.376	0.173933	0.45782	0.359069	0.533184	2.43157e-34	7.8285e-35	0.0263781	0.593107	0.5659	-0.0462676	0.313916	0.284052	K00900//6-phosphofructo-2-kinase [EC:2.7.1.105]+ko00051//Fructose and mannose metabolism	XP_723439.2|0.0e+00|Pfk26p [Candida albicans SC5314]	GO:0006793//phosphorus metabolic process;GO:0006003//fructose 2,6-bisphosphate metabolic process;GO:0019318//hexose metabolic process;GO:0006000//fructose metabolic process;GO:0044281//small molecule metabolic process;GO:0008152//metabolic process;GO:0009987//cellular process;GO:0005975//carbohydrate metabolic process;GO:0019637//organophosphate metabolic process;GO:1901135//carbohydrate derivati…
3634941	IPT1	XM_718362.2	Known_gene	1	1991466	1993010	NC_032089.1	+	1545	1545	22.74	21.32	21.44	56.2	90.44	82.94	21.833	76.526	-1.78853	5.49248e-16	3.11481e-17	-1.30534	3.28198e-69	7.11716e-70	-2.08475	2.06199e-215	2.42486e-216	-1.95176	3.74489e-180	4.81058e-181	K22725//mannosylinositol phosphoceramide inositolphosphotransferase [EC:2.7.1.-]	XP_723455.2|4.3e-307|inositolphosphotransferase [Candida albicans SC5314]	GO:0006629//lipid metabolic process;GO:0090609//single-species submerged biofilm formation;GO:1901576//organic substance biosynthetic process;GO:0051641//cellular localization;GO:0098630//aggregation of unicellular organisms;GO:0071704//organic substance metabolic process;GO:0006643//membrane lipid metabolic process;GO:0036180//filamentous growth of a population of unicellular organisms in respon…
3646614	NMD3	XM_706687.2	Known_gene	1	1443567	1445129	NC_032096.1	+	1563	1563	448.83	526.84	456.1	401.18	338.38	336.08	477.256	358.546	0.395363	0.0715108	0.0381518	0.161919	1.72688e-13	8.39566e-14	0.638721	2.3839e-196	2.96248e-197	0.440545	1.20628e-85	2.47808e-86	K07562//nonsense-mediated mRNA decay protein 3+ko03013//RNA transport+ko03008//Ribosome biogenesis in eukaryotes	XP_002422186.1|6.4e-298|60S ribosomal export protein NMD3 [Candida dubliniensis CD36]	GO:0051234//establishment of localization;GO:0071705//nitrogen compound transport;GO:0071702//organic substance transport;GO:0045184//establishment of protein localization;GO:0042886//amide transport;GO:0015031//protein transport;GO:0006810//transport;GO:0033036//macromolecule localization;GO:0008104//protein localization;GO:0015833//peptide transport;GO:0051179//localization;GO:0110165//cellular…
3635789	3635789	XM_717454.2	Known_gene	1	354235	355758	NC_032090.1	-	1524	1524	30.68	33.58	39.13	22.48	26.62	22.31	34.463	23.803	0.512979	0.0100345	0.00417202	0.448656	4.62257e-07	2.82328e-07	0.335092	5.45158e-05	3.81474e-05	0.810585	1.61438e-22	6.59256e-23	K11360//transcriptional activator SPT8;K14823//rRNA-processing protein EBP2;K21646//glycolytic genes transcriptional activator GCR1;K06062//histone acetyltransferase [EC:2.3.1.48]	XP_722547.2|1.7e-295|hypothetical protein CAALFM_C201900CA [Candida albicans SC5314]	NA
3641230	3641230	XM_712075.2	Known_gene	1	2217265	2220897	NC_032090.1	-	3633	3633	62.83	58.64	51.07	38.55	34.96	38.19	57.513	37.233	0.614249	0.00216771	0.000745882	0.704723	8.84754e-69	1.93337e-69	0.74618	2.06408e-71	4.99236e-72	0.419281	1.10368e-22	4.4905e-23	NA	XP_717168.2|0.0e+00|tRNA methylation protein [Candida albicans SC5314]	GO:0043412//macromolecule modification;GO:0071704//organic substance metabolic process;GO:0010467//gene expression;GO:0034660//ncRNA metabolic process;GO:0006807//nitrogen compound metabolic process;GO:0009451//RNA modification;GO:0046483//heterocycle metabolic process;GO:0032259//methylation;GO:1901360//organic cyclic compound metabolic process;GO:0043170//macromolecule metabolic process;GO:0034…
3641926	3641926	XM_711345.1	Known_gene	1	1936663	1938141	NC_032096.1	-	1479	1479	4.15	8.52	17.55	26.95	16.25	42.47	10.073	28.556	-1.44208	0.00286464	0.00101446	-2.6991	3.45493e-83	6.57726e-84	-0.931514	2.67997e-12	1.44705e-12	-1.27497	1.44705e-48	4.04316e-49	NA	XP_716438.1|3.9e-281|hypothetical protein CAALFM_CR09070CA [Candida albicans SC5314]	GO:0016021//integral component of membrane;GO:0016020//membrane;GO:0110165//cellular anatomical entity;GO:0031224//intrinsic component of membrane;
30515187	HRT1	XM_019475298.1	Known_gene	1	536423	536868	NC_032091.1	+	446	372	32.96	22.28	32.42	42.26	47.88	51.15	29.22	47.096	-0.701237	0.00852798	0.00346338	-0.358577	0.0409142	0.0336704	-1.10367	8.05144e-09	4.84698e-09	-0.65785	8.17219e-05	5.6805e-05	K03868//RING-box protein 1 [EC:2.3.2.32]+ko04141//Protein processing in endoplasmic reticulum+ko03420//Nucleotide excision repair+ko04120//Ubiquitin mediated proteolysis+ko04111//Cell cycle - yeast	XP_019330843.1|1.7e-71|SCF ubiquitin ligase complex subunit [Candida albicans SC5314]	GO:0022402//cell cycle process;GO:0019941//modification-dependent protein catabolic process;GO:0000082//G1/S transition of mitotic cell cycle;GO:0008152//metabolic process;GO:0009987//cellular process;GO:0043161//proteasome-mediated ubiquitin-dependent protein catabolic process;GO:0019538//protein metabolic process;GO:0000278//mitotic cell cycle;GO:0071704//organic substance metabolic process;GO:…
3644934	IDP2	XM_708328.2	Known_gene	1	525541	526779	NC_032096.1	+	1239	1239	340.6	206.17	155.24	1063.17	1176.38	629.94	234.003	956.496	-1.96983	4.32588e-08	6.33091e-09	-1.64222	0	0	-2.51245	0	0	-2.02071	0	0	K00031//isocitrate dehydrogenase [EC:1.1.1.42]+ko04146//Peroxisome+ko00020//Citrate cycle (TCA cycle)+ko01100//Metabolic pathways+ko01230//Biosynthesis of amino acids+ko01130//Biosynthesis of antibiotics+ko01110//Biosynthesis of secondary metabolites+ko01210//2-Oxocarboxylic acid metabolism+ko01200//Carbon metabolism+ko00480//Glutathione metabolism	XP_713421.2|2.2e-237|isocitrate dehydrogenase (NADP(+)) [Candida albicans SC5314]	GO:0008152//metabolic process;GO:0019752//carboxylic acid metabolic process;GO:0006099//tricarboxylic acid cycle;GO:0006082//organic acid metabolic process;GO:0006102//isocitrate metabolic process;GO:0009060//aerobic respiration;GO:0006091//generation of precursor metabolites and energy;GO:0006066//alcohol metabolic process;GO:0055114//oxidation-reduction process;GO:0006739//NADP metabolic proces…
3645010	3645010	XM_708263.2	Known_gene	1	74264	77572	NC_032092.1	-	3309	3309	39.44	29.88	29.17	40.34	34.49	38.7	32.83	37.843	-0.211808	0.399018	0.301944	-0.0325515	0.499532	0.466918	-0.206998	9.15018e-05	6.47152e-05	-0.407848	1.85713e-15	8.87724e-16	K15505//DNA repair protein RAD5 [EC:3.6.4.-]	XP_713356.2|0.0e+00|translocase [Candida albicans SC5314]	GO:0110165//cellular anatomical entity;GO:0005622//intracellular;GO:0005737//cytoplasm;GO:0017076//purine nucleotide binding;GO:0032559//adenyl ribonucleotide binding;GO:0035639//purine ribonucleoside triphosphate binding;GO:0032555//purine ribonucleotide binding;GO:0036094//small molecule binding;GO:0043168//anion binding;GO:0043167//ion binding;GO:0000166//nucleotide binding;GO:1901363//heteroc…
3647448	3647448	XM_705867.1	Known_gene	1	858499	859104	NC_032093.1	-	606	606	211.89	157.71	171.52	249.63	242.19	252.81	180.373	248.21	-0.472284	0.0221407	0.0102327	-0.236476	1.8008e-06	1.13315e-06	-0.618865	2.28238e-29	8.60794e-30	-0.559677	1.16597e-26	4.40978e-27	K14566//U3 small nucleolar RNA-associated protein 24+ko03008//Ribosome biogenesis in eukaryotes	XP_710959.1|1.0e-110|rRNA-processing protein [Candida albicans SC5314]	GO:0032991//protein-containing complex;GO:0005730//nucleolus;GO:0043231//intracellular membrane-bounded organelle;GO:0005634//nucleus;GO:0043228//non-membrane-bounded organelle;GO:0043227//membrane-bounded organelle;GO:0043226//organelle;GO:0032040//small-subunit processome;GO:0031981//nuclear lumen;GO:0031974//membrane-enclosed lumen;GO:1990904//ribonucleoprotein complex;GO:0043232//intracellula…
3643309	3643309	XM_709944.1	Known_gene	1	3145303	3146106	NC_032089.1	+	804	804	22.19	27.67	27.04	26.21	24.03	28.96	25.633	26.4	-0.0557728	0.84251	0.783101	-0.240208	0.0708538	0.0597844	0.203486	0.124	0.10766	-0.0989665	0.411067	0.379288	K14263//kynurenine formamidase [EC:3.5.1.9]+ko00380//Tryptophan metabolism+ko01100//Metabolic pathways+ko00630//Glyoxylate and dicarboxylate metabolism	XP_715037.1|8.7e-150|arylformamidase [Candida albicans SC5314]	GO:0009987//cellular process;GO:1901361//organic cyclic compound catabolic process;GO:1901606//alpha-amino acid catabolic process;GO:0072524//pyridine-containing compound metabolic process;GO:1901293//nucleoside phosphate biosynthetic process;GO:0034641//cellular nitrogen compound metabolic process;GO:0019359//nicotinamide nucleotide biosynthetic process;GO:1901575//organic substance catabolic pr…
3645759	3645759	XM_707524.2	Known_gene	1	135543	138761	NC_032092.1	-	3219	3219	24.45	22.4	23.48	34.94	39.36	43.26	23.443	39.186	-0.743076	5.79184e-06	1.18283e-06	-0.515045	2.56089e-20	1.0578e-20	-0.813231	1.65682e-49	4.85854e-50	-0.881601	9.68382e-62	2.39756e-62	K21845//cargo-transport protein YPP1	XP_712617.2|0.0e+00|hypothetical protein CAALFM_C400780CA [Candida albicans SC5314]	NA
3645408	SWI4	XM_019475068.1	Known_gene	1	372225	375440	NC_032089.1	+	3216	3060	12.87	17.14	27.86	39.95	37.25	29.61	19.29	35.603	-0.895215	0.0040359	0.0014867	-1.63418	9.07341e-141	1.212e-141	-1.11987	5.95863e-75	1.40343e-75	-0.0878892	0.136062	0.117972	K06649//regulatory protein SWI4+ko04011//MAPK signaling pathway - yeast+ko04113//Meiosis - yeast+ko04111//Cell cycle - yeast	XP_019330613.1|0.0e+00|SBF complex DNA-binding subunit [Candida albicans SC5314]	GO:1902680//positive regulation of RNA biosynthetic process;GO:0051173//positive regulation of nitrogen compound metabolic process;GO:0010468//regulation of gene expression;GO:1903047//mitotic cell cycle process;GO:0009891//positive regulation of biosynthetic process;GO:0051252//regulation of RNA metabolic process;GO:0051254//positive regulation of RNA metabolic process;GO:0031325//positive regul…
3645318	3645318	XM_707920.2	Known_gene	1	2568686	2572051	NC_032089.1	+	3366	3366	59.11	50.02	33.09	79.05	69.25	65.34	47.406	71.213	-0.578321	0.0553831	0.0284983	-0.419363	3.19767e-32	1.06305e-32	-0.469309	1.05573e-34	3.7263e-35	-0.981571	1.53972e-115	2.67566e-116	K07126//uncharacterized protein	XP_713013.2|0.0e+00|hypothetical protein CAALFM_C111730WA [Candida albicans SC5314]	NA
3636401	3636401	XM_716845.2	Known_gene	1	1157179	1158453	NC_032093.1	+	1275	1275	21.56	37.11	46.6	29.97	26.27	24.45	35.09	26.896	0.348461	0.306319	0.21666	-0.475162	1.4991e-06	9.4006e-07	0.498392	2.23584e-08	1.36687e-08	0.930495	1.66713e-27	6.22466e-28	K02684//DNA primase small subunit [EC:2.7.7.102]+ko03030//DNA replication	XP_721938.2|5.6e-252|DNA primase subunit [Candida albicans SC5314]	GO:0006139//nucleobase-containing compound metabolic process;GO:0006259//DNA metabolic process;GO:1901362//organic cyclic compound biosynthetic process;GO:0018130//heterocycle biosynthetic process;GO:0044238//primary metabolic process;GO:0032774//RNA biosynthetic process;GO:0043170//macromolecule metabolic process;GO:0006260//DNA replication;GO:0046483//heterocycle metabolic process;GO:0034654//n…
30515330	30515330	XM_019475450.1	Known_gene	1	237854	238266	NC_032094.1	+	413	348	137.36	121.83	182.97	245.23	252.5	264.74	147.386	254.156	-0.808723	7.28445e-05	1.81475e-05	-0.836174	4.99636e-24	1.91067e-24	-1.05141	3.04452e-34	1.07815e-34	-0.532969	6.36287e-13	3.2355e-13	NA	XP_019330995.1|5.2e-59|hypothetical protein CAALFM_C601210WA [Candida albicans SC5314]	NA
3639239	HPD1	XM_714034.2	Known_gene	1	597534	598598	NC_032094.1	-	1065	1065	14.72	11.61	7.21	24.25	26.62	35.08	11.18	28.65	-1.3154	5.09846e-05	1.23116e-05	-0.720207	1.31899e-08	7.5374e-09	-1.19714	5.41625e-20	2.4276e-20	-2.28258	2.43796e-62	5.99944e-63	K00020//3-hydroxyisobutyrate dehydrogenase [EC:1.1.1.31]+ko00280//Valine, leucine and isoleucine degradation+ko01100//Metabolic pathways;K23146//3-hydroxypropionate dehydrogenase [EC:1.1.1.59]+ko00410//beta-Alanine metabolism+ko00640//Propanoate metabolism	XP_719127.2|6.9e-203|Hpd1p [Candida albicans SC5314]	GO:0006790//sulfur compound metabolic process;GO:0006082//organic acid metabolic process;GO:0033865//nucleoside bisphosphate metabolic process;GO:0043436//oxoacid metabolic process;GO:0006195//purine nucleotide catabolic process;GO:1901575//organic substance catabolic process;GO:0033869//nucleoside bisphosphate catabolic process;GO:1901135//carbohydrate derivative metabolic process;GO:0034654//nu…
3637973	3637973	XM_715306.1	Known_gene	1	19179	19871	NC_032095.1	+	693	693	266.1	273.5	336.11	290.53	346.56	327.85	291.903	321.646	-0.157037	0.407485	0.310239	-0.126719	0.00194135	0.0014447	-0.341564	2.47845e-17	1.17659e-17	0.0358976	0.521624	0.490858	K01783//ribulose-phosphate 3-epimerase [EC:5.1.3.1]+ko00030//Pentose phosphate pathway+ko01100//Metabolic pathways+ko01230//Biosynthesis of amino acids+ko00040//Pentose and glucuronate interconversions+ko01130//Biosynthesis of antibiotics+ko01110//Biosynthesis of secondary metabolites+ko01200//Carbon metabolism	XP_720399.1|3.0e-130|ribulose-phosphate 3-epimerase [Candida albicans SC5314]	GO:0051156//glucose 6-phosphate metabolic process;GO:0009052//pentose-phosphate shunt, non-oxidative branch;GO:0044281//small molecule metabolic process;GO:0055114//oxidation-reduction process;GO:1901135//carbohydrate derivative metabolic process;GO:0005996//monosaccharide metabolic process;GO:0006098//pentose-phosphate shunt;GO:0019321//pentose metabolic process;GO:0044282//small molecule catabo…
3645201	3645201	XM_708052.2	Known_gene	1	1517213	1518205	NC_032090.1	-	993	993	121.98	108.27	89	106.52	103.31	111.77	106.416	107.2	-0.0173628	0.954425	0.930616	0.19552	0.000451953	0.000322856	0.0676536	0.244646	0.219998	-0.328656	6.29855e-09	3.6404e-09	K01240//uridine nucleosidase [EC:3.2.2.3]+ko00760//Nicotinate and nicotinamide metabolism+ko00240//Pyrimidine metabolism	XP_713145.2|3.1e-189|trifunctional uridine nucleosidase/nicotinamide riboside hydrolase/nicotinic acid riboside hydrolase [Candida albicans SC5314]	GO:0006152//purine nucleoside catabolic process;GO:0044270//cellular nitrogen compound catabolic process;GO:0044248//cellular catabolic process;GO:0034656//nucleobase-containing small molecule catabolic process;GO:0006725//cellular aromatic compound metabolic process;GO:0008152//metabolic process;GO:0044281//small molecule metabolic process;GO:0009164//nucleoside catabolic process;GO:1901575//org…
3634937	3634937	XM_019475135.1	Known_gene	1	1901480	1902264	NC_032089.1	+	785	723	118.5	86.76	106.9	79.19	84.76	71.19	104.053	78.38	0.385016	0.0851802	0.047102	0.581497	2.85739e-16	1.30163e-16	0.0336465	0.674804	0.651504	0.586515	6.00986e-15	2.9058e-15	NA	XP_019330680.1|6.0e-134|hypothetical protein CAALFM_C108710WA [Candida albicans SC5314]	NA
3635158	3635158	XM_718102.1	Known_gene	1	1097924	1098925	NC_032091.1	+	1002	1002	47.28	24.6	23.05	32.8	45.88	45.35	31.643	41.343	-0.374935	0.314842	0.224206	0.527534	9.90593e-09	5.63932e-09	-0.899207	4.41221e-20	1.96875e-20	-0.976336	1.10289e-22	4.48542e-23	NA	XP_723195.1|4.5e-188|hypothetical protein CAALFM_C305110WA [Candida albicans SC5314]	GO:0040007//growth;GO:0030447//filamentous growth;GO:0031224//intrinsic component of membrane;GO:0110165//cellular anatomical entity;GO:0016020//membrane;GO:0016021//integral component of membrane;
3640154	HDA1	XM_713178.1	Known_gene	1	449417	451918	NC_032096.1	-	2502	2502	33.13	41.94	48.2	28.16	23.73	26.52	41.09	26.136	0.626902	0.00420358	0.00155583	0.234491	0.00023323	0.000163929	0.821615	1.93282e-41	6.245e-42	0.861952	8.44551e-51	2.31752e-51	K11407//histone deacetylase 6 [EC:3.5.1.98]	XP_718271.1|0.0e+00|histone deacetylase [Candida albicans SC5314]	GO:0009405//pathogenesis;GO:0033554//cellular response to stress;GO:0050789//regulation of biological process;GO:1900445//positive regulation of filamentous growth of a population of unicellular organisms in response to biotic stimulus;GO:0009267//cellular response to starvation;GO:0060255//regulation of macromolecule metabolic process;GO:0006950//response to stress;GO:0009987//cellular process;G…
3640588	3640588	XM_712689.1	Known_gene	1	74962	76422	NC_032091.1	-	1461	1461	10.78	10.96	13.65	16.1	21.14	22.4	11.796	19.88	-0.754907	0.00055564	0.000168642	-0.578704	5.86054e-06	3.7707e-06	-0.947728	8.91117e-16	4.3939e-16	-0.714598	8.60487e-11	4.67232e-11	K16794//platelet-activating factor acetylhydrolase IB subunit alpha+ko01100//Metabolic pathways+ko00565//Ether lipid metabolism	XP_717782.1|1.3e-284|hypothetical protein CAALFM_C300530CA [Candida albicans SC5314]	GO:0051648//vesicle localization;GO:0051647//nucleus localization;GO:0065009//regulation of molecular function;GO:0099518//vesicle cytoskeletal trafficking;GO:0051650//establishment of vesicle localization;GO:0051336//regulation of hydrolase activity;GO:0051649//establishment of localization in cell;GO:0022402//cell cycle process;GO:0071840//cellular component organization or biogenesis;GO:000998…
3639230	3639230	XM_714093.2	Known_gene	1	710076	711305	NC_032094.1	+	1230	1230	298.38	223.67	204.47	156.5	125.51	71	242.173	117.67	0.988281	0.0045224	0.00168847	0.930988	2.00108e-162	2.3797e-163	0.833569	1.97101e-102	3.90256e-103	1.526	2.79717e-243	2.8242e-244	K11841//ubiquitin carboxyl-terminal hydrolase 10 [EC:3.4.19.12]+ko04139//Mitophagy - yeast	XP_719186.2|2.3e-234|hypothetical protein CAALFM_C603370WA [Candida albicans SC5314]	NA
3639031	MSS51	XM_714246.1	Known_gene	1	2144900	2146207	NC_032096.1	-	1308	1308	87.58	76.96	151.19	96.99	103.69	98.31	105.243	99.663	0.0473169	0.893035	0.847445	-0.147235	0.00373143	0.00282778	-0.430096	8.21683e-17	3.95148e-17	0.620953	2.31288e-44	6.77448e-45	K17656//mitochondrial splicing suppressor protein 51	XP_719339.1|4.3e-263|Mss51p [Candida albicans SC5314]	GO:0065007//biological regulation;GO:0050789//regulation of biological process;GO:0019222//regulation of metabolic process;GO:0070131//positive regulation of mitochondrial translation;GO:0032270//positive regulation of cellular protein metabolic process;GO:0034248//regulation of cellular amide metabolic process;GO:0034250//positive regulation of cellular amide metabolic process;GO:0062125//regula…
3646949	3646949	XM_706350.2	Known_gene	1	1169089	1170171	NC_032092.1	-	1083	1083	3.3	3.26	5.58	2.7	5.21	5.31	4.046	4.406	-0.131556	0.785539	0.713154	0.289507	0.392037	0.360956	-0.676411	0.0139421	0.0112002	0.0715533	0.794284	0.773772	K17666//protein PET54, mitochondrial	XP_711442.2|5.9e-202|hypothetical protein CAALFM_C405360CA [Candida albicans SC5314]	NA
3638919	3638919	XM_714265.1	Known_gene	1	2179388	2180371	NC_032096.1	+	984	984	7.46	5.51	11.25	0.23	0.31	0.3	8.073	0.28	4.42816	3.55725e-18	1.66829e-19	5.01947	3.52033e-25	1.32218e-25	4.15171	7.5818e-17	3.6423e-17	5.22882	5.37145e-38	1.70666e-38	NA	XP_719358.1|5.0e-192|hypothetical protein CAALFM_CR10200WA [Candida albicans SC5314]	GO:0005737//cytoplasm;GO:0005622//intracellular;GO:0110165//cellular anatomical entity;GO:0016853//isomerase activity;GO:0003824//catalytic activity;GO:0016868//intramolecular transferase activity, phosphotransferases;GO:0016866//intramolecular transferase activity;
3635164	3635164	XM_718083.1	Known_gene	1	1068899	1072126	NC_032091.1	-	3228	3228	24.49	11.56	13.52	46.21	53.44	45.65	16.523	48.433	-1.52012	8.9382e-07	1.60837e-07	-0.916012	3.12331e-70	6.70024e-71	-2.20878	3.66543e-300	3.29552e-301	-1.75552	1.24537e-187	1.53752e-188	K10597//ubiquitin conjugation factor E4 B [EC:2.3.2.27]+ko04141//Protein processing in endoplasmic reticulum+ko04120//Ubiquitin mediated proteolysis	XP_723176.1|0.0e+00|ubiquitin-ubiquitin ligase [Candida albicans SC5314]	GO:1901564//organonitrogen compound metabolic process;GO:0019538//protein metabolic process;GO:0010243//response to organonitrogen compound;GO:0043170//macromolecule metabolic process;GO:0051716//cellular response to stimulus;GO:0016567//protein ubiquitination;GO:0032446//protein modification by small protein conjugation;GO:0009056//catabolic process;GO:0033554//cellular response to stress;GO:190…
3648348	GLK1	XM_705084.2	Known_gene	1	1559026	1560444	NC_032096.1	+	1419	1419	406.91	350.61	447.91	117.81	211.44	241.69	401.81	190.313	1.05414	0.000113977	2.95888e-05	1.78825	0	0	0.729619	5.95437e-149	9.06812e-150	0.890051	1.91788e-263	1.79901e-264	K00844//hexokinase [EC:2.7.1.1]+ko00010//Glycolysis / Gluconeogenesis+ko00520//Amino sugar and nucleotide sugar metabolism+ko01100//Metabolic pathways+ko01130//Biosynthesis of antibiotics+ko00052//Galactose metabolism+ko00051//Fructose and mannose metabolism+ko00500//Starch and sucrose metabolism+ko01110//Biosynthesis of secondary metabolites+ko01200//Carbon metabolism	XP_710176.2|8.1e-268|glucokinase [Candida albicans SC5314]	GO:0006796//phosphate-containing compound metabolic process;GO:0016310//phosphorylation;GO:0009150//purine ribonucleotide metabolic process;GO:0001678//cellular glucose homeostasis;GO:0055082//cellular chemical homeostasis;GO:0009259//ribonucleotide metabolic process;GO:0009185//ribonucleoside diphosphate metabolic process;GO:0019693//ribose phosphate metabolic process;GO:0055086//nucleobase-cont…
3647694	3647694	XM_705618.2	Known_gene	1	556957	560259	NC_032096.1	+	3303	3303	127.62	97.23	83.9	37.74	29.86	21.54	102.916	29.713	1.73395	5.20127e-09	6.72973e-10	1.75769	0	0	1.70319	0	0	1.96165	0	0	K11771//SWI/SNF chromatin-remodeling complex subunit SWI1;K15158//mediator of RNA polymerase II transcription subunit 15, fungi type	XP_710710.2|0.0e+00|hypothetical protein CAALFM_CR02510WA [Candida albicans SC5314]	GO:0042221//response to chemical;GO:0010468//regulation of gene expression;GO:0009987//cellular process;GO:0019222//regulation of metabolic process;GO:0050789//regulation of biological process;GO:0051716//cellular response to stimulus;GO:0042493//response to drug;GO:0050896//response to stimulus;GO:0070887//cellular response to chemical stimulus;GO:0060255//regulation of macromolecule metabolic p…
3644716	3644716	XM_708563.1	Known_gene	1	871931	872323	NC_032089.1	+	393	393	184.8	316.97	317.14	185.12	174.81	209.62	272.97	189.85	0.49113	0.0816968	0.0448633	-0.00249601	0.832848	0.814954	0.858559	1.02795e-36	3.5271e-37	0.597343	3.96278e-19	1.74106e-19	K11252//histone H2B	XP_713656.1|4.7e-64|hypothetical protein CAALFM_C104180WA [Candida albicans SC5314]	GO:0016043//cellular component organization;GO:0022607//cellular component assembly;GO:0071103//DNA conformation change;GO:0071824//protein-DNA complex subunit organization;GO:0034728//nucleosome organization;GO:0044085//cellular component biogenesis;GO:0006334//nucleosome assembly;GO:0006996//organelle organization;GO:0034622//cellular protein-containing complex assembly;GO:0071840//cellular com…
3644783	SAP7	XM_708473.2	Known_gene	1	1012991	1014757	NC_032089.1	+	1767	1767	1.17	1.05	1.25	0.24	0.16	0.08	1.156	0.16	2.54493	1.90304e-05	4.25359e-06	2.2854	8.53819e-05	5.84334e-05	2.71425	4.88799e-05	3.41222e-05	3.96578	1.09479e-07	6.65774e-08	K06005//candidapepsin [EC:3.4.23.24]	XP_713566.2|0.0e+00|Sap7p [Candida albicans SC5314]	GO:0009405//pathogenesis;GO:1901564//organonitrogen compound metabolic process;GO:0030163//protein catabolic process;GO:0071852//fungal-type cell wall organization or biogenesis;GO:0009987//cellular process;GO:0044419//interspecies interaction between organisms;GO:1901565//organonitrogen compound catabolic process;GO:1901575//organic substance catabolic process;GO:0009057//macromolecule catabolic…
3643896	PGA46	XM_709386.2	Known_gene	1	1700273	1701295	NC_032090.1	-	1023	1023	0.15	0.89	0.53	3.1	4.08	1.74	0.523	2.973	-2.24395	0.000239887	6.69433e-05	-4.36923	1.89353e-10	1.01993e-10	-2.19669	9.78626e-08	6.1509e-08	-1.71502	0.00415324	0.00319624	K11294//nucleolin	XP_714479.2|1.4e-189|Pga46p [Candida albicans SC5314]	GO:0031225//anchored component of membrane;GO:0005576//extracellular region;GO:0016020//membrane;GO:0005886//plasma membrane;GO:0071944//cell periphery;GO:0110165//cellular anatomical entity;GO:0031224//intrinsic component of membrane;
3641245	3641245	XM_712049.1	Known_gene	1	2187377	2187721	NC_032090.1	+	345	345	112.17	52.04	62.36	64.03	59.22	54.15	75.523	59.133	0.318705	0.409703	0.312541	0.808867	2.76901e-10	1.50211e-10	-0.186464	0.245878	0.22127	0.20366	0.25052	0.223264	NA	XP_717142.1|2.5e-61|hypothetical protein CAALFM_C210600WA [Candida albicans SC5314]	NA
3641133	3641133	XM_712118.2	Known_gene	1	1015865	1017364	NC_032092.1	+	1500	1500	72.22	64.86	58.29	54.72	58.18	53.88	65.123	55.593	0.217686	0.320324	0.229282	0.40033	4.37962e-12	2.23212e-12	0.156806	0.00777549	0.00613868	0.113499	0.079328	0.067327	NA	XP_717211.2|1.3e-287|glucose-induced degradation complex subunit [Candida albicans SC5314]	NA
3646517	ALG1	XM_706765.1	Known_gene	1	1331712	1333082	NC_032092.1	+	1371	1371	27.15	18.15	21.11	25	38.71	40.78	22.136	34.83	-0.64508	0.020256	0.00924708	0.119024	0.233977	0.208958	-1.09274	1.87204e-32	6.76996e-33	-0.949935	2.14363e-27	8.01808e-28	K03842//beta-1,4-mannosyltransferase [EC:2.4.1.142]+ko01100//Metabolic pathways+ko00513//Various types of N-glycan biosynthesis+ko00510//N-Glycan biosynthesis	XP_711858.1|7.9e-268|chitobiosyldiphosphodolichol beta-1,4 mannosyltransferase [Candida albicans SC5314]	GO:1901137//carbohydrate derivative biosynthetic process;GO:0043170//macromolecule metabolic process;GO:0009987//cellular process;GO:0009101//glycoprotein biosynthetic process;GO:0071704//organic substance metabolic process;GO:0044238//primary metabolic process;GO:0006486//protein glycosylation;GO:0006807//nitrogen compound metabolic process;GO:0043413//macromolecule glycosylation;GO:0009058//bio…
3640163	3640163	XM_713154.2	Known_gene	1	409235	410230	NC_032096.1	-	996	996	3.64	2.68	4.33	1.79	2.07	3.44	3.55	2.433	0.508077	0.263347	0.179827	1.02398	0.00531815	0.00407542	0.372602	0.342358	0.314318	0.331958	0.290647	0.261544	K17741//NADPH-dependent methylglyoxal reductase [EC:1.1.1.283]+ko04011//MAPK signaling pathway - yeast+ko00640//Propanoate metabolism+ko00620//Pyruvate metabolism	XP_718247.2|4.0e-189|hypothetical protein CAALFM_CR01810CA [Candida albicans SC5314]	GO:0003824//catalytic activity;GO:0016616//oxidoreductase activity, acting on the CH-OH group of donors, NAD or NADP as acceptor;GO:0016614//oxidoreductase activity, acting on CH-OH group of donors;GO:0016491//oxidoreductase activity;
3642475	3642475	XM_710780.2	Known_gene	1	1109135	1110883	NC_032089.1	+	1749	1749	15.35	15.2	16.46	14.86	17.44	18.45	15.67	16.916	-0.118955	0.579846	0.480854	0.0468045	0.701772	0.675122	-0.198329	0.0607431	0.0513302	-0.164656	0.105617	0.0904312	K22193//golgi pH regulator	XP_715873.2|0.0e+00|hypothetical protein CAALFM_C105280WA [Candida albicans SC5314]	GO:0031224//intrinsic component of membrane;GO:0016021//integral component of membrane;GO:0110165//cellular anatomical entity;GO:0016020//membrane;
3640267	PBP2	XM_713013.2	Known_gene	1	853685	855274	NC_032094.1	-	1590	1590	180.6	158.13	198.11	200.91	193.72	191.07	178.946	195.233	-0.142849	0.443624	0.344541	-0.153751	1.08461e-06	6.75082e-07	-0.292862	8.82748e-19	4.04636e-19	0.0522004	0.137678	0.119487	K18738//heterogeneous nuclear rnp K-like protein	XP_718106.1|1.7e-306|Pbp2p [Candida albicans SC5314]	GO:0005488//binding;GO:0003676//nucleic acid binding;GO:0097159//organic cyclic compound binding;GO:0003723//RNA binding;GO:1901363//heterocyclic compound binding;
3635851	3635851	XM_717473.2	Known_gene	1	398041	401169	NC_032090.1	-	3129	3129	2.41	3.49	3.35	23.19	24.49	20.2	3.083	22.626	-2.84644	4.70474e-36	7.74604e-38	-3.2664	1.92026e-191	2.00534e-192	-2.81089	1.51377e-176	2.01752e-177	-2.59212	6.0424e-132	9.64448e-133	NA	XP_722566.2|0.0e+00|hypothetical protein CAALFM_C202050CA [Candida albicans SC5314]	NA
3642095	SSB1	XM_711115.2	Known_gene	1	1762392	1764233	NC_032096.1	+	1842	1842	1480.2	2092.12	2226.16	1936.38	1801.72	1753.55	1932.83	1830.55	0.0600417	0.828728	0.767122	-0.38757	0	0	0.215591	1.82194e-123	3.18194e-124	0.344279	0	0	K03283//heat shock 70kDa protein 1/2/6/8+ko03040//Spliceosome+ko04144//Endocytosis+ko04141//Protein processing in endoplasmic reticulum+ko04213//Longevity regulating pathway - multiple species	EMG48146.1|0.0e+00|Heat shock protein SSB1 [Candida maltosa Xu316]	GO:0045184//establishment of protein localization;GO:0071840//cellular component organization or biogenesis;GO:0007154//cell communication;GO:0044237//cellular metabolic process;GO:0051656//establishment of organelle localization;GO:0050658//RNA transport;GO:1901360//organic cyclic compound metabolic process;GO:0044249//cellular biosynthetic process;GO:0006414//translational elongation;GO:0050896…
3643490	PRE2	XM_709731.1,BGI_novel_T000060	Known_gene	2	1395463	1397733	NC_032090.1	-	2271	1878	425.73	285.63	277.11	221.92	262.49	247.17	329.49	243.86	0.447373	0.076689	0.0416031	0.939899	1.29251e-274	9.98876e-276	0.121885	8.3136e-08	5.2142e-08	0.164955	3.85589e-36	1.25596e-36	K02737//20S proteasome subunit beta 5 [EC:3.4.25.1]+ko03050//Proteasome;K02737//20S proteasome subunit beta 5 [EC:3.4.25.1]+ko03050//Proteasome	XP_714824.1|6.6e-164|proteasome core particle subunit beta 5 [Candida albicans SC5314]	GO:0044237//cellular metabolic process;GO:0044267//cellular protein metabolic process;GO:0009987//cellular process;GO:0043161//proteasome-mediated ubiquitin-dependent protein catabolic process;GO:0044265//cellular macromolecule catabolic process;GO:0051603//proteolysis involved in cellular protein catabolic process;GO:0006511//ubiquitin-dependent protein catabolic process;GO:0044260//cellular mac…
3647834	3647834	XM_705469.2	Known_gene	1	892609	894141	NC_032094.1	+	1533	1533	30.85	30.5	45.55	15.06	25.06	21.78	35.633	20.633	0.760198	0.00432543	0.00160702	1.03455	8.55684e-27	3.11974e-27	0.283423	0.00100001	0.000749968	1.06445	1.31566e-40	4.02678e-41	K14997//solute carrier family 38 (sodium-coupled neutral amino acid transporter), member 11	XP_710561.2|1.5e-291|aspartate/glutamate transporter [Candida albicans SC5314]	GO:0034220//ion transmembrane transport;GO:0003333//amino acid transmembrane transport;GO:0051179//localization;GO:0098656//anion transmembrane transport;GO:0071702//organic substance transport;GO:1903825//organic acid transmembrane transport;GO:0006811//ion transport;GO:0006865//amino acid transport;GO:0006820//anion transport;GO:0051234//establishment of localization;GO:0046942//carboxylic acid…
3647150	3647150	XM_706170.2	Known_gene	1	92659	94050	NC_032094.1	+	1392	1392	27.46	16.02	18.82	78.69	69.32	65.63	20.766	71.213	-1.76118	1.39414e-11	1.3262e-12	-1.51885	9.33582e-108	1.50051e-108	-2.1134	3.23502e-150	4.88896e-151	-1.80209	1.03572e-114	1.80846e-115	K13535//cardiolipin-specific phospholipase [EC:3.1.1.-]+ko00564//Glycerophospholipid metabolism	XP_711262.2|3.6e-276|carboxylic ester hydrolase [Candida albicans SC5314]	GO:0048878//chemical homeostasis;GO:0006644//phospholipid metabolic process;GO:0009987//cellular process;GO:0044237//cellular metabolic process;GO:0046471//phosphatidylglycerol metabolic process;GO:0006793//phosphorus metabolic process;GO:0006650//glycerophospholipid metabolic process;GO:0032048//cardiolipin metabolic process;GO:0019637//organophosphate metabolic process;GO:0071704//organic subst…
3646418	3646418	XM_706872.2	Known_gene	1	834229	836838	NC_032089.1	-	2610	2610	7.89	4.25	7.2	15.97	19.13	15.94	6.446	17.013	-1.39124	2.23864e-07	3.5927e-08	-1.01727	4.74457e-24	1.81359e-24	-2.1703	4.40991e-85	9.67312e-86	-1.14658	7.72011e-29	2.82462e-29	K06687//nucleolar protein involved in exit from mitosis+ko04111//Cell cycle - yeast;K09291//nucleoprotein TPR+ko03013//RNA transport	XP_711965.2|0.0e+00|hypothetical protein CAALFM_C103960CA [Candida albicans SC5314]	NA
3639339	LEU4	XM_713955.2	Known_gene	1	29804	31543	NC_032089.1	+	1740	1740	49.88	29.58	20.73	4.32	46.11	39.8	33.396	30.076	0.143465	0.891809	0.845536	3.52936	3.47668e-240	2.99374e-241	-0.640458	1.01576e-20	4.4629e-21	-0.941048	9.84364e-34	3.3244e-34	K01649//2-isopropylmalate synthase [EC:2.3.3.13]+ko01100//Metabolic pathways+ko01230//Biosynthesis of amino acids+ko00290//Valine, leucine and isoleucine biosynthesis+ko01110//Biosynthesis of secondary metabolites+ko01210//2-Oxocarboxylic acid metabolism+ko00620//Pyruvate metabolism	XP_719048.1|0.0e+00|2-isopropylmalate synthase [Candida albicans SC5314]	GO:0044281//small molecule metabolic process;GO:0006520//cellular amino acid metabolic process;GO:0019752//carboxylic acid metabolic process;GO:0009058//biosynthetic process;GO:0042221//response to chemical;GO:1901564//organonitrogen compound metabolic process;GO:0070887//cellular response to chemical stimulus;GO:0035690//cellular response to drug;GO:0042493//response to drug;GO:1901566//organoni…
3644072	SPO72	XM_709196.2	Known_gene	1	1225302	1230872	NC_032090.1	+	5571	5571	37.4	24.63	22.05	36.1	33.13	34.8	28.026	34.676	-0.307166	0.299526	0.210895	0.0510394	0.200318	0.177096	-0.427722	5.44191e-24	2.2512e-24	-0.658309	7.30129e-53	1.95974e-53	K17906//autophagy-related protein 2+ko04136//Autophagy - other+ko04138//Autophagy - yeast	XP_714289.2|0.0e+00|Spo72p [Candida albicans SC5314]	GO:0042886//amide transport;GO:1905037//autophagosome organization;GO:0016043//cellular component organization;GO:0070925//organelle assembly;GO:0044085//cellular component biogenesis;GO:0044248//cellular catabolic process;GO:0007005//mitochondrion organization;GO:0044804//autophagy of nucleus;GO:0044237//cellular metabolic process;GO:0022607//cellular component assembly;GO:0030242//autophagy of …
3642908	3642908	XM_710319.2	Known_gene	1	1557803	1562149	NC_032092.1	+	4347	4347	90.1	124.03	85.38	74.35	72.65	80.6	99.836	75.866	0.390153	0.122914	0.0725056	0.277194	3.52918e-22	1.40662e-22	0.771654	2.6668e-190	3.38076e-191	0.0831183	0.00457527	0.00352788	K03018//DNA-directed RNA polymerase III subunit RPC1 [EC:2.7.7.6]+ko03020//RNA polymerase	XP_715412.1|0.0e+00|DNA-directed RNA polymerase III core subunit [Candida albicans SC5314]	GO:0006351//transcription, DNA-templated;GO:0046483//heterocycle metabolic process;GO:0090304//nucleic acid metabolic process;GO:0006807//nitrogen compound metabolic process;GO:0044238//primary metabolic process;GO:0097659//nucleic acid-templated transcription;GO:0043170//macromolecule metabolic process;GO:0008152//metabolic process;GO:0034641//cellular nitrogen compound metabolic process;GO:0006…
3637037	3637037	XM_716309.1	Known_gene	1	344244	345575	NC_032095.1	-	1332	1332	13.93	14.02	30.63	17.62	24.58	23.08	19.526	21.76	-0.179945	0.649755	0.5565	-0.339019	0.00631166	0.004862	-0.809999	5.74836e-13	3.04438e-13	0.408302	2.06245e-05	1.39341e-05	NA	XP_721402.1|3.9e-256|hypothetical protein CAALFM_C701590CA [Candida albicans SC5314]	NA
3647912	MPP10	XM_705388.2	Known_gene	1	9360	11063	NC_032090.1	-	1704	1704	258.41	348.07	301.73	298.61	282.9	258.45	302.736	279.986	0.0993398	0.699259	0.613139	-0.208601	9.69005e-17	4.34632e-17	0.299085	2.32935e-36	8.02742e-37	0.223373	3.70505e-18	1.66795e-18	K14559//U3 small nucleolar RNA-associated protein MPP10+ko03008//Ribosome biogenesis in eukaryotes	KGR15876.1|0.0e+00|U3 small nucleolar RNA-associated protein MPP10 [Candida albicans P78048]	NA
3638406	SLD1	XM_714865.2	Known_gene	1	578561	580315	NC_032091.1	-	1755	1755	139.13	106.24	115.43	52.1	57.42	87.49	120.266	65.67	0.857282	0.000705126	0.000217296	1.41708	3.21013e-220	3.0369e-221	0.887702	1.73984e-80	3.92952e-81	0.399828	1.22364e-21	5.07642e-22	K13076//sphingolipid 8-(E)-desaturase [EC:1.14.19.18]	XP_719958.2|0.0e+00|Sld1p [Candida albicans SC5314]	GO:0043603//cellular amide metabolic process;GO:0044237//cellular metabolic process;GO:0016043//cellular component organization;GO:0046467//membrane lipid biosynthetic process;GO:0008152//metabolic process;GO:0044249//cellular biosynthetic process;GO:0071840//cellular component organization or biogenesis;GO:0044419//interspecies interaction between organisms;GO:0006629//lipid metabolic process;GO…
3637902	3637902	XM_715377.2	Known_gene	1	580679	582313	NC_032092.1	+	1635	1635	137.28	159.25	190.99	149.58	164.17	160.81	162.506	158.186	0.0224641	0.9258	0.892389	-0.123796	0.000568058	0.000409108	-0.0438971	0.212524	0.189942	0.24814	8.20229e-14	4.07108e-14	K09496//T-complex protein 1 subunit delta	XP_720470.1|1.4e-300|chaperonin-containing T-complex subunit [Candida albicans SC5314]	GO:0009987//cellular process;GO:0006457//protein folding;GO:0032991//protein-containing complex;GO:0005737//cytoplasm;GO:0005622//intracellular;GO:0101031//chaperone complex;GO:0005832//chaperonin-containing T-complex;GO:0005829//cytosol;GO:0110165//cellular anatomical entity;GO:0032553//ribonucleotide binding;GO:0035639//purine ribonucleoside triphosphate binding;GO:0032559//adenyl ribonucleotid…
3639545	3639545	XM_713744.1	Known_gene	1	1417195	1417896	NC_032089.1	-	702	702	5.77	12.91	7.53	1.24	0.47	0.34	8.736	0.683	3.32066	2.05779e-09	2.49823e-10	2.21823	3.97177e-07	2.41918e-07	4.77968	4.74413e-28	1.82801e-28	4.46904	3.5049e-16	1.64909e-16	NA	XP_718837.1|4.1e-127|hypothetical protein CAALFM_C106620CA [Candida albicans SC5314]	NA
3644092	3644092	XM_709158.1	Known_gene	1	1884891	1885955	NC_032090.1	+	1065	1065	18.23	19.68	25.5	13.16	11.47	9.91	21.136	11.513	0.837272	0.000999939	0.000318457	0.470155	0.00101817	0.000744128	0.778865	4.57844e-08	2.841e-08	1.36354	5.67944e-23	2.29562e-23	NA	XP_714251.1|6.0e-199|hypothetical protein CAALFM_C209180WA [Candida albicans SC5314]	GO:0006139//nucleobase-containing compound metabolic process;GO:0019693//ribose phosphate metabolic process;GO:0034655//nucleobase-containing compound catabolic process;GO:0009987//cellular process;GO:0044270//cellular nitrogen compound catabolic process;GO:0016070//RNA metabolic process;GO:1901575//organic substance catabolic process;GO:0009057//macromolecule catabolic process;GO:0090304//nuclei…
3645459	3645459	XM_707848.1	Known_gene	1	916040	917584	NC_032090.1	-	1545	1545	49.68	57.71	63.98	45.7	45.68	45.34	57.123	45.573	0.307545	0.106999	0.0613202	0.120471	0.0780083	0.066107	0.337259	6.98458e-08	4.36434e-08	0.496837	5.45958e-16	2.58516e-16	K01930//folylpolyglutamate synthase [EC:6.3.2.17]+ko01100//Metabolic pathways+ko00790//Folate biosynthesis	XP_712941.1|3.0e-300|tetrahydrofolate synthase [Candida albicans SC5314]	GO:0016053//organic acid biosynthetic process;GO:1901564//organonitrogen compound metabolic process;GO:0006725//cellular aromatic compound metabolic process;GO:0044271//cellular nitrogen compound biosynthetic process;GO:1901576//organic substance biosynthetic process;GO:0006730//one-carbon metabolic process;GO:0043603//cellular amide metabolic process;GO:1901360//organic cyclic compound metabolic…
3636226	HYR1	XM_717090.2	Known_gene	1	2944587	2947346	NC_032089.1	+	2760	2760	12.63	12.04	14.25	11.66	11.95	10.69	12.973	11.433	0.164917	0.432897	0.334194	0.115287	0.247649	0.222034	0.0108248	0.910814	0.902458	0.4147	1.12416e-05	7.49188e-06	K22493//agglutinin-like protein	XP_722183.2|0.0e+00|Hyr1p [Candida albicans SC5314]	GO:0009605//response to external stimulus;GO:0030682//mitigation of host defenses by symbiont;GO:0044406//adhesion of symbiont to host;GO:0052173//response to defenses of other organism;GO:0022610//biological adhesion;GO:0009607//response to biotic stimulus;GO:0044407//single-species biofilm formation in or on host organism;GO:0044403//symbiotic process;GO:0051701//interaction with host;GO:005170…
3643142	3643142	XM_710149.1	Known_gene	1	856037	856963	NC_032095.1	-	927	927	74.11	56.37	98.55	52.79	54.06	57.83	76.343	54.893	0.444478	0.0713317	0.0380325	0.489404	1.48144e-10	7.94508e-11	0.0603661	0.476414	0.44709	0.769038	6.52869e-29	2.38544e-29	NA	XP_715242.1|3.4e-174|hypothetical protein CAALFM_C703880CA [Candida albicans SC5314]	GO:0006796//phosphate-containing compound metabolic process;GO:0016310//phosphorylation;GO:0032502//developmental process;GO:0044114//development of symbiont in host;GO:0044115//development of symbiont involved in interaction with host;GO:0042775//mitochondrial ATP synthesis coupled electron transport;GO:0009987//cellular process;GO:0008152//metabolic process;GO:0055114//oxidation-reduction proce…
3646665	LHP1	XM_706645.2	Known_gene	1	1623838	1624812	NC_032089.1	-	975	975	240.92	264.39	307.8	280.11	273.07	226.85	271.036	260.01	0.0374949	0.885314	0.838199	-0.217439	6.95548e-10	3.81022e-10	-0.0466032	0.200271	0.178289	0.440255	1.77819e-34	5.94904e-35	K11090//lupus La protein	XP_711737.2|1.6e-182|Lhp1p [Candida albicans SC5314]	GO:0044237//cellular metabolic process;GO:0006396//RNA processing;GO:0034641//cellular nitrogen compound metabolic process;GO:0010467//gene expression;GO:0090304//nucleic acid metabolic process;GO:0016070//RNA metabolic process;GO:0006807//nitrogen compound metabolic process;GO:0006139//nucleobase-containing compound metabolic process;GO:0008152//metabolic process;GO:0071704//organic substance me…
3635284	EGD2	XM_717981.1	Known_gene	1	865042	865578	NC_032091.1	-	537	537	230.5	248.96	302.64	228.04	270.96	232.29	260.7	243.763	0.0743976	0.742141	0.660806	0.0154798	0.935244	0.925586	-0.122166	0.0205199	0.0166932	0.381676	7.01734e-13	3.57882e-13	K03626//nascent polypeptide-associated complex subunit alpha	XP_723074.1|7.2e-92|Egd2p [Candida albicans SC5314]	GO:0015833//peptide transport;GO:0051179//localization;GO:0015031//protein transport;GO:0071702//organic substance transport;GO:0008104//protein localization;GO:0033036//macromolecule localization;GO:0045184//establishment of protein localization;GO:0042886//amide transport;GO:0006810//transport;GO:0071705//nitrogen compound transport;GO:0051234//establishment of localization;GO:0032991//protein-…
3647153	FET3	XM_706173.2	Known_gene	1	80175	82049	NC_032094.1	-	1875	1875	7.67	8.69	8.22	7.78	7.6	7.54	8.193	7.64	0.0889058	0.736461	0.65489	-0.0205436	0.888421	0.87466	0.193357	0.18538	0.164198	0.124574	0.422129	0.390058	K19791//iron transport multicopper oxidase	XP_711265.2|0.0e+00|ferroxidase [Candida albicans SC5314]	GO:0008152//metabolic process;GO:0065007//biological regulation;GO:0006631//fatty acid metabolic process;GO:0071496//cellular response to external stimulus;GO:0098660//inorganic ion transmembrane transport;GO:0031668//cellular response to extracellular stimulus;GO:0051649//establishment of localization in cell;GO:0051179//localization;GO:0048878//chemical homeostasis;GO:0031669//cellular response…
3637982	3637982	XM_715298.1	Known_gene	1	31779	33545	NC_032095.1	+	1767	1767	10.18	8.87	12	37.33	47.2	40.1	10.35	41.543	-2.00047	3.55121e-25	1.03944e-26	-1.8746	1.80388e-89	3.27486e-90	-2.41178	2.52962e-156	3.67944e-157	-1.74057	6.95196e-87	1.41657e-87	K15015//solute carrier family 32 (vesicular inhibitory amino acid transporter)	XP_720391.1|0.0e+00|hypothetical protein CAALFM_C700230WA [Candida albicans SC5314]	GO:0006820//anion transport;GO:0071705//nitrogen compound transport;GO:0015849//organic acid transport;GO:0051234//establishment of localization;GO:0006865//amino acid transport;GO:0055085//transmembrane transport;GO:0071702//organic substance transport;GO:0046942//carboxylic acid transport;GO:0034220//ion transmembrane transport;GO:0006810//transport;GO:0003333//amino acid transmembrane transpor…
3645330	3645330	XM_707936.2	Known_gene	1	2541281	2541658	NC_032089.1	+	378	378	69.35	82.59	65.49	87.7	119.22	137.76	72.476	114.893	-0.663119	0.010251	0.00428075	-0.338681	0.00422741	0.00321844	-0.529587	1.03629e-06	6.75358e-07	-1.07281	2.62354e-23	1.05431e-23	K10253//DOPA 4,5-dioxygenase [EC:1.14.99.-]	XP_713029.1|9.3e-70|hypothetical protein CAALFM_C111580WA [Candida albicans SC5314]	GO:0003824//catalytic activity;GO:0016491//oxidoreductase activity;GO:0051213//dioxygenase activity;
3637738	3637738	XM_715508.2	Known_gene	1	613567	614718	NC_032093.1	-	1152	1152	72.57	71.12	75.03	45.36	60.2	64.31	72.906	56.623	0.354354	0.0809309	0.0444157	0.677953	2.26149e-22	8.97966e-23	0.240492	0.000250536	0.000181581	0.222424	0.000682492	0.000499986	K03130//transcription initiation factor TFIID subunit 5+ko03022//Basal transcription factors;K14556//U3 small nucleolar RNA-associated protein 12+ko03008//Ribosome biogenesis in eukaryotes;K14299//nucleoporin SEH1+ko03013//RNA transport	XP_720601.2|2.2e-223|iron-sulfur cluster assembly protein [Candida albicans SC5314]	GO:0031163//metallo-sulfur cluster assembly;GO:0009987//cellular process;GO:0016226//iron-sulfur cluster assembly;GO:0008152//metabolic process;GO:0071840//cellular component organization or biogenesis;GO:0006790//sulfur compound metabolic process;GO:0044237//cellular metabolic process;GO:0022607//cellular component assembly;GO:0044085//cellular component biogenesis;GO:0016043//cellular component…
3636963	NBP2	XM_716331.1	Known_gene	1	290111	291139	NC_032095.1	-	1029	1029	29.48	23.49	17.66	41.48	47.51	41.46	23.543	43.483	-0.873506	0.00129671	0.000424186	-0.492679	1.95909e-07	1.17337e-07	-1.01618	7.10503e-26	2.85268e-26	-1.23123	1.57417e-30	5.60744e-31	K12488//Arf-GAP with SH3 domain, ANK repeat and PH domain-containing protein+ko04144//Endocytosis;K19849//signaling mucin MSB2+ko04011//MAPK signaling pathway - yeast	XP_721424.1|4.3e-202|Nbp2p [Candida albicans SC5314]	GO:0030447//filamentous growth;GO:0007033//vacuole organization;GO:0009987//cellular process;GO:0016043//cellular component organization;GO:0071840//cellular component organization or biogenesis;GO:0030448//hyphal growth;GO:0040007//growth;GO:0006996//organelle organization;
3644545	NEP1	XM_708705.2	Known_gene	1	2495591	2496394	NC_032089.1	+	804	804	98.95	127.04	142.37	119.96	110.12	115.06	122.786	115.046	0.0727337	0.776362	0.701884	-0.277782	5.96401e-06	3.83926e-06	0.206206	0.00063839	0.000473548	0.307259	2.02706e-07	1.24758e-07	K14568//rRNA small subunit pseudouridine methyltransferase Nep1 [EC:2.1.1.260]+ko03008//Ribosome biogenesis in eukaryotes	RLP62404.1|9.6e-149|CAL0001059 ribosomal RNA small subunit methyltransferase NEP1 [Candida albicans Ca529L]	GO:0016072//rRNA metabolic process;GO:0044085//cellular component biogenesis;GO:0042254//ribosome biogenesis;GO:0006725//cellular aromatic compound metabolic process;GO:0043170//macromolecule metabolic process;GO:0016070//RNA metabolic process;GO:0006396//RNA processing;GO:0031167//rRNA methylation;GO:0006807//nitrogen compound metabolic process;GO:0071840//cellular component organization or biog…
3641553	3641553	XM_711698.1	Known_gene	1	69038	71404	NC_032093.1	+	2367	2367	26.78	21.8	25.63	20.15	15.44	16.33	24.736	17.306	0.490063	0.0330077	0.0159192	0.410376	3.53982e-08	2.0588e-08	0.497655	2.03386e-09	1.20166e-09	0.650309	1.5742e-16	7.35432e-17	K11397//chromatin modification-related protein VID21	XP_716791.1|0.0e+00|hypothetical protein CAALFM_C500380WA [Candida albicans SC5314]	GO:1901363//heterocyclic compound binding;GO:0003677//DNA binding;GO:0005488//binding;GO:0097159//organic cyclic compound binding;GO:0003676//nucleic acid binding;
3647593	3647593	XM_705710.1	Known_gene	1	1181749	1185222	NC_032096.1	-	3474	3474	134.74	128.39	122.87	91.8	80	83.32	128.666	85.04	0.581076	0.00171676	0.000579143	0.553612	6.23638e-91	1.11765e-91	0.682461	1.77842e-126	3.06144e-127	0.560398	1.21483e-84	2.5179e-85	K03021//DNA-directed RNA polymerase III subunit RPC2 [EC:2.7.7.6]+ko03020//RNA polymerase	KGQ82551.1|0.0e+00|DNA-directed RNA polymerase III subunit RPC2 [Candida albicans GC75]	GO:0034654//nucleobase-containing compound biosynthetic process;GO:0034641//cellular nitrogen compound metabolic process;GO:0071704//organic substance metabolic process;GO:0044249//cellular biosynthetic process;GO:0044238//primary metabolic process;GO:0046483//heterocycle metabolic process;GO:0009987//cellular process;GO:1901576//organic substance biosynthetic process;GO:0018130//heterocycle bios…
3641252	3641252	XM_712056.1	Known_gene	1	2197235	2198446	NC_032090.1	+	1212	1212	94.76	91.16	99.23	54.86	57.94	55.17	95.05	55.99	0.744777	1.22378e-06	2.24893e-07	0.788524	2.94066e-39	8.89936e-40	0.653841	5.92189e-28	2.28578e-28	0.846892	4.37198e-46	1.25871e-46	K14649//transcription initiation factor TFIID subunit 8+ko03022//Basal transcription factors	XP_717149.1|3.3e-225|hypothetical protein CAALFM_C210680WA [Candida albicans SC5314]	GO:0030880//RNA polymerase complex;GO:1902494//catalytic complex;GO:0061695//transferase complex, transferring phosphorus-containing groups;GO:0043233//organelle lumen;GO:0005654//nucleoplasm;GO:1990234//transferase complex;GO:0032991//protein-containing complex;GO:0055029//nuclear DNA-directed RNA polymerase complex;GO:0043231//intracellular membrane-bounded organelle;GO:0005634//nucleus;GO:0000…
3645979	3645979	XM_707343.1	Known_gene	1	1028580	1031093	NC_032094.1	+	2514	2514	106.74	101.95	79.95	132.38	165.53	168.91	96.213	155.606	-0.684186	0.00219033	0.000755124	-0.310584	3.5645e-23	1.39457e-23	-0.699231	2.18423e-121	3.8766e-122	-1.07908	3.12546e-255	3.02548e-256	K13095//splicing factor 1	XP_712436.1|0.0e+00|hypothetical protein CAALFM_C604650WA [Candida albicans SC5314]	GO:0043170//macromolecule metabolic process;GO:0006807//nitrogen compound metabolic process;GO:0044238//primary metabolic process;GO:0006508//proteolysis;GO:0071704//organic substance metabolic process;GO:0019538//protein metabolic process;GO:0008152//metabolic process;GO:1901564//organonitrogen compound metabolic process;GO:0031224//intrinsic component of membrane;GO:0098805//whole membrane;GO:0…
3640987	3640987	XM_712306.2	Known_gene	1	984184	986580	NC_032096.1	-	2397	2397	25.46	23.51	32	25.58	31.92	30.61	26.99	29.37	-0.135674	0.535073	0.436387	-0.00678384	0.90901	0.897504	-0.441186	5.66501e-11	3.18072e-11	0.0640689	0.350419	0.319826	K03130//transcription initiation factor TFIID subunit 5+ko03022//Basal transcription factors	XP_717399.2|0.0e+00|chromatin modification protein [Candida albicans SC5314]	NA
3635754	ECM3	XM_717512.2	Known_gene	1	476572	478212	NC_032090.1	+	1641	1641	70.83	57.34	59.9	38.28	40.54	45.07	62.69	41.296	0.588692	0.00186753	0.000634829	0.88777	4.83065e-50	1.28973e-50	0.500196	7.97932e-16	3.92644e-16	0.410389	1.30828e-11	6.91414e-12	K07088//uncharacterized protein	XP_722605.2|1.2e-307|putative ATPase [Candida albicans SC5314]	GO:0051179//localization;GO:0006810//transport;GO:0009987//cellular process;GO:0055085//transmembrane transport;GO:0051234//establishment of localization;GO:0016020//membrane;GO:0031224//intrinsic component of membrane;GO:0110165//cellular anatomical entity;GO:0016021//integral component of membrane;
3640752	3640752	XM_712557.2	Known_gene	1	1831872	1832345	NC_032089.1	-	474	474	60.49	53.59	44.32	42.88	51.64	45.09	52.8	46.536	0.167688	0.554041	0.454253	0.496392	0.000175533	0.00012244	0.0534748	0.693089	0.670892	-0.0248496	0.786783	0.765416	K17918//sorting nexin-3/12+ko04144//Endocytosis	XP_717650.2|1.4e-83|hypothetical protein CAALFM_C108340CA [Candida albicans SC5314]	GO:0042147//retrograde transport, endosome to Golgi;GO:0016197//endosomal transport;GO:0009987//cellular process;GO:0050794//regulation of cellular process;GO:0090087//regulation of peptide transport;GO:0045184//establishment of protein localization;GO:0051234//establishment of localization;GO:0051649//establishment of localization in cell;GO:0050789//regulation of biological process;GO:0032879//…
3640080	3640080	XM_713122.2	Known_gene	1	363823	366783	NC_032096.1	-	2961	2961	19.73	20.03	23.65	16.17	10.28	10.71	21.136	12.386	0.732192	0.00683008	0.00269886	0.287071	0.000158122	0.000110032	0.962322	3.51512e-31	1.29757e-31	1.14288	1.07882e-47	3.04844e-48	NA	XP_718215.2|0.0e+00|hypothetical protein CAALFM_CR01600CA [Candida albicans SC5314]	NA
3643132	3643132	XM_710119.1	Known_gene	1	891570	891977	NC_032095.1	+	408	408	7.98	6.05	7.92	17.7	19.84	26.37	7.316	21.303	-1.51453	7.78732e-06	1.62274e-06	-1.14929	0.000103065	7.07754e-05	-1.7134	3.02268e-08	1.85949e-08	-1.73533	6.42301e-11	3.47476e-11	NA	XP_715212.1|2.0e-73|hypothetical protein CAALFM_C704120WA [Candida albicans SC5314]	NA
3636429	PEX4	XM_716856.1	Known_gene	1	1172085	1172609	NC_032093.1	+	525	525	327.74	212.13	181.57	125.2	191.64	209.46	240.48	175.433	0.443119	0.187792	0.11924	1.38832	1.7621e-120	2.62378e-121	0.14655	0.0168611	0.0136182	-0.206149	0.000359601	0.000258886	K10689//peroxin-4 [EC:2.3.2.23]	XP_721949.1|5.0e-98|E2 ubiquitin-protein ligase peroxin 4 [Candida albicans SC5314]	GO:0072662//protein localization to peroxisome;GO:0044743//protein transmembrane import into intracellular organelle;GO:0015031//protein transport;GO:0016558//protein import into peroxisome matrix;GO:0051234//establishment of localization;GO:0006807//nitrogen compound metabolic process;GO:0006625//protein targeting to peroxisome;GO:0051649//establishment of localization in cell;GO:0006810//transp…
3644994	3644994	XM_019475354.1	Known_gene	1	43184	44714	NC_032092.1	-	1531	1305	10.94	9.5	12.74	4.77	2.98	3.03	11.06	3.593	1.555	2.94009e-07	4.82599e-08	1.19755	6.56417e-11	3.47232e-11	1.67262	3.53981e-15	1.76725e-15	2.07198	5.08688e-26	1.94508e-26	NA	XP_019330899.1|2.3e-264|hypothetical protein CAALFM_C400290CA [Candida albicans SC5314]	GO:0008152//metabolic process;GO:0009987//cellular process;GO:0044237//cellular metabolic process;GO:0051536//iron-sulfur cluster binding;GO:0043169//cation binding;GO:0005506//iron ion binding;GO:0016491//oxidoreductase activity;GO:0051540//metal cluster binding;GO:0005488//binding;GO:0051537//2 iron, 2 sulfur cluster binding;GO:0003824//catalytic activity;GO:0046872//metal ion binding;GO:004691…
30515263	30515263	XM_019475377.1	Known_gene	1	844510	844815	NC_032092.1	-	306	306	NA	NA	NA	NA	NA	NA	NA	NA	NA	NA	NA	NA	NA	NA	NA	NA	NA	NA	NA	NA	NA	XP_019330922.1|5.6e-49|hypothetical protein CAALFM_C403950CA [Candida albicans SC5314]	GO:0110165//cellular anatomical entity;GO:0031224//intrinsic component of membrane;GO:0016020//membrane;GO:0016021//integral component of membrane;
30515277	30515277	XM_019475390.1	Known_gene	1	1290067	1290333	NC_032092.1	+	267	267	59.4	36.28	38.31	40.59	70.03	55.79	44.663	55.47	-0.316603	0.408439	0.311244	0.549339	0.0107222	0.00840956	-0.948799	3.053e-06	2.02532e-06	-0.542286	0.00810834	0.00636698	K22069//LYR motif-containing protein 4	XP_019330935.1|1.3e-41|hypothetical protein CAALFM_C405820WA [Candida albicans SC5314]	GO:0071840//cellular component organization or biogenesis;GO:0044237//cellular metabolic process;GO:0008152//metabolic process;GO:0006790//sulfur compound metabolic process;GO:0016226//iron-sulfur cluster assembly;GO:0031163//metallo-sulfur cluster assembly;GO:0022607//cellular component assembly;GO:0044085//cellular component biogenesis;GO:0009987//cellular process;GO:0016043//cellular component…
3644107	3644107	XM_709173.1	Known_gene	1	1903774	1904226	NC_032090.1	+	453	453	0.64	0.83	0.85	0	0	0	0.773	0	2.33526	0.0241781	0.0112426	6	0.12873	0.111149	6.37504	0.0735032	0.0625666	6.40939	0.0661049	0.0556638	NA	XP_714266.1|1.5e-77|hypothetical protein CAALFM_C209340WA [Candida albicans SC5314]	NA
3636902	NGG1	XM_716428.1	Known_gene	1	686628	688511	NC_032089.1	+	1884	1884	40.87	29.96	28.64	32.05	39.98	38.34	33.156	36.79	-0.152184	0.577484	0.478275	0.350718	2.11505e-07	1.26853e-07	-0.416241	1.06038e-09	6.18892e-10	-0.420819	1.42038e-09	8.03668e-10	K11315//transcriptional adapter 3	XP_721521.1|0.0e+00|histone acetyltransferase [Candida albicans SC5314]	GO:0043170//macromolecule metabolic process;GO:2001141//regulation of RNA biosynthetic process;GO:0006996//organelle organization;GO:0043967//histone H4 acetylation;GO:1901564//organonitrogen compound metabolic process;GO:1903506//regulation of nucleic acid-templated transcription;GO:0043543//protein acylation;GO:0016043//cellular component organization;GO:0006357//regulation of transcription by …
3641157	SCS7	XM_712134.1	Known_gene	1	987763	988899	NC_032092.1	+	1137	1137	304.96	287.76	354.97	332.45	357.88	402.99	315.896	364.44	-0.219266	0.20364	0.131288	-0.124517	1.80311e-05	1.18686e-05	-0.31461	1.03851e-26	4.10034e-27	-0.183047	5.52119e-12	2.88846e-12	K19703//4-hydroxysphinganine ceramide fatty acyl 2-hydroxylase [EC:1.14.18.6]	XP_717227.1|1.2e-229|fatty acid alpha-hydroxylase [Candida albicans SC5314]	GO:0006631//fatty acid metabolic process;GO:0006807//nitrogen compound metabolic process;GO:0009058//biosynthetic process;GO:0006629//lipid metabolic process;GO:0006644//phospholipid metabolic process;GO:0006672//ceramide metabolic process;GO:0046467//membrane lipid biosynthetic process;GO:1901566//organonitrogen compound biosynthetic process;GO:0043436//oxoacid metabolic process;GO:0006793//phos…
3638312	3638312	XM_714953.1	Known_gene	1	752036	752503	NC_032091.1	+	468	468	16.98	17.26	13.01	18.38	16.47	18.24	15.75	17.696	-0.178736	0.612012	0.515014	-0.1143	0.592251	0.561672	0.0675919	0.779604	0.761918	-0.487485	0.0366042	0.0301518	K15542//polyadenylation factor subunit 2+ko03015//mRNA surveillance pathway;K00587//protein-S-isoprenylcysteine O-methyltransferase [EC:2.1.1.100]+ko00900//Terpenoid backbone biosynthesis+ko01130//Biosynthesis of antibiotics	XP_720046.1|4.1e-83|hypothetical protein CAALFM_C303530WA [Candida albicans SC5314]	GO:0016020//membrane;GO:0016021//integral component of membrane;GO:0110165//cellular anatomical entity;GO:0031224//intrinsic component of membrane;
30514966	30514966	XM_019475069.1	Known_gene	1	400591	401977	NC_032089.1	+	1387	1101	60.9	112.29	133.35	438.91	410.36	425.95	102.18	425.073	-2.03357	7.06685e-13	5.89982e-14	-2.84941	0	0	-1.86966	0	0	-1.67547	0	0	NA	XP_019330614.1|3.3e-208|hypothetical protein CAALFM_C101930WA [Candida albicans SC5314]	NA
3635593	3635593	XM_717589.2	Known_gene	1	359054	360847	NC_032092.1	-	1794	1794	27.7	25.84	26.76	21.73	19.43	25.51	26.766	22.223	0.256528	0.227967	0.151233	0.350198	3.4728e-05	2.3206e-05	0.41132	2.49531e-06	1.64911e-06	0.0690152	0.439184	0.406842	K01293//Gly-Xaa carboxypeptidase [EC:3.4.17.4]	XP_722682.2|0.0e+00|hypothetical protein CAALFM_C401830CA [Candida albicans SC5314]	GO:0071704//organic substance metabolic process;GO:0043170//macromolecule metabolic process;GO:0044237//cellular metabolic process;GO:0006508//proteolysis;GO:0044265//cellular macromolecule catabolic process;GO:0044257//cellular protein catabolic process;GO:0044248//cellular catabolic process;GO:0006807//nitrogen compound metabolic process;GO:1901575//organic substance catabolic process;GO:004423…
3641023	3641023	XM_712261.2	Known_gene	1	915381	917402	NC_032096.1	-	2022	2022	47.4	53.83	73.89	69.31	85.01	89.07	58.373	81.13	-0.485255	0.0309749	0.0148358	-0.548176	3.21892e-27	1.16233e-27	-0.659222	1.78555e-45	5.51302e-46	-0.26956	2.50526e-10	1.38495e-10	K09540//translocation protein SEC63+ko04141//Protein processing in endoplasmic reticulum+ko03060//Protein export	XP_717354.2|0.0e+00|protein-transporting protein [Candida albicans SC5314]	GO:0055085//transmembrane transport;GO:0015031//protein transport;GO:0006614//SRP-dependent cotranslational protein targeting to membrane;GO:0015833//peptide transport;GO:0090150//establishment of protein localization to membrane;GO:0034613//cellular protein localization;GO:0045047//protein targeting to ER;GO:0051649//establishment of localization in cell;GO:0009987//cellular process;GO:0033036//…
3647302	3647302	XM_706008.2	Known_gene	1	1034922	1035491	NC_032096.1	-	570	570	23.65	32.47	27.55	61.23	59.47	54.71	27.89	58.47	-1.06905	5.11526e-06	1.03445e-06	-1.3724	2.94305e-26	1.0833e-26	-0.873055	6.18447e-13	3.27844e-13	-0.989752	9.42623e-15	4.57962e-15	NA	KGR01950.1|1.4e-101|hypothetical protein MG5_05810 [Candida albicans P57072]	GO:0110165//cellular anatomical entity;GO:0016021//integral component of membrane;GO:0031224//intrinsic component of membrane;GO:0016020//membrane;
3647903	3647903	XM_705398.2	Known_gene	1	18679	20661	NC_032094.1	-	1983	1983	139.53	114.85	99.43	108.36	118.03	106.86	117.936	111.083	0.0792746	0.77039	0.694543	0.364743	5.21924e-25	1.96634e-25	-0.0394027	0.295218	0.269168	-0.103969	0.00645611	0.00503086	K11841//ubiquitin carboxyl-terminal hydrolase 10 [EC:3.4.19.12]+ko04139//Mitophagy - yeast	XP_710490.2|0.0e+00|mRNA-binding ubiquitin-specific protease [Candida albicans SC5314]	GO:0044238//primary metabolic process;GO:0009056//catabolic process;GO:0006508//proteolysis;GO:0006807//nitrogen compound metabolic process;GO:0030163//protein catabolic process;GO:0006511//ubiquitin-dependent protein catabolic process;GO:0043170//macromolecule metabolic process;GO:0019941//modification-dependent protein catabolic process;GO:1901565//organonitrogen compound catabolic process;GO:0…
3644114	3644114	XM_709150.1	Known_gene	1	1862511	1862975	NC_032090.1	-	465	465	12.8	15.22	15.38	45.78	24.02	23.44	14.466	31.08	-1.09917	0.00371826	0.00135918	-1.83857	6.76607e-23	2.6618e-23	-0.658268	0.00213509	0.00163399	-0.607917	0.0038661	0.00296946	K20047//actin cytoskeleton-regulatory complex protein PAN1	XP_024674036.1|6.8e-06|hypothetical protein BDW47DRAFT_102106 [Aspergillus candidus]	NA
3646071	3646071	XM_707216.2	Known_gene	1	47121	49541	NC_032094.1	+	2421	2421	132.2	134.27	113.8	80.16	98.1	100.87	126.756	93.043	0.440195	0.0294323	0.0140186	0.721768	6.97037e-98	1.19694e-98	0.452812	4.00527e-44	1.25269e-44	0.174003	4.87815e-07	3.04864e-07	K14023//ERAD-associated E3 ubiquitin-protein ligase component HRD3+ko04141//Protein processing in endoplasmic reticulum	XP_712309.2|0.0e+00|ubiquitin ligase complex subunit [Candida albicans SC5314]	GO:0044237//cellular metabolic process;GO:0030163//protein catabolic process;GO:0051716//cellular response to stimulus;GO:0009987//cellular process;GO:0071704//organic substance metabolic process;GO:0006508//proteolysis;GO:0010243//response to organonitrogen compound;GO:1901575//organic substance catabolic process;GO:0030433//ubiquitin-dependent ERAD pathway;GO:0036503//ERAD pathway;GO:0044260//c…
3643121	3643121	XM_710108.1	Known_gene	1	907552	908649	NC_032095.1	-	1098	1098	243.08	221.45	243.88	303.63	389.49	452.05	236.136	381.723	-0.693154	0.000337521	9.77719e-05	-0.320883	3.07548e-23	1.20018e-23	-0.814605	3.23845e-150	4.88874e-151	-0.890311	2.60961e-203	3.03918e-204	K01738//cysteine synthase [EC:2.5.1.47]+ko00920//Sulfur metabolism+ko01100//Metabolic pathways+ko01230//Biosynthesis of amino acids+ko01130//Biosynthesis of antibiotics+ko01110//Biosynthesis of secondary metabolites+ko00270//Cysteine and methionine metabolism+ko01200//Carbon metabolism	XP_715201.1|2.8e-207|hypothetical protein CAALFM_C704210CA [Candida albicans SC5314]	GO:0000097//sulfur amino acid biosynthetic process;GO:0016053//organic acid biosynthetic process;GO:0009070//serine family amino acid biosynthetic process;GO:0044249//cellular biosynthetic process;GO:0044283//small molecule biosynthetic process;GO:0044237//cellular metabolic process;GO:0006807//nitrogen compound metabolic process;GO:0006534//cysteine metabolic process;GO:0019344//cysteine biosynt…
3643729	MTLA1	XM_019475414.1	Known_gene	1	393493	394455	NC_032093.1	-	963	633	18.88	17.48	25.29	56.22	49.01	48.23	20.55	51.153	-1.32445	1.02218e-08	1.36846e-09	-1.57422	2.43675e-33	7.99534e-34	-1.48737	6.26605e-27	2.46252e-27	-0.931364	1.52746e-13	7.63478e-14	K09358//mating-type protein A1+ko04113//Meiosis - yeast;K02646//regulatory protein PHO2+ko04111//Cell cycle - yeast	XP_019330959.1|2.6e-109|Mtla1p [Candida albicans SC5314]	GO:0010556//regulation of macromolecule biosynthetic process;GO:1903507//negative regulation of nucleic acid-templated transcription;GO:0010468//regulation of gene expression;GO:0051252//regulation of RNA metabolic process;GO:0031326//regulation of cellular biosynthetic process;GO:0010629//negative regulation of gene expression;GO:0031138//negative regulation of conjugation with cellular fusion;G…
3644770	HAT1	XM_708496.2	Known_gene	1	970917	972158	NC_032089.1	+	1242	1242	23.99	16.47	22.83	28.89	43.52	49.02	21.096	40.476	-0.931271	0.000420065	0.000124629	-0.268137	0.00671476	0.00517922	-1.40184	1.1824e-47	3.5403e-48	-1.10244	4.29397e-37	1.38077e-37	K11303//histone acetyltransferase 1 [EC:2.3.1.48]	XP_713589.1|7.7e-238|histone acetyltransferase catalytic subunit [Candida albicans SC5314]	GO:1902679//negative regulation of RNA biosynthetic process;GO:0010558//negative regulation of macromolecule biosynthetic process;GO:2001141//regulation of RNA biosynthetic process;GO:0031324//negative regulation of cellular metabolic process;GO:0060255//regulation of macromolecule metabolic process;GO:0051128//regulation of cellular component organization;GO:0097549//chromatin organization invol…
3639564	MEF2	XM_713705.2	Known_gene	1	1490452	1492731	NC_032089.1	+	2280	2280	27.89	27.19	46.64	15.79	20.57	20.94	33.906	19.1	0.793596	0.00229149	0.000794953	0.820737	2.72499e-25	1.02074e-25	0.402534	7.1695e-08	4.48348e-08	1.15531	8.07985e-72	1.8389e-72	K02355//elongation factor G	XP_718798.2|0.0e+00|Mef2p [Candida albicans SC5314]	GO:0071704//organic substance metabolic process;GO:0009059//macromolecule biosynthetic process;GO:0043604//amide biosynthetic process;GO:0043043//peptide biosynthetic process;GO:0022411//cellular component disassembly;GO:0006518//peptide metabolic process;GO:0008152//metabolic process;GO:0044260//cellular macromolecule metabolic process;GO:0044271//cellular nitrogen compound biosynthetic process;…
3634766	3634766	XM_718409.1	Known_gene	1	2094630	2095979	NC_032089.1	-	1350	1350	78.45	94.6	106.48	71.33	63.64	61.46	93.176	65.476	0.483844	0.021578	0.00993671	0.137264	0.0186767	0.0149563	0.571906	7.23433e-26	2.9058e-26	0.792863	1.01692e-49	2.81084e-50	K19787//carnosine N-methyltransferase [EC:2.1.1.22]+ko00340//Histidine metabolism	XP_723502.1|5.0e-259|hypothetical protein CAALFM_C109520CA [Candida albicans SC5314]	GO:0016021//integral component of membrane;GO:0016020//membrane;GO:0110165//cellular anatomical entity;GO:0031224//intrinsic component of membrane;GO:0003824//catalytic activity;GO:0008757//S-adenosylmethionine-dependent methyltransferase activity;GO:0008168//methyltransferase activity;GO:0016741//transferase activity, transferring one-carbon groups;GO:0016740//transferase activity;
3643793	3643793	XM_709467.2	Known_gene	1	1977647	1978303	NC_032090.1	+	657	657	253.41	227.76	248.07	196.82	238.53	263.14	243.08	232.83	0.0503311	0.819033	0.755695	0.364597	4.02974e-13	1.98064e-13	-0.0666563	0.178838	0.157986	-0.0850833	0.0437376	0.0362318	K14839//nucleolar protein 16	XP_714560.2|1.7e-119|hypothetical protein CAALFM_C209660WA [Candida albicans SC5314]	GO:0008152//metabolic process;GO:0006807//nitrogen compound metabolic process;GO:0046483//heterocycle metabolic process;GO:0016072//rRNA metabolic process;GO:0044238//primary metabolic process;GO:0044237//cellular metabolic process;GO:0034470//ncRNA processing;GO:0044085//cellular component biogenesis;GO:0009987//cellular process;GO:0006725//cellular aromatic compound metabolic process;GO:1901360…
3643103	MAM33	XM_710143.1	Known_gene	1	862087	862881	NC_032095.1	-	795	795	408.52	294.89	500.88	184.42	227.45	221.54	401.43	211.136	0.893093	7.19878e-05	1.78709e-05	1.14741	2.31913e-188	2.4605e-189	0.374627	2.12719e-20	9.42066e-21	1.1769	1.9835e-239	2.03902e-240	K15414//complement component 1 Q subcomponent-binding protein, mitochondrial	XP_715236.1|2.7e-143|Mam33p [Candida albicans SC5314]	GO:0031325//positive regulation of cellular metabolic process;GO:0032270//positive regulation of cellular protein metabolic process;GO:0051171//regulation of nitrogen compound metabolic process;GO:0010628//positive regulation of gene expression;GO:0010557//positive regulation of macromolecule biosynthetic process;GO:0009889//regulation of biosynthetic process;GO:0048518//positive regulation of bi…
3642060	WRS1	XM_711202.2	Known_gene	1	2696433	2697707	NC_032089.1	-	1275	1275	44.19	101.18	99.63	84.89	77.88	76.24	81.666	79.67	0.0163299	0.97344	0.956928	-0.941875	1.61071e-50	4.2709e-51	0.377599	7.8005e-13	4.14292e-13	0.386032	8.32078e-13	4.25466e-13	K01867//tryptophanyl-tRNA synthetase [EC:6.1.1.2]+ko00970//Aminoacyl-tRNA biosynthesis	XP_716295.1|1.8e-245|tryptophan--tRNA ligase [Candida albicans SC5314]	GO:0009058//biosynthetic process;GO:0043604//amide biosynthetic process;GO:0009987//cellular process;GO:0044260//cellular macromolecule metabolic process;GO:0043043//peptide biosynthetic process;GO:0009059//macromolecule biosynthetic process;GO:0006082//organic acid metabolic process;GO:0043039//tRNA aminoacylation;GO:0044237//cellular metabolic process;GO:0016070//RNA metabolic process;GO:001953…
3638867	DFG5	XM_714429.1	Known_gene	1	82824	84179	NC_032090.1	+	1356	1356	206.8	174.8	141.48	112.76	144.4	143.15	174.36	133.436	0.380028	0.132271	0.0789709	0.874981	1.75348e-113	2.719e-114	0.275634	4.36141e-13	2.30402e-13	-0.0169295	0.623797	0.594592	K08257//mannan endo-1,6-alpha-mannosidase [EC:3.2.1.101]	XP_719522.1|2.0e-271|putative mannan endo-1,6-alpha-mannosidase [Candida albicans SC5314]	GO:0070887//cellular response to chemical stimulus;GO:0071704//organic substance metabolic process;GO:0032505//reproduction of a single-celled organism;GO:0050896//response to stimulus;GO:0030447//filamentous growth;GO:1901575//organic substance catabolic process;GO:0031505//fungal-type cell wall organization;GO:0005975//carbohydrate metabolic process;GO:0016043//cellular component organization;G…
3635793	3635793	XM_717458.2,BGI_novel_T000040	Known_gene	2	360838	362368	NC_032090.1	-	1531	1509	49.22	47.8	54.68	148.76	163.25	146.98	50.566	152.996	-1.63084	2.41478e-26	6.74677e-28	-1.59567	2.21924e-239	1.91836e-240	-1.772	6.0117e-298	5.46518e-299	-1.42653	8.43511e-205	9.79552e-206	K19487//transcription factor SFP1	XP_722551.2|1.6e-204|hypothetical protein CAALFM_C201930CA [Candida albicans SC5314]	NA
3647390	HEM13	XM_705907.1	Known_gene	1	846209	847180	NC_032091.1	-	972	972	188.25	197.45	271.26	73.38	76.01	107.25	218.986	85.546	1.32223	3.66396e-09	4.6188e-10	1.35919	1.75123e-144	2.278e-145	1.37723	1.78803e-155	2.61866e-156	1.3387	3.46384e-202	4.05134e-203	K00228//coproporphyrinogen III oxidase [EC:1.3.3.3]+ko00860//Porphyrin and chlorophyll metabolism+ko01100//Metabolic pathways+ko01110//Biosynthesis of secondary metabolites	XP_710999.1|2.6e-193|coproporphyrinogen oxidase [Candida albicans SC5314]	GO:0046483//heterocycle metabolic process;GO:0006783//heme biosynthetic process;GO:0006725//cellular aromatic compound metabolic process;GO:0006779//porphyrin-containing compound biosynthetic process;GO:0006807//nitrogen compound metabolic process;GO:1901362//organic cyclic compound biosynthetic process;GO:0019438//aromatic compound biosynthetic process;GO:0006782//protoporphyrinogen IX biosynthe…
3648179	SPB1	XM_705132.2	Known_gene	1	913551	916088	NC_032094.1	-	2538	2538	287.7	277.88	272.77	261.53	198.1	228.58	279.45	229.403	0.267949	0.228054	0.151328	0.137589	5.5304e-11	2.91442e-11	0.488233	4.9341e-108	9.44846e-109	0.254986	1.12415e-31	3.9201e-32	K14857//AdoMet-dependent rRNA methyltransferase SPB1 [EC:2.1.1.-]	XP_710224.1|0.0e+00|27S pre-rRNA (guanosine2922-2'-O)-methyltransferase [Candida albicans SC5314]	GO:0000466//maturation of 5.8S rRNA from tricistronic rRNA transcript (SSU-rRNA, 5.8S rRNA, LSU-rRNA);GO:0010467//gene expression;GO:0043170//macromolecule metabolic process;GO:0043412//macromolecule modification;GO:0031167//rRNA methylation;GO:0034470//ncRNA processing;GO:0042254//ribosome biogenesis;GO:0006807//nitrogen compound metabolic process;GO:0016072//rRNA metabolic process;GO:0071840//c…
3636632	3636632	XM_716685.2	Known_gene	1	307532	307839	NC_032091.1	-	308	308	3.95	5.24	9.32	0.18	4.68	0	6.17	1.62	1.4025	0.152906	0.0932235	4.45578	0.00096962	0.000707028	0.163058	0.858334	0.845878	9.86419	5.54845e-08	3.33998e-08	K15075//DNA repair/transcription protein MET18/MMS19	XP_721778.2|2.0e-46|hypothetical protein CAALFM_C301440CA, partial [Candida albicans SC5314]	NA
3647479	3647479	XM_705832.2	Known_gene	1	1215977	1216873	NC_032090.1	-	897	897	13.14	16.59	20.54	4.12	4.75	6.51	16.756	5.126	1.65556	1.48723e-08	2.05783e-09	1.67325	1.00392e-13	4.84904e-14	1.80431	8.25572e-19	3.78152e-19	1.65771	2.00915e-20	8.55948e-21	K10847//DNA-repair protein complementing XP-A cells+ko03420//Nucleotide excision repair;K01068//acyl-coenzyme A thioesterase 1/2/4 [EC:3.1.2.2]+ko01100//Metabolic pathways+ko01110//Biosynthesis of secondary metabolites+ko00062//Fatty acid elongation+ko01040//Biosynthesis of unsaturated fatty acids;K11992//acyl-CoA thioesterase 8 [EC:3.1.2.27]+ko04146//Peroxisome+ko01100//Metabolic pathways	XP_710924.2|6.0e-168|hypothetical protein CAALFM_C205960CA [Candida albicans SC5314]	GO:0072521//purine-containing compound metabolic process;GO:0044281//small molecule metabolic process;GO:0033865//nucleoside bisphosphate metabolic process;GO:0016042//lipid catabolic process;GO:0016054//organic acid catabolic process;GO:0032787//monocarboxylic acid metabolic process;GO:0008152//metabolic process;GO:0043436//oxoacid metabolic process;GO:0006139//nucleobase-containing compound met…
3641155	3641155	XM_712132.2	Known_gene	1	996059	997609	NC_032092.1	-	1551	1551	13.07	11.39	14.09	23.9	23.47	20.39	12.85	22.586	-0.825396	6.0545e-05	1.48015e-05	-0.870751	1.85453e-16	8.38306e-17	-1.04305	1.99961e-21	8.69554e-22	-0.53319	8.40495e-07	5.31016e-07	K06125//4-hydroxybenzoate polyprenyltransferase [EC:2.5.1.39]+ko00130//Ubiquinone and other terpenoid-quinone biosynthesis+ko01100//Metabolic pathways+ko01110//Biosynthesis of secondary metabolites;K15334//multisite-specific tRNA:(cytosine-C5)-methyltransferase [EC:2.1.1.202];K04563//cyclin-dependent kinase [EC:2.7.11.22]+ko04011//MAPK signaling pathway - yeast+ko04113//Meiosis - yeast+ko04111//C…	XP_717225.2|8.8e-300|hypothetical protein CAALFM_C404620CA [Candida albicans SC5314]	GO:0005622//intracellular;GO:0043231//intracellular membrane-bounded organelle;GO:0005634//nucleus;GO:0043226//organelle;GO:0110165//cellular anatomical entity;GO:0043229//intracellular organelle;GO:0043227//membrane-bounded organelle;GO:0003676//nucleic acid binding;GO:0005488//binding;GO:1901363//heterocyclic compound binding;GO:0097159//organic cyclic compound binding;GO:0003677//DNA binding;
3640415	3640415	XM_712872.1	Known_gene	1	189237	189632	NC_032096.1	+	396	396	28.67	46.07	46.05	40.65	32.13	40.72	40.263	37.833	0.0620224	0.870721	0.818881	-0.503713	0.00419281	0.0031907	0.519907	0.00229777	0.00176309	0.177464	0.339213	0.308864	K12594//M-phase phosphoprotein 6, fungi type+ko03018//RNA degradation	XP_717965.1|7.0e-68|hypothetical protein CAALFM_CR00810WA [Candida albicans SC5314]	NA
3636664	3636664	XM_716666.2	Known_gene	1	353503	354663	NC_032091.1	+	1161	1161	323.37	246.57	347.07	403.75	515.86	521.28	305.67	480.296	-0.659884	0.000883817	0.000277947	-0.320276	3.57288e-32	1.19017e-32	-1.06498	0	0	-0.586832	7.55457e-122	1.26749e-122	K03953//NADH dehydrogenase (ubiquinone) 1 alpha subcomplex subunit 9+ko01100//Metabolic pathways+ko00190//Oxidative phosphorylation	XP_721759.2|1.6e-221|hypothetical protein CAALFM_C301610WA [Candida albicans SC5314]	GO:0042180//cellular ketone metabolic process;GO:0071704//organic substance metabolic process;GO:0042181//ketone biosynthetic process;GO:0006744//ubiquinone biosynthetic process;GO:0044249//cellular biosynthetic process;GO:1901006//ubiquinone-6 biosynthetic process;GO:0009058//biosynthetic process;GO:1901663//quinone biosynthetic process;GO:0009987//cellular process;GO:0008152//metabolic process;…
3646067	CPH2	XM_707212.2	Known_gene	1	32516	35077	NC_032094.1	+	2562	2562	152.54	151.76	149.56	178.53	178.28	212.42	151.286	189.743	-0.3317	0.0529929	0.027109	-0.226979	6.40987e-18	2.79284e-18	-0.232353	1.45825e-18	6.72572e-19	-0.506195	2.30212e-89	4.63722e-90	K09074//fungal twist-like factor	XP_712305.1|0.0e+00|Cph2p [Candida albicans SC5314]	GO:0048584//positive regulation of response to stimulus;GO:0070887//cellular response to chemical stimulus;GO:0060255//regulation of macromolecule metabolic process;GO:0031323//regulation of cellular metabolic process;GO:0036178//filamentous growth of a population of unicellular organisms in response to neutral pH;GO:0051171//regulation of nitrogen compound metabolic process;GO:0035690//cellular …
3647886	3647886	XM_705426.1	Known_gene	1	10151	11086	NC_032093.1	-	936	936	102.95	108.85	149.88	115.28	128.11	129.17	120.56	124.186	-0.0626937	0.797027	0.728419	-0.163198	0.00360245	0.00272764	-0.235042	1.80164e-05	1.23245e-05	0.214537	4.10767e-05	2.81966e-05	K17268//coatomer subunit epsilon	XP_710518.1|1.9e-172|coatomer subunit epsilon [Candida albicans SC5314]	GO:0015833//peptide transport;GO:0009987//cellular process;GO:0015031//protein transport;GO:0033036//macromolecule localization;GO:0051649//establishment of localization in cell;GO:0051234//establishment of localization;GO:0042886//amide transport;GO:0051641//cellular localization;GO:0008104//protein localization;GO:0006891//intra-Golgi vesicle-mediated transport;GO:0045184//establishment of prot…
3634804	3634804	XM_718388.2	Known_gene	1	2055982	2059482	NC_032089.1	-	3501	3501	41.86	35.22	34.28	73.96	61.08	61.49	37.12	65.51	-0.822916	0.000115638	3.00394e-05	-0.821173	4.63053e-101	7.72784e-102	-0.794305	1.34536e-79	3.06998e-80	-0.842985	4.45976e-88	9.04286e-89	NA	XP_723481.2|0.0e+00|hypothetical protein CAALFM_C109340CA [Candida albicans SC5314]	NA
3637704	3637704	XM_715552.1	Known_gene	1	688982	689980	NC_032093.1	-	999	999	20.96	21.03	33.56	25.06	32.62	32.6	25.183	30.093	-0.27292	0.331248	0.23892	-0.257748	0.0323974	0.0264726	-0.633308	1.4508e-08	8.81128e-09	0.0418708	0.737783	0.712584	NA	XP_720645.1|2.5e-186|hypothetical protein CAALFM_C503100CA [Candida albicans SC5314]	GO:0003676//nucleic acid binding;GO:0003729//mRNA binding;GO:0000339//RNA cap binding;GO:0000340//RNA 7-methylguanosine cap binding;GO:0003723//RNA binding;GO:0097159//organic cyclic compound binding;GO:0005488//binding;GO:1901363//heterocyclic compound binding;
3647922	3647922	XM_705393.2	Known_gene	1	7510	8043	NC_032090.1	-	534	534	2.39	3.14	0.85	0.16	0.17	0	2.126	0.11	2.98977	0.000720776	0.000222957	3.90087	0.000478802	0.000342514	4.20716	3.04174e-05	2.10664e-05	6.40939	0.0331685	0.0271946	NA	XP_710485.2|7.2e-100|hypothetical protein CAALFM_C200050CA [Candida albicans SC5314]	GO:0071554//cell wall organization or biogenesis;GO:0071852//fungal-type cell wall organization or biogenesis;GO:0009987//cellular process;GO:0045229//external encapsulating structure organization;GO:0071555//cell wall organization;GO:0071840//cellular component organization or biogenesis;GO:0031505//fungal-type cell wall organization;GO:0016043//cellular component organization;GO:0071944//cell p…
30515371	30515371	XM_019475506.1	Known_gene	1	206330	206494	NC_032096.1	+	165	165	103.91	147.71	144.44	74.25	174.02	159.42	132.02	135.896	-0.0457469	0.925027	0.891336	0.484872	0.0533665	0.0443002	-0.236486	0.19016	0.168781	-0.142362	0.429863	0.397634	NA	XP_019331051.1|7.3e-19|hypothetical protein CAALFM_CR00910WA [Candida albicans SC5314]	GO:0016021//integral component of membrane;GO:0110165//cellular anatomical entity;GO:0016020//membrane;GO:0031224//intrinsic component of membrane;GO:0097159//organic cyclic compound binding;GO:1901363//heterocyclic compound binding;GO:0005488//binding;GO:0003676//nucleic acid binding;
3635831	3635831	XM_717446.2	Known_gene	1	334153	335997	NC_032090.1	-	1845	1845	14.21	11.92	17.84	10.95	13.39	13.45	14.656	12.596	0.199307	0.41966	0.32216	0.375976	0.00136521	0.00100549	-0.167772	0.156354	0.137289	0.407509	0.000105957	7.41274e-05	K11786//ATP-dependent helicase STH1/SNF2 [EC:3.6.4.-]	XP_722539.2|0.0e+00|hypothetical protein CAALFM_C201820CA [Candida albicans SC5314]	GO:0006725//cellular aromatic compound metabolic process;GO:0009987//cellular process;GO:0090304//nucleic acid metabolic process;GO:0016070//RNA metabolic process;GO:0043170//macromolecule metabolic process;GO:0008152//metabolic process;GO:0046483//heterocycle metabolic process;GO:1901360//organic cyclic compound metabolic process;GO:0010467//gene expression;GO:0006807//nitrogen compound metaboli…
3638025	GAC1	XM_715252.1	Known_gene	1	115894	117909	NC_032095.1	+	2016	2016	54.9	59.56	53.87	284.95	186.62	172.22	56.11	214.596	-1.91834	4.29308e-13	3.49843e-14	-2.37583	0	0	-1.64769	0	0	-1.6767	0	0	K19849//signaling mucin MSB2+ko04011//MAPK signaling pathway - yeast;K22016//mucin-3/17	XP_720345.1|0.0e+00|protein phosphatase regulator [Candida albicans SC5314]	NA
3641359	POL3	XM_711911.2	Known_gene	1	597970	601086	NC_032095.1	-	3117	3117	19.15	27.97	35.92	41.47	39.05	42.16	27.68	40.893	-0.574079	0.0294278	0.0140116	-1.11472	1.14818e-83	2.17626e-84	-0.481442	1.43817e-19	6.50594e-20	-0.231088	2.74399e-06	1.77294e-06	K02327//DNA polymerase delta subunit 1 [EC:2.7.7.7]+ko03430//Mismatch repair+ko03440//Homologous recombination+ko03420//Nucleotide excision repair+ko03030//DNA replication+ko03410//Base excision repair	XP_717004.2|0.0e+00|DNA-directed DNA polymerase delta [Candida albicans SC5314]	GO:0006278//RNA-dependent DNA biosynthetic process;GO:0019438//aromatic compound biosynthetic process;GO:0018130//heterocycle biosynthetic process;GO:1901575//organic substance catabolic process;GO:0009059//macromolecule biosynthetic process;GO:0071704//organic substance metabolic process;GO:0006139//nucleobase-containing compound metabolic process;GO:0034641//cellular nitrogen compound metabolic…
3643194	PRP13	XM_710035.2	Known_gene	1	849445	852048	NC_032096.1	+	2604	2604	68.65	39.14	44.76	44.2	49.82	49.15	50.85	47.723	0.0828475	0.799996	0.732538	0.635213	1.19201e-44	3.3771e-45	-0.348081	7.15815e-12	3.90206e-12	-0.134981	0.00655624	0.00511216	NA	XP_715128.2|0.0e+00|Prp13p [Candida albicans SC5314]	GO:0000002//mitochondrial genome maintenance;GO:0043170//macromolecule metabolic process;GO:0009987//cellular process;GO:0016070//RNA metabolic process;GO:0007005//mitochondrion organization;GO:0006396//RNA processing;GO:0006996//organelle organization;GO:0071840//cellular component organization or biogenesis;GO:0008152//metabolic process;GO:1901360//organic cyclic compound metabolic process;GO:0…
3643912	3643912	XM_709366.2	Known_gene	1	1753778	1755259	NC_032090.1	+	1482	1482	278.32	273.28	278.48	142.26	150.26	126.15	276.693	139.556	0.965711	1.93853e-08	2.71369e-09	0.968215	5.38477e-199	5.47984e-200	0.862919	1.73593e-162	2.4555e-163	1.14243	3.63921e-260	3.49248e-261	K01309//ubiquitin carboxyl-terminal hydrolase MINDY-1/2 [EC:3.4.19.12]	XP_714459.2|2.0e-285|hypothetical protein CAALFM_C208620WA [Candida albicans SC5314]	GO:0044260//cellular macromolecule metabolic process;GO:0044237//cellular metabolic process;GO:0016579//protein deubiquitination;GO:0008152//metabolic process;GO:0036211//protein modification process;GO:1901564//organonitrogen compound metabolic process;GO:0019538//protein metabolic process;GO:0006807//nitrogen compound metabolic process;GO:0070647//protein modification by small protein conjugati…
3645718	DSL1	XM_707567.2	Known_gene	1	1487266	1489308	NC_032096.1	+	2043	2043	5.89	5.51	6.64	4.87	4.55	5.72	6.013	5.046	0.235751	0.358888	0.264227	0.274346	0.116401	0.0999994	0.276186	0.11827	0.102488	0.215168	0.188818	0.165853	K11578//protein transport protein DSL1/ZW10	XP_712660.2|0.0e+00|Dsl1p [Candida albicans SC5314]	NA
6335359	6335359	XM_441049.2	Known_gene	1	1298889	1299875	NC_032096.1	+	987	987	86.39	61.36	66.4	96.82	110.53	116.11	71.383	107.82	-0.597204	0.00634078	0.00247811	-0.164441	0.00574594	0.00441664	-0.849068	1.4791e-41	4.76668e-42	-0.806237	2.69074e-40	8.27576e-41	K08266//target of rapamycin complex subunit LST8+ko04136//Autophagy - other+ko04138//Autophagy - yeast	XP_441049.1|1.1e-191|TOR complex subunit [Candida albicans SC5314]	GO:0051128//regulation of cellular component organization;GO:0031929//TOR signaling;GO:0050789//regulation of biological process;GO:0007154//cell communication;GO:0050794//regulation of cellular process;GO:0023052//signaling;GO:0050896//response to stimulus;GO:0065007//biological regulation;GO:0033043//regulation of organelle organization;GO:0009987//cellular process;GO:0007165//signal transducti…
30515140	30515140	XM_019475247.1	Known_gene	1	1345071	1345313	NC_032090.1	-	243	243	6.45	5.75	1.16	1.09	1.72	2.19	4.453	1.666	1.1025	0.226751	0.150162	2.56497	0.0121192	0.00954964	1.74115	0.0677499	0.0574772	-0.916806	0.522174	0.49155	NA	XP_019330792.1|2.1e-38|hypothetical protein CAALFM_C206610CA, partial [Candida albicans SC5314]	GO:0110165//cellular anatomical entity;GO:0016020//membrane;GO:0016021//integral component of membrane;GO:0031224//intrinsic component of membrane;
3646150	VPS16	XM_707143.2	Known_gene	1	936078	938918	NC_032089.1	-	2841	2841	11.42	9.98	14.78	11.83	15.45	16.87	12.06	14.716	-0.297052	0.227668	0.15094	-0.0508874	0.603635	0.573272	-0.630495	5.28911e-12	2.87438e-12	-0.190814	0.02038	0.0164581	K20180//vacuolar protein sorting-associated protein 16+ko04138//Autophagy - yeast	XP_712236.2|0.0e+00|tethering complex subunit [Candida albicans SC5314]	GO:0050794//regulation of cellular process;GO:0045184//establishment of protein localization;GO:0016197//endosomal transport;GO:0035542//regulation of SNARE complex assembly;GO:0006996//organelle organization;GO:0065007//biological regulation;GO:0006810//transport;GO:0009607//response to biotic stimulus;GO:0009987//cellular process;GO:0042886//amide transport;GO:0060627//regulation of vesicle-med…
3647650	TOM22	XM_705653.1	Known_gene	1	571203	571655	NC_032095.1	+	453	453	210.15	254.55	365.92	174.52	176.39	161.35	276.873	170.753	0.655168	0.00825898	0.00333491	0.268027	0.000204946	0.000143674	0.52918	2.8234e-16	1.37237e-16	1.18133	7.28518e-85	1.50389e-85	K17769//mitochondrial import receptor subunit TOM22	XP_710745.1|1.6e-76|Tom22p [Candida albicans SC5314]	GO:0065002//intracellular protein transmembrane transport;GO:0090151//establishment of protein localization to mitochondrial membrane;GO:0009987//cellular process;GO:0072657//protein localization to membrane;GO:0015833//peptide transport;GO:0007008//outer mitochondrial membrane organization;GO:0006839//mitochondrial transport;GO:0071840//cellular component organization or biogenesis;GO:0034613//c…
3639331	RIC1	XM_713905.2	Known_gene	1	119767	122808	NC_032089.1	+	3042	3042	5.13	4.54	6.69	3.77	4.25	6.14	5.453	4.72	0.192993	0.533592	0.434381	0.444394	0.00354461	0.00268148	0.0952295	0.541098	0.513118	0.123768	0.344302	0.313784	K20476//RAB6A-GEF complex partner protein 1	XP_718998.2|0.0e+00|Ric1p [Candida albicans SC5314]	GO:0033036//macromolecule localization;GO:0046907//intracellular transport;GO:0009987//cellular process;GO:0006886//intracellular protein transport;GO:0015031//protein transport;GO:0006810//transport;GO:0070727//cellular macromolecule localization;GO:0071705//nitrogen compound transport;GO:0051641//cellular localization;GO:0016197//endosomal transport;GO:0015833//peptide transport;GO:0045184//est…
3644022	EXO84	XM_709248.2	Known_gene	1	245451	247826	NC_032094.1	+	2376	2376	31.4	31.87	27.71	24.02	24.13	27.02	30.326	25.056	0.268145	0.192639	0.122862	0.386528	1.44982e-08	8.29708e-09	0.401371	2.5595e-09	1.5182e-09	0.036379	0.630305	0.602056	K19986//exocyst complex component 8	XP_714341.2|0.0e+00|exocyst subunit [Candida albicans SC5314]	GO:0071702//organic substance transport;GO:0051234//establishment of localization;GO:0006887//exocytosis;GO:0015031//protein transport;GO:0032940//secretion by cell;GO:0046903//secretion;GO:0006810//transport;GO:0015833//peptide transport;GO:0045184//establishment of protein localization;GO:0098876//vesicle-mediated transport to the plasma membrane;GO:0071705//nitrogen compound transport;GO:00081…
3640397	3640397	XM_712863.1	Known_gene	1	200121	201206	NC_032096.1	+	1086	1086	10.31	5.61	13.47	27.42	24.99	27.66	9.796	26.69	-1.44004	3.22682e-06	6.327e-07	-1.41118	1.48622e-26	5.4409e-27	-2.15528	5.43097e-43	1.71762e-43	-1.03805	3.91116e-17	1.79853e-17	NA	XP_717956.1|9.5e-200|hypothetical protein CAALFM_CR00880WA [Candida albicans SC5314]	NA
3642775	SDH12	XM_710435.2	Known_gene	1	1478187	1480112	NC_032092.1	-	1926	1926	161.65	88.63	129.47	458.86	582.6	583.32	126.583	541.593	-2.07285	4.57096e-17	2.35656e-18	-1.50518	0	0	-2.71664	0	0	-2.17167	0	0	K00234//succinate dehydrogenase (ubiquinone) flavoprotein subunit [EC:1.3.5.1]+ko00020//Citrate cycle (TCA cycle)+ko01100//Metabolic pathways+ko01130//Biosynthesis of antibiotics+ko00190//Oxidative phosphorylation+ko01110//Biosynthesis of secondary metabolites+ko01200//Carbon metabolism	EMG47017.1|0.0e+00|Flavoprotein subunit of succinate dehydrogenase, putative [Candida maltosa Xu316]	GO:0015980//energy derivation by oxidation of organic compounds;GO:0055114//oxidation-reduction process;GO:0006091//generation of precursor metabolites and energy;GO:0044237//cellular metabolic process;GO:0044238//primary metabolic process;GO:0009987//cellular process;GO:0009060//aerobic respiration;GO:0022900//electron transport chain;GO:0006099//tricarboxylic acid cycle;GO:0008152//metabolic pr…
3642976	3642976	XM_710269.2	Known_gene	1	564861	568430	NC_032090.1	-	3570	3570	6.22	5.99	5.86	9.59	10.95	11.56	6.023	10.7	-0.827529	7.57733e-06	1.57772e-06	-0.624616	1.67951e-09	9.32344e-10	-0.870303	3.82546e-18	1.77586e-18	-0.980169	8.21179e-23	3.33014e-23	K02948//small subunit ribosomal protein S11+ko03010//Ribosome	XP_715362.2|0.0e+00|hypothetical protein CAALFM_C202840CA [Candida albicans SC5314]	GO:0046907//intracellular transport;GO:0098876//vesicle-mediated transport to the plasma membrane;GO:0051179//localization;GO:0051641//cellular localization;GO:0016482//cytosolic transport;GO:0016197//endosomal transport;GO:0009987//cellular process;GO:0051234//establishment of localization;GO:0016192//vesicle-mediated transport;GO:0051649//establishment of localization in cell;GO:0006810//transp…
3640535	SWD1	XM_712670.2	Known_gene	1	116945	118288	NC_032091.1	-	1344	1344	56.37	84.84	65.3	44.75	38.05	37.37	68.836	40.056	0.757467	0.00317973	0.00113958	0.33304	1.53372e-06	9.62024e-07	1.15685	2.67979e-74	6.3564e-75	0.805202	1.04485e-31	3.6401e-32	K14961//COMPASS component SWD1	XP_717763.1|2.2e-262|COMPASS subunit protein [Candida albicans SC5314]	GO:1990234//transferase complex;GO:0005654//nucleoplasm;GO:0048188//Set1C/COMPASS complex;GO:1902494//catalytic complex;GO:0005634//nucleus;GO:0032991//protein-containing complex;GO:0031974//membrane-enclosed lumen;GO:0043226//organelle;GO:0035097//histone methyltransferase complex;GO:0043231//intracellular membrane-bounded organelle;GO:0070013//intracellular organelle lumen;GO:0043233//organelle…
3647732	CKS1	XM_705571.2	Known_gene	1	909565	909873	NC_032093.1	-	309	309	43.17	34.55	66.53	95.9	98.69	102.03	48.083	98.873	-1.05571	0.000151147	4.05204e-05	-1.1515	1.2108e-13	5.85838e-14	-1.51422	4.78158e-20	2.13596e-20	-0.616916	4.59788e-06	3.00984e-06	K02219//cyclin-dependent kinase regulatory subunit CKS1+ko04111//Cell cycle - yeast	XP_710663.1|5.3e-55|cyclin-dependent protein kinase regulatory subunit [Candida albicans SC5314]	GO:0010564//regulation of cell cycle process;GO:0051247//positive regulation of protein metabolic process;GO:0042327//positive regulation of phosphorylation;GO:0065009//regulation of molecular function;GO:0001934//positive regulation of protein phosphorylation;GO:0010604//positive regulation of macromolecule metabolic process;GO:0045787//positive regulation of cell cycle;GO:0042325//regulation of…
3635799	3635799	XM_717413.1	Known_gene	1	270227	270661	NC_032090.1	+	435	435	36.78	32.6	36.07	25.68	28.63	30.64	35.15	28.316	0.288831	0.251969	0.170466	0.518276	0.00453262	0.00345684	0.187344	0.309342	0.282768	0.235383	0.212467	0.188042	K03142//transcription initiation factor TFIIH subunit 2+ko03420//Nucleotide excision repair+ko03022//Basal transcription factors	XP_722506.1|2.0e-76|hypothetical protein CAALFM_C201500WA [Candida albicans SC5314]	NA
3647252	SPB4	XM_706266.2	Known_gene	1	355185	357080	NC_032093.1	-	1896	1896	79.01	76.4	83.87	71.06	57.15	70.37	79.76	66.193	0.251931	0.213399	0.138729	0.152998	0.0013121	0.00096419	0.418819	1.30426e-17	6.14818e-18	0.253194	4.91178e-08	2.94936e-08	K14809//ATP-dependent RNA helicase DDX55/SPB4 [EC:3.6.4.13]	XP_711358.2|0.0e+00|putative ATP-dependent RNA helicase [Candida albicans SC5314]	GO:0006396//RNA processing;GO:0046483//heterocycle metabolic process;GO:0022613//ribonucleoprotein complex biogenesis;GO:0006364//rRNA processing;GO:0006807//nitrogen compound metabolic process;GO:0006725//cellular aromatic compound metabolic process;GO:0016072//rRNA metabolic process;GO:0008152//metabolic process;GO:0043170//macromolecule metabolic process;GO:0034641//cellular nitrogen compound …
30515354	STE18	XM_019475486.1	Known_gene	1	373998	374338	NC_032095.1	-	341	273	10.47	9.76	9.45	25.72	36.68	34.59	9.893	32.33	-1.66617	4.29568e-06	8.57993e-07	-1.29663	0.000198376	0.00013887	-1.91004	4.50957e-09	2.6922e-09	-1.87197	1.17497e-08	6.84782e-09	K07973//guanine nucleotide-binding protein subunit gamma, other+ko04011//MAPK signaling pathway - yeast	XP_019331031.1|8.3e-44|Ste18p [Candida albicans SC5314]	GO:0031136//positive regulation of conjugation;GO:2000243//positive regulation of reproductive process;GO:0050789//regulation of biological process;GO:0048518//positive regulation of biological process;GO:0009987//cellular process;GO:0046999//regulation of conjugation;GO:0023052//signaling;GO:0050896//response to stimulus;GO:0048522//positive regulation of cellular process;GO:0051716//cellular re…
3634933	3634933	XM_718320.2	Known_gene	1	1895260	1895835	NC_032089.1	-	576	576	132.08	116.57	128.67	70.1	95.92	93.83	125.773	86.616	0.520724	0.00936418	0.0038606	0.913926	6.29915e-29	2.20638e-29	0.281293	0.000351088	0.000256684	0.455555	6.35078e-09	3.6727e-09	K19932//neuronal calcium sensor 1	XP_723413.2|2.7e-105|frequenin [Candida albicans SC5314]	GO:0005488//binding;GO:0043167//ion binding;GO:0046872//metal ion binding;GO:0043169//cation binding;GO:0005509//calcium ion binding;
3640189	3640189	XM_713053.1	Known_gene	1	262217	263083	NC_032089.1	-	867	867	39.91	25.82	21.47	33.32	35.64	38.27	29.066	35.743	-0.295984	0.370535	0.274959	0.260362	0.0151948	0.0120693	-0.465008	4.15822e-05	2.89376e-05	-0.833892	4.58753e-13	2.32434e-13	NA	XP_718146.1|5.1e-164|hypothetical protein CAALFM_C101340CA [Candida albicans SC5314]	GO:0016020//membrane;GO:0110165//cellular anatomical entity;GO:0031224//intrinsic component of membrane;GO:0016021//integral component of membrane;
3641344	IFA21	XM_711868.2	Known_gene	1	687921	690194	NC_032095.1	+	2274	2274	4.11	6.58	7.51	13.11	8.82	9.58	6.066	10.503	-0.797056	0.0134099	0.00574262	-1.67346	5.17626e-36	1.62254e-36	-0.422691	0.00143006	0.00108251	-0.351213	0.0054197	0.00420338	K11801//WD repeat-containing protein 23	XP_716961.2|0.0e+00|Ifa21p [Candida albicans SC5314]	NA
3639525	3639525	XM_713715.2	Known_gene	1	1473495	1474850	NC_032089.1	-	1356	1356	23.47	19.24	22.81	16.9	19.89	22.84	21.84	19.876	0.1249	0.604587	0.507359	0.473795	1.48405e-05	9.72396e-06	-0.0479345	0.675369	0.652162	-0.0018962	0.960401	0.95432	NA	XP_718808.2|8.1e-257|hypothetical protein CAALFM_C106920CA [Candida albicans SC5314]	GO:0031224//intrinsic component of membrane;GO:0016020//membrane;GO:0016021//integral component of membrane;GO:0110165//cellular anatomical entity;
3639887	3639887	XM_713400.1	Known_gene	1	1211015	1211707	NC_032089.1	-	693	693	24.66	15.83	19.66	25.44	28.36	28.34	20.05	27.38	-0.457504	0.0874679	0.0486288	-0.0449259	0.733699	0.708892	-0.841196	5.62656e-08	3.50358e-08	-0.527576	0.000294361	0.000210692	NA	XP_718493.1|1.4e-127|hypothetical protein CAALFM_C105800CA [Candida albicans SC5314]	GO:0060255//regulation of macromolecule metabolic process;GO:0044786//cell cycle DNA replication;GO:0043170//macromolecule metabolic process;GO:0008152//metabolic process;GO:0019222//regulation of metabolic process;GO:0006260//DNA replication;GO:0044237//cellular metabolic process;GO:0050789//regulation of biological process;GO:0006259//DNA metabolic process;GO:1901360//organic cyclic compound me…
3644769	PIL1	XM_708495.2	Known_gene	1	973480	974406	NC_032089.1	+	927	927	1596.54	938.81	932.53	1412.33	2029.06	1926.26	1155.96	1789.22	-0.61955	0.0390724	0.019312	0.176871	4.26129e-29	1.49117e-29	-1.11191	0	0	-1.04658	0	0	K12666//oligosaccharyltransferase complex subunit alpha (ribophorin I)+ko04141//Protein processing in endoplasmic reticulum+ko01100//Metabolic pathways+ko00513//Various types of N-glycan biosynthesis+ko00510//N-Glycan biosynthesis;K06126//ubiquinone biosynthesis monooxygenase Coq6 [EC:1.14.13.-]+ko00130//Ubiquinone and other terpenoid-quinone biosynthesis+ko01100//Metabolic pathways+ko01110//Bios…	XP_713588.2|3.5e-171|lipid-binding protein [Candida albicans SC5314]	GO:0051248//negative regulation of protein metabolic process;GO:0051171//regulation of nitrogen compound metabolic process;GO:0006897//endocytosis;GO:0009892//negative regulation of metabolic process;GO:0045859//regulation of protein kinase activity;GO:0016043//cellular component organization;GO:0043549//regulation of kinase activity;GO:0051234//establishment of localization;GO:0050789//regulatio…
3638904	3638904	XM_714466.2	Known_gene	1	26026	27414	NC_032090.1	-	1389	1389	98.86	79.06	86.85	70.29	88.43	98.52	88.256	85.746	0.0350751	0.89461	0.849976	0.492067	3.68692e-21	1.49958e-21	-0.161588	0.00204686	0.00156238	-0.181891	0.000189902	0.000134596	NA	XP_719559.1|1.4e-259|peroxisome biogenesis protein [Candida albicans SC5314]	GO:0016043//cellular component organization;GO:0009987//cellular process;GO:0007031//peroxisome organization;GO:0006996//organelle organization;GO:0071840//cellular component organization or biogenesis;GO:0043231//intracellular membrane-bounded organelle;GO:0016020//membrane;GO:0098805//whole membrane;GO:0005779//integral component of peroxisomal membrane;GO:0043229//intracellular organelle;GO:00…
3643945	RAP1	XM_709325.2	Known_gene	1	2066873	2068165	NC_032090.1	+	1293	1293	69.2	52.22	48.05	68.13	72.58	69.94	56.49	70.216	-0.317416	0.199321	0.127953	0.0224818	0.771024	0.748808	-0.47497	3.50156e-14	1.79488e-14	-0.541581	3.53177e-17	1.62231e-17	K09426//Myb-like DNA-binding protein RAP1	XP_714418.2|2.2e-251|DNA-binding transcription factor [Candida albicans SC5314]	GO:0050789//regulation of biological process;GO:2000220//regulation of pseudohyphal growth;GO:0009987//cellular process;GO:0050794//regulation of cellular process;GO:1900428//regulation of filamentous growth of a population of unicellular organisms;GO:0060249//anatomical structure homeostasis;GO:0051276//chromosome organization;GO:0042592//homeostatic process;GO:0071840//cellular component organi…
3641233	3641233	XM_712078.1	Known_gene	1	2225780	2226865	NC_032090.1	-	1086	1086	163.45	205.08	210.19	243.79	273.4	250.73	192.906	255.973	-0.418476	0.0288729	0.0137138	-0.57679	6.19936e-52	1.60973e-52	-0.414826	3.39019e-32	1.23167e-32	-0.254441	4.97992e-13	2.52564e-13	K01599//uroporphyrinogen decarboxylase [EC:4.1.1.37]+ko00860//Porphyrin and chlorophyll metabolism+ko01100//Metabolic pathways+ko01110//Biosynthesis of secondary metabolites	XP_717171.1|1.3e-212|uroporphyrinogen decarboxylase [Candida albicans SC5314]	GO:0018130//heterocycle biosynthetic process;GO:0006778//porphyrin-containing compound metabolic process;GO:0071704//organic substance metabolic process;GO:0006782//protoporphyrinogen IX biosynthetic process;GO:0044271//cellular nitrogen compound biosynthetic process;GO:1901362//organic cyclic compound biosynthetic process;GO:0044237//cellular metabolic process;GO:1901360//organic cyclic compound…
3638371	SAP8	XM_714848.2	Known_gene	1	548135	549352	NC_032091.1	-	1218	1218	4.09	4.31	4.19	5.33	6.44	5.18	4.196	5.65	-0.431264	0.161717	0.0994294	-0.382035	0.11663	0.100235	-0.579373	0.0105918	0.0084505	-0.306002	0.2103	0.185949	K06005//candidapepsin [EC:3.4.23.24]	XP_719941.1|5.6e-225|Sap8p [Candida albicans SC5314]	GO:0071704//organic substance metabolic process;GO:0030163//protein catabolic process;GO:0006508//proteolysis;GO:0044238//primary metabolic process;GO:0009405//pathogenesis;GO:0044419//interspecies interaction between organisms;GO:0006807//nitrogen compound metabolic process;GO:0009056//catabolic process;GO:0043170//macromolecule metabolic process;GO:0019538//protein metabolic process;GO:0009987/…
3636511	3636511	XM_716758.2	Known_gene	1	996127	996717	NC_032093.1	-	591	591	16.88	10.85	13.96	7.15	10.13	14.35	13.896	10.543	0.377631	0.334065	0.241507	1.2393	2.49352e-07	1.50342e-07	0.0990609	0.702617	0.681052	-0.0397518	0.82292	0.804136	K12189//ESCRT-II complex subunit VPS25+ko04144//Endocytosis	XP_721851.1|4.6e-108|ESCRT-II subunit protein [Candida albicans SC5314]	GO:0043328//protein transport to vacuole involved in ubiquitin-dependent protein catabolic process via the multivesicular body sorting pathway;GO:0019941//modification-dependent protein catabolic process;GO:1901575//organic substance catabolic process;GO:0006807//nitrogen compound metabolic process;GO:0033036//macromolecule localization;GO:0044257//cellular protein catabolic process;GO:0051649//e…
3644762	3644762	XM_708500.2	Known_gene	1	954196	957687	NC_032089.1	-	3492	3492	32.07	28.17	27.22	34.79	31.24	34.51	29.153	33.513	-0.208476	0.321229	0.230197	-0.117448	0.0207216	0.0166628	-0.149235	0.00568929	0.00445558	-0.342347	5.8949e-11	3.18808e-11	K01530//phospholipid-translocating ATPase [EC:7.6.2.1]	XP_713593.2|0.0e+00|putative aminophospholipid-translocating P4-type ATPase [Candida albicans SC5314]	GO:0016192//vesicle-mediated transport;GO:0015711//organic anion transport;GO:0015914//phospholipid transport;GO:0016043//cellular component organization;GO:0065008//regulation of biological quality;GO:0006810//transport;GO:0015748//organophosphate ester transport;GO:0097035//regulation of membrane lipid distribution;GO:0006811//ion transport;GO:0006820//anion transport;GO:0006869//lipid transpor…
3643469	BUD14	XM_709821.2	Known_gene	1	1083758	1086160	NC_032090.1	+	2403	2403	35.8	35.13	35.45	105.8	112.56	94.23	35.46	104.196	-1.55507	1.95423e-19	8.51501e-21	-1.56331	6.59214e-270	5.19334e-271	-1.67992	0	0	-1.4104	7.01015e-207	8.08234e-208	K02309//regulatory subunit for Cdc7p protein kinase+ko04113//Meiosis - yeast+ko04111//Cell cycle - yeast;K06062//histone acetyltransferase [EC:2.3.1.48]	XP_714914.2|0.0e+00|protein phosphatase regulator [Candida albicans SC5314]	NA
3639539	CYK3	XM_713738.2	Known_gene	1	1431951	1432876	NC_032089.1	+	926	926	15.93	19.31	16.45	22.99	30.98	24.03	17.23	26	-0.592906	0.0177685	0.00794014	-0.52926	0.000109914	7.56438e-05	-0.681989	1.72592e-08	1.05196e-08	-0.546749	4.33093e-05	2.97652e-05	K20520//drebrin-like protein;K20522//LAS seventeen-binding protein 1/2;K04705//signal transducing adaptor molecule+ko04144//Endocytosis;K20521//myosin tail region-interacting protein MTI1	KGQ99046.1|1.8e-175|hypothetical protein MEU_00646, partial [Candida albicans P37005]	GO:0030427//site of polarized growth;GO:0110165//cellular anatomical entity;GO:0005933//cellular bud;GO:0005935//cellular bud neck;
30515029	30515029	XM_019475130.1	Known_gene	1	1762963	1763349	NC_032089.1	-	387	387	322.7	302.7	379.2	233.77	347.4	312.38	334.866	297.85	0.147592	0.53375	0.434598	0.465104	1.6743e-12	8.4217e-13	-0.198709	0.000767548	0.000572684	0.279657	5.41361e-06	3.55736e-06	K11353//NADH dehydrogenase (ubiquinone) 1 alpha subcomplex subunit 13+ko01100//Metabolic pathways+ko00190//Oxidative phosphorylation	XP_019330675.1|2.5e-70|hypothetical protein CAALFM_C108080CA [Candida albicans SC5314]	GO:0016021//integral component of membrane;GO:0110165//cellular anatomical entity;GO:0031224//intrinsic component of membrane;GO:0016020//membrane;GO:0016651//oxidoreductase activity, acting on NAD(P)H;GO:0016655//oxidoreductase activity, acting on NAD(P)H, quinone or similar compound as acceptor;GO:0050136//NADH dehydrogenase (quinone) activity;GO:0008137//NADH dehydrogenase (ubiquinone) activit…
3638416	3638416	XM_714875.2	Known_gene	1	603064	603378	NC_032091.1	+	315	315	39.21	13.46	19.63	77.95	80.67	84.23	24.1	80.95	-1.70128	9.55525e-06	2.01816e-06	-0.991327	1.86346e-09	1.0357e-09	-2.58335	3.85643e-33	1.3824e-33	-2.10127	6.13706e-28	2.28018e-28	NA	XP_719968.2|9.8e-57|hypothetical protein CAALFM_C302790WA [Candida albicans SC5314]	NA
3643784	IPK2	XM_709458.2	Known_gene	1	1987847	1988899	NC_032090.1	-	1053	1053	763.67	690.84	525.54	53.52	57.88	63.35	660.016	58.25	3.45266	5.96858e-57	4.16897e-59	3.8348	0	0	3.57721	0	0	3.05238	0	0	K00915//inositol-polyphosphate multikinase [EC:2.7.1.140 2.7.1.151]+ko01100//Metabolic pathways+ko04138//Autophagy - yeast+ko04070//Phosphatidylinositol signaling system+ko00562//Inositol phosphate metabolism	XP_714551.1|2.5e-197|inositol polyphosphate multikinase [Candida albicans SC5314]	GO:1901576//organic substance biosynthetic process;GO:0044281//small molecule metabolic process;GO:0019751//polyol metabolic process;GO:0046165//alcohol biosynthetic process;GO:0019637//organophosphate metabolic process;GO:0044283//small molecule biosynthetic process;GO:0009987//cellular process;GO:1901615//organic hydroxy compound metabolic process;GO:0006796//phosphate-containing compound metab…
3638485	3638485	XM_714752.1	Known_gene	1	1699250	1700236	NC_032091.1	+	987	987	110.61	182.76	192.85	201.16	211.33	179.27	162.073	197.253	-0.297811	0.305123	0.21556	-0.862862	1.00746e-76	2.03204e-77	-0.209547	3.38482e-07	2.16696e-07	0.105345	0.0213716	0.017291	K03247//translation initiation factor 3 subunit H+ko03013//RNA transport	XP_719845.1|3.0e-184|hypothetical protein CAALFM_C307420WA [Candida albicans SC5314]	GO:0009059//macromolecule biosynthetic process;GO:0010467//gene expression;GO:0002181//cytoplasmic translation;GO:0071826//ribonucleoprotein complex subunit organization;GO:0008152//metabolic process;GO:0043933//protein-containing complex subunit organization;GO:0044260//cellular macromolecule metabolic process;GO:0044271//cellular nitrogen compound biosynthetic process;GO:0006412//translation;GO…
3645033	SUB2	XM_019475351.1	Known_gene	1	33383	34763	NC_032092.1	-	1381	1302	279.85	219.94	243.55	257.25	277.25	266.2	247.78	266.9	-0.118647	0.568231	0.469006	0.121483	0.000100987	6.93152e-05	-0.334077	5.62144e-27	2.20638e-27	-0.128293	1.91253e-05	1.29021e-05	K12812//ATP-dependent RNA helicase UAP56/SUB2 [EC:3.6.4.13]+ko03040//Spliceosome+ko03013//RNA transport+ko03015//mRNA surveillance pathway	SGZ49365.1|1.6e-233|CIC11C00000000937 [[Candida] intermedia]	GO:0031327//negative regulation of cellular biosynthetic process;GO:0000398//mRNA splicing, via spliceosome;GO:0006807//nitrogen compound metabolic process;GO:0006886//intracellular protein transport;GO:0010468//regulation of gene expression;GO:1901360//organic cyclic compound metabolic process;GO:0051179//localization;GO:0050896//response to stimulus;GO:0032774//RNA biosynthetic process;GO:19035…
3647399	3647399	XM_705916.2	Known_gene	1	826496	828007	NC_032091.1	-	1512	1512	19.78	21.54	20.87	5.08	4.87	5.49	20.73	5.146	1.9772	1.28894e-22	4.39436e-24	1.96114	1.72037e-43	4.95424e-44	2.14502	5.84601e-53	1.65288e-53	1.92655	1.22077e-44	3.56956e-45	NA	XP_711008.2|1.2e-296|hypothetical protein CAALFM_C303980CA [Candida albicans SC5314]	GO:0016020//membrane;GO:0110165//cellular anatomical entity;GO:0016021//integral component of membrane;GO:0031224//intrinsic component of membrane;
3643877	RPT6	XM_709347.2	Known_gene	1	1784325	1785530	NC_032090.1	+	1206	1206	354.91	291	232.02	290.91	313.27	310.75	292.643	304.976	-0.0627432	0.831962	0.771083	0.28688	3.3732e-23	1.31804e-23	-0.106387	0.000342742	0.00025041	-0.421505	1.24926e-42	3.73612e-43	K03066//26S proteasome regulatory subunit T6+ko03050//Proteasome	XP_714440.2|1.6e-224|proteasome regulatory particle base subunit [Candida albicans SC5314]	GO:0009893//positive regulation of metabolic process;GO:0050789//regulation of biological process;GO:0045944//positive regulation of transcription by RNA polymerase II;GO:0071704//organic substance metabolic process;GO:0060261//positive regulation of transcription initiation from RNA polymerase II promoter;GO:0010468//regulation of gene expression;GO:0051252//regulation of RNA metabolic process;G…
3647071	COX15	XM_706236.2	Known_gene	1	124508	125947	NC_032094.1	-	1440	1440	110.28	92.95	163.85	79.43	124.09	115.31	122.36	106.276	0.181063	0.556926	0.457734	0.473415	9.22957e-23	3.63864e-23	-0.41686	9.11696e-21	4.00112e-21	0.506858	3.09638e-37	9.93606e-38	K02259//cytochrome c oxidase assembly protein subunit 15+ko00860//Porphyrin and chlorophyll metabolism+ko01100//Metabolic pathways+ko00190//Oxidative phosphorylation+ko01110//Biosynthesis of secondary metabolites	XP_711328.2|8.2e-276|Cox15p [Candida albicans SC5314]	GO:0042440//pigment metabolic process;GO:0006778//porphyrin-containing compound metabolic process;GO:0006783//heme biosynthetic process;GO:1901564//organonitrogen compound metabolic process;GO:1901576//organic substance biosynthetic process;GO:0006779//porphyrin-containing compound biosynthetic process;GO:1901566//organonitrogen compound biosynthetic process;GO:0033014//tetrapyrrole biosynthetic …
3642825	3642825	XM_710462.1	Known_gene	1	1412344	1413132	NC_032092.1	-	789	789	8.96	11.69	10.25	4.89	1.71	2.46	10.3	3.02	1.65254	0.000145957	3.89833e-05	0.873664	0.000832885	0.000604688	2.77321	3.38972e-19	1.54417e-19	2.05889	2.66852e-12	1.3845e-12	K18337//L-rhamnose 1-dehydrogenase [EC:1.1.1.378 1.1.1.377 1.1.1.173]+ko00051//Fructose and mannose metabolism;K17742//sorbose reductase [EC:1.1.1.289]+ko00051//Fructose and mannose metabolism	XP_715555.1|5.4e-144|hypothetical protein CAALFM_C406360CA [Candida albicans SC5314]	GO:0044281//small molecule metabolic process;GO:1901615//organic hydroxy compound metabolic process;GO:0009987//cellular process;GO:0071704//organic substance metabolic process;GO:0044255//cellular lipid metabolic process;GO:0044237//cellular metabolic process;GO:0006721//terpenoid metabolic process;GO:0034308//primary alcohol metabolic process;GO:0006720//isoprenoid metabolic process;GO:0055114/…
3643135	3643135	XM_710122.1	Known_gene	1	887242	888585	NC_032095.1	-	1344	1344	103.27	72.05	92.88	148.24	132.98	183.32	89.4	154.846	-0.795119	0.000358128	0.000104764	-0.521514	6.91124e-34	2.24696e-34	-0.884139	7.97824e-75	1.8831e-75	-0.980924	7.41629e-122	1.24305e-122	K13535//cardiolipin-specific phospholipase [EC:3.1.1.-]+ko00564//Glycerophospholipid metabolism	XP_715215.1|2.0e-260|hypothetical protein CAALFM_C704090CA [Candida albicans SC5314]	GO:0042592//homeostatic process;GO:0071704//organic substance metabolic process;GO:0008152//metabolic process;GO:0019637//organophosphate metabolic process;GO:0046486//glycerolipid metabolic process;GO:0044255//cellular lipid metabolic process;GO:0009987//cellular process;GO:0006644//phospholipid metabolic process;GO:0006629//lipid metabolic process;GO:0006793//phosphorus metabolic process;GO:006…
3640205	ZCF17	XM_713035.2	Known_gene	1	236084	238300	NC_032089.1	-	2217	2217	29.16	25.74	19.73	60.7	62.96	74.44	24.876	66.033	-1.38825	1.72392e-09	2.08143e-10	-1.05771	1.03204e-78	2.04208e-79	-1.29042	3.24301e-112	6.05866e-113	-1.91569	4.15376e-232	4.3946e-233	K21632//white-opaque regulator 2	XP_718128.2|0.0e+00|Zcf17p [Candida albicans SC5314]	GO:0019222//regulation of metabolic process;GO:0070784//regulation of growth of unicellular organism as a thread of attached cells;GO:0051171//regulation of nitrogen compound metabolic process;GO:0010570//regulation of filamentous growth;GO:1903508//positive regulation of nucleic acid-templated transcription;GO:0006355//regulation of transcription, DNA-templated;GO:0010604//positive regulation of…
3646398	FDH1	XM_706891.1	Known_gene	1	1117036	1118175	NC_032096.1	-	1140	1140	31.43	17.55	15.31	204.52	188.66	249.25	21.43	214.143	-3.23849	3.74071e-27	9.95366e-29	-2.70203	0	0	-3.42625	0	0	-4.02505	0	0	K00122//formate dehydrogenase [EC:1.17.1.9]+ko01100//Metabolic pathways+ko00680//Methane metabolism+ko01200//Carbon metabolism+ko00630//Glyoxylate and dicarboxylate metabolism	XP_711984.1|3.1e-217|formate dehydrogenase (NAD+) [Candida albicans SC5314]	GO:0071704//organic substance metabolic process;GO:0009069//serine family amino acid metabolic process;GO:0009063//cellular amino acid catabolic process;GO:1901575//organic substance catabolic process;GO:1901606//alpha-amino acid catabolic process;GO:1901565//organonitrogen compound catabolic process;GO:0009056//catabolic process;GO:0006520//cellular amino acid metabolic process;GO:0044281//small…
3647873	3647873	XM_705420.2	Known_gene	1	15563	15979	NC_032093.1	-	417	417	93.43	70.07	77.18	57.3	57.63	64.21	80.226	59.713	0.401189	0.086865	0.0481951	0.705351	3.5501e-09	1.9885e-09	0.281977	0.0286703	0.023534	0.265429	0.0424273	0.035111	NA	XP_710512.2|1.4e-74|hypothetical protein CAALFM_C500140CA [Candida albicans SC5314]	GO:0031224//intrinsic component of membrane;GO:0110165//cellular anatomical entity;GO:0016020//membrane;GO:0016021//integral component of membrane;
3636823	3636823	XM_716365.1	Known_gene	1	562357	562659	NC_032089.1	-	303	303	0.8	2.72	1.19	0	0.39	1.48	1.57	0.623	0.861007	0.426114	0.328249	6.32193	0.254905	0.228922	2.80206	0.0468235	0.0391224	-0.314636	0.797128	0.777206	NA	XP_721458.1|4.7e-48|hypothetical protein CAALFM_C102690CA [Candida albicans SC5314]	NA
3636982	3636982	XM_716300.1	Known_gene	1	359156	360895	NC_032095.1	+	1740	1740	39.19	47.98	43.12	10.35	8.94	7	43.43	8.763	2.2559	5.2019e-21	1.9811e-22	1.92085	5.71661e-96	9.95932e-97	2.42409	3.78451e-157	5.4858e-158	2.62293	3.83485e-154	5.50756e-155	K01426//amidase [EC:3.5.1.4]+ko00380//Tryptophan metabolism+ko00330//Arginine and proline metabolism+ko00360//Phenylalanine metabolism	XP_721393.1|0.0e+00|hypothetical protein CAALFM_C701670WA [Candida albicans SC5314]	NA
3646722	3646722	XM_706588.2	Known_gene	1	738908	739837	NC_032095.1	-	930	930	15.5	38.19	27.27	13.69	15	16.05	26.986	14.913	0.823802	0.0230062	0.0106633	0.179146	0.285954	0.258664	1.34823	8.26748e-29	3.14564e-29	0.764741	6.31289e-09	3.64974e-09	K19654//2-dehydropantolactone reductase [EC:1.1.1.358];K20032//palmitoyltransferase ZDHHC13/17 [EC:2.3.1.225]	XP_711680.2|3.4e-174|aldo-keto reductase superfamily protein [Candida albicans SC5314]	GO:0110165//cellular anatomical entity;GO:0005829//cytosol;GO:0005622//intracellular;GO:0005737//cytoplasm;GO:0016616//oxidoreductase activity, acting on the CH-OH group of donors, NAD or NADP as acceptor;GO:0016614//oxidoreductase activity, acting on CH-OH group of donors;GO:0016491//oxidoreductase activity;GO:0004032//alditol:NADP+ 1-oxidoreductase activity;GO:0003824//catalytic activity;GO:000…
3647898	3647898	XM_705407.1	Known_gene	1	11580	11948	NC_032094.1	+	369	369	67.32	76.98	105.1	82.04	119.8	104.38	83.133	102.073	-0.315734	0.252299	0.170815	-0.285292	0.0203098	0.0163216	-0.638072	1.25351e-08	7.59844e-09	0.00991736	0.928691	0.918788	K19950//protein transport protein SEC9	XP_710499.1|6.7e-65|hypothetical protein CAALFM_C600090WA [Candida albicans SC5314]	GO:0006996//organelle organization;GO:0044281//small molecule metabolic process;GO:0071704//organic substance metabolic process;GO:0009058//biosynthetic process;GO:0043933//protein-containing complex subunit organization;GO:0019318//hexose metabolic process;GO:0034553//mitochondrial respiratory chain complex II assembly;GO:0006094//gluconeogenesis;GO:0043648//dicarboxylic acid metabolic process;G…
3641807	LEA1	XM_711475.1	Known_gene	1	1269674	1270375	NC_032092.1	-	702	702	19.1	28.95	30.82	27.07	28.02	32.54	26.29	29.21	-0.165294	0.586532	0.488013	-0.503122	0.000677489	0.000489724	0.0471064	0.740926	0.721646	-0.0783474	0.511779	0.48023	K11092//U2 small nuclear ribonucleoprotein A'+ko03040//Spliceosome	XP_716568.1|4.5e-126|U2 snRNP complex subunit [Candida albicans SC5314]	GO:0016071//mRNA metabolic process;GO:0008380//RNA splicing;GO:0000375//RNA splicing, via transesterification reactions;GO:0008152//metabolic process;GO:0006725//cellular aromatic compound metabolic process;GO:0009987//cellular process;GO:0006139//nucleobase-containing compound metabolic process;GO:0000377//RNA splicing, via transesterification reactions with bulged adenosine as nucleophile;GO:00…
3635816	3635816	XM_717523.2	Known_gene	1	501159	502925	NC_032090.1	+	1767	1767	48.39	35.46	37.71	35.37	38.45	39.38	40.52	37.733	0.0928661	0.711406	0.627286	0.452183	3.59652e-12	1.82641e-12	-0.116791	0.0957307	0.082429	-0.062516	0.350366	0.319836	K03132//transcription initiation factor TFIID subunit 7+ko03022//Basal transcription factors	KGQ96926.1|0.0e+00|transcription initiation factor TFIID subunit 7 [Candida albicans P37005]	NA
3634919	3634919	XM_718336.1	Known_gene	1	1922753	1923817	NC_032089.1	+	1065	1065	33.53	40.42	43.42	7.03	9.13	11.09	39.123	9.083	2.06746	2.84658e-19	1.24979e-20	2.25386	5.1731e-59	1.24244e-59	2.14638	9.43034e-67	2.35326e-67	1.9691	6.94552e-64	1.68141e-64	K12562//amphiphysin+ko04144//Endocytosis	XP_723429.1|1.2e-199|hypothetical protein CAALFM_C108840WA [Candida albicans SC5314]	GO:0051666//actin cortical patch localization;GO:0006810//transport;GO:0016192//vesicle-mediated transport;GO:0051179//localization;GO:0010256//endomembrane system organization;GO:0006897//endocytosis;GO:0009987//cellular process;GO:0007009//plasma membrane organization;GO:0051234//establishment of localization;GO:0061024//membrane organization;GO:0016043//cellular component organization;GO:00718…
3648024	3648024	XM_705281.2	Known_gene	1	1383179	1385761	NC_032090.1	+	2583	2583	2.31	2.95	4.38	16.22	15.55	11.99	3.213	14.586	-2.16281	2.02168e-14	1.36168e-15	-2.81181	4.3065e-95	7.52418e-96	-2.39813	2.2686e-77	5.24484e-78	-1.45283	6.26052e-31	2.2134e-31	K19816//transcription activator MSS11+ko04011//MAPK signaling pathway - yeast	XP_710373.2|0.0e+00|hypothetical protein CAALFM_C206740WA [Candida albicans SC5314]	NA
3647465	3647465	XM_705843.1	Known_gene	1	1776123	1776815	NC_032091.1	-	693	693	NA	NA	NA	NA	NA	NA	NA	NA	NA	NA	NA	NA	NA	NA	NA	NA	NA	NA	NA	NA	K03841//fructose-1,6-bisphosphatase I [EC:3.1.3.11]+ko00010//Glycolysis / Gluconeogenesis+ko00030//Pentose phosphate pathway+ko01100//Metabolic pathways+ko01130//Biosynthesis of antibiotics+ko00051//Fructose and mannose metabolism+ko01110//Biosynthesis of secondary metabolites+ko00680//Methane metabolism+ko01200//Carbon metabolism	XP_710935.1|1.8e-127|hypothetical protein CAALFM_C307840CA [Candida albicans SC5314]	GO:0006000//fructose metabolic process;GO:1901135//carbohydrate derivative metabolic process;GO:0005986//sucrose biosynthetic process;GO:0019637//organophosphate metabolic process;GO:0006796//phosphate-containing compound metabolic process;GO:0006094//gluconeogenesis;GO:0005984//disaccharide metabolic process;GO:0005975//carbohydrate metabolic process;GO:0009058//biosynthetic process;GO:0044283//…
3641556	3641556	XM_711701.1	Known_gene	1	54415	63318	NC_032093.1	-	8904	8904	4.53	5	5.54	10.51	9.53	10.44	5.023	10.16	-1.02228	3.1641e-09	3.96762e-10	-1.21418	1.51684e-71	3.22114e-72	-0.930548	4.60462e-43	1.45551e-43	-0.914164	2.60557e-45	7.55798e-46	NA	XP_716794.1|0.0e+00|hypothetical protein CAALFM_C500330CA [Candida albicans SC5314]	GO:0006113//fermentation;GO:0044237//cellular metabolic process;GO:0008152//metabolic process;GO:0015980//energy derivation by oxidation of organic compounds;GO:0009987//cellular process;GO:0006091//generation of precursor metabolites and energy;GO:0055114//oxidation-reduction process;GO:0031224//intrinsic component of membrane;GO:0016020//membrane;GO:0016021//integral component of membrane;GO:01…
3644576	3644576	XM_708695.2	Known_gene	1	492588	496217	NC_032089.1	-	3630	3630	1.36	3.1	7.41	24.37	19.53	18.56	3.956	20.82	-2.30228	5.38275e-07	9.28307e-08	-4.16343	3.23927e-285	2.44402e-286	-2.65535	1.36497e-154	2.01728e-155	-1.32465	4.88336e-58	1.25135e-58	K20456//oxysterol-binding protein 1;K19983//exocyst complex component 1	XP_713788.2|0.0e+00|hypothetical protein CAALFM_C102370CA [Candida albicans SC5314]	NA
3643742	3643742	XM_709504.2	Known_gene	1	430841	432214	NC_032093.1	-	1374	1374	35.55	21.13	21.77	35.28	38.24	47.3	26.15	40.273	-0.614276	0.0357764	0.0174925	0.010999	0.933808	0.923698	-0.85579	6.94882e-22	2.99396e-22	-1.1195	6.82161e-41	2.07876e-41	K01106//inositol-1,4,5-trisphosphate 5-phosphatase [EC:3.1.3.56]+ko01100//Metabolic pathways+ko04070//Phosphatidylinositol signaling system+ko00562//Inositol phosphate metabolism;K20279//synaptojanin [EC:3.1.3.36]+ko01100//Metabolic pathways+ko04070//Phosphatidylinositol signaling system+ko00562//Inositol phosphate metabolism	XP_714597.2|1.8e-267|phosphoinositide 5-phosphatase [Candida albicans SC5314]	GO:0044281//small molecule metabolic process;GO:0046856//phosphatidylinositol dephosphorylation;GO:0071704//organic substance metabolic process;GO:0046174//polyol catabolic process;GO:0030258//lipid modification;GO:0046838//phosphorylated carbohydrate dephosphorylation;GO:1901616//organic hydroxy compound catabolic process;GO:0019637//organophosphate metabolic process;GO:0008152//metabolic proces…
3643479	ARP3	XM_709785.2	Known_gene	1	1488635	1489894	NC_032090.1	+	1260	1260	110.44	103.18	113	120.37	128.19	130.54	108.873	126.366	-0.226426	0.155487	0.0949262	-0.124213	0.00712981	0.00551242	-0.31312	1.78346e-11	9.84396e-12	-0.208169	3.34229e-06	2.16954e-06	K18584//actin-related protein 3+ko04138//Autophagy - yeast	XP_714878.1|5.8e-241|actin-related protein 3 [Candida albicans SC5314]	GO:0051641//cellular localization;GO:0097435//supramolecular fiber organization;GO:0050794//regulation of cellular process;GO:0042221//response to chemical;GO:1903047//mitotic cell cycle process;GO:1904670//actin filament polymerization involved in mitotic actomyosin contractile ring assembly;GO:0110053//regulation of actin filament organization;GO:0022607//cellular component assembly;GO:0032273/…
3646495	3646495	XM_706792.1	Known_gene	1	1867125	1867568	NC_032089.1	-	444	444	136.89	108.21	292.01	130.89	153.31	140.34	179.036	141.513	0.286966	0.46585	0.367148	0.0646622	0.559393	0.527808	-0.502618	2.39596e-09	1.42039e-09	1.05709	2.71878e-55	7.1163e-56	K17421//large subunit ribosomal protein L40	XP_711885.1|2.0e-79|mitochondrial 54S ribosomal protein YmL28 [Candida albicans SC5314]	GO:0009059//macromolecule biosynthetic process;GO:0006412//translation;GO:0044260//cellular macromolecule metabolic process;GO:0043604//amide biosynthetic process;GO:0043603//cellular amide metabolic process;GO:1901564//organonitrogen compound metabolic process;GO:0019538//protein metabolic process;GO:0034641//cellular nitrogen compound metabolic process;GO:0008152//metabolic process;GO:0009987//…
3637373	PGA16	XM_715879.1	Known_gene	1	789500	789823	NC_032090.1	+	324	324	NA	NA	NA	NA	NA	NA	NA	NA	NA	NA	NA	NA	NA	NA	NA	NA	NA	NA	NA	NA	K15165//mediator of RNA polymerase II transcription subunit 13, fungi type;K21641//glucose transport transcription regulator RGT1	XP_720972.1|8.6e-56|Pga16p [Candida albicans SC5314]	GO:0009405//pathogenesis;GO:0044419//interspecies interaction between organisms;GO:0031225//anchored component of membrane;GO:0110165//cellular anatomical entity;GO:0016020//membrane;GO:0071944//cell periphery;GO:0031224//intrinsic component of membrane;GO:0005886//plasma membrane;
3637759	3637759	XM_715445.2	Known_gene	1	489943	490926	NC_032093.1	+	984	984	136.43	108.8	91.46	125.15	146.53	129.5	112.23	133.726	-0.255351	0.331831	0.239395	0.124503	0.0202777	0.016289	-0.429518	4.08075e-17	1.95154e-17	-0.501739	3.31457e-20	1.41761e-20	NA	XP_720538.2|7.3e-183|hypothetical protein CAALFM_C502210WA [Candida albicans SC5314]	GO:0008104//protein localization;GO:0090150//establishment of protein localization to membrane;GO:0010256//endomembrane system organization;GO:0051179//localization;GO:0016043//cellular component organization;GO:0051234//establishment of localization;GO:0007029//endoplasmic reticulum organization;GO:0045184//establishment of protein localization;GO:0034613//cellular protein localization;GO:000998…
3645123	3645123	XM_708154.1	Known_gene	1	708144	709112	NC_032096.1	+	969	969	105.41	80.53	120.56	20.04	36.64	28.9	102.166	28.526	1.793	4.9411e-12	4.50311e-13	2.39506	2.70426e-176	3.01324e-177	1.13611	9.83019e-48	2.9384e-48	2.06061	1.26776e-166	1.68979e-167	NA	XP_713247.1|3.3e-188|hypothetical protein CAALFM_CR03120WA [Candida albicans SC5314]	NA
3640988	3640988	XM_712307.2	Known_gene	1	986837	987634	NC_032096.1	-	798	798	22.19	17.09	19.11	16.51	20.18	23.59	19.463	20.093	-0.05431	0.862945	0.808732	0.42657	0.0055827	0.0042828	-0.239774	0.125274	0.10885	-0.303848	0.0318024	0.0260322	NA	KHC45758.1|2.5e-149|hypothetical protein MGC_05787 [Candida albicans P37039]	NA
3637809	3637809	XM_715521.2	Known_gene	1	630777	631655	NC_032093.1	+	879	879	350.56	252.92	233.39	167.36	165.05	155.2	278.956	162.536	0.757143	0.00171676	0.000579296	1.06671	3.88423e-162	4.62562e-163	0.615778	4.64926e-47	1.4037e-47	0.588614	2.65753e-39	8.28872e-40	K12197//charged multivesicular body protein 1+ko04144//Endocytosis	XP_720614.2|3.5e-160|hypothetical protein CAALFM_C502830WA [Candida albicans SC5314]	GO:0042886//amide transport;GO:0051641//cellular localization;GO:0046907//intracellular transport;GO:0007034//vacuolar transport;GO:0015833//peptide transport;GO:0009987//cellular process;GO:0071985//multivesicular body sorting pathway;GO:0071705//nitrogen compound transport;GO:0051649//establishment of localization in cell;GO:0015031//protein transport;GO:0032509//endosome transport via multives…
3641928	3641928	XM_711347.1	Known_gene	1	1942195	1943244	NC_032096.1	-	1050	1050	611.69	656.2	708.76	226.97	243.95	171.77	658.883	214.23	1.58198	3.82741e-14	2.69886e-15	1.4303	0	0	1.42755	0	0	2.04482	0	0	K05275//pyridoxine 4-dehydrogenase [EC:1.1.1.65]+ko00750//Vitamin B6 metabolism+ko01100//Metabolic pathways	XP_716440.1|7.3e-197|pyridoxine 4-dehydrogenase [Candida albicans SC5314]	GO:0016616//oxidoreductase activity, acting on the CH-OH group of donors, NAD or NADP as acceptor;GO:0016614//oxidoreductase activity, acting on CH-OH group of donors;GO:0003824//catalytic activity;GO:0004033//aldo-keto reductase (NADP) activity;GO:0016491//oxidoreductase activity;
3645134	DPS1-1	XM_708147.1	Known_gene	1	715385	717121	NC_032096.1	+	1737	1737	146.56	243.19	245.81	155	128.53	147.21	211.853	143.58	0.535086	0.0496082	0.025196	-0.0807768	0.0169752	0.0135372	0.919979	1.9702e-191	2.49438e-192	0.739668	6.81458e-132	1.08883e-132	K22503//aspartyl-tRNA synthetase [EC:6.1.1.12]+ko00970//Aminoacyl-tRNA biosynthesis	XP_713240.1|0.0e+00|aspartate--tRNA ligase [Candida albicans SC5314]	GO:0006399//tRNA metabolic process;GO:1901564//organonitrogen compound metabolic process;GO:0006139//nucleobase-containing compound metabolic process;GO:0006725//cellular aromatic compound metabolic process;GO:1901576//organic substance biosynthetic process;GO:0034645//cellular macromolecule biosynthetic process;GO:0043170//macromolecule metabolic process;GO:0009058//biosynthetic process;GO:00346…
3639513	3639513	XM_713746.2	Known_gene	1	1411658	1412701	NC_032089.1	+	1044	1044	540.15	412.29	420.71	330.29	317.57	259.28	457.716	302.38	0.574359	0.0144483	0.00626661	0.709627	2.24373e-152	2.79532e-153	0.376585	2.26959e-38	7.61326e-39	0.698315	3.03067e-115	5.27666e-116	K18749//protein LSM14	XP_718839.1|9.1e-200|hypothetical protein CAALFM_C106600WA [Candida albicans SC5314]	GO:0031326//regulation of cellular biosynthetic process;GO:0044085//cellular component biogenesis;GO:0050794//regulation of cellular process;GO:0034249//negative regulation of cellular amide metabolic process;GO:0017148//negative regulation of translation;GO:0034063//stress granule assembly;GO:0032269//negative regulation of cellular protein metabolic process;GO:0048519//negative regulation of bi…
3635706	3635706	XM_717643.1	Known_gene	1	248784	249194	NC_032092.1	-	411	411	13.56	8.62	6.12	14.98	31.12	26.32	9.433	24.14	-1.29225	0.00262423	0.000921294	-0.14368	0.585672	0.555042	-1.85208	1.31637e-13	6.83988e-14	-2.10456	8.34582e-14	4.14788e-14	NA	XP_722736.1|7.2e-76|hypothetical protein CAALFM_C401230CA [Candida albicans SC5314]	NA
3638363	3638363	XM_714933.2	Known_gene	1	698460	699125	NC_032091.1	-	666	666	67.09	61.22	69.13	82.12	88.55	85.43	65.813	85.366	-0.389629	0.024545	0.0114418	-0.291636	0.00047782	0.000341732	-0.532489	3.57796e-10	2.05606e-10	-0.305431	0.000174769	0.000123724	K19589//release factor glutamine methyltransferase [EC:2.1.1.297]	KHC87485.1|5.7e-123|hypothetical protein I503_02844 [Candida albicans SC5314]	GO:0008152//metabolic process;GO:0032259//methylation;GO:0034708//methyltransferase complex;GO:0035657//eRF1 methyltransferase complex;GO:0032991//protein-containing complex;GO:0005622//intracellular;GO:1902494//catalytic complex;GO:1990234//transferase complex;GO:0008757//S-adenosylmethionine-dependent methyltransferase activity;GO:0140096//catalytic activity, acting on a protein;GO:0097159//org…
3643897	3643897	XM_709387.2	Known_gene	1	1699140	1700204	NC_032090.1	+	1065	1065	6.88	7.29	7.72	17.5	21.81	16.71	7.296	18.673	-1.34885	1.14351e-08	1.54991e-09	-1.34687	5.46416e-16	2.51002e-16	-1.581	1.23747e-24	5.08612e-25	-1.11404	9.24707e-12	4.8685e-12	K01247//DNA-3-methyladenine glycosylase II [EC:3.2.2.21]+ko03410//Base excision repair	XP_714480.2|3.9e-198|hypothetical protein CAALFM_C208420WA [Candida albicans SC5314]	GO:0046483//heterocycle metabolic process;GO:0006307//DNA dealkylation involved in DNA repair;GO:0009987//cellular process;GO:0006304//DNA modification;GO:0035510//DNA dealkylation;GO:0006284//base-excision repair;GO:0033554//cellular response to stress;GO:0044238//primary metabolic process;GO:0006725//cellular aromatic compound metabolic process;GO:0034641//cellular nitrogen compound metabolic p…
3646499	TCP1	XM_706796.1	Known_gene	1	1872858	1874522	NC_032089.1	+	1665	1665	77.42	95.34	106.62	98.91	93.7	89.79	93.126	94.133	-0.0333474	0.897419	0.853988	-0.35341	8.74122e-15	4.1333e-15	0.0250326	0.593112	0.566004	0.247851	2.01654e-08	1.18902e-08	K09493//T-complex protein 1 subunit alpha	XP_007376933.1|3.9e-285|hypothetical protein SPAPADRAFT_62812 [Spathaspora passalidarum NRRL Y-27907]	GO:0009987//cellular process;GO:0006457//protein folding;GO:0110165//cellular anatomical entity;GO:0005737//cytoplasm;GO:0005622//intracellular;GO:0000166//nucleotide binding;GO:0035639//purine ribonucleoside triphosphate binding;GO:0032553//ribonucleotide binding;GO:1901363//heterocyclic compound binding;GO:0043168//anion binding;GO:0097159//organic cyclic compound binding;GO:0005488//binding;GO…
3644542	KRR1	XM_708702.2	Known_gene	1	2504035	2505111	NC_032089.1	+	1077	1077	185.26	186.01	227.66	275.09	213.18	233.06	199.643	240.443	-0.28835	0.192971	0.123138	-0.570352	8.96111e-57	2.21192e-57	-0.196692	4.0306e-07	2.58644e-07	-0.0338206	0.29874	0.269324	K06961//ribosomal RNA assembly protein	XP_713795.1|1.1e-205|ribosome biosynthesis protein [Candida albicans SC5314]	GO:0034470//ncRNA processing;GO:0022613//ribonucleoprotein complex biogenesis;GO:0006139//nucleobase-containing compound metabolic process;GO:0090304//nucleic acid metabolic process;GO:0009987//cellular process;GO:1901360//organic cyclic compound metabolic process;GO:0043170//macromolecule metabolic process;GO:0044238//primary metabolic process;GO:0034641//cellular nitrogen compound metabolic pro…
3639267	PEP3	XM_714053.2	Known_gene	1	630448	632880	NC_032094.1	+	2433	2433	37.19	30.89	29.1	26.15	29.06	31.79	32.393	29	0.153865	0.508027	0.408738	0.508104	6.2442e-16	2.87354e-16	0.0881052	0.186141	0.164966	-0.127554	0.0477542	0.0397262	K20181//vacuolar protein sorting-associated protein 18+ko04138//Autophagy - yeast	XP_719146.2|0.0e+00|tethering complex subunit [Candida albicans SC5314]	GO:0009987//cellular process;GO:0051049//regulation of transport;GO:0033036//macromolecule localization;GO:0034613//cellular protein localization;GO:0051179//localization;GO:0022406//membrane docking;GO:0032879//regulation of localization;GO:0051649//establishment of localization in cell;GO:0140352//export from cell;GO:0050794//regulation of cellular process;GO:0050789//regulation of biological p…
3640280	ALS1	BGI_novel_T000183,BGI_novel_T000181,BGI_novel_T000179,XM_712984.2,BGI_novel_T000182,BGI_novel_T000178,BGI_novel_T000180	Known_gene	7	791291	795073	NC_032094.1	+	3783	3783	4174.79	1859.23	1639.54	4090.12	3455.19	3316.09	2557.85	3620.47	-0.486895	0.234488	0.156572	0.0295605	3.5566e-09	1.99274e-09	-0.89406	0	0	-1.01619	0	0	K22493//agglutinin-like protein;K22493//agglutinin-like protein;K22493//agglutinin-like protein;K22493//agglutinin-like protein;K22493//agglutinin-like protein;K22493//agglutinin-like protein;K22493//agglutinin-like protein	XP_718077.1|0.0e+00|Als1p [Candida albicans SC5314]	GO:0048522//positive regulation of cellular process;GO:0046916//cellular transition metal ion homeostasis;GO:0043207//response to external biotic stimulus;GO:0044406//adhesion of symbiont to host;GO:0050801//ion homeostasis;GO:0030448//hyphal growth;GO:0098743//cell aggregation;GO:0044409//entry into host;GO:0055082//cellular chemical homeostasis;GO:0052031//modulation by symbiont of host defense…
3640224	MRP20	XM_713080.2	Known_gene	1	323650	324531	NC_032089.1	+	882	882	83.05	96.19	194.72	77.73	104.06	90.53	124.653	90.773	0.414268	0.242445	0.162652	0.0955087	0.208043	0.184099	-0.113457	0.0711274	0.0604494	1.10493	4.23098e-96	8.17716e-97	K02892//large subunit ribosomal protein L23+ko03010//Ribosome	XP_718173.2|3.5e-168|mitochondrial 54S ribosomal protein YmL41 [Candida albicans SC5314]	GO:0034645//cellular macromolecule biosynthetic process;GO:0009058//biosynthetic process;GO:0032543//mitochondrial translation;GO:0043043//peptide biosynthetic process;GO:0044267//cellular protein metabolic process;GO:1901576//organic substance biosynthetic process;GO:0043170//macromolecule metabolic process;GO:0034641//cellular nitrogen compound metabolic process;GO:0019538//protein metabolic pr…
3639256	MDL2	XM_714068.2	Known_gene	1	659079	661430	NC_032094.1	-	2352	2352	44.3	35.29	43.9	64.42	65.32	59.07	41.163	62.936	-0.623904	0.000725644	0.000224584	-0.540202	8.38441e-29	2.94376e-29	-0.888265	4.18262e-68	1.03467e-68	-0.428205	6.96099e-18	3.14764e-18	K01509//adenosinetriphosphatase [EC:3.6.1.3]+ko00230//Purine metabolism;K02021//putative ABC transport system ATP-binding protein	XP_719161.2|0.0e+00|Mdl2p [Candida albicans SC5314]	GO:1990542//mitochondrial transmembrane transport;GO:0006810//transport;GO:0006839//mitochondrial transport;GO:0071705//nitrogen compound transport;GO:0035672//oligopeptide transmembrane transport;GO:0071702//organic substance transport;GO:0042886//amide transport;GO:0055085//transmembrane transport;GO:0051179//localization;GO:0015833//peptide transport;GO:0009987//cellular process;GO:0006857//ol…
3641388	DBF4	XM_711895.1	Known_gene	1	639193	640713	NC_032095.1	-	1521	1521	48.09	43.9	52.61	75.12	80.04	72.95	48.2	76.036	-0.669468	4.41781e-05	1.05137e-05	-0.64346	7.63856e-29	2.68062e-29	-0.8665	2.19725e-50	6.39934e-51	-0.471571	1.09279e-16	5.0834e-17	K02309//regulatory subunit for Cdc7p protein kinase+ko04113//Meiosis - yeast+ko04111//Cell cycle - yeast	XP_716988.1|5.2e-297|protein serine/threonine kinase activating protein [Candida albicans SC5314]	GO:0050794//regulation of cellular process;GO:2000105//positive regulation of DNA-dependent DNA replication;GO:0009891//positive regulation of biosynthetic process;GO:0050789//regulation of biological process;GO:0090329//regulation of DNA-dependent DNA replication;GO:0051726//regulation of cell cycle;GO:0009893//positive regulation of metabolic process;GO:0045740//positive regulation of DNA repli…
3639324	CCT8	XM_713965.1	Known_gene	1	17338	18960	NC_032089.1	+	1623	1623	267.13	292.65	279.21	234.17	286.43	255.68	279.663	258.76	0.102777	0.612012	0.514972	0.189986	1.0975e-11	5.67762e-12	0.0309937	0.245235	0.220568	0.127011	4.16506e-06	2.7161e-06	K09500//T-complex protein 1 subunit theta	XP_719058.1|9.2e-300|chaperonin-containing T-complex subunit [Candida albicans SC5314]	GO:0036180//filamentous growth of a population of unicellular organisms in response to biotic stimulus;GO:0042221//response to chemical;GO:0007154//cell communication;GO:0042493//response to drug;GO:0071496//cellular response to external stimulus;GO:0051716//cellular response to stimulus;GO:0036171//filamentous growth of a population of unicellular organisms in response to chemical stimulus;GO:00…
3636911	3636911	XM_716453.2	Known_gene	1	727114	730086	NC_032089.1	-	2973	2973	6.81	5.19	7.02	12.89	12.49	15.04	6.34	13.473	-1.08946	7.44306e-08	1.12395e-08	-0.920526	3.78255e-19	1.60336e-19	-1.26697	1.51883e-30	5.64464e-31	-1.09926	3.72761e-29	1.35454e-29	K09448//transcriptional enhancer factor+ko04011//MAPK signaling pathway - yeast+ko04392//Hippo signaling pathway - multiple species	XP_721546.2|0.0e+00|hypothetical protein CAALFM_C103460CA [Candida albicans SC5314]	GO:0003700//DNA-binding transcription factor activity;GO:0140110//transcription regulator activity;
3634869	ADE12	XM_718420.1	Known_gene	1	2122166	2123452	NC_032089.1	+	1287	1287	344.25	815.39	665.44	426.83	351.42	348.58	608.36	375.61	0.660954	0.0585923	0.0304216	-0.310205	1.02606e-35	3.2248e-36	1.21429	0	0	0.932819	0	0	K01939//adenylosuccinate synthase [EC:6.3.4.4]+ko00250//Alanine, aspartate and glutamate metabolism+ko00230//Purine metabolism+ko01100//Metabolic pathways	XP_723513.1|1.8e-250|adenylosuccinate synthase [Candida albicans SC5314]	GO:0019693//ribose phosphate metabolic process;GO:0046040//IMP metabolic process;GO:0051716//cellular response to stimulus;GO:0009161//ribonucleoside monophosphate metabolic process;GO:0044237//cellular metabolic process;GO:0044238//primary metabolic process;GO:0071248//cellular response to metal ion;GO:1901293//nucleoside phosphate biosynthetic process;GO:0044208//'de novo' AMP biosynthetic proc…
3636508	3636508	XM_716755.2	Known_gene	1	991257	992165	NC_032093.1	+	909	909	50.24	43.56	46.04	28.46	40.42	35.87	46.613	34.916	0.403376	0.0715699	0.0381952	0.819901	9.07454e-17	4.06722e-17	0.107935	0.267367	0.241812	0.36011	0.000220504	0.00015669	NA	XP_721848.2|1.0e-167|hypothetical protein CAALFM_C504550WA [Candida albicans SC5314]	GO:0031224//intrinsic component of membrane;GO:0043227//membrane-bounded organelle;GO:0031301//integral component of organelle membrane;GO:0072546//ER membrane protein complex;GO:0016021//integral component of membrane;GO:0031090//organelle membrane;GO:0016020//membrane;GO:0098796//membrane protein complex;GO:0012505//endomembrane system;GO:0031227//intrinsic component of endoplasmic reticulum me…
3638398	USO5	XM_714908.2	Known_gene	1	656093	657952	NC_032091.1	+	1860	1860	6.63	7.59	8.21	8.7	8.43	8.91	7.476	8.68	-0.226767	0.340865	0.247443	-0.392007	0.00854652	0.0066348	-0.151433	0.308234	0.281652	-0.118043	0.407518	0.375878	K20361//intracellular protein transport protein USO1	XP_720001.2|0.0e+00|Uso5p [Candida albicans SC5314]	GO:0051726//regulation of cell cycle;GO:0090224//regulation of spindle organization;GO:0022414//reproductive process;GO:0036267//invasive filamentous growth;GO:0065007//biological regulation;GO:0033043//regulation of organelle organization;GO:0060236//regulation of mitotic spindle organization;GO:0070783//growth of unicellular organism as a thread of attached cells;GO:0048284//organelle fusion;GO…
3644115	TFB3	XM_019475407.1	Known_gene	1	158181	159323	NC_032093.1	-	1143	1083	9.7	7.01	12.51	23.25	19.17	17.28	9.74	19.9	-1.03983	0.000304894	8.72647e-05	-1.26117	2.64862e-19	1.11874e-19	-1.45136	9.77689e-20	4.4049e-20	-0.466021	0.00110413	0.000819542	K10842//CDK-activating kinase assembly factor MAT1+ko03420//Nucleotide excision repair+ko03022//Basal transcription factors	XP_019330952.1|1.1e-208|TFIIH/NER complex subunit [Candida albicans SC5314]	GO:0009987//cellular process;GO:0051246//regulation of protein metabolic process;GO:0006281//DNA repair;GO:1903506//regulation of nucleic acid-templated transcription;GO:0044237//cellular metabolic process;GO:0033554//cellular response to stress;GO:0080090//regulation of primary metabolic process;GO:0006725//cellular aromatic compound metabolic process;GO:0051252//regulation of RNA metabolic proc…
3637984	3637984	XM_715300.1	Known_gene	1	30551	31618	NC_032095.1	+	1068	1068	19.49	19.97	19.68	16.75	18.21	23.56	19.713	19.506	0.00777393	0.98076	0.969343	0.218573	0.110315	0.0946056	0.133103	0.311736	0.285112	-0.259609	0.0289442	0.0236106	NA	XP_720393.1|1.9e-200|hypothetical protein CAALFM_C700220WA [Candida albicans SC5314]	GO:1901363//heterocyclic compound binding;GO:0005488//binding;GO:0097159//organic cyclic compound binding;GO:0003676//nucleic acid binding;
3640378	3640378	XM_712842.1	Known_gene	1	250793	251212	NC_032096.1	-	420	420	45.15	50.32	87.99	43.09	59.34	44.53	61.153	48.986	0.280095	0.419924	0.322433	0.0673729	0.741275	0.717076	-0.237873	0.0844961	0.072389	0.982562	1.30288e-14	6.34944e-15	K18185//cytochrome c oxidase assembly protein subunit 23	XP_717935.1|1.1e-79|hypothetical protein CAALFM_CR01100CA [Candida albicans SC5314]	GO:0043229//intracellular organelle;GO:0031974//membrane-enclosed lumen;GO:0031970//organelle envelope lumen;GO:0031975//envelope;GO:0043233//organelle lumen;GO:0043231//intracellular membrane-bounded organelle;GO:0043227//membrane-bounded organelle;GO:0031967//organelle envelope;GO:0005622//intracellular;GO:0005737//cytoplasm;GO:0043226//organelle;GO:0005740//mitochondrial envelope;GO:0005739//m…
3637414	HSP78	XM_715912.2	Known_gene	1	707074	709512	NC_032090.1	-	2439	2439	153.18	106.05	133.66	45.33	42.13	39.76	130.963	42.406	1.59113	1.03593e-14	6.82233e-16	1.75669	0	0	1.33182	3.44323e-218	4.00322e-219	1.74918	0	0	K03695//ATP-dependent Clp protease ATP-binding subunit ClpB+ko04213//Longevity regulating pathway - multiple species;K01509//adenosinetriphosphatase [EC:3.6.1.3]+ko00230//Purine metabolism	XP_721005.2|0.0e+00|chaperone ATPase [Candida albicans SC5314]	GO:0043229//intracellular organelle;GO:0005759//mitochondrial matrix;GO:0070013//intracellular organelle lumen;GO:0031974//membrane-enclosed lumen;GO:0005737//cytoplasm;GO:0043227//membrane-bounded organelle;GO:0005739//mitochondrion;GO:0005622//intracellular;GO:0043226//organelle;GO:0043233//organelle lumen;GO:0043231//intracellular membrane-bounded organelle;GO:0110165//cellular anatomical enti…
3647092	3647092	XM_706206.1	Known_gene	1	2052941	2054116	NC_032096.1	+	1176	1176	15.44	17.39	22.98	15.63	15.75	17.1	18.603	16.16	0.181116	0.480107	0.38062	-0.017645	0.87886	0.864368	0.142906	0.284579	0.258518	0.426382	0.000370211	0.000266648	K19898//alpha-agglutinin	XP_711298.1|1.8e-220|hypothetical protein CAALFM_CR09660WA [Candida albicans SC5314]	GO:0051726//regulation of cell cycle;GO:0050794//regulation of cellular process;GO:0065007//biological regulation;GO:0050789//regulation of biological process;GO:0110165//cellular anatomical entity;GO:0005622//intracellular;GO:0043227//membrane-bounded organelle;GO:0043231//intracellular membrane-bounded organelle;GO:0043226//organelle;GO:0043229//intracellular organelle;GO:0005634//nucleus;
3642023	3642023	XM_711215.2	Known_gene	1	2672727	2674139	NC_032089.1	-	1413	1413	16.62	8.29	8.8	10.28	14.78	14.09	11.236	13.05	-0.211642	0.596704	0.499056	0.69308	1.29362e-07	7.68112e-08	-0.834202	3.52343e-09	2.10054e-09	-0.679096	1.51852e-06	9.68744e-07	K07050//misacylated tRNA(Ala) deacylase [EC:3.1.1.-]	XP_716308.2|4.6e-271|putative alanine--tRNA ligase [Candida albicans SC5314]	GO:0043038//amino acid activation;GO:0043039//tRNA aminoacylation;GO:0006419//alanyl-tRNA aminoacylation;GO:0043170//macromolecule metabolic process;GO:1901566//organonitrogen compound biosynthetic process;GO:0006418//tRNA aminoacylation for protein translation;GO:0034660//ncRNA metabolic process;GO:0006520//cellular amino acid metabolic process;GO:0044260//cellular macromolecule metabolic proces…
3638043	PMR1	XM_715287.1	Known_gene	1	48461	51214	NC_032095.1	-	2754	2754	19.93	25.73	31.71	39.37	46.45	50.39	25.79	45.403	-0.819289	0.000206485	5.7004e-05	-0.982155	3.21186e-57	7.87986e-58	-0.852227	1.17903e-53	3.29616e-54	-0.6682	2.0113e-38	6.3402e-39	K01537//Ca2+-transporting ATPase [EC:3.6.3.8]	XP_720380.1|0.0e+00|Ca(2+)/Mn(2+)-transporting P-type ATPase [Candida albicans SC5314]	GO:0071555//cell wall organization;GO:0055082//cellular chemical homeostasis;GO:0071852//fungal-type cell wall organization or biogenesis;GO:1901566//organonitrogen compound biosynthetic process;GO:0055085//transmembrane transport;GO:0051234//establishment of localization;GO:0051716//cellular response to stimulus;GO:0070588//calcium ion transmembrane transport;GO:0030447//filamentous growth;GO:00…
3635622	3635622	XM_717618.1	Known_gene	1	307183	307857	NC_032092.1	-	675	675	30.53	41.15	51.93	40.02	42.74	51.77	41.203	44.843	-0.139278	0.643814	0.549174	-0.390494	0.00133594	0.00098304	-0.0546945	0.64151	0.616256	0.00445191	0.963695	0.958236	NA	XP_722711.1|1.5e-123|hypothetical protein CAALFM_C401460CA [Candida albicans SC5314]	NA
3640525	RPT2	XM_712719.2	Known_gene	1	39195	40520	NC_032091.1	+	1326	1326	963.82	655.56	531.56	502.01	599.01	543.77	716.98	548.263	0.377261	0.212006	0.137607	0.941048	0	0	0.130148	2.10666e-11	1.16666e-11	-0.032764	0.086098	0.0733024	K03062//26S proteasome regulatory subunit T2+ko03050//Proteasome	XP_717812.2|2.7e-249|proteasome regulatory particle base subunit [Candida albicans SC5314]	GO:0008152//metabolic process;GO:0030163//protein catabolic process;GO:0071704//organic substance metabolic process;GO:0044238//primary metabolic process;GO:0009057//macromolecule catabolic process;GO:0019538//protein metabolic process;GO:0043170//macromolecule metabolic process;GO:1901564//organonitrogen compound metabolic process;GO:1901575//organic substance catabolic process;GO:0009056//catab…
3636602	PPT1	XM_716657.2	Known_gene	1	369832	371523	NC_032091.1	-	1692	1692	9.14	14.23	22.77	15.86	17.45	15.22	15.38	16.176	-0.0990382	0.807179	0.741	-0.795127	9.58138e-11	5.0939e-11	-0.294291	0.00687921	0.00541616	0.581166	5.52777e-09	3.18938e-09	K04460//serine/threonine-protein phosphatase 5 [EC:3.1.3.16]	XP_721750.2|0.0e+00|protein serine/threonine phosphatase [Candida albicans SC5314]	GO:0005634//nucleus;GO:0043231//intracellular membrane-bounded organelle;GO:0005829//cytosol;GO:0043226//organelle;GO:0043229//intracellular organelle;GO:0005622//intracellular;GO:0043227//membrane-bounded organelle;GO:0005737//cytoplasm;GO:0110165//cellular anatomical entity;GO:0042578//phosphoric ester hydrolase activity;GO:0004722//protein serine/threonine phosphatase activity;GO:0003824//cata…
3642614	SGE1	XM_710612.2	Known_gene	1	286734	288617	NC_032093.1	+	1884	1884	176.11	158.02	148.31	183.1	158.79	159.62	160.813	167.17	-0.0674263	0.785539	0.713204	-0.056155	0.0578558	0.0482678	-0.00701289	0.834847	0.820782	-0.106026	0.000890429	0.000656324	K22134//MFS transporter, DHA2 family, glioxin efflux transporter;K10866//DNA repair protein RAD50 [EC:3.6.-.-]+ko03440//Homologous recombination+ko03450//Non-homologous end-joining	XP_715705.2|0.0e+00|Sge1p [Candida albicans SC5314]	GO:0051234//establishment of localization;GO:0051179//localization;GO:0006810//transport;GO:0055085//transmembrane transport;GO:0009987//cellular process;GO:0071944//cell periphery;GO:0005887//integral component of plasma membrane;GO:0031226//intrinsic component of plasma membrane;GO:0005886//plasma membrane;GO:0016020//membrane;GO:0031224//intrinsic component of membrane;GO:0016021//integral com…
3639823	ARC35	XM_713367.2	Known_gene	1	1273457	1274497	NC_032089.1	-	1041	1041	69.29	52.75	63.64	63.77	72.9	72.22	61.893	69.63	-0.181625	0.388606	0.292292	0.119769	0.103215	0.0882592	-0.466748	4.19671e-11	2.34722e-11	-0.182465	0.00638384	0.00497242	K05758//actin related protein 2/3 complex, subunit 2+ko04144//Endocytosis	XP_718460.1|2.1e-196|Arc35p [Candida albicans SC5314]	GO:0051130//positive regulation of cellular component organization;GO:0009987//cellular process;GO:0030833//regulation of actin filament polymerization;GO:0022607//cellular component assembly;GO:0035690//cellular response to drug;GO:0016043//cellular component organization;GO:0071840//cellular component organization or biogenesis;GO:0030029//actin filament-based process;GO:0050789//regulation of …
3635629	HAP3	XM_019475361.1,BGI_novel_T000122	Known_gene	2	287625	288733	NC_032092.1	+	1109	1003	82.04	64.03	68.42	343.5	283.86	256.56	71.496	294.64	-2.03546	2.59182e-20	1.07252e-21	-2.06591	0	0	-2.14836	0	0	-1.90681	0	0	K08065//nuclear transcription Y subunit beta;K08065//nuclear transcription Y subunit beta	XP_019330906.1|1.1e-189|Hap3p [Candida albicans SC5314]	GO:0019222//regulation of metabolic process;GO:0070887//cellular response to chemical stimulus;GO:0050896//response to stimulus;GO:0006950//response to stress;GO:2000112//regulation of cellular macromolecule biosynthetic process;GO:0031326//regulation of cellular biosynthetic process;GO:0043620//regulation of DNA-templated transcription in response to stress;GO:0034599//cellular response to oxida…
3642258	3642258	XM_710994.1	Known_gene	1	1455629	1456801	NC_032091.1	-	1173	1173	326.52	455.03	412.13	396.56	388.12	383.54	397.893	389.406	0.0183132	0.9483	0.923066	-0.280368	3.03056e-25	1.13621e-25	0.229459	1.30419e-19	5.89334e-20	0.103722	0.00018738	0.000132777	K14765//U3 small nucleolar ribonucleoprotein protein LCP5	XP_716087.1|1.5e-214|hypothetical protein CAALFM_C306370CA [Candida albicans SC5314]	GO:0010467//gene expression;GO:0044085//cellular component biogenesis;GO:0046483//heterocycle metabolic process;GO:0016072//rRNA metabolic process;GO:1901360//organic cyclic compound metabolic process;GO:0071704//organic substance metabolic process;GO:0006139//nucleobase-containing compound metabolic process;GO:0030490//maturation of SSU-rRNA;GO:0043170//macromolecule metabolic process;GO:0000462…
3636829	3636829	XM_716387.1	Known_gene	1	610205	611635	NC_032089.1	-	1431	1431	25.21	19.09	19.98	21.07	24.83	26.5	21.426	24.133	-0.176567	0.478539	0.379131	0.258806	0.00984922	0.00769696	-0.379267	0.000163714	0.000117508	-0.407436	2.76613e-05	1.88265e-05	K08329//autophagy-related protein 17+ko04138//Autophagy - yeast	XP_721480.1|6.7e-270|protein kinase regulatory subunit [Candida albicans SC5314]	GO:0019222//regulation of metabolic process;GO:0001934//positive regulation of protein phosphorylation;GO:0009987//cellular process;GO:0060255//regulation of macromolecule metabolic process;GO:0016237//lysosomal microautophagy;GO:0032147//activation of protein kinase activity;GO:1903008//organelle disassembly;GO:0061919//process utilizing autophagic mechanism;GO:0007005//mitochondrion organizatio…
3646284	ATM1	XM_706997.2,BGI_novel_T000213	Known_gene	2	926798	932309	NC_032094.1	-	5512	5394	122.62	105.36	122.79	65.79	66.66	60.65	116.923	64.366	0.840254	2.97597e-07	4.89478e-08	0.898254	3.21044e-302	2.34206e-303	0.660434	5.12132e-154	7.58588e-155	1.01761	0	0	K05663//mitochondrial ABC transporter ATM+ko02010//ABC transporters;K05663//mitochondrial ABC transporter ATM+ko02010//ABC transporters	XP_712090.2|0.0e+00|ATP-binding cassette Fe/S cluster precursor transporter [Candida albicans SC5314]	GO:0055076//transition metal ion homeostasis;GO:0042592//homeostatic process;GO:0006811//ion transport;GO:0006875//cellular metal ion homeostasis;GO:0098771//inorganic ion homeostasis;GO:0006879//cellular iron ion homeostasis;GO:0006873//cellular ion homeostasis;GO:0055065//metal ion homeostasis;GO:0065008//regulation of biological quality;GO:0030003//cellular cation homeostasis;GO:0065007//biolo…
3638949	3638949	XM_714337.1	Known_gene	1	2281329	2282324	NC_032096.1	-	996	996	494.51	290.65	243.64	402.06	427.32	435.36	342.933	421.58	-0.294666	0.387118	0.290677	0.298589	1.31555e-27	4.7153e-28	-0.556034	7.50749e-76	1.75697e-76	-0.837458	1.63845e-158	2.30672e-159	K13989//Derlin-2/3+ko04141//Protein processing in endoplasmic reticulum	XP_719430.1|4.2e-194|hypothetical protein CAALFM_CR10810CA [Candida albicans SC5314]	GO:1901698//response to nitrogen compound;GO:0019941//modification-dependent protein catabolic process;GO:0050789//regulation of biological process;GO:0007165//signal transduction;GO:0008152//metabolic process;GO:0030433//ubiquitin-dependent ERAD pathway;GO:0006950//response to stress;GO:0051716//cellular response to stimulus;GO:0050794//regulation of cellular process;GO:0043632//modification-dep…
3646701	3646701	XM_706616.1	Known_gene	1	1210658	1211560	NC_032096.1	-	903	903	71.38	61.74	68.63	102.46	106.36	115.57	67.25	108.13	-0.693746	2.29139e-05	5.21689e-06	-0.521469	9.05368e-16	4.18906e-16	-0.784678	8.20883e-32	3.00146e-32	-0.751856	1.93794e-32	6.6643e-33	K20362//protein transport protein YIF1	XP_711708.1|1.7e-170|hypothetical protein CAALFM_CR05700CA [Candida albicans SC5314]	GO:0006810//transport;GO:0016192//vesicle-mediated transport;GO:0006888//endoplasmic reticulum to Golgi vesicle-mediated transport;GO:0051649//establishment of localization in cell;GO:0051234//establishment of localization;GO:0051641//cellular localization;GO:0009987//cellular process;GO:0046907//intracellular transport;GO:0051179//localization;GO:0048193//Golgi vesicle transport;GO:0005794//Golg…
3640297	3640297	XM_712975.2	Known_gene	1	769693	771234	NC_032094.1	-	1542	1542	60.63	54	64.21	53.36	51.72	58.7	59.613	54.593	0.111892	0.554199	0.454475	0.184273	0.0026611	0.00199804	0.0622371	0.335476	0.307664	0.129437	0.0316928	0.0259266	K20039//phenacrylate decarboxylase [EC:4.1.1.102]	XP_718068.2|7.9e-309|putative phenylacrylic acid decarboxylase [Candida albicans SC5314]	GO:1901360//organic cyclic compound metabolic process;GO:0071704//organic substance metabolic process;GO:0042537//benzene-containing compound metabolic process;GO:0019752//carboxylic acid metabolic process;GO:0043436//oxoacid metabolic process;GO:0072329//monocarboxylic acid catabolic process;GO:0044248//cellular catabolic process;GO:0044281//small molecule metabolic process;GO:0008152//metabolic…
3638514	FESUR1	XM_714797.1	Known_gene	1	1616538	1617209	NC_032091.1	+	672	672	239.86	134.45	199.78	255.52	258.98	312.93	191.363	275.81	-0.535968	0.0434512	0.0217292	-0.0912436	0.0360447	0.029561	-0.945771	1.99226e-72	4.77544e-73	-0.647428	3.48656e-47	9.89852e-48	K03940//NADH dehydrogenase (ubiquinone) Fe-S protein 7 [EC:7.1.1.2 1.6.99.3]+ko01100//Metabolic pathways+ko00190//Oxidative phosphorylation	XP_719890.1|3.6e-125|Fesur1p [Candida albicans SC5314]	GO:0034622//cellular protein-containing complex assembly;GO:0006812//cation transport;GO:0022607//cellular component assembly;GO:0051234//establishment of localization;GO:0044237//cellular metabolic process;GO:0015672//monovalent inorganic cation transport;GO:0098660//inorganic ion transmembrane transport;GO:0098662//inorganic cation transmembrane transport;GO:0071840//cellular component organiza…
3646554	SCP1	XM_706732.2	Known_gene	1	1301184	1301768	NC_032090.1	-	585	585	30.58	17.3	22.42	35.49	45.6	45.48	23.433	42.19	-0.844827	0.00307594	0.00109829	-0.214824	0.117147	0.100718	-1.39826	5.88199e-21	2.57748e-21	-1.02045	1.88554e-13	9.44654e-14	K20526//transgelin	XP_711824.2|2.3e-107|Scp1p [Candida albicans SC5314]	NA
3641898	PHO88	XM_711368.1	Known_gene	1	1976705	1977280	NC_032096.1	-	576	576	523.08	366.76	362.21	535.48	598.72	594.23	417.35	576.143	-0.470655	0.047829	0.0241889	-0.0338011	0.232503	0.207526	-0.707045	3.04558e-83	6.76174e-84	-0.714195	1.33105e-86	2.72108e-87	NA	XP_716461.1|1.4e-101|Pho88p [Candida albicans SC5314]	GO:0051179//localization;GO:0006810//transport;GO:0015833//peptide transport;GO:0070972//protein localization to endoplasmic reticulum;GO:0033036//macromolecule localization;GO:0034613//cellular protein localization;GO:0071702//organic substance transport;GO:0051649//establishment of localization in cell;GO:0009987//cellular process;GO:0033365//protein localization to organelle;GO:0006886//intrac…
3647861	ENP1	XM_705443.1	Known_gene	1	822571	823998	NC_032095.1	-	1428	1428	129.42	106.94	115.47	115.52	114.56	120.97	117.276	117.016	-0.00874522	0.973178	0.955744	0.163918	0.00016774	0.000116893	-0.0993018	0.0281182	0.0230668	-0.0671312	0.109022	0.09351	K14797//essential nuclear protein 1	XP_710535.1|1.1e-272|snoRNA-binding rRNA-processing protein [Candida albicans SC5314]	GO:0031669//cellular response to nutrient levels;GO:0022613//ribonucleoprotein complex biogenesis;GO:0036170//filamentous growth of a population of unicellular organisms in response to starvation;GO:0009607//response to biotic stimulus;GO:0042254//ribosome biogenesis;GO:0006950//response to stress;GO:1901360//organic cyclic compound metabolic process;GO:0051716//cellular response to stimulus;GO:0…
3639715	3639715	XM_713566.1	Known_gene	1	75931	76707	NC_032096.1	-	777	777	89	108.28	176.53	262.82	172.97	241.64	124.603	225.81	-0.871422	0.00464369	0.00173762	-1.5622	2.32703e-191	2.434e-192	-0.675755	3.02177e-33	1.08118e-33	-0.452946	1.14208e-23	4.55728e-24	NA	XP_718659.1|2.1e-140|hypothetical protein CAALFM_CR00310CA [Candida albicans SC5314]	NA
3646279	3646279	XM_707005.1	Known_gene	1	946421	947119	NC_032094.1	+	699	699	104.58	93.39	121.29	147.3	140.86	137.23	106.42	141.796	-0.43341	0.019044	0.00860827	-0.49415	2.81289e-15	1.31696e-15	-0.592922	1.85631e-19	8.4161e-20	-0.178135	0.00302749	0.0023087	K04649//ubiquitin-conjugating enzyme (huntingtin interacting protein 2) [EC:2.3.2.23]+ko04120//Ubiquitin mediated proteolysis	XP_712098.1|5.1e-130|E2 ubiquitin-conjugating protein [Candida albicans SC5314]	GO:0036503//ERAD pathway;GO:0044267//cellular protein metabolic process;GO:0071840//cellular component organization or biogenesis;GO:0070647//protein modification by small protein conjugation or removal;GO:0044260//cellular macromolecule metabolic process;GO:0043412//macromolecule modification;GO:0008152//metabolic process;GO:0044237//cellular metabolic process;GO:0010243//response to organonitro…
3647294	3647294	XM_706000.2,BGI_novel_T000244	Known_gene	2	1051306	1053439	NC_032096.1	-	2134	2089	13.39	11.23	11.26	18.84	14.93	12.33	11.96	15.366	-0.430541	0.130272	0.077588	-0.492643	2.04899e-06	1.29068e-06	-0.410856	8.22251e-05	5.79896e-05	-0.130966	0.136866	0.118714	NA	XP_711092.2|5.2e-267|hypothetical protein CAALFM_CR04860CA [Candida albicans SC5314]	NA
3643461	3643461	XM_709813.2	Known_gene	1	1065176	1067179	NC_032090.1	-	2004	2004	330.08	350.43	319.64	265.08	229	224.39	333.383	239.49	0.459933	0.0218571	0.0100834	0.316388	1.57989e-44	4.48652e-45	0.613779	1.43848e-159	2.07074e-160	0.51044	3.26009e-103	6.002e-104	K14844//pumilio homology domain family member 6	XP_714906.2|0.0e+00|hypothetical protein CAALFM_C205160CA [Candida albicans SC5314]	GO:0032268//regulation of cellular protein metabolic process;GO:0010556//regulation of macromolecule biosynthetic process;GO:0010608//posttranscriptional regulation of gene expression;GO:0051246//regulation of protein metabolic process;GO:0060255//regulation of macromolecule metabolic process;GO:0050794//regulation of cellular process;GO:0010468//regulation of gene expression;GO:0065007//biologic…
3644108	TAZ1	XM_709174.2	Known_gene	1	1904445	1905677	NC_032090.1	+	1233	1233	32.06	33.14	51.72	17.68	34.11	25.68	38.973	25.823	0.563602	0.0759283	0.0410515	0.858656	1.69484e-16	7.65558e-17	-0.0416212	0.652814	0.627986	1.01008	2.08615e-33	7.07666e-34	K13511//monolysocardiolipin acyltransferase [EC:2.3.1.-]+ko00564//Glycerophospholipid metabolism	XP_714267.2|1.6e-243|lysophosphatidylcholine acyltransferase [Candida albicans SC5314]	GO:0046471//phosphatidylglycerol metabolic process;GO:0006796//phosphate-containing compound metabolic process;GO:0035965//cardiolipin acyl-chain remodeling;GO:0008152//metabolic process;GO:0006650//glycerophospholipid metabolic process;GO:0071840//cellular component organization or biogenesis;GO:0046486//glycerolipid metabolic process;GO:0009987//cellular process;GO:0044238//primary metabolic pr…
3644579	HGT2	XM_708669.2	Known_gene	1	434412	436049	NC_032089.1	-	1638	1638	2855.47	3878.32	3041.06	510.99	1481.03	1437.47	3258.28	1143.16	1.46858	7.43192e-05	1.8552e-05	2.48236	0	0	1.38883	0	0	1.08104	0	0	K08139//MFS transporter, SP family, sugar:H+ symporter+ko04113//Meiosis - yeast	XP_713762.1|0.0e+00|Hgt2p [Candida albicans SC5314]	GO:0006810//transport;GO:0009987//cellular process;GO:0015749//monosaccharide transmembrane transport;GO:0008643//carbohydrate transport;GO:0051179//localization;GO:0055085//transmembrane transport;GO:0071702//organic substance transport;GO:0051234//establishment of localization;GO:1904659//glucose transmembrane transport;GO:0034219//carbohydrate transmembrane transport;GO:0046323//glucose import…
3642294	3642294	XM_710938.2	Known_gene	1	1612098	1613135	NC_032090.1	+	1038	1038	62.36	81.72	98.97	54.12	41.05	44.55	81.016	46.573	0.761034	0.00269275	0.000947589	0.204459	0.00748965	0.00579562	0.993307	2.63078e-42	8.41236e-43	1.15157	9.75434e-64	2.36464e-64	K17868//diphthine methyl ester acylhydrolase [EC:3.1.1.97]	XP_716031.2|5.5e-205|diphthamide synthase [Candida albicans SC5314]	NA
3634822	3634822	XM_718432.1	Known_gene	1	2139718	2140614	NC_032089.1	+	897	897	51.3	52.89	60.99	84.11	101.4	95.35	55.06	93.62	-0.774726	4.54675e-06	9.11165e-07	-0.713319	8.97495e-22	3.60104e-22	-0.938991	1.94449e-40	6.37026e-41	-0.64466	7.54135e-21	3.19144e-21	K22386//GET complex subunit GET2	XP_723525.1|8.7e-167|GET complex subunit [Candida albicans SC5314]	GO:0070727//cellular macromolecule localization;GO:0071840//cellular component organization or biogenesis;GO:0010256//endomembrane system organization;GO:0045184//establishment of protein localization;GO:0061024//membrane organization;GO:0016192//vesicle-mediated transport;GO:0051179//localization;GO:0006996//organelle organization;GO:0051205//protein insertion into membrane;GO:0007029//endoplasm…
3642820	3642820	XM_019475394.1	Known_gene	1	1378116	1378936	NC_032092.1	-	821	618	0.28	1.23	0.84	0.13	0.14	0.53	0.783	0.266	1.11814	0.257926	0.175525	1.10692	0.612431	0.582238	3.13516	0.0145889	0.0117417	0.664397	0.52877	0.498376	K06695//26S proteasome regulatory subunit, ATPase 3, interacting protein	XP_019330939.1|1.8e-110|hypothetical protein CAALFM_C406150CA [Candida albicans SC5314]	GO:0046483//heterocycle metabolic process;GO:0006139//nucleobase-containing compound metabolic process;GO:0043170//macromolecule metabolic process;GO:1903046//meiotic cell cycle process;GO:0006725//cellular aromatic compound metabolic process;GO:0022402//cell cycle process;GO:0007049//cell cycle;GO:0006996//organelle organization;GO:0006807//nitrogen compound metabolic process;GO:0007127//meiosis…
3639210	CDC37	XM_714002.1	Known_gene	1	532206	533732	NC_032094.1	-	1527	1527	80.69	69.75	73.42	53.38	66.84	75.24	74.62	65.153	0.18857	0.388606	0.292283	0.596091	7.85535e-27	2.86006e-27	0.0614815	0.279366	0.253596	-0.0353267	0.481733	0.449628	K09554//cell division cycle protein 37	XP_719095.1|1.5e-288|Cdc37p [Candida albicans SC5314]	GO:0065007//biological regulation;GO:0051301//cell division;GO:0009987//cellular process;GO:0035690//cellular response to drug;GO:0006457//protein folding;GO:0042221//response to chemical;GO:0031647//regulation of protein stability;GO:0065008//regulation of biological quality;GO:0042493//response to drug;GO:0051716//cellular response to stimulus;GO:0007049//cell cycle;GO:0070887//cellular respons…
3645742	3645742	XM_707521.2	Known_gene	1	144138	145490	NC_032092.1	-	1353	1353	31.58	24.2	40.17	24.73	27.83	31.64	31.983	28.066	0.166973	0.532146	0.432496	0.352749	0.000147609	0.000102495	-0.201634	0.0366787	0.0303708	0.344369	2.81001e-05	1.91391e-05	K01409//N6-L-threonylcarbamoyladenine synthase [EC:2.3.1.234]	XP_712614.2|1.5e-263|putative N(6)-L-threonylcarbamoyladenine synthase [Candida albicans SC5314]	GO:0006139//nucleobase-containing compound metabolic process;GO:0034660//ncRNA metabolic process;GO:0090304//nucleic acid metabolic process;GO:0044238//primary metabolic process;GO:1901360//organic cyclic compound metabolic process;GO:0008152//metabolic process;GO:0009987//cellular process;GO:0140053//mitochondrial gene expression;GO:0006807//nitrogen compound metabolic process;GO:0070900//mitoch…
3637001	LDG3	XM_716234.2,BGI_novel_T000218	Known_gene	2	493829	496065	NC_032095.1	+	2237	591	2672.8	750.07	314.15	3.08	20.35	7.36	1245.67	10.263	4.84494	1.93853e-08	2.71452e-09	9.76121	0	0	5.20392	0	0	5.4156	0	0	NA	XP_721327.2|1.6e-79|Ldg3p [Candida albicans SC5314]	NA
3645890	SWD3	XM_707404.1	Known_gene	1	451184	452335	NC_032094.1	-	1152	1152	16.74	16.57	17.12	15.5	17.93	22.83	16.81	18.753	-0.162577	0.527485	0.428006	0.111031	0.440855	0.409428	-0.113802	0.390255	0.360896	-0.415248	0.000466368	0.000338004	K14963//COMPASS component SWD3	XP_712497.1|1.3e-218|Swd3p [Candida albicans SC5314]	GO:0051276//chromosome organization;GO:0006996//organelle organization;GO:0006464//cellular protein modification process;GO:0016570//histone modification;GO:0018022//peptidyl-lysine methylation;GO:0018193//peptidyl-amino acid modification;GO:0008213//protein alkylation;GO:0006479//protein methylation;GO:0018205//peptidyl-lysine modification;GO:1901564//organonitrogen compound metabolic process;GO…
3646928	AVT1	XM_706396.1	Known_gene	1	1288828	1290435	NC_032090.1	-	1608	1608	26.76	26.03	31.93	39.79	46.77	42.92	28.24	43.16	-0.622126	0.000347169	0.000101154	-0.572328	6.63917e-14	3.19684e-14	-0.845408	1.45075e-30	5.3892e-31	-0.426738	2.57281e-09	1.46901e-09	K15015//solute carrier family 32 (vesicular inhibitory amino acid transporter)	XP_711488.1|2.2e-306|Avt1p [Candida albicans SC5314]	GO:0051179//localization;GO:0071705//nitrogen compound transport;GO:0015849//organic acid transport;GO:0003333//amino acid transmembrane transport;GO:0071702//organic substance transport;GO:0009987//cellular process;GO:0098656//anion transmembrane transport;GO:0055085//transmembrane transport;GO:0006811//ion transport;GO:0046942//carboxylic acid transport;GO:0051234//establishment of localization…
3645426	3645426	XM_707865.2	Known_gene	1	391247	392764	NC_032089.1	-	1518	1518	36.08	45.99	40.43	37.92	38.11	44.26	40.833	40.096	0.0190669	0.944152	0.917773	-0.0717596	0.338221	0.30859	0.271151	0.000114294	8.12928e-05	-0.130577	0.0599776	0.0503444	K15027//translation initiation factor 2D	XP_712958.2|1.5e-288|hypothetical protein CAALFM_C101900CA [Candida albicans SC5314]	GO:0071840//cellular component organization or biogenesis;GO:0044267//cellular protein metabolic process;GO:1901566//organonitrogen compound biosynthetic process;GO:0034645//cellular macromolecule biosynthetic process;GO:0002183//cytoplasmic translational initiation;GO:0010467//gene expression;GO:0044237//cellular metabolic process;GO:0009058//biosynthetic process;GO:0044260//cellular macromolecu…
3646927	3646927	XM_706395.1,BGI_novel_T000059	Known_gene	2	1284882	1288468	NC_032090.1	+	3587	3318	18.67	9.67	15.01	60.36	61.93	60.8	14.45	61.03	-2.05728	5.56689e-16	3.16627e-17	-1.69287	1.75662e-238	1.52724e-239	-2.67905	0	0	-2.01815	1.87562e-304	1.6e-305	K20184//vacuolar protein sorting-associated protein 41+ko04138//Autophagy - yeast;K21627//protein IFH1;K15561//nuclear polyadenylated RNA-binding protein 3;K20184//vacuolar protein sorting-associated protein 41+ko04138//Autophagy - yeast;K21627//protein IFH1;K15561//nuclear polyadenylated RNA-binding protein 3	XP_711487.1|0.0e+00|hypothetical protein CAALFM_C206320WA [Candida albicans SC5314]	GO:0043226//organelle;GO:0035770//ribonucleoprotein granule;GO:0043228//non-membrane-bounded organelle;GO:0043232//intracellular non-membrane-bounded organelle;GO:0010494//cytoplasmic stress granule;GO:0005622//intracellular;GO:0036464//cytoplasmic ribonucleoprotein granule;GO:0110165//cellular anatomical entity;GO:0043229//intracellular organelle;GO:0099080//supramolecular complex;GO:0005737//cy…
3638916	3638916	XM_714262.1	Known_gene	1	2174773	2176227	NC_032096.1	-	1455	1455	31.56	46.8	62.02	87.91	89.48	103.25	46.793	93.546	-1.00136	0.00013701	3.62747e-05	-1.47793	3.42187e-121	5.061e-122	-0.935057	1.04914e-60	2.76504e-61	-0.735336	7.60375e-47	2.17268e-47	K01424//L-asparaginase [EC:3.5.1.1]+ko00250//Alanine, aspartate and glutamate metabolism+ko01100//Metabolic pathways+ko01110//Biosynthesis of secondary metabolites+ko00460//Cyanoamino acid metabolism	XP_719355.1|5.2e-278|asparaginase [Candida albicans SC5314]	GO:0008152//metabolic process;GO:0009065//glutamine family amino acid catabolic process;GO:0044237//cellular metabolic process;GO:1901564//organonitrogen compound metabolic process;GO:0044238//primary metabolic process;GO:0019752//carboxylic acid metabolic process;GO:0034641//cellular nitrogen compound metabolic process;GO:1901606//alpha-amino acid catabolic process;GO:1901575//organic substance …
3639682	3639682	XM_713559.1	Known_gene	1	95282	96580	NC_032096.1	+	1299	1299	13.98	9.72	14.5	9.42	12.27	9.31	12.733	10.333	0.277709	0.341189	0.247735	0.569565	0.000114736	7.90768e-05	-0.336107	0.0272493	0.0223176	0.6392	1.33878e-05	8.96014e-06	K00354//NADPH2 dehydrogenase [EC:1.6.99.1]	XP_718652.1|8.8e-253|hypothetical protein CAALFM_CR00380WA [Candida albicans SC5314]	GO:1901265//nucleoside phosphate binding;GO:0005488//binding;GO:0016651//oxidoreductase activity, acting on NAD(P)H;GO:0003959//NADPH dehydrogenase activity;GO:0097367//carbohydrate derivative binding;GO:0000166//nucleotide binding;GO:1901363//heterocyclic compound binding;GO:0032553//ribonucleotide binding;GO:0036094//small molecule binding;GO:0010181//FMN binding;GO:0016491//oxidoreductase acti…
3637770	IFH1	XM_715497.2	Known_gene	1	595462	598119	NC_032093.1	-	2658	2658	54.17	44.13	69.1	123.62	113.14	131.49	55.8	122.75	-1.14609	1.13291e-08	1.53366e-09	-1.19035	6.60889e-232	5.91102e-233	-1.35828	1.92685e-262	1.92846e-263	-0.928195	6.0899e-165	8.21862e-166	K21627//protein IFH1	XP_720590.2|0.0e+00|Ifh1p [Candida albicans SC5314]	GO:0031328//positive regulation of cellular biosynthetic process;GO:2000112//regulation of cellular macromolecule biosynthetic process;GO:0044260//cellular macromolecule metabolic process;GO:0098781//ncRNA transcription;GO:0009891//positive regulation of biosynthetic process;GO:0006807//nitrogen compound metabolic process;GO:1903506//regulation of nucleic acid-templated transcription;GO:0009987//…
3635637	ARL1	XM_717582.1	Known_gene	1	369339	369896	NC_032092.1	-	558	558	62.01	54.14	49.94	80.16	85.82	75.19	55.363	80.39	-0.546831	0.0124984	0.00530035	-0.370382	0.000110355	7.59654e-05	-0.664619	1.77728e-11	9.8069e-12	-0.590345	8.55246e-09	4.9659e-09	K07942//ADP-ribosylation factor-like protein 1	XP_722675.1|2.0e-100|Arf family GTPase [Candida albicans SC5314]	GO:0070887//cellular response to chemical stimulus;GO:0051234//establishment of localization;GO:0060560//developmental growth involved in morphogenesis;GO:0040007//growth;GO:0016049//cell growth;GO:0000902//cell morphogenesis;GO:0042886//amide transport;GO:0050896//response to stimulus;GO:0032502//developmental process;GO:0015833//peptide transport;GO:0051716//cellular response to stimulus;GO:000…
3637996	RPA135	XM_715261.1	Known_gene	1	92423	95923	NC_032095.1	+	3501	3501	176.57	240.31	232.41	191.57	169.24	190.73	216.43	183.846	0.22099	0.335855	0.24308	-0.117631	3.00504e-08	1.74126e-08	0.505826	3.38471e-139	5.45958e-140	0.28514	2.31517e-46	6.63848e-47	K03002//DNA-directed RNA polymerase I subunit RPA2 [EC:2.7.7.6]+ko03020//RNA polymerase	XP_720354.1|0.0e+00|DNA-directed RNA polymerase I core subunit [Candida albicans SC5314]	GO:0043170//macromolecule metabolic process;GO:0034641//cellular nitrogen compound metabolic process;GO:0006139//nucleobase-containing compound metabolic process;GO:0019438//aromatic compound biosynthetic process;GO:0010467//gene expression;GO:0046483//heterocycle metabolic process;GO:0032774//RNA biosynthetic process;GO:0009059//macromolecule biosynthetic process;GO:1901576//organic substance bi…
3642975	UGA6	XM_710268.2	Known_gene	1	570077	571711	NC_032090.1	+	1635	1635	8.33	9.73	10.84	1.41	1.45	1.69	9.633	1.516	2.59993	1.47637e-22	5.05791e-24	2.56262	4.17311e-28	1.47977e-28	2.74639	4.14792e-35	1.45229e-35	2.68127	5.15e-38	1.63458e-38	K09885//aquaporin rerated protein, other eukaryote;K19564//choline transport protein	XP_715361.2|0.0e+00|Uga6p [Candida albicans SC5314]	GO:0031224//intrinsic component of membrane;GO:0016021//integral component of membrane;GO:0016020//membrane;GO:0110165//cellular anatomical entity;GO:0022857//transmembrane transporter activity;GO:0005215//transporter activity;
3637352	CAK1	XM_715824.2	Known_gene	1	895055	896074	NC_032090.1	+	1020	1020	47.47	61.37	77.33	50.66	51.71	51.35	62.056	51.24	0.251893	0.314523	0.223907	-0.093831	0.241669	0.21627	0.24709	0.00116741	0.000878238	0.590664	1.74695e-16	8.17008e-17	K06667//serine/threonine-protein kinase CAK1 [EC:2.7.11.22]+ko04111//Cell cycle - yeast	XP_720917.2|5.4e-197|cyclin-dependent protein kinase-activating kinase [Candida albicans SC5314]	GO:0071900//regulation of protein serine/threonine kinase activity;GO:1904029//regulation of cyclin-dependent protein kinase activity;GO:0043412//macromolecule modification;GO:0051716//cellular response to stimulus;GO:0060255//regulation of macromolecule metabolic process;GO:0016310//phosphorylation;GO:0031399//regulation of protein modification process;GO:0007154//cell communication;GO:0080090//…
3645950	3645950	XM_707306.2	Known_gene	1	984319	985389	NC_032094.1	-	1071	1071	33.83	23.84	21.21	51.19	47.69	76.05	26.293	58.31	-1.12527	0.000106907	2.75223e-05	-0.597559	1.65399e-12	8.31404e-13	-1.0003	1.79364e-26	7.1177e-27	-1.8422	2.4042e-102	4.46632e-103	K15385//aspyridone synthetase trans-acting enoyl reductase;K00344//NADPH2:quinone reductase [EC:1.6.5.5];K11293//protein HIRA/HIR1	XP_712399.2|1.5e-197|hypothetical protein CAALFM_C604410CA [Candida albicans SC5314]	GO:0016491//oxidoreductase activity;GO:0003824//catalytic activity;
3643760	FCR3	XM_709517.1	Known_gene	1	407947	409146	NC_032093.1	+	1200	1200	44.43	35.59	36.2	80.09	66.69	67.96	38.74	71.58	-0.890279	4.36313e-05	1.03545e-05	-0.850088	7.20434e-38	2.20546e-38	-0.905999	3.23516e-35	1.13217e-35	-0.908696	4.17038e-36	1.35909e-36	K09043//AP-1-like transcription factor	XP_714610.1|1.1e-230|Fcr3p [Candida albicans SC5314]	GO:0031326//regulation of cellular biosynthetic process;GO:0030155//regulation of cell adhesion;GO:0048518//positive regulation of biological process;GO:0090605//submerged biofilm formation;GO:0006355//regulation of transcription, DNA-templated;GO:0010811//positive regulation of cell-substrate adhesion;GO:0060255//regulation of macromolecule metabolic process;GO:0065007//biological regulation;GO:…
3645447	3645447	XM_707831.1	Known_gene	1	948352	949059	NC_032090.1	-	708	708	18.19	15.07	21.99	21.65	23.36	30.97	18.416	25.326	-0.469537	0.0802541	0.0439375	-0.251221	0.112853	0.0968382	-0.632361	0.000109032	7.74772e-05	-0.494024	0.000296561	0.000212316	NA	XP_712924.1|1.2e-134|hypothetical protein CAALFM_C204520CA [Candida albicans SC5314]	NA
3640122	3640122	XM_713147.2	Known_gene	1	400727	403447	NC_032096.1	-	2721	2721	82.88	75.8	65.82	73.45	74.2	77.04	74.833	74.896	-0.00667727	0.981191	0.970095	0.174262	4.47671e-06	2.86468e-06	0.0307787	0.443108	0.41406	-0.227082	5.67749e-09	3.27766e-09	K14773//U3 small nucleolar RNA-associated protein 23;K03510//DNA polymerase iota [EC:2.7.7.7]	XP_718240.2|0.0e+00|hypothetical protein CAALFM_CR01770CA [Candida albicans SC5314]	GO:0110165//cellular anatomical entity;GO:0016020//membrane;GO:0031224//intrinsic component of membrane;GO:0016021//integral component of membrane;
3634831	3634831	XM_718382.2	Known_gene	1	2044586	2045479	NC_032089.1	-	894	894	12.92	53.02	37.04	1.43	0.61	0.25	34.326	0.763	4.94073	2.50593e-19	1.09606e-20	3.17552	1.06126e-27	3.79324e-28	6.44158	5.18948e-170	7.06358e-171	7.21101	7.55653e-123	1.26404e-123	K01792//glucose-6-phosphate 1-epimerase [EC:5.1.3.15]+ko00010//Glycolysis / Gluconeogenesis+ko01100//Metabolic pathways+ko01130//Biosynthesis of antibiotics+ko01110//Biosynthesis of secondary metabolites;K18622//adducin	XP_723475.2|1.7e-170|hypothetical protein CAALFM_C109300CA [Candida albicans SC5314]	GO:0008064//regulation of actin polymerization or depolymerization;GO:0061572//actin filament bundle organization;GO:0030036//actin cytoskeleton organization;GO:0030834//regulation of actin filament depolymerization;GO:0010639//negative regulation of organelle organization;GO:0032535//regulation of cellular component size;GO:0022607//cellular component assembly;GO:0030833//regulation of actin fil…
3636858	EHD3	XM_716434.1	Known_gene	1	691821	693329	NC_032089.1	-	1509	1509	58.37	34.18	27.97	102	103.39	117.76	40.173	107.716	-1.38889	6.07842e-06	1.24743e-06	-0.80527	6.01758e-56	1.50239e-56	-1.59687	1.01146e-166	1.40372e-167	-2.0739	3.4817e-269	3.2253e-270	K05605//3-hydroxyisobutyryl-CoA hydrolase [EC:3.1.2.4]+ko00410//beta-Alanine metabolism+ko00280//Valine, leucine and isoleucine degradation+ko01100//Metabolic pathways+ko00640//Propanoate metabolism+ko01200//Carbon metabolism	XP_721527.1|1.1e-291|Ehd3p [Candida albicans SC5314]	GO:0016054//organic acid catabolic process;GO:0044237//cellular metabolic process;GO:0006573//valine metabolic process;GO:1901565//organonitrogen compound catabolic process;GO:0009063//cellular amino acid catabolic process;GO:0071704//organic substance metabolic process;GO:0006574//valine catabolic process;GO:1901575//organic substance catabolic process;GO:1901564//organonitrogen compound metabol…
3637977	3637977	XM_715293.1	Known_gene	1	38507	39679	NC_032095.1	+	1173	1173	58.57	158.82	122.47	47.78	70.9	94.58	113.286	71.086	0.65015	0.112643	0.0655391	0.293755	6.1793e-05	4.19192e-05	1.16354	1.41116e-119	2.53044e-120	0.372821	2.47735e-13	1.2461e-13	K06199//fluoride exporter	XP_720386.1|6.8e-220|fluoride transporter [Candida albicans SC5314]	GO:0006820//anion transport;GO:0098656//anion transmembrane transport;GO:0034220//ion transmembrane transport;GO:0051234//establishment of localization;GO:0006811//ion transport;GO:0098660//inorganic ion transmembrane transport;GO:0009987//cellular process;GO:0055085//transmembrane transport;GO:0051179//localization;GO:0015698//inorganic anion transport;GO:0006810//transport;GO:0098661//inorganic…
3641390	3641390	XM_711897.2	Known_gene	1	635249	636553	NC_032095.1	-	1305	1305	156	214.71	170.17	91.81	91.75	113.13	180.293	98.896	0.851704	0.000121993	3.18728e-05	0.764823	1.28276e-65	2.87788e-66	1.22661	3.12518e-197	3.8576e-198	0.588995	2.97515e-45	8.63498e-46	K14801//pre-rRNA-processing protein TSR4	XP_716990.1|1.4e-253|hypothetical protein CAALFM_C702930CA [Candida albicans SC5314]	GO:0043170//macromolecule metabolic process;GO:0048522//positive regulation of cellular process;GO:0090304//nucleic acid metabolic process;GO:0034641//cellular nitrogen compound metabolic process;GO:0034660//ncRNA metabolic process;GO:1901360//organic cyclic compound metabolic process;GO:0044087//regulation of cellular component biogenesis;GO:0009987//cellular process;GO:0065007//biological regul…
3644399	3644399	XM_708811.2	Known_gene	1	2452098	2452403	NC_032089.1	-	306	306	222.12	267.22	287.18	162.81	170.88	186.93	258.84	173.54	0.546321	0.00499901	0.0018872	0.44815	3.61569e-06	2.30106e-06	0.645044	1.69886e-13	8.85846e-14	0.619457	8.68284e-13	4.44124e-13	K12161//ubiquitin related modifier 1+ko04122//Sulfur relay system	XP_713904.2|1.3e-50|ubiquitin-related modifier [Candida albicans SC5314]	GO:0050896//response to stimulus;GO:0043170//macromolecule metabolic process;GO:0000003//reproduction;GO:0044267//cellular protein metabolic process;GO:0006950//response to stress;GO:0044238//primary metabolic process;GO:0044260//cellular macromolecule metabolic process;GO:1901564//organonitrogen compound metabolic process;GO:0019954//asexual reproduction;GO:0034660//ncRNA metabolic process;GO:00…
3647563	3647563	XM_705755.2	Known_gene	1	414633	415973	NC_032094.1	-	1341	1341	203.45	139.82	118.45	87.86	110.07	101.41	153.906	99.78	0.61172	0.0281685	0.0133464	1.2114	8.17284e-188	8.69828e-189	0.345149	1.51327e-15	7.502e-16	0.224078	2.27311e-06	1.46415e-06	K13342//peroxin-5+ko04146//Peroxisome;K17608//striatin 1/3/4;K11648//SWI/SNF-related matrix-associated actin-dependent regulator of chromatin subfamily B member 1	XP_710847.2|1.0e-267|hypothetical protein CAALFM_C602020CA [Candida albicans SC5314]	GO:0071840//cellular component organization or biogenesis;GO:0071705//nitrogen compound transport;GO:0006605//protein targeting;GO:0016043//cellular component organization;GO:0033036//macromolecule localization;GO:0070727//cellular macromolecule localization;GO:0072662//protein localization to peroxisome;GO:0046907//intracellular transport;GO:0044743//protein transmembrane import into intracellul…
3644018	CIP1	XM_709227.2	Known_gene	1	209410	210309	NC_032094.1	-	900	900	12.2	10.59	10.01	55.32	51.41	70.05	10.933	58.926	-2.40533	2.35866e-27	6.11927e-29	-2.18092	4.0012e-76	8.09036e-77	-2.27935	3.84672e-75	9.0345e-76	-2.80694	2.17122e-128	3.52344e-129	NA	XP_714320.2|5.7e-166|Cip1p [Candida albicans SC5314]	GO:0071248//cellular response to metal ion;GO:0009987//cellular process;GO:0051716//cellular response to stimulus;GO:0010035//response to inorganic substance;GO:0071276//cellular response to cadmium ion;GO:0062197//cellular response to chemical stress;GO:0033554//cellular response to stress;GO:0006950//response to stress;GO:0071241//cellular response to inorganic substance;GO:0006979//response to…
3637750	GYP8	XM_715529.2	Known_gene	1	645248	647530	NC_032093.1	-	2283	2283	24.94	15.82	16.35	30.88	36.8	36.08	19.036	34.586	-0.85278	0.000830306	0.000260014	-0.308211	7.82736e-06	5.06484e-06	-1.21796	1.9472e-62	5.07344e-63	-1.14191	4.09647e-55	1.07428e-55	K20372//TBC1 domain family member 20	XP_720622.2|0.0e+00|Gyp8p [Candida albicans SC5314]	GO:0009987//cellular process;GO:0016192//vesicle-mediated transport;GO:0051649//establishment of localization in cell;GO:0006810//transport;GO:0051179//localization;GO:0006888//endoplasmic reticulum to Golgi vesicle-mediated transport;GO:0051641//cellular localization;GO:0051234//establishment of localization;GO:0048193//Golgi vesicle transport;GO:0046907//intracellular transport;GO:0110165//cell…
3636842	3636842	XM_716400.2	Known_gene	1	633766	634524	NC_032089.1	+	759	759	32.74	37.49	38.43	34.55	34.22	38.04	36.22	35.603	0.00987384	0.973178	0.955818	-0.0776314	0.495486	0.462888	0.131666	0.262139	0.23669	0.0147157	0.959164	0.952932	NA	XP_721493.2|4.5e-140|hypothetical protein CAALFM_C103040WA [Candida albicans SC5314]	GO:0043227//membrane-bounded organelle;GO:0110165//cellular anatomical entity;GO:0043229//intracellular organelle;GO:0005622//intracellular;GO:0043226//organelle;GO:0005634//nucleus;GO:0043231//intracellular membrane-bounded organelle;GO:0005737//cytoplasm;
3636627	PMC1	XM_716705.1	Known_gene	1	264875	268510	NC_032091.1	+	3636	3636	607.43	609.58	501.33	255.26	196.55	210.19	572.78	220.666	1.34812	1.06632e-09	1.26441e-10	1.25075	0	0	1.63292	0	0	1.25407	0	0	K01537//Ca2+-transporting ATPase [EC:3.6.3.8]	XP_721798.1|0.0e+00|calcium-transporting ATPase [Candida albicans SC5314]	GO:0051716//cellular response to stimulus;GO:0055074//calcium ion homeostasis;GO:0072507//divalent inorganic cation homeostasis;GO:0055082//cellular chemical homeostasis;GO:0006873//cellular ion homeostasis;GO:0055065//metal ion homeostasis;GO:0019725//cellular homeostasis;GO:0035690//cellular response to drug;GO:0070887//cellular response to chemical stimulus;GO:0042592//homeostatic process;GO:0…
3636831	MST1	XM_716389.2	Known_gene	1	613106	614473	NC_032089.1	-	1368	1368	52.67	37.62	47.32	20.02	23.59	23.03	45.87	22.213	1.02229	5.25758e-07	9.05846e-08	1.39554	5.65592e-63	1.30659e-63	0.673324	1.32926e-14	6.75164e-15	1.03894	7.13957e-36	2.33386e-36	K01868//threonyl-tRNA synthetase [EC:6.1.1.3]+ko00970//Aminoacyl-tRNA biosynthesis	XP_721482.2|6.0e-268|threonine--tRNA ligase [Candida albicans SC5314]	GO:0006725//cellular aromatic compound metabolic process;GO:0140053//mitochondrial gene expression;GO:0000959//mitochondrial RNA metabolic process;GO:1901360//organic cyclic compound metabolic process;GO:0034641//cellular nitrogen compound metabolic process;GO:0071704//organic substance metabolic process;GO:0044260//cellular macromolecule metabolic process;GO:0044281//small molecule metabolic pro…
3641244	GAL4	XM_712048.1	Known_gene	1	2186547	2187332	NC_032090.1	+	786	786	630.62	701.5	813.21	484.89	470.72	596.64	715.11	517.416	0.447106	0.0182439	0.00817683	0.379113	5.61627e-41	1.66412e-41	0.575574	1.95987e-99	3.95244e-100	0.446767	1.83307e-70	4.21772e-71	K09241//transcriptional regulatory protein GAL4	XP_717141.1|8.0e-148|galactose-responsive transcription factor [Candida albicans SC5314]	GO:0050896//response to stimulus;GO:0051252//regulation of RNA metabolic process;GO:0071496//cellular response to external stimulus;GO:0031329//regulation of cellular catabolic process;GO:0045913//positive regulation of carbohydrate metabolic process;GO:0007154//cell communication;GO:0010604//positive regulation of macromolecule metabolic process;GO:0009605//response to external stimulus;GO:00313…
3644041	3644041	XM_709244.1	Known_gene	1	237060	237734	NC_032094.1	+	675	675	10.34	9.77	14.93	14.68	12.09	14.99	11.68	13.92	-0.274031	0.395677	0.298551	-0.505616	0.0150766	0.0119729	-0.307384	0.176313	0.155697	-0.00578622	0.939738	0.93097	K13130//gem associated protein 2+ko03013//RNA transport	XP_714337.1|2.8e-125|hypothetical protein CAALFM_C601200WA [Candida albicans SC5314]	GO:0043170//macromolecule metabolic process;GO:0071704//organic substance metabolic process;GO:0043933//protein-containing complex subunit organization;GO:0010467//gene expression;GO:0034622//cellular protein-containing complex assembly;GO:0044238//primary metabolic process;GO:0090304//nucleic acid metabolic process;GO:0008152//metabolic process;GO:0000398//mRNA splicing, via spliceosome;GO:00464…
3634860	3634860	XM_718453.1	Known_gene	1	2172939	2173751	NC_032089.1	+	813	813	14.97	11.08	12.59	7.55	3.89	5.13	12.88	5.523	1.15811	0.0010719	0.000343159	0.987526	8.35801e-07	5.17712e-07	1.51012	2.2833e-09	1.35132e-09	1.29525	1.72344e-08	1.01247e-08	NA	XP_723546.1|2.5e-152|hypothetical protein CAALFM_C109930WA [Candida albicans SC5314]	NA
3647184	3647184	XM_706115.2	Known_gene	1	2318202	2319212	NC_032089.1	+	1011	1011	120.25	104.99	205.51	161.44	217.85	185.35	143.583	188.213	-0.410217	0.169493	0.105263	-0.424961	3.53205e-19	1.49659e-19	-1.05308	6.71217e-118	1.21032e-118	0.148956	0.000499154	0.000362348	K02988//small subunit ribosomal protein S5+ko03010//Ribosome	XP_711207.2|3.7e-190|mitochondrial 37S ribosomal protein MRPS5 [Candida albicans SC5314]	GO:1901566//organonitrogen compound biosynthetic process;GO:0044238//primary metabolic process;GO:0009059//macromolecule biosynthetic process;GO:0043170//macromolecule metabolic process;GO:0006412//translation;GO:0008152//metabolic process;GO:0071704//organic substance metabolic process;GO:0006518//peptide metabolic process;GO:0044260//cellular macromolecule metabolic process;GO:0034641//cellular…
3637969	3637969	XM_715302.1	Known_gene	1	26062	27036	NC_032095.1	+	975	975	113.33	104.01	93.08	200.67	238.11	193.25	103.473	210.676	-1.02444	3.45604e-07	5.77635e-08	-0.824295	5.469e-70	1.17687e-70	-1.19491	5.20794e-151	7.82712e-152	-1.05393	4.51528e-101	8.46332e-102	K01183//chitinase [EC:3.2.1.14]+ko00520//Amino sugar and nucleotide sugar metabolism+ko01100//Metabolic pathways;K19848//signaling mucin HKR1+ko04011//MAPK signaling pathway - yeast	XP_720395.1|6.1e-174|hypothetical protein CAALFM_C700190WA [Candida albicans SC5314]	GO:0005618//cell wall;GO:0009277//fungal-type cell wall;GO:0071944//cell periphery;GO:0110165//cellular anatomical entity;GO:0030312//external encapsulating structure;
3639037	ZCF39	XM_714252.1	Known_gene	1	2152028	2154073	NC_032096.1	-	2046	2046	307.69	246.18	197.38	338.95	293.55	268.4	250.416	300.3	-0.266647	0.358553	0.263801	-0.139595	3.64272e-11	1.91055e-11	-0.253893	9.37192e-28	3.63152e-28	-0.443409	2.48342e-70	5.71824e-71	NA	XP_719345.1|0.0e+00|Zcf39p [Candida albicans SC5314]	GO:0019222//regulation of metabolic process;GO:0051252//regulation of RNA metabolic process;GO:0040008//regulation of growth;GO:0080090//regulation of primary metabolic process;GO:2001141//regulation of RNA biosynthetic process;GO:0009607//response to biotic stimulus;GO:0009987//cellular process;GO:0051171//regulation of nitrogen compound metabolic process;GO:0010810//regulation of cell-substrate…
3644443	3644443	XM_708863.1	Known_gene	1	2373907	2374881	NC_032089.1	+	975	975	37.61	38.17	52.83	31.41	35.12	45.19	42.87	37.24	0.184921	0.478337	0.378819	0.259892	0.0114078	0.00896432	0.120146	0.228214	0.204688	0.225354	0.0093651	0.00738348	NA	XP_713956.1|5.9e-185|hypothetical protein CAALFM_C110690WA [Candida albicans SC5314]	GO:0043226//organelle;GO:0110165//cellular anatomical entity;GO:0043231//intracellular membrane-bounded organelle;GO:0005737//cytoplasm;GO:0043229//intracellular organelle;GO:0043227//membrane-bounded organelle;GO:0005739//mitochondrion;GO:0005622//intracellular;
3645648	3645648	XM_707659.1	Known_gene	1	777344	779113	NC_032091.1	+	1770	1770	49.46	35.23	36.81	27.5	41.24	50.1	40.5	39.613	0.032981	0.928564	0.896289	0.846831	1.90783e-35	6.02154e-36	-0.22724	0.000816427	0.000609426	-0.444713	1.77663e-12	9.17622e-13	K01634//sphinganine-1-phosphate aldolase [EC:4.1.2.27]+ko00600//Sphingolipid metabolism+ko01100//Metabolic pathways	XP_712752.1|0.0e+00|sphinganine-1-phosphate aldolase [Candida albicans SC5314]	GO:0019752//carboxylic acid metabolic process;GO:1901565//organonitrogen compound catabolic process;GO:0044238//primary metabolic process;GO:0006629//lipid metabolic process;GO:0006082//organic acid metabolic process;GO:0044248//cellular catabolic process;GO:0071704//organic substance metabolic process;GO:0006665//sphingolipid metabolic process;GO:0008152//metabolic process;GO:0043436//oxoacid me…
3638928	SPT7	XM_714241.1	Known_gene	1	2135208	2139131	NC_032096.1	+	3924	3924	24.02	26.69	24.42	40.03	40.17	38.72	25.043	39.64	-0.666527	0.000141105	3.75232e-05	-0.736845	8.88461e-52	2.3129e-52	-0.589819	1.08931e-35	3.77942e-36	-0.665016	4.14346e-42	1.24815e-42	K11359//transcriptional activator SPT7	XP_719334.1|0.0e+00|SAGA histone acetyltransferase complex subunit [Candida albicans SC5314]	GO:0060255//regulation of macromolecule metabolic process;GO:0036211//protein modification process;GO:0022607//cellular component assembly;GO:0043543//protein acylation;GO:0043933//protein-containing complex subunit organization;GO:0050794//regulation of cellular process;GO:0051276//chromosome organization;GO:0006355//regulation of transcription, DNA-templated;GO:0019538//protein metabolic proces…
3647693	RPC19	XM_705617.1	Known_gene	1	560832	561227	NC_032096.1	+	396	396	208.51	191.1	293.63	321.78	304.9	325.05	231.08	317.243	-0.484261	0.027691	0.0130926	-0.625958	2.11626e-23	8.21268e-24	-0.674008	4.06238e-24	1.67645e-24	-0.146662	0.00564441	0.00438048	K03020//DNA-directed RNA polymerases I and III subunit RPAC2+ko03020//RNA polymerase	XP_710709.1|1.1e-68|DNA-directed RNA polymerase core subunit [Candida albicans SC5314]	GO:0071704//organic substance metabolic process;GO:0010467//gene expression;GO:0006807//nitrogen compound metabolic process;GO:0043170//macromolecule metabolic process;GO:0034654//nucleobase-containing compound biosynthetic process;GO:0016070//RNA metabolic process;GO:0009987//cellular process;GO:0006351//transcription, DNA-templated;GO:0046483//heterocycle metabolic process;GO:0009304//tRNA tran…
3640197	ESP1	XM_713086.2	Known_gene	1	336700	341496	NC_032089.1	-	4797	4797	4.07	6.43	8	6.07	5.81	6.5	6.166	6.126	-0.00872844	0.982709	0.972552	-0.576668	2.09956e-07	1.25889e-07	0.146281	0.156253	0.137149	0.29956	0.00129219	0.000963434	K02365//separase [EC:3.4.22.49]+ko04113//Meiosis - yeast+ko04111//Cell cycle - yeast	XP_718179.2|0.0e+00|separase [Candida albicans SC5314]	GO:0071840//cellular component organization or biogenesis;GO:0033043//regulation of organelle organization;GO:1903046//meiotic cell cycle process;GO:0016043//cellular component organization;GO:0022402//cell cycle process;GO:0022414//reproductive process;GO:0033045//regulation of sister chromatid segregation;GO:0090224//regulation of spindle organization;GO:0010564//regulation of cell cycle proces…
3641200	3641200	XM_712036.1	Known_gene	1	2171151	2171960	NC_032090.1	+	810	810	271.8	128.93	148.33	514.74	475.71	490.12	183.02	493.523	-1.40818	5.11582e-06	1.03542e-06	-0.921298	2.53263e-172	2.87684e-173	-1.88349	0	0	-1.72432	0	0	K09467//zinc-finger protein CreA/MIG	XP_717129.1|1.3e-153|hypothetical protein CAALFM_C210540WA [Candida albicans SC5314]	GO:0051252//regulation of RNA metabolic process;GO:0071496//cellular response to external stimulus;GO:0035690//cellular response to drug;GO:0009605//response to external stimulus;GO:0031667//response to nutrient levels;GO:0000433//carbon catabolite repression of transcription from RNA polymerase II promoter by glucose;GO:0045990//carbon catabolite regulation of transcription;GO:0019222//regulatio…
3636956	3636956	XM_716324.1	Known_gene	1	310445	311785	NC_032095.1	+	1341	1341	29.81	18.93	21.41	32.31	39.13	36.02	23.383	35.82	-0.615243	0.0154002	0.00674607	-0.116184	0.184396	0.162161	-1.0476	5.41042e-30	2.02338e-30	-0.750513	2.05422e-16	9.62082e-17	K18932//palmitoyltransferase [EC:2.3.1.225]	XP_721417.1|6.1e-273|palmitoyltransferase [Candida albicans SC5314]	GO:0006605//protein targeting;GO:0008104//protein localization;GO:0009987//cellular process;GO:0072657//protein localization to membrane;GO:0006810//transport;GO:0015031//protein transport;GO:0018198//peptidyl-cysteine modification;GO:0018231//peptidyl-S-diacylglycerol-L-cysteine biosynthetic process from peptidyl-cysteine;GO:0044249//cellular biosynthetic process;GO:0044238//primary metabolic pr…
3641632	FPG1	XM_019475458.1	Known_gene	1	380495	381680	NC_032094.1	-	1186	1119	115.97	117.19	108.74	68.95	73.6	77.92	113.966	73.49	0.619913	0.000252384	7.09201e-05	0.750129	3.72818e-40	1.11398e-40	0.671072	4.78699e-34	1.6984e-34	0.480817	1.38031e-17	6.28522e-18	K10563//formamidopyrimidine-DNA glycosylase [EC:3.2.2.23 4.2.99.18]+ko03410//Base excision repair	XP_019331003.1|2.2e-215|Fpg1p [Candida albicans SC5314]	GO:0044237//cellular metabolic process;GO:0006289//nucleotide-excision repair;GO:0006807//nitrogen compound metabolic process;GO:0044260//cellular macromolecule metabolic process;GO:0008152//metabolic process;GO:0046483//heterocycle metabolic process;GO:0006259//DNA metabolic process;GO:0006284//base-excision repair;GO:0006974//cellular response to DNA damage stimulus;GO:0006950//response to stre…
3647133	3647133	BGI_novel_T000162,XM_019475444.1	Known_gene	2	115818	116508	NC_032094.1	-	691	497	25.98	55.4	80.68	46.44	46.99	44.07	54.02	45.833	0.157357	0.724431	0.642077	-0.837967	1.54347e-07	9.19294e-08	0.237532	0.185635	0.164455	0.872414	2.38887e-11	1.27484e-11	K05765//cofilin;K05765//cofilin	XP_019330989.1|1.7e-69|hypothetical protein CAALFM_C600660CA [Candida albicans SC5314]	GO:0032535//regulation of cellular component size;GO:0009987//cellular process;GO:0051014//actin filament severing;GO:0051129//negative regulation of cellular component organization;GO:0050794//regulation of cellular process;GO:0008064//regulation of actin polymerization or depolymerization;GO:0090066//regulation of anatomical structure size;GO:0065007//biological regulation;GO:0030833//regulatio…
3640255	YMX6	XM_712959.2	Known_gene	1	739894	741762	NC_032094.1	+	1869	1869	38.63	37.09	34.94	31.74	37.21	52.98	36.886	40.643	-0.137551	0.625679	0.529637	0.28342	4.36371e-05	2.937e-05	-0.00466012	0.943981	0.93847	-0.600568	8.41719e-23	3.41484e-23	K17871//NADH:ubiquinone reductase (non-electrogenic) [EC:1.6.5.9]	XP_718052.2|0.0e+00|Ymx6p [Candida albicans SC5314]	GO:0008152//metabolic process;GO:0019646//aerobic electron transport chain;GO:0044237//cellular metabolic process;GO:0009987//cellular process;GO:0006091//generation of precursor metabolites and energy;GO:0055114//oxidation-reduction process;GO:0022904//respiratory electron transport chain;GO:0009060//aerobic respiration;GO:0022900//electron transport chain;GO:0045333//cellular respiration;GO:001…
3647755	3647755	XM_705557.2	Known_gene	1	183121	185799	NC_032091.1	+	2679	2679	14.05	9.33	9.33	12.13	13.36	15.3	10.903	13.596	-0.317527	0.259426	0.176718	0.211991	0.0261244	0.0211554	-0.517971	2.01542e-07	1.28119e-07	-0.713583	1.19928e-13	5.9824e-14	K20361//intracellular protein transport protein USO1	XP_710649.2|0.0e+00|hypothetical protein CAALFM_C300910WA [Candida albicans SC5314]	NA
3644561	PLB1	XM_708729.2	Known_gene	1	405913	407730	NC_032094.1	+	1818	1818	3.96	7.27	3.79	2.59	2.11	2.42	5.006	2.373	1.03762	0.00700405	0.00277926	0.612548	0.00890646	0.00692758	1.78471	5.1783e-18	2.41078e-18	0.647191	0.00737416	0.00577204	K13333//lysophospholipase [EC:3.1.1.5]+ko00564//Glycerophospholipid metabolism	XP_713822.1|0.0e+00|Plb1p [Candida albicans SC5314]	GO:0008152//metabolic process;GO:0009405//pathogenesis;GO:0009987//cellular process;GO:0044242//cellular lipid catabolic process;GO:0046475//glycerophospholipid catabolic process;GO:0016042//lipid catabolic process;GO:0051701//interaction with host;GO:0046434//organophosphate catabolic process;GO:0006793//phosphorus metabolic process;GO:0009056//catabolic process;GO:0046503//glycerolipid cataboli…
3640977	3640977	XM_712271.2	Known_gene	1	932629	934485	NC_032096.1	+	1857	1857	389.06	409.98	381.48	418.86	339.29	350.91	393.506	369.686	0.0752262	0.760043	0.681928	-0.106475	7.59847e-08	4.47252e-08	0.273035	2.12842e-39	7.05096e-40	0.120506	3.26204e-08	1.93809e-08	K14835//25S rRNA (cytosine2870-C5)-methyltransferase [EC:2.1.1.310]	XP_001525417.1|2.7e-287|nucleolar protein NOP2 [Lodderomyces elongisporus NRRL YB-4239]	GO:0006725//cellular aromatic compound metabolic process;GO:0022613//ribonucleoprotein complex biogenesis;GO:0032259//methylation;GO:0006807//nitrogen compound metabolic process;GO:0090304//nucleic acid metabolic process;GO:0043170//macromolecule metabolic process;GO:0042254//ribosome biogenesis;GO:0008152//metabolic process;GO:0016070//RNA metabolic process;GO:0016072//rRNA metabolic process;GO:…
3640763	NOT5	XM_712551.2	Known_gene	1	1820165	1822153	NC_032089.1	+	1989	1989	62.56	49.12	56.56	91.09	99.66	92.01	56.08	94.253	-0.755678	2.21839e-05	5.03593e-06	-0.542052	4.49888e-34	1.45517e-34	-1.0207	1.16752e-108	2.22598e-109	-0.702009	1.03839e-53	2.76984e-54	K12580//CCR4-NOT transcription complex subunit 3+ko03018//RNA degradation	XP_717644.2|0.0e+00|CCR4-NOT core subunit [Candida albicans SC5314]	GO:0051246//regulation of protein metabolic process;GO:0043170//macromolecule metabolic process;GO:0010556//regulation of macromolecule biosynthetic process;GO:0048523//negative regulation of cellular process;GO:0044419//interspecies interaction between organisms;GO:0051252//regulation of RNA metabolic process;GO:0010558//negative regulation of macromolecule biosynthetic process;GO:0006725//cellu…
3634906	3634906	XM_718491.2	Known_gene	1	2279973	2281007	NC_032089.1	+	1035	1035	16.49	19.31	14.76	22.42	13.46	21.77	16.853	19.216	-0.195263	0.578618	0.479407	-0.443195	0.000552791	0.00039756	0.52067	0.00021685	0.000156624	-0.560649	2.17973e-05	1.47373e-05	K22438//trans-aconitate 3-methyltransferase [EC:2.1.1.145]	XP_723584.2|5.0e-198|hypothetical protein CAALFM_C110310WA [Candida albicans SC5314]	GO:0016740//transferase activity;GO:0016741//transferase activity, transferring one-carbon groups;GO:0008168//methyltransferase activity;GO:0003824//catalytic activity;
3644080	RPN10	XM_709180.1	Known_gene	1	1253885	1254724	NC_032090.1	-	840	840	408.7	291.24	254.84	304.15	385.51	377.97	318.26	355.876	-0.162149	0.585047	0.486291	0.426259	3.71575e-36	1.16287e-36	-0.40456	4.06795e-32	1.48061e-32	-0.56868	1.08494e-58	2.76024e-59	K03029//26S proteasome regulatory subunit N10+ko03050//Proteasome	XP_714273.1|6.7e-153|proteasome regulatory particle base subunit [Candida albicans SC5314]	GO:0043632//modification-dependent macromolecule catabolic process;GO:0043933//protein-containing complex subunit organization;GO:0006508//proteolysis;GO:0065003//protein-containing complex assembly;GO:1901565//organonitrogen compound catabolic process;GO:0071704//organic substance metabolic process;GO:0016043//cellular component organization;GO:0009057//macromolecule catabolic process;GO:0030163…
3642347	3642347	XM_710969.2	Known_gene	1	1671420	1672556	NC_032090.1	-	1137	1137	20.52	17.6	22.66	45.66	46.52	45.31	20.26	45.83	-1.18564	3.38012e-11	3.32222e-12	-1.1539	9.87302e-34	3.21646e-34	-1.40228	4.05497e-46	1.24118e-46	-0.999682	6.1091e-27	2.30338e-27	K02218//casein kinase 1 [EC:2.7.11.1]+ko04011//MAPK signaling pathway - yeast+ko04392//Hippo signaling pathway - multiple species	XP_716062.2|1.6e-221|casein kinase [Candida albicans SC5314]	GO:0006807//nitrogen compound metabolic process;GO:0019538//protein metabolic process;GO:0006464//cellular protein modification process;GO:0036211//protein modification process;GO:1901564//organonitrogen compound metabolic process;GO:0006468//protein phosphorylation;GO:0044267//cellular protein metabolic process;GO:0044237//cellular metabolic process;GO:0044238//primary metabolic process;GO:00431…
3646359	TEF4	XM_706941.1	Known_gene	1	741739	742398	NC_032093.1	+	660	660	13.1	9.17	17.03	7.31	9.04	17.38	13.1	11.243	0.197628	0.676107	0.584692	0.841624	0.000438233	0.000312982	0.020599	0.941943	0.93613	-0.0293496	0.840205	0.823686	K03233//elongation factor 1-gamma	XP_712034.1|4.1e-121|Tef4p [Candida albicans SC5314]	GO:0034645//cellular macromolecule biosynthetic process;GO:1901566//organonitrogen compound biosynthetic process;GO:0006412//translation;GO:0008152//metabolic process;GO:1901576//organic substance biosynthetic process;GO:0044267//cellular protein metabolic process;GO:0009059//macromolecule biosynthetic process;GO:1901564//organonitrogen compound metabolic process;GO:0034641//cellular nitrogen com…
3634915	3634915	XM_718349.2,BGI_novel_T000019	Known_gene	2	1960295	1961950	NC_032089.1	+	1656	1656	27.78	25.95	30.4	33.22	30.79	37.17	28.043	33.726	-0.279013	0.141612	0.0852778	-0.258005	0.00112658	0.000825798	-0.246727	0.0024773	0.00190498	-0.290067	0.000111299	7.79392e-05	NA	XP_723442.2|0.0e+00|hypothetical protein CAALFM_C109000WA [Candida albicans SC5314]	GO:0016020//membrane;GO:0110165//cellular anatomical entity;GO:0016021//integral component of membrane;GO:0031224//intrinsic component of membrane;
3646134	ATP1	XM_019475100.1	Known_gene	1	949329	951471	NC_032089.1	+	2143	1641	1709.01	1813.3	2581.22	1993.74	1798.16	1717.66	2034.51	1836.52	0.12053	0.640249	0.545271	-0.222316	1.96967e-112	3.07064e-113	0.0120962	0.259087	0.233762	0.587609	0	0	K02132//F-type H+-transporting ATPase subunit alpha+ko01100//Metabolic pathways+ko00190//Oxidative phosphorylation	XP_019330645.1|1.8e-303|F1F0 ATP synthase subunit alpha [Candida albicans SC5314]	GO:0044238//primary metabolic process;GO:0006796//phosphate-containing compound metabolic process;GO:0006810//transport;GO:1901566//organonitrogen compound biosynthetic process;GO:0051234//establishment of localization;GO:0072521//purine-containing compound metabolic process;GO:0009142//nucleoside triphosphate biosynthetic process;GO:0055086//nucleobase-containing small molecule metabolic process…
3638973	FAA4	XM_714261.1	Known_gene	1	2172466	2174556	NC_032096.1	+	2091	2091	559.66	422.49	309.48	565.78	548.94	581.8	430.543	565.506	-0.387369	0.191412	0.121857	-0.0156905	0.287577	0.26018	-0.377731	4.05057e-108	7.74304e-109	-0.910677	0	0	K01897//long-chain acyl-CoA synthetase [EC:6.2.1.3]+ko04146//Peroxisome+ko01100//Metabolic pathways+ko00061//Fatty acid biosynthesis+ko01212//Fatty acid metabolism+ko00071//Fatty acid degradation	XP_719354.1|0.0e+00|long-chain fatty acid-CoA ligase [Candida albicans SC5314]	GO:0015908//fatty acid transport;GO:0006869//lipid transport;GO:0015711//organic anion transport;GO:0051179//localization;GO:0015909//long-chain fatty acid transport;GO:0044539//long-chain fatty acid import into cell;GO:0015718//monocarboxylic acid transport;GO:0098657//import into cell;GO:0051234//establishment of localization;GO:0071702//organic substance transport;GO:0046942//carboxylic acid t…
3642013	3642013	XM_711197.2	Known_gene	1	2704534	2707485	NC_032089.1	+	2952	2952	11.96	9.57	9.43	10.32	11.48	13.48	10.32	11.76	-0.190079	0.443624	0.34447	0.212774	0.0296292	0.0241218	-0.262532	0.00785287	0.0062037	-0.515491	5.18231e-08	3.11526e-08	K11294//nucleolin	XP_716290.2|0.0e+00|hypothetical protein CAALFM_C112430WA [Candida albicans SC5314]	GO:0071555//cell wall organization;GO:0071840//cellular component organization or biogenesis;GO:0050789//regulation of biological process;GO:0007010//cytoskeleton organization;GO:0038203//TORC2 signaling;GO:0031929//TOR signaling;GO:0035556//intracellular signal transduction;GO:0050896//response to stimulus;GO:0030952//establishment or maintenance of cytoskeleton polarity;GO:0007165//signal trans…
3641893	CHS2	XM_711340.1	Known_gene	1	1926708	1929737	NC_032096.1	-	3030	3030	127.62	106	63.97	71.04	57.64	49.93	99.196	59.536	0.71184	0.0350231	0.0170427	0.845151	1.51674e-156	1.85171e-157	0.878922	4.18379e-140	6.70662e-141	0.357489	9.48841e-18	4.30472e-18	K00698//chitin synthase [EC:2.4.1.16]+ko00520//Amino sugar and nucleotide sugar metabolism	XP_716433.1|0.0e+00|chitin synthase [Candida albicans SC5314]	GO:0071840//cellular component organization or biogenesis;GO:0009058//biosynthetic process;GO:0006040//amino sugar metabolic process;GO:0043170//macromolecule metabolic process;GO:0046349//amino sugar biosynthetic process;GO:0006023//aminoglycan biosynthetic process;GO:1901566//organonitrogen compound biosynthetic process;GO:0006037//cell wall chitin metabolic process;GO:1901564//organonitrogen c…
3645451	SUV3	XM_707851.2	Known_gene	1	908645	910807	NC_032090.1	-	2163	2163	40.88	34.3	49.63	44.13	43.1	38.05	41.603	41.76	-0.0279038	0.918506	0.882609	-0.110365	0.0566718	0.0472328	-0.329479	4.31149e-08	2.6696e-08	0.383316	1.82047e-11	9.66346e-12	K17675//ATP-dependent RNA helicase SUPV3L1/SUV3 [EC:3.6.4.13]	XP_712944.2|0.0e+00|ATP-dependent RNA helicase [Candida albicans SC5314]	GO:0010467//gene expression;GO:0042493//response to drug;GO:0044237//cellular metabolic process;GO:0055114//oxidation-reduction process;GO:0030447//filamentous growth;GO:0090304//nucleic acid metabolic process;GO:0009060//aerobic respiration;GO:0044260//cellular macromolecule metabolic process;GO:0006725//cellular aromatic compound metabolic process;GO:0090609//single-species submerged biofilm fo…
3648426	3648426	XM_704883.2	Known_gene	1	765465	766517	NC_032089.1	+	1053	1053	91.3	82.32	98.02	62.73	82.34	85.05	90.546	76.706	0.226625	0.267754	0.183683	0.541459	3.02141e-17	1.33961e-17	-0.000350466	0.994508	0.991854	0.204765	0.000694119	0.00050862	NA	XP_709975.2|3.6e-204|hypothetical protein CAALFM_C103690WA [Candida albicans SC5314]	GO:0071840//cellular component organization or biogenesis;GO:0016043//cellular component organization;GO:0010256//endomembrane system organization;GO:0006996//organelle organization;GO:0009987//cellular process;GO:0007030//Golgi organization;GO:0005737//cytoplasm;GO:0005794//Golgi apparatus;GO:0005622//intracellular;GO:0043229//intracellular organelle;GO:0043226//organelle;GO:0012505//endomembran…
3639731	3639731	XM_713591.1	Known_gene	1	28507	30687	NC_032096.1	+	2181	2181	60.48	47.59	35.78	34.99	46.51	45.96	47.95	42.486	0.174421	0.582473	0.483768	0.789515	1.33342e-47	3.66446e-48	0.0331175	0.565154	0.537438	-0.361225	5.03448e-10	2.80998e-10	NA	XP_718684.1|0.0e+00|hypothetical protein CAALFM_CR00110WA [Candida albicans SC5314]	GO:0042221//response to chemical;GO:0071496//cellular response to external stimulus;GO:0010605//negative regulation of macromolecule metabolic process;GO:2000113//negative regulation of cellular macromolecule biosynthetic process;GO:0051253//negative regulation of RNA metabolic process;GO:0060255//regulation of macromolecule metabolic process;GO:0031670//cellular response to nutrient;GO:0080090//…
3638388	3638388	XM_714898.1	Known_gene	1	622956	624053	NC_032091.1	+	1098	1098	26.2	20.37	18.22	29.94	38.49	35.89	21.596	34.773	-0.682396	0.00585992	0.00227361	-0.192507	0.0591131	0.0493758	-0.918038	1.90371e-19	8.63736e-20	-0.978059	3.90214e-20	1.67281e-20	NA	XP_719979.2|9.2e-211|hypothetical protein CAALFM_C302900WA [Candida albicans SC5314]	NA
3646028	3646028	XM_707257.2	Known_gene	1	1579345	1581459	NC_032096.1	-	2115	2115	54.66	44.43	31.63	117.77	118.85	120.31	43.573	118.976	-1.42464	3.34262e-08	4.83076e-09	-1.10741	4.44058e-155	5.45828e-156	-1.41954	1.49136e-231	1.64933e-232	-1.92739	0	0	K19069//cellobiose dehydrogenase (acceptor) [EC:1.1.99.18]	XP_712350.2|0.0e+00|hypothetical protein CAALFM_CR07250CA [Candida albicans SC5314]	GO:1901265//nucleoside phosphate binding;GO:0097159//organic cyclic compound binding;GO:0003824//catalytic activity;GO:0005488//binding;GO:0036094//small molecule binding;GO:0000166//nucleotide binding;GO:0016899//oxidoreductase activity, acting on the CH-OH group of donors, oxygen as acceptor;GO:0050660//flavin adenine dinucleotide binding;GO:0016614//oxidoreductase activity, acting on CH-OH gro…
30515077	DAD1	XM_019475183.1	Known_gene	1	3013321	3013620	NC_032089.1	-	300	300	4.45	7.11	13.66	21.13	21.3	32.07	8.406	24.833	-1.50956	0.00110045	0.000353578	-2.24742	8.068e-08	4.75426e-08	-1.58293	2.436e-05	1.67777e-05	-1.23127	1.1203e-05	7.46244e-06	K11553//DASH complex subunit DAD1	XP_019330728.1|5.5e-49|Dad1p [Candida albicans SC5314]	GO:0006996//organelle organization;GO:1903047//mitotic cell cycle process;GO:0007051//spindle organization;GO:0071840//cellular component organization or biogenesis;GO:0016043//cellular component organization;GO:0007010//cytoskeleton organization;GO:0007017//microtubule-based process;GO:0009987//cellular process;GO:0022402//cell cycle process;GO:0000278//mitotic cell cycle;GO:0000226//microtubule…
3640580	IFF11	XM_712681.1	Known_gene	1	95652	97187	NC_032091.1	+	1536	1536	0.39	0.61	0.34	0.14	0.33	0.18	0.446	0.216	0.882177	0.27271	0.188126	1.47805	0.13841	0.119991	0.886343	0.212156	0.189578	0.917538	0.376152	0.344942	K19900//hyphal wall protein	KGR12455.1|1.9e-294|hypothetical protein MG3_02532 [Candida albicans P78048]	NA
3643913	ERG9	XM_709367.2	Known_gene	1	1751816	1753162	NC_032090.1	+	1347	1347	136.39	200.69	203.42	51.41	51.8	56.5	180.166	53.236	1.72387	5.76935e-16	3.29101e-17	1.40762	4.46832e-160	5.38074e-161	1.95394	0	0	1.84814	0	0	K00801//farnesyl-diphosphate farnesyltransferase [EC:2.5.1.21]+ko00909//Sesquiterpenoid and triterpenoid biosynthesis+ko01100//Metabolic pathways+ko01130//Biosynthesis of antibiotics+ko01110//Biosynthesis of secondary metabolites+ko00100//Steroid biosynthesis	XP_714460.2|4.5e-260|bifunctional farnesyl-diphosphate farnesyltransferase/squalene synthase [Candida albicans SC5314]	GO:0009058//biosynthetic process;GO:0071704//organic substance metabolic process;GO:0044238//primary metabolic process;GO:0044237//cellular metabolic process;GO:1901360//organic cyclic compound metabolic process;GO:0044255//cellular lipid metabolic process;GO:0097384//cellular lipid biosynthetic process;GO:0006066//alcohol metabolic process;GO:0006720//isoprenoid metabolic process;GO:1901617//org…
3647449	3647449	XM_705849.1	Known_gene	1	1782289	1783212	NC_032091.1	+	924	924	5.43	8.51	4.01	2.95	3.33	3.12	5.983	3.133	0.89625	0.0363386	0.0177856	0.880237	0.00468349	0.00357502	1.35364	1.76369e-07	1.11941e-07	0.362056	0.310349	0.280514	K16329//pseudouridylate synthase [EC:4.2.1.70]+ko00240//Pyrimidine metabolism;K16330//pseudouridylate synthase / pseudouridine kinase [EC:4.2.1.70 2.7.1.83]+ko00240//Pyrimidine metabolism	XP_710941.1|2.5e-169|hypothetical protein CAALFM_C307910WA [Candida albicans SC5314]	GO:0003824//catalytic activity;GO:0016798//hydrolase activity, acting on glycosyl bonds;GO:0016787//hydrolase activity;
3645377	RBT1	BGI_novel_T000127,XM_704874.2	Known_gene	2	744953	747331	NC_032092.1	-	2379	2166	5.36	4.57	5.27	13.71	11.33	12.34	5.066	12.46	-1.30112	2.24792e-09	2.77018e-10	-1.35492	3.43193e-26	1.26382e-26	-1.30988	1.06068e-20	4.66736e-21	-1.22747	1.24371e-20	5.2778e-21	K19900//hyphal wall protein;K19900//hyphal wall protein	XP_709966.2|0.0e+00|Rbt1p [Candida albicans SC5314]	GO:0071840//cellular component organization or biogenesis;GO:0009405//pathogenesis;GO:0045229//external encapsulating structure organization;GO:0016043//cellular component organization;GO:0009987//cellular process;GO:0071852//fungal-type cell wall organization or biogenesis;GO:0071555//cell wall organization;GO:0031505//fungal-type cell wall organization;GO:0071554//cell wall organization or biog…
3644452	3644452	XM_708845.2	Known_gene	1	2399586	2401076	NC_032089.1	-	1491	1491	123.2	88.43	82.67	169.69	183.67	206.64	98.1	186.666	-0.919294	8.00871e-05	2.01516e-05	-0.461899	8.14222e-35	2.60242e-35	-1.05451	8.00954e-154	1.18907e-154	-1.32168	3.72017e-246	3.68174e-247	K01228//mannosyl-oligosaccharide glucosidase [EC:3.2.1.106]+ko04141//Protein processing in endoplasmic reticulum+ko01100//Metabolic pathways+ko00510//N-Glycan biosynthesis	XP_713938.2|5.5e-291|hypothetical protein CAALFM_C110840CA [Candida albicans SC5314]	GO:0016192//vesicle-mediated transport;GO:0009987//cellular process;GO:0051641//cellular localization;GO:0006810//transport;GO:0042147//retrograde transport, endosome to Golgi;GO:0051234//establishment of localization;GO:0051179//localization;GO:0016197//endosomal transport;GO:0016482//cytosolic transport;GO:0051649//establishment of localization in cell;GO:0046907//intracellular transport;GO:004…
3637817	3637817	XM_715537.2	Known_gene	1	660366	660920	NC_032093.1	+	555	555	46.72	48.72	77.86	28.43	36.46	29.77	57.766	31.553	0.82943	0.00214425	0.000737097	0.716626	2.20058e-07	1.32167e-07	0.4182	0.00108562	0.000815074	1.38702	9.20836e-32	3.20344e-32	K18160//NADH dehydrogenase [ubiquinone] 1 alpha subcomplex assembly factor 2	XP_720630.1|2.5e-103|hypothetical protein CAALFM_C502990WA [Candida albicans SC5314]	GO:0009987//cellular process;GO:0006091//generation of precursor metabolites and energy;GO:0045333//cellular respiration;GO:0055114//oxidation-reduction process;GO:0044237//cellular metabolic process;GO:0008152//metabolic process;GO:0015980//energy derivation by oxidation of organic compounds;GO:0110165//cellular anatomical entity;GO:0016020//membrane;GO:0016651//oxidoreductase activity, acting o…
3640100	PRS	XM_713108.2	Known_gene	1	342520	344247	NC_032096.1	+	1728	1728	28.25	26.46	51.86	15.1	20.28	19.59	35.523	18.323	0.910437	0.00186753	0.00063454	0.903702	1.48783e-22	5.89034e-23	0.383755	1.23384e-05	8.3745e-06	1.4045	2.4196e-80	5.148e-81	K01881//prolyl-tRNA synthetase [EC:6.1.1.15]+ko00970//Aminoacyl-tRNA biosynthesis	XP_718201.2|0.0e+00|putative proline--tRNA ligase [Candida albicans SC5314]	GO:0009059//macromolecule biosynthetic process;GO:0043043//peptide biosynthetic process;GO:0034660//ncRNA metabolic process;GO:0009987//cellular process;GO:0044237//cellular metabolic process;GO:0044281//small molecule metabolic process;GO:0034641//cellular nitrogen compound metabolic process;GO:0044249//cellular biosynthetic process;GO:0043039//tRNA aminoacylation;GO:0006399//tRNA metabolic proc…
3648225	3648225	XM_705081.1	Known_gene	1	1553189	1554349	NC_032096.1	-	1161	1161	6.11	10.2	7.73	36.47	41.13	35.9	8.013	37.833	-2.20677	4.9854e-18	2.37953e-19	-2.57747	7.53824e-82	1.44638e-82	-2.01162	5.77933e-69	1.42001e-69	-2.21544	1.00826e-67	2.3703e-68	K05747//Wiskott-Aldrich syndrome protein+ko04144//Endocytosis	XP_710173.1|2.0e-224|hypothetical protein CAALFM_CR07120CA [Candida albicans SC5314]	GO:0016020//membrane;GO:0110165//cellular anatomical entity;GO:0016021//integral component of membrane;GO:0031224//intrinsic component of membrane;
3643009	3643009	XM_710288.1	Known_gene	1	536192	536950	NC_032090.1	+	759	759	8.73	6.76	8.9	39.06	45.74	51.96	8.13	45.586	-2.46627	3.25799e-28	8.12738e-30	-2.16164	5.59111e-44	1.60172e-44	-2.75836	5.13256e-68	1.27051e-68	-2.54552	1.69112e-70	3.88828e-71	NA	XP_715381.1|2.6e-135|hypothetical protein CAALFM_C202660WA [Candida albicans SC5314]	NA
3642266	ALS6	XM_710986.2,BGI_novel_T000109	Known_gene	2	1407764	1411864	NC_032091.1	-	4101	4101	26.14	21.84	27.52	16.32	14.35	14.94	25.166	15.203	0.700652	0.000147645	3.94834e-05	0.679618	6.33938e-31	2.15712e-31	0.605922	9.55853e-22	4.12954e-22	0.8813	2.42368e-49	6.7275e-50	K22493//agglutinin-like protein;K22493//agglutinin-like protein	XP_716079.2|0.0e+00|Als6p [Candida albicans SC5314]	GO:0007160//cell-matrix adhesion;GO:0098609//cell-cell adhesion;GO:0009405//pathogenesis;GO:0043709//cell adhesion involved in single-species biofilm formation;GO:0090608//multi-species submerged biofilm formation;GO:0044419//interspecies interaction between organisms;GO:0009987//cellular process;GO:0044403//symbiotic process;GO:0043710//cell adhesion involved in multi-species biofilm formation;G…
3647856	3647856	XM_705453.2,BGI_novel_T000130	Known_gene	2	822133	824731	NC_032092.1	+	2599	2578	22.27	23.84	21.81	6.41	5.13	6.42	22.64	5.986	1.78487	1.77874e-16	9.70274e-18	1.79671	5.68462e-52	1.47512e-52	2.21635	3.81521e-72	9.16414e-73	1.76434	4.5475e-49	1.26606e-49	K09291//nucleoprotein TPR+ko03013//RNA transport;K20361//intracellular protein transport protein USO1;K20361//intracellular protein transport protein USO1;K09291//nucleoprotein TPR+ko03013//RNA transport	XP_710545.1|4.2e-283|hypothetical protein CAALFM_C403880WA [Candida albicans SC5314]	NA
3639275	3639275	XM_714061.2	Known_gene	1	648469	650490	NC_032094.1	+	2022	2022	14.83	8.61	10.27	2.79	1.95	2.64	11.236	2.46	2.12202	3.5919e-12	3.2317e-13	2.41018	1.47799e-57	3.61374e-58	2.14254	1.51916e-29	5.71426e-30	1.95983	2.8505e-31	1.00162e-31	NA	XP_719154.2|0.0e+00|hypothetical protein CAALFM_C603090WA [Candida albicans SC5314]	NA
3642806	SEC3	XM_710474.2	Known_gene	1	1393150	1395522	NC_032092.1	-	2373	2373	83.18	65.3	67	58.68	64.35	57.16	71.826	60.063	0.245453	0.263486	0.180032	0.503368	1.65834e-32	5.4882e-33	0.0211428	0.653964	0.62942	0.229155	5.95542e-07	3.72784e-07	K19983//exocyst complex component 1	XP_715567.2|0.0e+00|GTP-Rho binding exocyst subunit [Candida albicans SC5314]	GO:0070727//cellular macromolecule localization;GO:0016192//vesicle-mediated transport;GO:0008104//protein localization;GO:0048193//Golgi vesicle transport;GO:0036180//filamentous growth of a population of unicellular organisms in response to biotic stimulus;GO:0007163//establishment or maintenance of cell polarity;GO:0033036//macromolecule localization;GO:0044182//filamentous growth of a populat…
3636810	BMH1	XM_716419.1	Known_gene	1	675074	675868	NC_032089.1	-	795	795	1022.07	1037.91	1266.37	1502.38	1527.45	1603.89	1108.78	1544.57	-0.494179	0.00151971	0.000505476	-0.555756	5.40261e-205	5.35402e-206	-0.557444	4.44221e-206	5.37956e-207	-0.340876	9.89055e-92	1.95768e-92	K06630//14-3-3 protein epsilon+ko04011//MAPK signaling pathway - yeast	XP_721512.1|3.9e-142|14-3-3 family protein [Candida albicans SC5314]	GO:0050789//regulation of biological process;GO:0009266//response to temperature stimulus;GO:0033554//cellular response to stress;GO:0048584//positive regulation of response to stimulus;GO:0009405//pathogenesis;GO:0040007//growth;GO:0045927//positive regulation of growth;GO:1900428//regulation of filamentous growth of a population of unicellular organisms;GO:0030435//sporulation resulting in form…
3639487	3639487	XM_713692.2	Known_gene	1	1516783	1517724	NC_032089.1	-	942	942	8.86	9.22	11.42	4.6	4.65	5.11	9.833	4.786	1.00131	0.000249243	6.9803e-05	0.945673	7.11302e-05	4.84666e-05	0.987536	2.29464e-05	1.57926e-05	1.16017	8.09589e-08	4.89638e-08	NA	XP_718785.2|1.7e-173|hypothetical protein CAALFM_C107100CA [Candida albicans SC5314]	NA
3636643	3636643	XM_716612.2	Known_gene	1	472269	473408	NC_032091.1	-	1140	1140	89.43	122.4	142.94	110.8	104.09	107.88	118.256	107.59	0.114786	0.668723	0.576527	-0.309127	4.18042e-09	2.34992e-09	0.233772	3.05347e-06	2.02614e-06	0.405982	2.96344e-17	1.35927e-17	K00809//deoxyhypusine synthase [EC:2.5.1.46]	XP_721705.2|8.1e-218|deoxyhypusine synthase [Candida albicans SC5314]	GO:0006464//cellular protein modification process;GO:0019538//protein metabolic process;GO:0071704//organic substance metabolic process;GO:0051604//protein maturation;GO:0009058//biosynthetic process;GO:0018205//peptidyl-lysine modification;GO:0009987//cellular process;GO:0010467//gene expression;GO:0044238//primary metabolic process;GO:0044260//cellular macromolecule metabolic process;GO:0043170…
3643924	GPD1	XM_709309.2	Known_gene	1	2107703	2108914	NC_032090.1	+	1212	1212	106.96	115.85	95.2	181	131.28	211.39	106.003	174.556	-0.714355	0.00498432	0.00187933	-0.758918	4.76909e-70	1.02547e-70	-0.180389	9.8426e-05	6.9793e-05	-1.15087	6.65878e-162	9.17496e-163	K00006//glycerol-3-phosphate dehydrogenase (NAD+) [EC:1.1.1.8]+ko04011//MAPK signaling pathway - yeast+ko01110//Biosynthesis of secondary metabolites+ko00564//Glycerophospholipid metabolism	XP_714402.1|5.4e-228|glycerol-3-phosphate dehydrogenase (NAD(+)) [Candida albicans SC5314]	GO:0046434//organophosphate catabolic process;GO:0006734//NADH metabolic process;GO:0007155//cell adhesion;GO:0005975//carbohydrate metabolic process;GO:0046168//glycerol-3-phosphate catabolic process;GO:0044238//primary metabolic process;GO:0009056//catabolic process;GO:0031589//cell-substrate adhesion;GO:0022610//biological adhesion;GO:0006796//phosphate-containing compound metabolic process;GO…
3645869	3645869	XM_707413.2	Known_gene	1	466317	467456	NC_032094.1	+	1140	1140	7.38	14.01	21.17	11.09	12.64	13.54	14.186	12.423	0.160961	0.713779	0.62974	-0.587567	0.000968277	0.000705726	0.14846	0.32808	0.300498	0.644794	7.81854e-07	4.93316e-07	K02427//23S rRNA (uridine2552-2'-O)-methyltransferase [EC:2.1.1.166];K15508//21S rRNA (uridine2791-2'-O)-methyltransferase [EC:2.1.1.168]	XP_712506.1|5.4e-222|hypothetical protein CAALFM_C602250WA [Candida albicans SC5314]	GO:0009059//macromolecule biosynthetic process;GO:0006412//translation;GO:0044237//cellular metabolic process;GO:0043414//macromolecule methylation;GO:0030488//tRNA methylation;GO:0043412//macromolecule modification;GO:0034641//cellular nitrogen compound metabolic process;GO:0016070//RNA metabolic process;GO:0006396//RNA processing;GO:0006518//peptide metabolic process;GO:0090304//nucleic acid me…
3642344	3642344	XM_710966.2	Known_gene	1	1665658	1669284	NC_032090.1	+	3627	3627	51.92	73.55	79.15	11.89	11.62	13.5	68.206	12.336	2.4238	8.65066e-31	1.91342e-32	2.12654	0	0	2.66212	0	0	2.55163	0	0	K07497//putative transposase	XP_716059.2|0.0e+00|hypothetical protein CAALFM_C208240WA [Candida albicans SC5314]	GO:0071704//organic substance metabolic process;GO:0009987//cellular process;GO:0006259//DNA metabolic process;GO:0008152//metabolic process;GO:0090304//nucleic acid metabolic process;GO:0006725//cellular aromatic compound metabolic process;GO:0043170//macromolecule metabolic process;GO:0006807//nitrogen compound metabolic process;GO:0015074//DNA integration;GO:0044238//primary metabolic process;…
3646979	LAP4	XM_706331.1	Known_gene	1	801071	802807	NC_032093.1	+	1737	1737	18.36	14.94	14.68	25.22	26.86	30.6	15.993	27.56	-0.782955	0.000151158	4.05486e-05	-0.458002	4.28125e-07	2.60982e-07	-0.846279	1.21642e-19	5.49264e-20	-1.05968	1.41682e-31	4.94776e-32	K01268//aminopeptidase I [EC:3.4.11.22]	XP_711423.1|0.0e+00|Lap4p [Candida albicans SC5314]	GO:0009987//cellular process;GO:0044260//cellular macromolecule metabolic process;GO:1901575//organic substance catabolic process;GO:0009057//macromolecule catabolic process;GO:0019538//protein metabolic process;GO:0007039//protein catabolic process in the vacuole;GO:0044238//primary metabolic process;GO:1901564//organonitrogen compound metabolic process;GO:0006807//nitrogen compound metabolic pr…
3640153	PRK1	XM_713177.2	Known_gene	1	447150	449222	NC_032096.1	+	2073	2073	66.59	58.01	63.44	81.19	92.62	100.24	62.68	91.35	-0.547903	0.000990679	0.000315344	-0.285997	1.0724e-10	5.71388e-11	-0.675022	8.52435e-53	2.41156e-53	-0.659994	8.48143e-55	2.2327e-55	K08853//AP2-associated kinase [EC:2.7.11.1]	XP_718270.2|0.0e+00|serine/threonine protein kinase [Candida albicans SC5314]	GO:0044238//primary metabolic process;GO:0000147//actin cortical patch assembly;GO:0016043//cellular component organization;GO:0016310//phosphorylation;GO:0019538//protein metabolic process;GO:0006793//phosphorus metabolic process;GO:0030036//actin cytoskeleton organization;GO:0044260//cellular macromolecule metabolic process;GO:0036211//protein modification process;GO:0044237//cellular metabolic…
3642911	RPT5	XM_710339.2	Known_gene	1	1532681	1533973	NC_032092.1	+	1293	1293	439.06	338.42	294.3	286.87	335.73	320.98	357.26	314.526	0.177047	0.502972	0.403265	0.614021	1.71908e-122	2.51678e-123	0.0115134	0.691903	0.669628	-0.125196	4.78108e-06	3.13216e-06	K03065//26S proteasome regulatory subunit T5+ko03050//Proteasome	XP_715432.2|5.5e-239|proteasome regulatory particle base subunit [Candida albicans SC5314]	GO:0044267//cellular protein metabolic process;GO:0009056//catabolic process;GO:0048522//positive regulation of cellular process;GO:1903506//regulation of nucleic acid-templated transcription;GO:0060260//regulation of transcription initiation from RNA polymerase II promoter;GO:1901565//organonitrogen compound catabolic process;GO:0045898//regulation of RNA polymerase II transcription preinitiatio…
3638799	CKB1	XM_714455.1	Known_gene	1	37264	38145	NC_032090.1	-	882	882	105.29	125.82	121.62	105.93	112.79	117.51	117.576	112.076	0.0566927	0.793081	0.723441	-0.00874281	0.827632	0.809574	0.157722	0.00586013	0.00459524	0.049597	0.474805	0.442292	K03115//casein kinase II subunit beta+ko04139//Mitophagy - yeast+ko03008//Ribosome biogenesis in eukaryotes	XP_719548.1|3.0e-172|casein kinase 2 regulatory subunit [Candida albicans SC5314]	GO:0071704//organic substance metabolic process;GO:0043170//macromolecule metabolic process;GO:0018209//peptidyl-serine modification;GO:1903506//regulation of nucleic acid-templated transcription;GO:0050896//response to stimulus;GO:0044237//cellular metabolic process;GO:0010468//regulation of gene expression;GO:2001141//regulation of RNA biosynthetic process;GO:0016310//phosphorylation;GO:0006356…
3645659	HTB1	XM_707633.1	Known_gene	1	817866	818258	NC_032091.1	-	393	393	833.6	934.77	804.64	328.64	311.49	366.71	857.67	335.613	1.32413	2.97852e-13	2.37767e-14	1.34285	5.47435e-191	5.73512e-192	1.58543	1.2859e-277	1.23335e-278	1.1337	2.78465e-140	4.27766e-141	K11252//histone H2B	XP_712726.1|6.1e-64|histone H2B [Candida albicans SC5314]	GO:0022607//cellular component assembly;GO:0006996//organelle organization;GO:0071824//protein-DNA complex subunit organization;GO:0034622//cellular protein-containing complex assembly;GO:0044085//cellular component biogenesis;GO:0065003//protein-containing complex assembly;GO:0006325//chromatin organization;GO:0043933//protein-containing complex subunit organization;GO:0006323//DNA packaging;GO:…
3647674	APN2	XM_705628.2	Known_gene	1	2360939	2362294	NC_032089.1	+	1356	1356	2.34	4.2	6.22	6.77	7.33	8.56	4.253	7.553	-0.821797	0.0287429	0.0136377	-1.53265	2.58938e-10	1.40121e-10	-0.803424	9.65009e-05	6.84118e-05	-0.460696	0.0103734	0.0082026	K10772//AP endonuclease 2 [EC:4.2.99.18]+ko03410//Base excision repair	XP_710720.2|3.4e-263|DNA-(apurinic or apyrimidinic site) lyase [Candida albicans SC5314]	GO:0006281//DNA repair;GO:0006259//DNA metabolic process;GO:0044237//cellular metabolic process;GO:0006807//nitrogen compound metabolic process;GO:0046483//heterocycle metabolic process;GO:0006974//cellular response to DNA damage stimulus;GO:0034641//cellular nitrogen compound metabolic process;GO:1901360//organic cyclic compound metabolic process;GO:0008152//metabolic process;GO:0006950//respons…
[truncated: 5,499 more rows]
