# Supplementary material for: The Antimicrobial Peptide AMP-17 Derived from Musca domestica Inhibits Biofilm Formation and Eradicates Mature Biofilm in Candida albicans
Source: Antibiotics (Basel). 2022 Oct 25;11(11):1474. doi: 10.3390/antibiotics11111474 (PMC9686669; doi:10.3390/antibiotics11111474)
Supplement: Supplementary file 1 [file antibiotics-11-01474-s001.zip › Talble S5. the DEGs of AMP-17 treated preformed biofilms by RNA-seq.xlsx]

## Sheet: Sheet1
gene_id	gene_id_alias	gene_transcript_id	gene_type	gene_transcript_num	gene_start	gene_end	gene_chr	gene_strand	gene_len	gene_max_transcript_len	fpkm_A4_1aA	fpkm_A4_1cA	fpkm_A4_2AA	fpkm_C3_1aA	fpkm_C3_2AA	fpkm_C3_3aA	average_fpkm_A4	average_fpkm_C3	diffexp_log2fc_C3-vs-A4	diffexp_deseq2_qvalue_C3-vs-A4	diffexp_pvalue_C3-vs-A4	diffexp_log2fc_C3_1aA-vs-A4_1aA	diffexp_possiondis_fdr_C3_1aA-vs-A4_1aA	diffexp_pvalue_C3_1aA-vs-A4_1aA	diffexp_log2fc_C3_2AA-vs-A4_2AA	diffexp_possiondis_fdr_C3_2AA-vs-A4_2AA	diffexp_pvalue_C3_2AA-vs-A4_2AA	diffexp_log2fc_C3_3aA-vs-A4_1cA	diffexp_possiondis_fdr_C3_3aA-vs-A4_1cA	diffexp_pvalue_C3_3aA-vs-A4_1cA	desc_kegg	desc_nr	desc_go
3645875	3645875	XM_707419.2	Known_gene	1	479401	481050	NC_032094.1	+	1650	1650	140.76	99.55	60.32	62.67	66.02	70.1	100.21	66.263	0.594343	0.336331	0.132675	1.16739	8.2603e-138	1.35551e-138	-0.130267	0.0372001	0.030969	0.506007	1.69871e-25	5.34648e-26	K11365//SAGA-associated factor 73	XP_712512.2|0.0e+00|deubiquitination module subunit [Candida albicans SC5314]	NA
3643108	3643108	XM_710148.1	Known_gene	1	857114	859144	NC_032095.1	-	2031	2031	321.24	244.83	198.23	873.21	564.05	618.25	254.766	685.17	-1.31259	0.00392857	0.000243288	-1.44268	0	0	-1.50865	0	0	-1.33641	0	0	K19877//chitin biosynthesis protein CHS5;K22493//agglutinin-like protein	XP_715241.1|0.0e+00|hypothetical protein CAALFM_C703890CA [Candida albicans SC5314]	GO:0031224//intrinsic component of membrane;GO:0016021//integral component of membrane;GO:0110165//cellular anatomical entity;GO:0016020//membrane;
3638430	3638430	XM_714772.1	Known_gene	1	1673212	1675362	NC_032091.1	+	2151	2151	108.03	174.25	111.75	253.43	433.79	421.82	131.343	369.68	-1.37337	0.00390475	0.000240512	-1.23016	0	0	-1.95672	0	0	-1.27547	0	0	NA	XP_719865.1|0.0e+00|hypothetical protein CAALFM_C307290WA [Candida albicans SC5314]	GO:0110165//cellular anatomical entity;GO:0005622//intracellular;GO:0005737//cytoplasm;
3640308	3640308	XM_712995.2	Known_gene	1	815053	816966	NC_032094.1	-	1914	1914	45.41	39.89	51.09	42.98	27.54	37.64	45.463	36.053	0.32505	0.529726	0.289882	0.0793446	0.235125	0.208864	0.891512	6.54011e-38	2.06754e-38	0.0837605	0.173962	0.147214	K15072//SCF-associated factor 1	XP_718088.2|0.0e+00|SCF ubiquitin ligase complex subunit [Candida albicans SC5314]	GO:0050794//regulation of cellular process;GO:0050896//response to stimulus;GO:0007154//cell communication;GO:0051493//regulation of cytoskeleton organization;GO:0007265//Ras protein signal transduction;GO:0051716//cellular response to stimulus;GO:0033043//regulation of organelle organization;GO:0007088//regulation of mitotic nuclear division;GO:0065007//biological regulation;GO:0070507//regulati…
3637884	3637884	XM_715427.1	Known_gene	1	462582	463040	NC_032092.1	-	459	459	6.94	3.31	22.01	13.4	10.78	8.92	10.753	11.033	-0.0826465	0.94691	0.885117	-0.949225	0.00409047	0.00307744	1.0298	6.0294e-05	4.24112e-05	-1.43021	0.00223667	0.00153496	NA	XP_720520.1|1.5e-82|hypothetical protein CAALFM_C402330CA [Candida albicans SC5314]	GO:0031224//intrinsic component of membrane;GO:0016021//integral component of membrane;GO:0016020//membrane;GO:0110165//cellular anatomical entity;
3634895	DAK2	XM_718370.1	Known_gene	1	2017549	2019336	NC_032089.1	-	1788	1788	4.84	6.08	22.09	27.64	19.65	13.52	11.003	20.27	-0.837084	0.271981	0.0936335	-2.51368	2.22486e-86	4.84314e-87	0.168864	0.0836986	0.0717756	-1.15295	8.78278e-15	3.63354e-15	K00863//triose/dihydroxyacetone kinase / FAD-AMP lyase (cyclizing) [EC:2.7.1.28 2.7.1.29 4.6.1.15]+ko01100//Metabolic pathways+ko00051//Fructose and mannose metabolism+ko00680//Methane metabolism+ko01200//Carbon metabolism+ko00561//Glycerolipid metabolism	XP_723463.1|0.0e+00|dihydroxyacetone kinase [Candida albicans SC5314]	GO:0009056//catabolic process;GO:0019563//glycerol catabolic process;GO:0044262//cellular carbohydrate metabolic process;GO:0044281//small molecule metabolic process;GO:0044275//cellular carbohydrate catabolic process;GO:1901615//organic hydroxy compound metabolic process;GO:0046174//polyol catabolic process;GO:0046164//alcohol catabolic process;GO:0019405//alditol catabolic process;GO:0044237//c…
3642947	NOP1	XM_710354.1	Known_gene	1	1497789	1498739	NC_032092.1	+	951	951	191.74	308.01	560.33	484.49	383.31	354.63	353.36	407.476	-0.22014	0.760509	0.565793	-1.33732	0	0	0.547765	1.7666e-80	3.37212e-81	-0.203337	5.72241e-07	3.13766e-07	K14563//rRNA 2'-O-methyltransferase fibrillarin [EC:2.1.1.-]+ko03008//Ribosome biogenesis in eukaryotes	XP_715447.1|5.6e-180|rRNA methyltransferase [Candida albicans SC5314]	GO:0043628//ncRNA 3'-end processing;GO:2001141//regulation of RNA biosynthetic process;GO:0010468//regulation of gene expression;GO:0006996//organelle organization;GO:0031123//RNA 3'-end processing;GO:0034963//box C/D snoRNA processing;GO:0018364//peptidyl-glutamine methylation;GO:0071840//cellular component organization or biogenesis;GO:0060255//regulation of macromolecule metabolic process;GO:0…
3636156	3636156	XM_717041.1	Known_gene	1	2813599	2815155	NC_032089.1	-	1557	1557	11.11	8.6	9.23	8.32	4.74	5.84	9.646	6.3	0.589402	0.320485	0.122976	0.417203	0.00740747	0.00568088	0.961444	2.51584e-07	1.58479e-07	0.558368	0.00156519	0.00105547	K08150//MFS transporter, SP family, solute carrier family 2 (myo-inositol transporter), member 13	XP_722134.1|8.6e-295|hypothetical protein CAALFM_C112930CA [Candida albicans SC5314]	GO:0051179//localization;GO:1904659//glucose transmembrane transport;GO:0008643//carbohydrate transport;GO:0009987//cellular process;GO:0006810//transport;GO:0055085//transmembrane transport;GO:0034219//carbohydrate transmembrane transport;GO:0071702//organic substance transport;GO:0046323//glucose import;GO:0051234//establishment of localization;GO:0008645//hexose transmembrane transport;GO:0015…
3638392	ECM14	XM_714902.2	Known_gene	1	639619	641031	NC_032091.1	-	1413	1413	149.09	129.71	476.02	589.82	484.94	479.01	251.606	517.923	-1.00267	0.10559	0.0211986	-1.98409	0	0	-0.0267841	0.389285	0.36185	-1.88477	0	0	K08783//extracellular matrix protein 14 [EC:3.4.17.-]	XP_719995.2|8.3e-281|putative metallocarboxypeptidase [Candida albicans SC5314]	GO:0019538//protein metabolic process;GO:0008152//metabolic process;GO:0006508//proteolysis;GO:1901564//organonitrogen compound metabolic process;GO:0071704//organic substance metabolic process;GO:0006807//nitrogen compound metabolic process;GO:0043170//macromolecule metabolic process;GO:0044238//primary metabolic process;GO:0110165//cellular anatomical entity;GO:0005576//extracellular region;GO:…
3639557	3639557	XM_713765.2	Known_gene	1	1361000	1363132	NC_032089.1	-	2133	2133	85.26	65.85	94.74	87.08	77.73	105.26	81.95	90.023	-0.128468	0.828361	0.659848	-0.0304724	0.502221	0.468246	0.285502	3.75313e-11	2.08716e-11	-0.676702	2.17277e-52	4.61864e-53	K12196//vacuolar protein-sorting-associated protein 4+ko04144//Endocytosis;K14563//rRNA 2'-O-methyltransferase fibrillarin [EC:2.1.1.-]+ko03008//Ribosome biogenesis in eukaryotes	XP_718858.2|0.0e+00|hypothetical protein CAALFM_C106400CA [Candida albicans SC5314]	GO:0005634//nucleus;GO:0005622//intracellular;GO:0043229//intracellular organelle;GO:0043231//intracellular membrane-bounded organelle;GO:0043226//organelle;GO:0043227//membrane-bounded organelle;GO:0110165//cellular anatomical entity;
3643802	3643802	XM_709450.2	Known_gene	1	2003065	2004369	NC_032090.1	-	1305	1305	33.66	22.95	69.17	21.52	17.2	24.49	41.926	21.07	0.882986	0.123499	0.0272543	0.645357	1.42808e-10	7.99888e-11	2.00774	2.53384e-113	3.69836e-114	-0.0936986	0.533724	0.493634	K01190//beta-galactosidase [EC:3.2.1.23]+ko00600//Sphingolipid metabolism+ko00511//Other glycan degradation+ko01100//Metabolic pathways+ko00052//Galactose metabolism	XP_714543.2|3.5e-249|hypothetical protein CAALFM_C209810CA [Candida albicans SC5314]	GO:0016787//hydrolase activity;GO:0016810//hydrolase activity, acting on carbon-nitrogen (but not peptide) bonds;GO:0016813//hydrolase activity, acting on carbon-nitrogen (but not peptide) bonds, in linear amidines;GO:0003824//catalytic activity;
3636978	CYP1	XM_716220.2	Known_gene	1	519130	519618	NC_032095.1	-	489	489	37.14	26.91	503.14	229.7	125.21	53.36	189.063	136.09	0.257446	0.848146	0.693997	-2.62871	3.92362e-157	5.92616e-158	2.00661	2.32756e-245	1.73362e-246	-0.987616	3.60185e-09	1.79094e-09	K01802//peptidylprolyl isomerase [EC:5.2.1.8]	XP_721313.1|1.4e-89|peptidylprolyl isomerase [Candida albicans SC5314]	GO:0044238//primary metabolic process;GO:0048869//cellular developmental process;GO:0098732//macromolecule deacylation;GO:0051276//chromosome organization;GO:0048468//cell development;GO:0009653//anatomical structure morphogenesis;GO:0043935//sexual sporulation resulting in formation of a cellular spore;GO:0048522//positive regulation of cellular process;GO:0016570//histone modification;GO:003043…
3636599	3636599	XM_716637.1	Known_gene	1	428436	429026	NC_032091.1	-	591	591	34.87	24.75	186.09	68.33	55.54	73.5	81.903	65.79	0.194358	0.863189	0.718917	-0.970533	6.62402e-16	3.24546e-16	1.7444	7.08801e-98	1.16121e-98	-1.57032	2.42461e-32	6.73072e-33	NA	XP_721730.1|8.2e-113|hypothetical protein CAALFM_C301950CA [Candida albicans SC5314]	GO:0031224//intrinsic component of membrane;GO:0110165//cellular anatomical entity;GO:0016020//membrane;GO:0016021//integral component of membrane;
3636485	3636485	XM_716741.2	Known_gene	1	966890	968029	NC_032093.1	-	1140	1140	18.19	9.02	29.52	44.85	28.41	27.26	18.91	33.506	-0.782171	0.221156	0.0668218	-1.30196	1.99131e-35	6.9489e-36	0.0552939	0.574856	0.548936	-1.59559	3.31278e-28	9.90328e-29	K01956//carbamoyl-phosphate synthase small subunit [EC:6.3.5.5]+ko00250//Alanine, aspartate and glutamate metabolism+ko01100//Metabolic pathways+ko00240//Pyrimidine metabolism	XP_721834.2|7.6e-224|hypothetical protein CAALFM_C504380CA [Candida albicans SC5314]	NA
3639360	TUF1	XM_713916.1	Known_gene	1	95214	96494	NC_032089.1	+	1281	1281	340.7	356.18	970.3	404.99	470.7	480.56	555.726	452.083	0.23027	0.75526	0.560127	-0.249384	4.58698e-20	2.06844e-20	1.04362	0	0	-0.43211	4.06247e-57	8.21232e-58	K02358//elongation factor Tu	XP_719009.1|9.7e-244|translation elongation factor Tu [Candida albicans SC5314]	GO:0034645//cellular macromolecule biosynthetic process;GO:0006518//peptide metabolic process;GO:0009059//macromolecule biosynthetic process;GO:0044260//cellular macromolecule metabolic process;GO:0008152//metabolic process;GO:0032543//mitochondrial translation;GO:1901576//organic substance biosynthetic process;GO:0043603//cellular amide metabolic process;GO:0034641//cellular nitrogen compound me…
3645221	3645221	XM_708036.1	Known_gene	1	1538564	1539199	NC_032090.1	+	636	636	291.77	246.22	662.12	513.4	442.09	436.03	400.036	463.84	-0.230092	0.73858	0.53703	-0.815252	8.57088e-91	1.79541e-91	0.582753	3.89487e-66	8.58588e-67	-0.824479	3.78036e-70	6.69552e-71	K03964//NADH dehydrogenase (ubiquinone) 1 beta subcomplex subunit 8+ko01100//Metabolic pathways+ko00190//Oxidative phosphorylation	XP_713129.1|3.1e-118|hypothetical protein CAALFM_C207550WA [Candida albicans SC5314]	GO:0043227//membrane-bounded organelle;GO:0005622//intracellular;GO:0043226//organelle;GO:0016020//membrane;GO:0043231//intracellular membrane-bounded organelle;GO:0005739//mitochondrion;GO:0031224//intrinsic component of membrane;GO:0016021//integral component of membrane;GO:0005737//cytoplasm;GO:0071944//cell periphery;GO:0110165//cellular anatomical entity;GO:0005886//plasma membrane;GO:004322…
3647450	3647450	XM_705850.1	Known_gene	1	1781343	1782407	NC_032091.1	-	1065	1065	206.82	173.79	144.84	56.7	67.73	92.56	175.15	72.33	1.23646	0.00560931	0.000381922	1.86696	7.21852e-248	8.05012e-249	1.09659	1.56189e-77	3.07788e-78	0.908884	9.94353e-74	1.69095e-74	K16330//pseudouridylate synthase / pseudouridine kinase [EC:4.2.1.70 2.7.1.83]+ko00240//Pyrimidine metabolism;K16329//pseudouridylate synthase [EC:4.2.1.70]+ko00240//Pyrimidine metabolism	XP_710942.1|4.5e-202|hypothetical protein CAALFM_C307900CA [Candida albicans SC5314]	NA
3638302	3638302	XM_714959.2	Known_gene	1	761498	762349	NC_032091.1	+	852	852	188.19	112.92	155.79	94.1	84.78	108.77	152.3	95.883	0.653241	0.167518	0.0440058	0.999923	5.30384e-68	1.31441e-68	0.877807	3.7957e-45	1.07126e-45	0.0540203	0.187239	0.159331	K17080//prohibitin 1	XP_720052.2|5.4e-150|prohibitin subunit [Candida albicans SC5314]	GO:0071944//cell periphery;GO:0005740//mitochondrial envelope;GO:0005622//intracellular;GO:0005737//cytoplasm;GO:0031090//organelle membrane;GO:0031966//mitochondrial membrane;GO:0005743//mitochondrial inner membrane;GO:0043227//membrane-bounded organelle;GO:0005886//plasma membrane;GO:0110165//cellular anatomical entity;GO:0031975//envelope;GO:0005739//mitochondrion;GO:0016020//membrane;GO:00432…
3648111	3648111	XM_705190.2	Known_gene	1	1017114	1021940	NC_032090.1	-	4827	4827	61.06	82.7	29.73	75.79	63.99	72.18	57.83	70.653	-0.220305	0.785606	0.599785	-0.31178	2.42091e-23	1.02844e-23	-1.10593	5.56099e-170	5.86932e-171	0.196288	1.35937e-11	6.19496e-12	K12879//THO complex subunit 2+ko03040//Spliceosome+ko03013//RNA transport	XP_710282.2|0.0e+00|hypothetical protein CAALFM_C204870CA [Candida albicans SC5314]	GO:0034613//cellular protein localization;GO:0006396//RNA processing;GO:0006139//nucleobase-containing compound metabolic process;GO:0070727//cellular macromolecule localization;GO:0051649//establishment of localization in cell;GO:0010467//gene expression;GO:0016070//RNA metabolic process;GO:0050657//nucleic acid transport;GO:0042886//amide transport;GO:0006403//RNA localization;GO:0015931//nucle…
30515216	30515216	XM_019475335.1	Known_gene	1	1457202	1457699	NC_032091.1	+	498	498	NA	NA	NA	NA	NA	NA	NA	NA	NA	NA	NA	NA	NA	NA	NA	NA	NA	NA	NA	NA	K14842//ribosome biogenesis protein NSA2	KGR10372.1|2.9e-87|ribosome biogenesis protein NSA2 [Candida albicans P78048]	GO:0006396//RNA processing;GO:0006807//nitrogen compound metabolic process;GO:0044085//cellular component biogenesis;GO:0090304//nucleic acid metabolic process;GO:0000470//maturation of LSU-rRNA;GO:0044237//cellular metabolic process;GO:0034641//cellular nitrogen compound metabolic process;GO:0071840//cellular component organization or biogenesis;GO:0042254//ribosome biogenesis;GO:0043170//macrom…
3645105	3645105	XM_708159.2	Known_gene	1	699794	700975	NC_032096.1	+	1182	1182	24.4	19.79	55.33	52.75	41.79	47.97	33.173	47.503	-0.517527	0.403002	0.183421	-1.11229	6.17275e-34	2.1954e-34	0.404904	3.96544e-07	2.5178e-07	-1.27736	1.84808e-36	4.82594e-37	K06965//protein pelota+ko03015//mRNA surveillance pathway	XP_713252.2|4.0e-220|ribosome dissociation factor [Candida albicans SC5314]	GO:0050789//regulation of biological process;GO:1901564//organonitrogen compound metabolic process;GO:0009057//macromolecule catabolic process;GO:0043170//macromolecule metabolic process;GO:0006493//protein O-linked glycosylation;GO:0016070//RNA metabolic process;GO:0009893//positive regulation of metabolic process;GO:0050794//regulation of cellular process;GO:0006464//cellular protein modificati…
3645744	3645744	XM_707548.2	Known_gene	1	97569	98888	NC_032092.1	-	1320	1320	11.5	7.8	31.03	15	11.59	9.3	16.776	11.963	0.381887	0.641648	0.412313	-0.383329	0.00856307	0.0065915	1.42078	1.40151e-32	4.88234e-33	-0.253757	0.21606	0.185817	K17764//maintenance of mitochondrial morphology protein 1+ko04139//Mitophagy - yeast	XP_712641.2|1.3e-246|ERMES complex subunit [Candida albicans SC5314]	GO:0070585//protein localization to mitochondrion;GO:0008104//protein localization;GO:0006810//transport;GO:0006886//intracellular protein transport;GO:0046907//intracellular transport;GO:0006839//mitochondrial transport;GO:0033036//macromolecule localization;GO:0051649//establishment of localization in cell;GO:0000002//mitochondrial genome maintenance;GO:0007006//mitochondrial membrane organizat…
3636194	GCV3	XM_717117.1	Known_gene	1	3008286	3008819	NC_032089.1	-	534	534	126.91	84.98	438.01	350.87	260.74	176.31	216.633	262.64	-0.30339	0.73858	0.537467	-1.46713	3.18136e-126	5.53488e-127	0.748352	3.51355e-54	8.73694e-55	-1.05292	8.994e-35	2.40908e-35	K02437//glycine cleavage system H protein+ko01100//Metabolic pathways+ko01130//Biosynthesis of antibiotics+ko01110//Biosynthesis of secondary metabolites+ko00260//Glycine, serine and threonine metabolism+ko01200//Carbon metabolism+ko00630//Glyoxylate and dicarboxylate metabolism	XP_722210.1|5.7e-97|glycine decarboxylase subunit H [Candida albicans SC5314]	GO:1901564//organonitrogen compound metabolic process;GO:0044282//small molecule catabolic process;GO:0009063//cellular amino acid catabolic process;GO:0008152//metabolic process;GO:0009056//catabolic process;GO:1901606//alpha-amino acid catabolic process;GO:0006544//glycine metabolic process;GO:1901565//organonitrogen compound catabolic process;GO:0016054//organic acid catabolic process;GO:00442…
30515205	30515205	XM_019475323.1	Known_gene	1	1023134	1024411	NC_032091.1	-	1278	804	184.97	222.95	790.35	392.41	408.04	299.1	399.423	366.516	0.0499523	0.962074	0.913856	-1.08507	4.4093e-149	6.85908e-150	0.953781	1.51579e-239	1.15937e-240	-0.423908	1.84928e-19	6.72778e-20	K13199//plasminogen activator inhibitor 1 RNA-binding protein	XP_019330868.1|2.8e-148|hypothetical protein CAALFM_C304810CA [Candida albicans SC5314]	GO:0003723//RNA binding;GO:0005488//binding;GO:0003676//nucleic acid binding;GO:1901363//heterocyclic compound binding;GO:0097159//organic cyclic compound binding;
3642321	3642321	XM_710944.2	Known_gene	1	1598697	1600199	NC_032090.1	+	1503	1503	1.16	1.95	0.47	2.99	4.55	0.16	1.193	2.566	-0.734775	0.529765	0.290274	-1.36602	0.000148457	0.000103115	-3.27513	1.34117e-15	6.51322e-16	3.60733	2.0677e-08	1.06217e-08	K00485//dimethylaniline monooxygenase (N-oxide forming) [EC:1.14.13.8]	XP_716037.2|3.3e-291|hypothetical protein CAALFM_C207840WA [Candida albicans SC5314]	GO:0016709//oxidoreductase activity, acting on paired donors, with incorporation or reduction of molecular oxygen, NAD(P)H as one donor, and incorporation of one atom of oxygen;GO:1901265//nucleoside phosphate binding;GO:0016491//oxidoreductase activity;GO:0043168//anion binding;GO:0050660//flavin adenine dinucleotide binding;GO:0004497//monooxygenase activity;GO:0000166//nucleotide binding;GO:00…
3642038	3642038	XM_711222.2	Known_gene	1	2657594	2658760	NC_032089.1	-	1167	1167	3.97	5.38	22.91	5.68	2.92	1.24	10.753	3.28	1.30827	0.126889	0.0283056	-0.516752	0.049493	0.0406502	2.97194	3.90371e-53	9.85054e-54	2.11727	7.07936e-10	3.42726e-10	NA	XP_716315.1|2.3e-220|hypothetical protein CAALFM_C112180CA [Candida albicans SC5314]	NA
3639045	DRS1	XM_714302.1	Known_gene	1	2240734	2242575	NC_032096.1	+	1842	1842	182.43	214.95	186.25	251.18	206.65	218.55	194.543	225.46	-0.188645	0.72505	0.517324	-0.461379	3.79526e-56	1.05177e-56	-0.149949	3.98751e-06	2.62704e-06	-0.0239623	0.760884	0.735312	K13181//ATP-dependent RNA helicase DDX27 [EC:3.6.4.13]	XP_719395.1|0.0e+00|putative ATP-dependent RNA helicase [Candida albicans SC5314]	GO:0035690//cellular response to drug;GO:0070887//cellular response to chemical stimulus;GO:0022613//ribonucleoprotein complex biogenesis;GO:0051716//cellular response to stimulus;GO:0009987//cellular process;GO:0044085//cellular component biogenesis;GO:0071840//cellular component organization or biogenesis;GO:0050896//response to stimulus;GO:0042221//response to chemical;GO:0042254//ribosome bio…
3637743	MSW1	XM_715513.1	Known_gene	1	621344	622543	NC_032093.1	+	1200	1200	81.27	99.23	110.14	70.22	75.8	77.68	96.88	74.566	0.368832	0.410298	0.188404	0.210841	0.000970691	0.000702662	0.539069	4.51594e-21	1.94348e-21	0.353233	1.4366e-10	6.76898e-11	K01867//tryptophanyl-tRNA synthetase [EC:6.1.1.2]+ko00970//Aminoacyl-tRNA biosynthesis	XP_720606.1|7.2e-225|tryptophan--tRNA ligase [Candida albicans SC5314]	GO:0006807//nitrogen compound metabolic process;GO:1901576//organic substance biosynthetic process;GO:0044267//cellular protein metabolic process;GO:0043170//macromolecule metabolic process;GO:0043043//peptide biosynthetic process;GO:0006139//nucleobase-containing compound metabolic process;GO:0006436//tryptophanyl-tRNA aminoacylation;GO:0010467//gene expression;GO:0044238//primary metabolic proc…
3638425	SEC13	XM_714918.2	Known_gene	1	674583	675479	NC_032091.1	+	897	897	69.8	42.14	122.72	53.45	70.54	54.66	78.22	59.55	0.332984	0.623628	0.391906	0.385037	4.03168e-06	2.63288e-06	0.798857	1.03868e-32	3.59758e-33	-0.375295	0.000313727	0.000200488	K14004//protein transport protein SEC13+ko04141//Protein processing in endoplasmic reticulum+ko03013//RNA transport	XP_720011.2|6.0e-176|GTPase-activating protein [Candida albicans SC5314]	GO:0019941//modification-dependent protein catabolic process;GO:2001141//regulation of RNA biosynthetic process;GO:0044237//cellular metabolic process;GO:0051028//mRNA transport;GO:0030433//ubiquitin-dependent ERAD pathway;GO:0010033//response to organic substance;GO:0051171//regulation of nitrogen compound metabolic process;GO:0071704//organic substance metabolic process;GO:0010243//response to …
3644722	3644722	BGI_novel_T000009,XM_019475092.1	Known_gene	2	879636	880616	NC_032089.1	+	981	834	90.98	68.85	123.24	47.06	50	77	94.356	58.02	0.661246	0.191014	0.0533263	0.951048	4.49634e-30	1.70382e-30	1.30147	5.14813e-65	1.14689e-65	-0.161402	0.130672	0.108736	K06691//26S proteasome regulatory subunit N13+ko03050//Proteasome;K06691//26S proteasome regulatory subunit N13+ko03050//Proteasome	XP_019330637.1|2.5e-155|proteasome regulatory particle lid subunit [Candida albicans SC5314]	GO:0006508//proteolysis;GO:0008152//metabolic process;GO:0030163//protein catabolic process;GO:0044238//primary metabolic process;GO:0006511//ubiquitin-dependent protein catabolic process;GO:1901565//organonitrogen compound catabolic process;GO:0044260//cellular macromolecule metabolic process;GO:0044265//cellular macromolecule catabolic process;GO:0051603//proteolysis involved in cellular protei…
3647483	3647483	XM_705822.1	Known_gene	1	1193133	1194662	NC_032090.1	-	1530	1530	10.84	21.02	31.09	29.49	25	35.08	20.983	29.856	-0.492316	0.434189	0.207951	-1.44386	7.61288e-38	2.56992e-38	0.314523	0.000582863	0.000431696	-0.738886	4.94349e-15	2.03106e-15	K14764//protein SHQ1	XP_710914.1|9.6e-299|Hsp90 cochaperone [Candida albicans SC5314]	GO:0044085//cellular component biogenesis;GO:0022613//ribonucleoprotein complex biogenesis;GO:0009987//cellular process;GO:0071840//cellular component organization or biogenesis;GO:0016043//cellular component organization;GO:0065003//protein-containing complex assembly;GO:0034622//cellular protein-containing complex assembly;GO:0000491//small nucleolar ribonucleoprotein complex assembly;GO:002261…
3641775	3641775	XM_711454.2	Known_gene	1	1217919	1218905	NC_032092.1	-	987	987	0.09	0.46	2.68	2.59	2.16	0.84	1.076	1.863	-0.594887	0.636535	0.404895	-4.84688	4.21136e-08	2.5436e-08	0.311202	0.455421	0.427204	-0.868755	0.340597	0.302766	NA	XP_716547.1|3.9e-176|hypothetical protein CAALFM_C405580CA [Candida albicans SC5314]	NA
3639852	3639852	XM_713424.2	Known_gene	1	193060	194184	NC_032091.1	-	1125	1125	11.34	20.06	27.75	11.18	8.33	13.8	19.716	11.103	0.755005	0.20399	0.0593599	0.0205005	0.916548	0.904424	1.7361	1.38308e-32	4.8112e-33	0.539653	6.56006e-05	4.02136e-05	K01802//peptidylprolyl isomerase [EC:5.2.1.8]	XP_718517.2|2.1e-218|peptidylprolyl isomerase [Candida albicans SC5314]	GO:0006457//protein folding;GO:0009987//cellular process;GO:0042026//protein refolding;GO:0005737//cytoplasm;GO:0110165//cellular anatomical entity;GO:0005622//intracellular;GO:0005829//cytosol;GO:0140096//catalytic activity, acting on a protein;GO:0008144//drug binding;GO:0005488//binding;GO:0016859//cis-trans isomerase activity;GO:0051082//unfolded protein binding;GO:0044877//protein-containing…
3637952	YOX1	XM_715218.1	Known_gene	1	205033	206040	NC_032095.1	-	1008	1008	0.52	1.07	4.94	4.29	2.37	1.63	2.176	2.763	-0.324643	0.796944	0.617477	-3.04439	1.19625e-09	6.8486e-10	1.05962	0.00151203	0.00114539	-0.607261	0.318593	0.281278	K12411//homeobox protein YOX1/YHP1	XP_720311.1|1.4e-184|Yox1p [Candida albicans SC5314]	GO:0051172//negative regulation of nitrogen compound metabolic process;GO:0060255//regulation of macromolecule metabolic process;GO:1902679//negative regulation of RNA biosynthetic process;GO:1903506//regulation of nucleic acid-templated transcription;GO:0051171//regulation of nitrogen compound metabolic process;GO:0045934//negative regulation of nucleobase-containing compound metabolic process;G…
3645117	3645117	XM_708148.1	Known_gene	1	714284	715111	NC_032096.1	+	828	828	28.37	29.54	21.67	58	42.22	43.47	26.526	47.896	-0.767523	0.1315	0.0298157	-1.03169	2.90744e-22	1.25996e-22	-0.962227	5.08717e-14	2.58946e-14	-0.55735	5.58906e-06	3.22796e-06	K15450//tRNA wybutosine-synthesizing protein 3 [EC:2.1.1.282]	XP_713241.1|3.2e-155|tRNA methyltransferase [Candida albicans SC5314]	GO:0044237//cellular metabolic process;GO:0009987//cellular process;GO:0001510//RNA methylation;GO:0016070//RNA metabolic process;GO:0090304//nucleic acid metabolic process;GO:1901576//organic substance biosynthetic process;GO:0031591//wybutosine biosynthetic process;GO:0008152//metabolic process;GO:1901137//carbohydrate derivative biosynthetic process;GO:0010467//gene expression;GO:0006399//tRNA…
3639672	BNR1	XM_713600.1	Known_gene	1	16909	21366	NC_032096.1	+	4458	4458	37.41	31.17	22.79	11.99	12.72	29.81	30.456	18.173	0.716117	0.271826	0.093535	1.64159	4.72965e-176	6.62088e-177	0.841302	3.8129e-37	1.21939e-37	0.0643618	0.177492	0.150381	K17971//BNI1-related protein 1+ko04011//MAPK signaling pathway - yeast	XP_718693.1|0.0e+00|Bnr1p [Candida albicans SC5314]	GO:0008064//regulation of actin polymerization or depolymerization;GO:1902903//regulation of supramolecular fiber organization;GO:0050789//regulation of biological process;GO:0061572//actin filament bundle organization;GO:0030833//regulation of actin filament polymerization;GO:0032535//regulation of cellular component size;GO:0000281//mitotic cytokinesis;GO:0007010//cytoskeleton organization;GO:0…
3638855	3638855	XM_714426.1	Known_gene	1	87920	89629	NC_032090.1	+	1710	1710	1.34	1.2	2.31	4.96	2.74	3.24	1.616	3.646	-1.06517	0.107047	0.0217586	-1.88811	1.95225e-11	1.06929e-11	-0.246283	0.434418	0.406052	-1.43296	1.48219e-05	8.77458e-06	K19564//choline transport protein	XP_719519.1|0.0e+00|hypothetical protein CAALFM_C200550WA [Candida albicans SC5314]	GO:0110165//cellular anatomical entity;GO:0016020//membrane;GO:0031224//intrinsic component of membrane;GO:0016021//integral component of membrane;GO:0022857//transmembrane transporter activity;GO:0005215//transporter activity;
3635256	RAX1	XM_718024.1	Known_gene	1	939148	940800	NC_032091.1	+	1653	1653	276.69	209.36	225.39	219.58	273.62	299.67	237.146	264.29	-0.13295	0.832438	0.6685	0.333524	1.25882e-30	4.73006e-31	-0.27975	1.15917e-20	5.02734e-21	-0.517389	7.45011e-68	1.33954e-68	K12404//ADP-ribosylation factor-binding protein GGA	XP_723117.1|0.0e+00|Rax1p [Candida albicans SC5314]	GO:0008104//protein localization;GO:0051179//localization;GO:0033036//macromolecule localization;GO:0016021//integral component of membrane;GO:0031224//intrinsic component of membrane;GO:0110165//cellular anatomical entity;GO:0071944//cell periphery;GO:0005886//plasma membrane;GO:0016020//membrane;
3645573	OSM1	XM_707718.1	Known_gene	1	1165370	1166881	NC_032090.1	+	1512	1512	22.13	19.98	48.39	50.79	36.99	34.92	30.166	40.9	-0.443951	0.480712	0.244897	-1.19854	6.78978e-48	2.03284e-48	0.387574	1.85057e-07	1.15892e-07	-0.805497	5.22172e-17	2.02516e-17	K18561//FAD-dependent fumarate reductase [EC:1.3.8.-]	XP_712811.1|1.1e-286|Osm1p [Candida albicans SC5314]	GO:0016628//oxidoreductase activity, acting on the CH-CH group of donors, NAD or NADP as acceptor;GO:0016627//oxidoreductase activity, acting on the CH-CH group of donors;GO:0000104//succinate dehydrogenase activity;GO:0003824//catalytic activity;GO:0016491//oxidoreductase activity;
3636579	3636579	XM_716626.1	Known_gene	1	446602	447222	NC_032091.1	-	621	621	148.36	186.47	235.03	265.09	218.16	240.48	189.953	241.243	-0.321716	0.512879	0.273657	-0.83738	2.78354e-48	8.29656e-49	0.107458	0.0285371	0.0235474	-0.366973	1.55362e-08	7.9443e-09	K14817//60S ribosomal subunit assembly/export protein LOC1	XP_721719.1|4.9e-108|hypothetical protein CAALFM_C302040CA [Candida albicans SC5314]	GO:0080090//regulation of primary metabolic process;GO:0010629//negative regulation of gene expression;GO:0017148//negative regulation of translation;GO:0051169//nuclear transport;GO:0032268//regulation of cellular protein metabolic process;GO:0008298//intracellular mRNA localization;GO:0010556//regulation of macromolecule biosynthetic process;GO:0050658//RNA transport;GO:0031326//regulation of c…
3635138	WSC1	XM_717990.2	Known_gene	1	883024	884100	NC_032091.1	+	1077	1077	158.95	187.86	180.97	66.48	82.18	98.7	175.926	82.453	1.06273	0.00708113	0.000505711	1.25758	1.12843e-108	2.1654e-109	1.13889	9.37465e-104	1.47164e-104	0.928536	2.41767e-83	3.82294e-84	K11244//cell wall integrity and stress response component+ko04011//MAPK signaling pathway - yeast+ko04139//Mitophagy - yeast	SCU91441.1|4.6e-29|LAFA_0F03774g1_1 [Lachancea sp. CBS 6924]	GO:0031224//intrinsic component of membrane;GO:0016021//integral component of membrane;GO:0110165//cellular anatomical entity;GO:0016020//membrane;
3646706	3646706	XM_706604.2	Known_gene	1	1228646	1229050	NC_032096.1	-	405	405	63.25	27.05	102.83	14.78	32.91	26.58	64.376	24.756	1.20284	0.0713283	0.0115632	2.09742	3.30862e-26	1.34073e-26	1.64366	2.43916e-30	8.84338e-31	0.0252875	0.609483	0.574456	NA	XP_711696.1|3.2e-76|hypothetical protein CAALFM_CR05800CA [Candida albicans SC5314]	NA
3642924	3642924	XM_710352.1	Known_gene	1	1498921	1500297	NC_032092.1	-	1377	1377	120.48	71.32	97.59	291.4	199.57	181.78	96.463	224.25	-1.13538	0.0143792	0.00126151	-1.27421	6.53073e-266	6.88942e-267	-1.03209	9.10384e-124	1.23604e-124	-1.34981	1.26579e-174	1.21666e-175	NA	XP_715445.1|6.3e-257|Imp2'p [Candida albicans SC5314]	NA
3648092	3648092	XM_705216.1	Known_gene	1	697717	698832	NC_032092.1	+	1116	1116	15.39	16.89	55.44	17.63	24.16	29.82	29.24	23.87	0.209957	0.821244	0.648906	-0.196039	0.177804	0.155742	1.19831	7.76097e-37	2.49108e-37	-0.820111	5.63282e-11	2.61906e-11	NA	XP_710308.1|1.4e-209|hypothetical protein CAALFM_C403320WA [Candida albicans SC5314]	GO:0007007//inner mitochondrial membrane organization;GO:0007005//mitochondrion organization;GO:0016043//cellular component organization;GO:0071840//cellular component organization or biogenesis;GO:0007006//mitochondrial membrane organization;GO:0009987//cellular process;GO:0006996//organelle organization;GO:0061024//membrane organization;GO:0016020//membrane;GO:0031975//envelope;GO:0031224//intr…
3634842	3634842	XM_718436.1	Known_gene	1	2142636	2144831	NC_032089.1	-	2196	2196	910.36	820.84	385.03	338.35	490.33	502.23	705.41	443.636	0.65719	0.305057	0.113298	1.42792	0	0	-0.348782	1.4958e-73	3.06504e-74	0.708753	0	0	NA	XP_723529.1|0.0e+00|putative ferric-chelate reductase [Candida albicans SC5314]	GO:0000041//transition metal ion transport;GO:0055065//metal ion homeostasis;GO:0051234//establishment of localization;GO:0050801//ion homeostasis;GO:0051649//establishment of localization in cell;GO:0008152//metabolic process;GO:0055080//cation homeostasis;GO:0006810//transport;GO:0006811//ion transport;GO:0055114//oxidation-reduction process;GO:0033212//iron import into cell;GO:0009987//cellula…
3646494	EAF6	XM_706791.2	Known_gene	1	1866411	1867046	NC_032089.1	+	636	636	49.27	48.38	55.37	51.43	57.7	76.39	51.006	61.84	-0.243699	0.665029	0.441064	-0.0619007	0.600741	0.57177	-0.0594668	0.704883	0.682046	-0.658973	3.27368e-09	1.62281e-09	K11344//chromatin modification-related protein EAF6	XP_711884.1|1.5e-112|Eaf6p [Candida albicans SC5314]	GO:0008152//metabolic process;GO:0051716//cellular response to stimulus;GO:0036211//protein modification process;GO:0071704//organic substance metabolic process;GO:0043967//histone H4 acetylation;GO:0006725//cellular aromatic compound metabolic process;GO:0043968//histone H2A acetylation;GO:0006475//internal protein amino acid acetylation;GO:0018205//peptidyl-lysine modification;GO:0050896//respo…
3643678	YST1	XM_019475329.1	Known_gene	1	1193027	1194203	NC_032091.1	-	1177	786	224.14	337.27	1325.97	1206.9	1189.45	690.1	629.126	1028.82	-0.687576	0.392339	0.175233	-2.42883	0	0	0.156754	5.72494e-17	2.67986e-17	-1.0329	1.46933e-217	1.21724e-218	K02998//small subunit ribosomal protein SAe+ko03010//Ribosome	XP_019330874.1|2.3e-147|ribosomal 40S subunit protein S0A [Candida albicans SC5314]	GO:0016043//cellular component organization;GO:0042255//ribosome assembly;GO:0006518//peptide metabolic process;GO:0006807//nitrogen compound metabolic process;GO:0044260//cellular macromolecule metabolic process;GO:0043043//peptide biosynthetic process;GO:0043933//protein-containing complex subunit organization;GO:0034645//cellular macromolecule biosynthetic process;GO:0006996//organelle organiz…
3642789	CEK1	XM_710449.2	Known_gene	1	1437628	1438893	NC_032092.1	-	1266	1266	28.2	28.37	86.65	56.5	36.57	70.1	47.74	54.39	-0.212977	0.805936	0.628032	-1.00256	3.29225e-33	1.18029e-33	1.24454	3.96557e-69	8.50994e-70	-1.30505	7.08232e-59	1.40432e-59	K04371//mitogen-activated protein kinase 1/3 [EC:2.7.11.24]+ko04011//MAPK signaling pathway - yeast	KHC86273.1|5.2e-242|extracellular signal-regulated kinase 1 [Candida albicans SC5314]	GO:0010033//response to organic substance;GO:0048522//positive regulation of cellular process;GO:0070887//cellular response to chemical stimulus;GO:0048584//positive regulation of response to stimulus;GO:0043902//positive regulation of multi-organism process;GO:1900436//positive regulation of filamentous growth of a population of unicellular organisms in response to starvation;GO:0032101//regulat…
3638378	3638378	XM_714888.2	Known_gene	1	624195	624851	NC_032091.1	+	657	657	55.02	49.29	38.88	14.67	12.79	17.5	47.73	14.986	1.61382	0.000291173	9.6607e-06	1.90709	4.16094e-39	1.37816e-39	1.60401	5.84145e-22	2.4593e-22	1.49394	3.94059e-27	1.19919e-27	NA	XP_719981.2|8.7e-124|hypothetical protein CAALFM_C302910WA [Candida albicans SC5314]	NA
3639726	3639726	XM_713552.1	Known_gene	1	115600	116151	NC_032096.1	-	552	552	157.29	166.86	134.15	221.79	170.86	225.11	152.766	205.92	-0.36641	0.489396	0.252316	-0.495767	1.1087e-14	5.58806e-15	-0.348968	7.04862e-06	4.72262e-06	-0.431992	3.34831e-09	1.66149e-09	K14560//U3 small nucleolar ribonucleoprotein protein IMP3+ko03008//Ribosome biogenesis in eukaryotes	XP_718645.1|1.9e-100|snoRNA-binding rRNA-processing protein [Candida albicans SC5314]	GO:0006807//nitrogen compound metabolic process;GO:0022613//ribonucleoprotein complex biogenesis;GO:0090304//nucleic acid metabolic process;GO:0043170//macromolecule metabolic process;GO:0006396//RNA processing;GO:0071840//cellular component organization or biogenesis;GO:0010467//gene expression;GO:0016070//RNA metabolic process;GO:0034641//cellular nitrogen compound metabolic process;GO:0006725/…
3639881	POL32	XM_713394.2	Known_gene	1	1216759	1217970	NC_032089.1	+	1212	1212	83.31	191.25	54.98	112.47	80.06	142.78	109.846	111.77	0.0372749	0.97286	0.937112	-0.432979	3.98973e-15	1.99086e-15	-0.542175	3.65777e-15	1.7959e-15	0.421666	6.37937e-26	1.98531e-26	K03504//DNA polymerase delta subunit 3+ko03430//Mismatch repair+ko03440//Homologous recombination+ko03420//Nucleotide excision repair+ko03030//DNA replication+ko03410//Base excision repair	XP_718487.2|4.1e-228|DNA polymerase delta subunit [Candida albicans SC5314]	GO:0071704//organic substance metabolic process;GO:1901362//organic cyclic compound biosynthetic process;GO:1901576//organic substance biosynthetic process;GO:0043170//macromolecule metabolic process;GO:0006974//cellular response to DNA damage stimulus;GO:0046483//heterocycle metabolic process;GO:0070914//UV-damage excision repair;GO:0009058//biosynthetic process;GO:0044271//cellular nitrogen com…
3637365	3637365	XM_715854.2	Known_gene	1	837207	837875	NC_032090.1	-	669	669	0	1.02	1.84	0	1.4	0	0.953	0.466	0.314003	0.827693	0.657903	NA	NA	NA	0.394279	0.531342	0.503302	6.67243	0.00688471	0.00495616	NA	XP_720947.1|9.8e-123|hypothetical protein CAALFM_C204000CA [Candida albicans SC5314]	NA
3647315	BUD5	XM_705979.2	Known_gene	1	1479588	1484264	NC_032096.1	+	4677	4677	58.89	108.64	21.42	31.58	62.56	89.71	62.983	61.283	0.0896743	0.938256	0.864806	0.899012	3.2395e-113	6.10254e-114	-1.54628	9.48514e-269	6.44698e-270	0.276215	3.5407e-26	1.09654e-26	K11397//chromatin modification-related protein VID21	XP_711071.2|0.0e+00|Ras family guanine nucleotide exchange factor [Candida albicans SC5314]	GO:0035556//intracellular signal transduction;GO:0009987//cellular process;GO:0051716//cellular response to stimulus;GO:0050789//regulation of biological process;GO:0007154//cell communication;GO:0050794//regulation of cellular process;GO:0023052//signaling;GO:0065007//biological regulation;GO:0007165//signal transduction;GO:0007264//small GTPase mediated signal transduction;GO:0050896//response …
3634926	3634926	XM_718343.2	Known_gene	1	1936147	1938249	NC_032089.1	-	2103	2103	20.59	28.42	33.71	11.75	13.85	16.9	27.573	14.166	0.909534	0.0398837	0.00499294	0.809283	1.57357e-15	7.7677e-16	1.28329	1.57079e-49	4.19192e-50	0.749883	6.64054e-19	2.45268e-19	NA	XP_723436.2|0.0e+00|hypothetical protein CAALFM_C108910CA [Candida albicans SC5314]	NA
3643189	IFF3	XM_710044.2	Known_gene	1	804770	807595	NC_032096.1	+	2826	2826	2.76	1.4	3.62	3.33	2.95	2.51	2.593	2.93	-0.18686	0.830016	0.663367	-0.270854	0.175397	0.153576	0.295275	0.129223	0.112843	-0.842261	0.00103087	0.000685454	K01186//sialidase-1 [EC:3.2.1.18]+ko00600//Sphingolipid metabolism+ko00511//Other glycan degradation;K19851//flocculation protein FLO11+ko04011//MAPK signaling pathway - yeast	XP_715137.2|0.0e+00|Iff3p [Candida albicans SC5314]	GO:0009405//pathogenesis;GO:0044419//interspecies interaction between organisms;GO:0005618//cell wall;GO:0031224//intrinsic component of membrane;GO:0009986//cell surface;GO:0030312//external encapsulating structure;GO:0110165//cellular anatomical entity;GO:0071944//cell periphery;GO:0031225//anchored component of membrane;GO:0016020//membrane;GO:0005576//extracellular region;GO:0009277//fungal-t…
3643820	3643820	XM_709436.1	Known_gene	1	2038151	2039194	NC_032090.1	-	1044	1044	161.2	99.06	130.32	182.72	140.02	152.69	130.193	158.476	-0.253692	0.661002	0.434932	-0.180783	7.01671e-05	4.81488e-05	-0.103574	0.0743749	0.0635068	-0.624231	4.09923e-29	1.20545e-29	K01057//6-phosphogluconolactonase [EC:3.1.1.31]+ko00030//Pentose phosphate pathway+ko01100//Metabolic pathways+ko01130//Biosynthesis of antibiotics+ko01110//Biosynthesis of secondary metabolites+ko01200//Carbon metabolism	XP_714529.1|2.2e-198|hypothetical protein CAALFM_C209970CA [Candida albicans SC5314]	GO:1901135//carbohydrate derivative metabolic process;GO:0009051//pentose-phosphate shunt, oxidative branch;GO:0005975//carbohydrate metabolic process;GO:0009987//cellular process;GO:0071704//organic substance metabolic process;GO:0019637//organophosphate metabolic process;GO:0006793//phosphorus metabolic process;GO:0051156//glucose 6-phosphate metabolic process;GO:0006796//phosphate-containing c…
3636416	3636416	XM_716793.1	Known_gene	1	1065586	1066695	NC_032093.1	-	1110	1110	20.15	23.73	55.87	46.84	38.51	38.84	33.25	41.396	-0.330573	0.632099	0.401126	-1.21696	2.04483e-32	7.46438e-33	0.536841	1.8559e-10	1.05069e-10	-0.710831	5.42724e-11	2.52256e-11	K06944//uncharacterized protein	XP_721886.1|3.3e-208|hypothetical protein CAALFM_C504900CA [Candida albicans SC5314]	GO:0034645//cellular macromolecule biosynthetic process;GO:0048584//positive regulation of response to stimulus;GO:0044237//cellular metabolic process;GO:0044267//cellular protein metabolic process;GO:1901576//organic substance biosynthetic process;GO:0043604//amide biosynthetic process;GO:0006412//translation;GO:0032103//positive regulation of response to external stimulus;GO:0032101//regulation…
3647054	3647054	XM_706243.2	Known_gene	1	315377	317962	NC_032093.1	-	2586	2586	2.8	3.69	11.31	10.67	8.01	5.12	5.933	7.933	-0.429932	0.615275	0.379022	-1.93006	1.74447e-36	5.9853e-37	0.497725	2.62488e-05	1.80954e-05	-0.472523	0.00974508	0.00712008	K20179//vacuolar protein sorting-associated protein 11+ko04138//Autophagy - yeast	XP_711335.2|0.0e+00|hypothetical protein CAALFM_C501410CA [Candida albicans SC5314]	GO:0043227//membrane-bounded organelle;GO:0043226//organelle;GO:0030176//integral component of endoplasmic reticulum membrane;GO:0031224//intrinsic component of membrane;GO:0031301//integral component of organelle membrane;GO:0012505//endomembrane system;GO:0031090//organelle membrane;GO:0042175//nuclear outer membrane-endoplasmic reticulum membrane network;GO:0098796//membrane protein complex;GO…
3643182	3643182	XM_710062.2	Known_gene	1	801143	803746	NC_032096.1	-	2604	2604	37.29	31.03	97.11	35.48	30.98	25.66	55.143	30.706	0.724701	0.243493	0.0787998	0.0717828	0.250366	0.222906	1.64828	1.66509e-254	1.19292e-255	0.274143	3.29062e-05	1.98455e-05	NA	XP_715155.2|0.0e+00|hypothetical protein CAALFM_CR03620CA [Candida albicans SC5314]	GO:0006996//organelle organization;GO:0071840//cellular component organization or biogenesis;GO:0007005//mitochondrion organization;GO:0009987//cellular process;GO:0016043//cellular component organization;GO:0000002//mitochondrial genome maintenance;GO:0031975//envelope;GO:0043231//intracellular membrane-bounded organelle;GO:0032592//integral component of mitochondrial membrane;GO:0031301//integr…
3636980	3636980	XM_716298.2	Known_gene	1	369530	369886	NC_032095.1	+	357	357	45.22	22.04	9.06	4.09	19.5	17.7	25.44	13.763	0.777586	0.430991	0.204769	3.46679	2.10225e-26	8.49066e-27	-1.10589	0.00224101	0.00171519	0.316375	0.128727	0.107074	NA	XP_721391.2|4.4e-69|hypothetical protein CAALFM_C701690WA [Candida albicans SC5314]	GO:0006810//transport;GO:0072655//establishment of protein localization to mitochondrion;GO:0017038//protein import;GO:0070585//protein localization to mitochondrion;GO:0051649//establishment of localization in cell;GO:0042886//amide transport;GO:0072594//establishment of protein localization to organelle;GO:0006996//organelle organization;GO:0070727//cellular macromolecule localization;GO:004474…
3637945	3637945	XM_715241.1	Known_gene	1	148191	150485	NC_032095.1	+	2295	2295	58.06	77.12	43.32	69.95	84.53	72.7	59.5	75.726	-0.298166	0.636927	0.406416	-0.268779	2.24031e-08	1.34261e-08	-0.96443	9.39002e-83	1.75004e-83	0.0851497	0.0357573	0.0277298	K06100//symplekin+ko03015//mRNA surveillance pathway	XP_720334.1|0.0e+00|RNA-processing protein [Candida albicans SC5314]	GO:0042493//response to drug;GO:0042221//response to chemical;GO:0050896//response to stimulus;
3643798	3643798	XM_709472.2	Known_gene	1	1967507	1968607	NC_032090.1	+	1101	1101	175.54	133.89	78.03	93.73	103.2	94.76	129.153	97.23	0.423609	0.520696	0.280761	0.905217	1.76457e-72	4.243e-73	-0.403342	1.68488e-10	9.52456e-11	0.498698	2.94906e-22	1.0035e-22	K15115//solute carrier family 25 (mitochondrial folate transporter), member 32	XP_714565.2|1.7e-209|NAD+ transporter [Candida albicans SC5314]	GO:0071702//organic substance transport;GO:0006810//transport;GO:0006862//nucleotide transport;GO:0051234//establishment of localization;GO:0051179//localization;GO:0071705//nitrogen compound transport;GO:0009987//cellular process;GO:1901679//nucleotide transmembrane transport;GO:0055085//transmembrane transport;GO:0015748//organophosphate ester transport;GO:0015931//nucleobase-containing compoun…
3637990	3637990	XM_715272.1	Known_gene	1	75620	76342	NC_032095.1	+	723	723	14.03	11.23	11.69	7.41	3.79	12.28	12.316	7.826	0.612767	0.423634	0.198806	0.92097	8.30146e-05	5.71594e-05	1.62501	2.15261e-08	1.30854e-08	-0.128953	0.709138	0.679466	K12386//cystinosin	KGR09719.1|1.4e-135|hypothetical protein MG9_05006 [Candida albicans P37037]	GO:0031224//intrinsic component of membrane;GO:0016020//membrane;GO:0110165//cellular anatomical entity;GO:0016021//integral component of membrane;
3637026	GRX1	XM_716255.2	Known_gene	1	460994	461365	NC_032095.1	+	372	372	1.65	1.28	7.06	9.57	13.33	3.68	3.33	8.86	-1.07902	0.290103	0.104202	-2.53605	2.96916e-05	2.00612e-05	-0.916937	0.0274107	0.0225584	-1.52356	0.0999633	0.0815866	K03676//glutaredoxin 3	BAE44724.1|2.1e-66|hypothetical protein [Candida albicans]	GO:0042592//homeostatic process;GO:0050896//response to stimulus;GO:0006950//response to stress;GO:0065007//biological regulation;GO:0033554//cellular response to stress;GO:0042221//response to chemical;GO:0050789//regulation of biological process;GO:0019725//cellular homeostasis;GO:0050794//regulation of cellular process;GO:0062197//cellular response to chemical stress;GO:0009987//cellular proce…
3643223	3643223	XM_710052.2	Known_gene	1	825518	829063	NC_032096.1	-	3546	3546	60.54	45.06	33.66	40.25	51.79	76.82	46.42	56.286	-0.224283	0.759409	0.564595	0.5889	1.33383e-42	4.257e-43	-0.621638	1.9509e-38	6.1218e-39	-0.769635	2.52468e-82	4.06426e-83	K11682//SWR1-complex protein 3;K17976//mitochondrial MYO2 receptor-related protein 1	XP_715145.2|0.0e+00|hypothetical protein CAALFM_CR03700CA [Candida albicans SC5314]	NA
3640518	ESA1	XM_712695.1	Known_gene	1	70068	71693	NC_032091.1	+	1626	1626	203.27	208.55	90.86	140.45	152.01	170.56	167.56	154.34	0.15687	0.850823	0.699217	0.533341	9.91498e-52	2.85562e-52	-0.742449	1.55382e-65	3.4486e-66	0.290114	8.42292e-20	3.03882e-20	K11304//histone acetyltransferase HTATIP [EC:2.3.1.48]	XP_717788.1|0.0e+00|NuA4 histone acetyltransferase complex catalytic subunit [Candida albicans SC5314]	GO:0009987//cellular process;GO:0044260//cellular macromolecule metabolic process;GO:0030447//filamentous growth;GO:0010629//negative regulation of gene expression;GO:0045944//positive regulation of transcription by RNA polymerase II;GO:0071840//cellular component organization or biogenesis;GO:0043412//macromolecule modification;GO:0043967//histone H4 acetylation;GO:0031323//regulation of cellula…
3640511	ERG4	XM_712663.2	Known_gene	1	143568	144977	NC_032091.1	+	1410	1410	13.89	8.72	38.62	19.27	10.93	4.35	20.41	11.516	0.641314	0.472395	0.236315	-0.47231	0.000152639	0.000106096	1.82105	4.21064e-61	9.74608e-62	1.00331	4.68547e-07	2.55886e-07	K00223//Delta24(24(1))-sterol reductase [EC:1.3.1.71]+ko01100//Metabolic pathways+ko01130//Biosynthesis of antibiotics+ko00100//Steroid biosynthesis	XP_717756.2|8.9e-291|delta(24(24(1)))-sterol reductase [Candida albicans SC5314]	GO:1901360//organic cyclic compound metabolic process;GO:0016128//phytosteroid metabolic process;GO:0009058//biosynthetic process;GO:0008610//lipid biosynthetic process;GO:0044108//cellular alcohol biosynthetic process;GO:0016129//phytosteroid biosynthetic process;GO:0006629//lipid metabolic process;GO:1901617//organic hydroxy compound biosynthetic process;GO:0044237//cellular metabolic process;G…
3637909	3637909	XM_715368.2	Known_gene	1	595171	595815	NC_032092.1	+	645	645	285.16	252.74	203.33	334.8	310.5	264.97	247.076	303.423	-0.243475	0.679907	0.458117	-0.231528	2.93593e-07	1.8357e-07	-0.61077	1.34321e-31	4.7802e-32	-0.068175	0.697131	0.66679	K16833//protein phosphatase inhibitor 2	XP_720461.2|1.2e-120|hypothetical protein CAALFM_C402860WA [Candida albicans SC5314]	GO:0050794//regulation of cellular process;GO:0051246//regulation of protein metabolic process;GO:0035303//regulation of dephosphorylation;GO:0065009//regulation of molecular function;GO:0009966//regulation of signal transduction;GO:0031399//regulation of protein modification process;GO:0035304//regulation of protein dephosphorylation;GO:0048583//regulation of response to stimulus;GO:0019220//reg…
3644551	PSP1	XM_708711.2	Known_gene	1	2481346	2483355	NC_032089.1	-	2010	2010	355.61	292.37	415.04	394.7	489.78	396.8	354.34	427.093	-0.265093	0.598087	0.358932	-0.150461	1.22389e-12	6.49038e-13	-0.238883	5.54113e-33	1.90442e-33	-0.440617	1.18253e-82	1.89769e-83	NA	XP_713804.2|0.0e+00|Psp1p [Candida albicans SC5314]	GO:0110165//cellular anatomical entity;GO:0005622//intracellular;GO:0005737//cytoplasm;
3636140	MYO2	XM_717126.1	Known_gene	1	3025935	3030620	NC_032089.1	+	4686	4686	43.58	36.38	38.11	52.53	58.79	43.46	39.356	51.593	-0.36731	0.46809	0.232993	-0.269475	1.47179e-12	7.81488e-13	-0.625401	3.8096e-58	9.0723e-59	-0.256543	2.8531e-09	1.41097e-09	K10357//myosin V	XP_722219.1|0.0e+00|myosin 2 [Candida albicans SC5314]	GO:0040008//regulation of growth;GO:0007010//cytoskeleton organization;GO:0009408//response to heat;GO:0051650//establishment of vesicle localization;GO:0009266//response to temperature stimulus;GO:0044182//filamentous growth of a population of unicellular organisms;GO:0006950//response to stress;GO:0051649//establishment of localization in cell;GO:0006997//nucleus organization;GO:0051647//nucleu…
3643117	3643117	XM_710140.1	Known_gene	1	868066	868530	NC_032095.1	-	465	465	54.01	30.66	64.8	53.05	31.04	45.29	49.823	43.126	0.200751	0.787813	0.603679	0.0258738	0.872891	0.857544	1.06187	6.37304e-13	3.35042e-13	-0.562835	0.00311053	0.00216028	NA	XP_715233.1|7.2e-80|hypothetical protein CAALFM_C703970CA [Candida albicans SC5314]	GO:0016192//vesicle-mediated transport;GO:0045324//late endosome to vacuole transport;GO:0051179//localization;GO:0032880//regulation of protein localization;GO:0046907//intracellular transport;GO:0048519//negative regulation of biological process;GO:0065007//biological regulation;GO:0032511//late endosome to vacuole transport via multivesicular body sorting pathway;GO:1903828//negative regulatio…
3641911	3641911	XM_711330.1	Known_gene	1	1911649	1912971	NC_032096.1	+	1323	1323	40.47	31.04	73.85	90.35	28.74	32.61	48.453	50.566	-0.0797517	0.938256	0.864556	-1.15867	6.07127e-69	1.49342e-69	1.36154	4.38428e-71	9.17418e-72	-0.0711859	0.612263	0.577282	K00249//acyl-CoA dehydrogenase [EC:1.3.8.7]+ko00410//beta-Alanine metabolism+ko00280//Valine, leucine and isoleucine degradation+ko01100//Metabolic pathways+ko01130//Biosynthesis of antibiotics+ko00640//Propanoate metabolism+ko01110//Biosynthesis of secondary metabolites+ko01212//Fatty acid metabolism+ko00071//Fatty acid degradation+ko01200//Carbon metabolism	XP_716423.1|3.0e-256|hypothetical protein CAALFM_CR08920WA [Candida albicans SC5314]	GO:0036094//small molecule binding;GO:0050660//flavin adenine dinucleotide binding;GO:0016491//oxidoreductase activity;GO:0097159//organic cyclic compound binding;GO:0043168//anion binding;GO:1901363//heterocyclic compound binding;GO:0043167//ion binding;GO:0005488//binding;GO:0000166//nucleotide binding;GO:0003824//catalytic activity;GO:1901265//nucleoside phosphate binding;GO:0016627//oxidoredu…
3638369	PAM17	XM_714846.2	Known_gene	1	547221	547778	NC_032091.1	+	558	558	195.93	188.45	295.57	92.24	135.85	147.29	226.65	125.126	0.818743	0.0730614	0.0120639	1.08687	9.4221e-48	2.82726e-48	1.12149	8.50123e-75	1.72495e-75	0.355522	1.00796e-09	4.90174e-10	K17806//mitochondrial import inner membrane translocase subunit TIM23	XP_719939.2|6.8e-101|Pam17p [Candida albicans SC5314]	GO:0006839//mitochondrial transport;GO:0051234//establishment of localization;GO:0071840//cellular component organization or biogenesis;GO:0045184//establishment of protein localization;GO:0015833//peptide transport;GO:0006605//protein targeting;GO:0051641//cellular localization;GO:0070727//cellular macromolecule localization;GO:0072594//establishment of protein localization to organelle;GO:00511…
3642791	3642791	XM_710451.2	Known_gene	1	1434027	1434701	NC_032092.1	-	675	675	83.9	57.44	70.88	21.77	26.92	51.84	70.74	33.51	1.02171	0.0699563	0.0112731	1.94633	2.67554e-62	6.9935e-63	1.3967	5.59978e-33	1.92551e-33	0.14799	0.0750554	0.0604126	K20312//TRAPP-associated protein TCA17	XP_715544.2|3.3e-126|hypothetical protein CAALFM_C406460CA, partial [Candida albicans SC5314]	GO:0051234//establishment of localization;GO:0006888//endoplasmic reticulum to Golgi vesicle-mediated transport;GO:0009987//cellular process;GO:0016192//vesicle-mediated transport;GO:0006810//transport;GO:0048193//Golgi vesicle transport;GO:0051649//establishment of localization in cell;GO:0046907//intracellular transport;GO:0051641//cellular localization;GO:0051179//localization;GO:0005737//cyto…
6335429	LYS1	XM_443225.2	Known_gene	1	1158925	1160073	NC_032092.1	+	1149	1149	175.15	177.27	126.16	31.51	27.57	22.31	159.526	27.13	2.44218	3.69775e-10	1.78516e-12	2.47471	0	0	2.19408	1.33181e-199	1.2166e-200	2.99019	0	0	K00290//saccharopine dehydrogenase (NAD+, L-lysine forming) [EC:1.5.1.7]+ko00310//Lysine degradation+ko00300//Lysine biosynthesis+ko01100//Metabolic pathways+ko01230//Biosynthesis of amino acids+ko01130//Biosynthesis of antibiotics+ko01110//Biosynthesis of secondary metabolites	P43065.1|3.1e-209|RecName: Full=Saccharopine dehydrogenase [NAD(+), L-lysine-forming]; Short=SDH; AltName: Full=Lysine--2-oxoglutarate reductase [Candida albicans SC5314]	GO:0009067//aspartate family amino acid biosynthetic process;GO:0019878//lysine biosynthetic process via aminoadipic acid;GO:0006807//nitrogen compound metabolic process;GO:0006082//organic acid metabolic process;GO:0006553//lysine metabolic process;GO:0009987//cellular process;GO:0008152//metabolic process;GO:0044283//small molecule biosynthetic process;GO:0009058//biosynthetic process;GO:004424…
3645561	3645561	XM_707706.1	Known_gene	1	1129692	1130708	NC_032090.1	+	1017	1017	19.81	14.16	27.96	35.61	24.08	29.32	20.643	29.67	-0.502808	0.366256	0.153648	-0.846054	4.02916e-13	2.11848e-13	0.215529	0.0689793	0.0587384	-1.05006	2.45675e-14	1.03042e-14	K17741//NADPH-dependent methylglyoxal reductase [EC:1.1.1.283]+ko04011//MAPK signaling pathway - yeast+ko00640//Propanoate metabolism+ko00620//Pyruvate metabolism	XP_712799.1|2.1e-185|hypothetical protein CAALFM_C205560WA [Candida albicans SC5314]	GO:0040007//growth;GO:0030447//filamentous growth;GO:0016614//oxidoreductase activity, acting on CH-OH group of donors;GO:0016491//oxidoreductase activity;GO:0016616//oxidoreductase activity, acting on the CH-OH group of donors, NAD or NADP as acceptor;GO:0003824//catalytic activity;
3638892	VPS24	XM_019475197.1	Known_gene	1	154508	155250	NC_032090.1	-	743	672	30.08	35.52	102.41	111.53	77.74	80.8	56.003	90.023	-0.664423	0.327048	0.126501	-1.89056	1.88395e-78	4.33132e-79	0.397628	8.89611e-07	5.71086e-07	-1.18572	2.65517e-27	8.06232e-28	K12193//charged multivesicular body protein 3+ko04144//Endocytosis	XP_019330742.1|2.8e-117|ESCRT-III subunit protein [Candida albicans SC5314]	GO:0045184//establishment of protein localization;GO:0008104//protein localization;GO:0046907//intracellular transport;GO:0016192//vesicle-mediated transport;GO:0033365//protein localization to organelle;GO:0033036//macromolecule localization;GO:0006605//protein targeting;GO:0015833//peptide transport;GO:0006886//intracellular protein transport;GO:0051234//establishment of localization;GO:0070727…
3646673	3646673	XM_706636.2	Known_gene	1	1641986	1645111	NC_032089.1	-	3126	3126	14.96	13.44	17.98	17.09	20.83	25.01	15.46	20.976	-0.423223	0.378053	0.162877	-0.192042	0.021142	0.0167805	-0.21227	0.00627315	0.00491334	-0.895972	2.73184e-31	7.74428e-32	K11824//AP-2 complex subunit alpha+ko04144//Endocytosis	XP_711728.2|0.0e+00|hypothetical protein CAALFM_C107590CA [Candida albicans SC5314]	GO:0051234//establishment of localization;GO:0070727//cellular macromolecule localization;GO:0006897//endocytosis;GO:0045184//establishment of protein localization;GO:0006886//intracellular protein transport;GO:0009987//cellular process;GO:0046907//intracellular transport;GO:0006810//transport;GO:0033036//macromolecule localization;GO:0016192//vesicle-mediated transport;GO:0042886//amide transpor…
3641113	3641113	XM_712111.2	Known_gene	1	1033241	1034341	NC_032092.1	+	1101	1101	39.82	39.07	124.57	61.02	55.79	41.19	67.82	52.666	0.277941	0.727524	0.522765	-0.615789	4.76296e-14	2.44608e-14	1.15888	1.04147e-75	2.10102e-76	-0.0762329	0.606009	0.570164	NA	XP_717204.2|8.4e-204|hypothetical protein CAALFM_C404800WA [Candida albicans SC5314]	GO:0031224//intrinsic component of membrane;GO:0043227//membrane-bounded organelle;GO:0012505//endomembrane system;GO:0016020//membrane;GO:0005789//endoplasmic reticulum membrane;GO:0110165//cellular anatomical entity;GO:0043226//organelle;GO:0042175//nuclear outer membrane-endoplasmic reticulum membrane network;GO:0031090//organelle membrane;GO:0016021//integral component of membrane;
3641214	JEN2	XM_712017.1	Known_gene	1	864733	866274	NC_032092.1	+	1542	1542	9.57	16.88	1.9	0.16	0.89	1.62	9.45	0.89	2.61334	0.00124678	5.60257e-05	5.90238	5.53942e-50	1.62602e-50	1.09412	0.0107967	0.00857536	3.38125	8.19894e-63	1.56925e-63	K08178//MFS transporter, SHS family, lactate transporter	XP_717110.1|6.5e-303|Jen2p [Candida albicans SC5314]	GO:0015718//monocarboxylic acid transport;GO:0006835//dicarboxylic acid transport;GO:1903825//organic acid transmembrane transport;GO:0015849//organic acid transport;GO:0035879//plasma membrane lactate transport;GO:0035873//lactate transmembrane transport;GO:0046942//carboxylic acid transport;GO:0098656//anion transmembrane transport;GO:0015850//organic hydroxy compound transport;GO:0051179//loca…
3641014	3641014	XM_712311.2	Known_gene	1	992082	993203	NC_032096.1	-	1122	1122	11.22	15.68	151.47	45.23	42.73	49.03	59.456	45.663	0.209264	0.869334	0.7291	-2.01121	3.01597e-64	7.72678e-65	1.82571	3.43359e-183	3.38886e-184	-1.64474	5.22511e-51	1.13089e-51	K01069//hydroxyacylglutathione hydrolase [EC:3.1.2.6]+ko00620//Pyruvate metabolism	XP_717404.2|1.2e-216|hypothetical protein CAALFM_CR04500CA [Candida albicans SC5314]	GO:0043167//ion binding;GO:0046872//metal ion binding;GO:0051213//dioxygenase activity;GO:0043169//cation binding;GO:0005488//binding;GO:0003824//catalytic activity;GO:0016491//oxidoreductase activity;
3643809	SSO2	XM_709457.1	Known_gene	1	1989824	1990711	NC_032090.1	+	888	888	123.11	102.36	144.89	76.46	102.34	126.17	123.453	101.656	0.273283	0.623216	0.390406	0.687171	1.80472e-25	7.3887e-26	0.501588	1.3844e-17	6.39258e-18	-0.301717	1.32203e-05	7.80202e-06	K08486//syntaxin 1B/2/3+ko04130//SNARE interactions in vesicular transport	XP_714550.1|1.1e-164|syntaxin [Candida albicans SC5314]	GO:0009987//cellular process;GO:0046903//secretion;GO:0015031//protein transport;GO:0044419//interspecies interaction between organisms;GO:0045184//establishment of protein localization;GO:0051179//localization;GO:0006996//organelle organization;GO:0002790//peptide secretion;GO:0033036//macromolecule localization;GO:0070727//cellular macromolecule localization;GO:0071705//nitrogen compound transp…
3638509	3638509	XM_714809.1	Known_gene	1	1585276	1587105	NC_032091.1	+	1830	1830	2.41	0.51	1.53	2.88	1.34	1.17	1.483	1.796	-0.21952	0.85889	0.710189	-0.257036	0.353484	0.322054	0.191299	0.610467	0.585694	-1.19794	0.02288	0.0173513	NA	XP_719902.1|0.0e+00|hypothetical protein CAALFM_C306940WA [Candida albicans SC5314]	GO:0090304//nucleic acid metabolic process;GO:0006807//nitrogen compound metabolic process;GO:0008152//metabolic process;GO:0006139//nucleobase-containing compound metabolic process;GO:0071704//organic substance metabolic process;GO:0015074//DNA integration;GO:0006725//cellular aromatic compound metabolic process;GO:0044238//primary metabolic process;GO:0034641//cellular nitrogen compound metabol…
3647716	ERG24	XM_705587.2	Known_gene	1	1913246	1914592	NC_032090.1	-	1347	1347	5.25	6.91	28.12	5.19	5.87	2.99	13.426	4.683	1.21739	0.111862	0.0235119	0.0165829	0.953408	0.945266	2.26016	3.52312e-56	8.53128e-57	1.20854	4.08407e-07	2.2263e-07	K00222//Delta14-sterol reductase [EC:1.3.1.70]+ko01100//Metabolic pathways+ko01130//Biosynthesis of antibiotics+ko01110//Biosynthesis of secondary metabolites+ko00100//Steroid biosynthesis	XP_710679.2|8.0e-265|delta(14)-sterol reductase [Candida albicans SC5314]	GO:0008152//metabolic process;GO:1901362//organic cyclic compound biosynthetic process;GO:0044283//small molecule biosynthetic process;GO:0044107//cellular alcohol metabolic process;GO:0009405//pathogenesis;GO:0009058//biosynthetic process;GO:0070887//cellular response to chemical stimulus;GO:1901360//organic cyclic compound metabolic process;GO:0044255//cellular lipid metabolic process;GO:004441…
3635806	3635806	XM_717496.1	Known_gene	1	457206	458084	NC_032090.1	+	879	879	109.58	89.96	364.03	68.6	166.63	236.54	187.856	157.256	0.171686	0.873717	0.734958	0.675704	6.05233e-22	2.63396e-22	1.12741	1.90995e-161	2.0924e-162	-1.39473	7.43229e-141	8.25532e-142	NA	XP_722589.1|1.6e-165|hypothetical protein CAALFM_C202280WA [Candida albicans SC5314]	GO:0110165//cellular anatomical entity;GO:0031966//mitochondrial membrane;GO:0031224//intrinsic component of membrane;GO:0043229//intracellular organelle;GO:0005737//cytoplasm;GO:0005622//intracellular;GO:0031090//organelle membrane;GO:0016021//integral component of membrane;GO:0005739//mitochondrion;GO:0071944//cell periphery;GO:0005886//plasma membrane;GO:0043231//intracellular membrane-bounded…
3636935	SEC1	XM_716227.1	Known_gene	1	502656	504995	NC_032095.1	+	2340	2340	31.22	37.39	29.52	22.84	22.18	30.73	32.71	25.25	0.376987	0.477871	0.241116	0.450908	8.33705e-10	4.76044e-10	0.412433	5.31988e-08	3.27384e-08	0.283005	8.94903e-06	5.21964e-06	K15292//syntaxin-binding protein 1	XP_721320.1|0.0e+00|Sec1p [Candida albicans SC5314]	GO:0140029//exocytic process;GO:0051640//organelle localization;GO:0140352//export from cell;GO:0046903//secretion;GO:0051179//localization;GO:0051234//establishment of localization;GO:0006904//vesicle docking involved in exocytosis;GO:0022406//membrane docking;GO:0140056//organelle localization by membrane tethering;GO:0006810//transport;GO:0006887//exocytosis;GO:0048278//vesicle docking;GO:0051…
3645961	NAG6	XM_707333.2	Known_gene	1	1016757	1019129	NC_032094.1	+	2373	2373	351.09	217.58	171.68	492.53	270.59	260.41	246.783	341.176	-0.396084	0.579782	0.339671	-0.488371	1.28079e-157	1.9302e-158	-0.656387	2.93965e-140	3.60338e-141	-0.259239	2.96711e-24	9.62778e-25	K22698//protein SEY1 [EC:3.6.5.-]	XP_712426.1|0.0e+00|dynamin-like GTPase [Candida albicans SC5314]	GO:0071840//cellular component organization or biogenesis;GO:0010256//endomembrane system organization;GO:0035690//cellular response to drug;GO:0006996//organelle organization;GO:0090174//organelle membrane fusion;GO:0061025//membrane fusion;GO:0051716//cellular response to stimulus;GO:0050896//response to stimulus;GO:0006810//transport;GO:0051179//localization;GO:0008645//hexose transmembrane tr…
3634923	HEM14	XM_718340.2	Known_gene	1	1931304	1932899	NC_032089.1	+	1596	1596	1.4	2.25	16.86	8.3	5.16	3.3	6.836	5.586	0.136262	0.921841	0.826849	-2.56768	1.92895e-24	8.04268e-25	1.70816	1.01223e-28	3.76458e-29	-0.552541	0.0721418	0.0579098	K00231//protoporphyrinogen/coproporphyrinogen III oxidase [EC:1.3.3.4 1.3.3.15]+ko00860//Porphyrin and chlorophyll metabolism+ko01100//Metabolic pathways+ko01110//Biosynthesis of secondary metabolites	XP_723433.2|2.9e-306|oxygen-dependent protoporphyrinogen oxidase [Candida albicans SC5314]	GO:0033013//tetrapyrrole metabolic process;GO:0042168//heme metabolic process;GO:0071704//organic substance metabolic process;GO:0006807//nitrogen compound metabolic process;GO:0033014//tetrapyrrole biosynthetic process;GO:0008152//metabolic process;GO:1901360//organic cyclic compound metabolic process;GO:0019438//aromatic compound biosynthetic process;GO:0046501//protoporphyrinogen IX metabolic …
3641876	PDK2	XM_711323.1	Known_gene	1	1902380	1903915	NC_032096.1	+	1536	1536	262.41	240.04	56.41	64.16	164.44	104.98	186.286	111.193	0.691861	0.410298	0.188293	2.03208	0	0	-1.54354	2.67491e-215	2.2827e-216	1.19316	1.85645e-230	1.4662e-231	K00898//pyruvate dehydrogenase kinase 2/3/4 [EC:2.7.11.2]	XP_716416.1|3.3e-299|protein kinase [Candida albicans SC5314]	GO:0042493//response to drug;GO:0065008//regulation of biological quality;GO:0065009//regulation of molecular function;GO:0050896//response to stimulus;GO:0051341//regulation of oxidoreductase activity;GO:0009892//negative regulation of metabolic process;GO:0044092//negative regulation of molecular function;GO:0070887//cellular response to chemical stimulus;GO:0048878//chemical homeostasis;GO:190…
3643535	3643535	XM_019475251.1	Known_gene	1	1437380	1438551	NC_032090.1	+	1172	1104	24.11	41.45	126.12	30.41	32.22	22.18	63.893	28.27	0.976304	0.165636	0.043291	-0.334914	0.00278593	0.00207312	1.96877	5.75995e-166	6.19474e-167	0.902113	4.50512e-19	1.65488e-19	NA	XP_019330796.1|3.9e-201|hypothetical protein CAALFM_C207010WA [Candida albicans SC5314]	GO:0005783//endoplasmic reticulum;GO:0043226//organelle;GO:0110165//cellular anatomical entity;GO:0043229//intracellular organelle;GO:0043227//membrane-bounded organelle;GO:0005622//intracellular;GO:0012505//endomembrane system;GO:0043231//intracellular membrane-bounded organelle;GO:0005737//cytoplasm;GO:0043169//cation binding;GO:0046872//metal ion binding;GO:0005488//binding;GO:0005509//calcium…
3645359	3645359	XM_704855.2	Known_gene	1	792424	793434	NC_032092.1	-	1011	1011	42.14	47.95	182.3	133.72	69.96	134.58	90.796	112.753	-0.331058	0.707194	0.494812	-1.66595	9.56253e-129	1.63645e-129	1.38171	5.16711e-131	6.6703e-132	-1.48886	2.38333e-105	3.15988e-106	K04125//gibberellin 2beta-dioxygenase [EC:1.14.11.13]+ko00904//Diterpenoid biosynthesis+ko01110//Biosynthesis of secondary metabolites;K18696//glycerophosphodiester phosphodiesterase [EC:3.1.4.46]+ko00564//Glycerophospholipid metabolism	XP_709947.2|1.2e-191|hypothetical protein CAALFM_C403720CA [Candida albicans SC5314]	GO:0046872//metal ion binding;GO:0043169//cation binding;GO:0043167//ion binding;GO:0051213//dioxygenase activity;GO:0003824//catalytic activity;GO:0016491//oxidoreductase activity;GO:0005488//binding;
3641260	UBC15	XM_712047.1	Known_gene	1	2184896	2185423	NC_032090.1	+	528	528	92.6	104.28	106.86	14.4	43.51	34.24	101.246	30.716	1.59459	0.00297598	0.000175417	2.68494	2.21747e-73	5.29862e-74	1.2963	2.48398e-32	8.70306e-33	1.60671	1.60029e-47	3.58728e-48	K10688//ubiquitin-conjugating enzyme E2 W [EC:2.3.2.25]+ko04120//Ubiquitin mediated proteolysis	XP_717140.1|1.7e-98|Ubc15p [Candida albicans SC5314]	GO:0006807//nitrogen compound metabolic process;GO:0036211//protein modification process;GO:0010498//proteasomal protein catabolic process;GO:0044237//cellular metabolic process;GO:0019538//protein metabolic process;GO:0071704//organic substance metabolic process;GO:0030163//protein catabolic process;GO:0043412//macromolecule modification;GO:0044257//cellular protein catabolic process;GO:0043161/…
3645467	3645467	XM_707840.2	Known_gene	1	929893	930708	NC_032090.1	+	816	816	0.78	0.69	8.39	4.22	2.18	1.89	3.286	2.763	0.0972993	0.947937	0.88697	-2.4357	2.88394e-06	1.87128e-06	1.94434	7.16781e-09	4.27938e-09	-1.45372	0.0387153	0.0301538	NA	XP_712933.2|4.1e-147|hypothetical protein CAALFM_C204450WA [Candida albicans SC5314]	NA
3639282	SIN3	XM_019475060.1	Known_gene	1	185507	190145	NC_032089.1	-	4639	4236	54.54	63.79	28.83	72.04	89.57	71.87	49.053	77.826	-0.580914	0.351957	0.143228	-0.401483	1.19304e-30	4.4789e-31	-1.63544	0	0	-0.172059	1.26165e-06	7.0471e-07	K11644//paired amphipathic helix protein Sin3a+ko04139//Mitophagy - yeast	XP_019330605.1|0.0e+00|transcriptional regulator [Candida albicans SC5314]	GO:0006325//chromatin organization;GO:0006355//regulation of transcription, DNA-templated;GO:0000122//negative regulation of transcription by RNA polymerase II;GO:0051253//negative regulation of RNA metabolic process;GO:1903506//regulation of nucleic acid-templated transcription;GO:0060255//regulation of macromolecule metabolic process;GO:0051171//regulation of nitrogen compound metabolic process…
3642573	3642573	XM_710665.2	Known_gene	1	615879	618245	NC_032096.1	+	2367	2367	4.49	5.6	3.04	2.35	4.22	4.32	4.376	3.63	0.275393	0.73491	0.532434	0.934055	9.26772e-06	6.13296e-06	-0.473172	0.024591	0.0201434	0.374396	0.0287058	0.022025	K11547//kinetochore protein NDC80	XP_715758.2|0.0e+00|kinetochore-associated Ndc80 complex subunit [Candida albicans SC5314]	GO:0051315//attachment of mitotic spindle microtubules to kinetochore;GO:0000280//nuclear division;GO:0008608//attachment of spindle microtubules to kinetochore;GO:0140014//mitotic nuclear division;GO:0051656//establishment of organelle localization;GO:0007049//cell cycle;GO:0006996//organelle organization;GO:0022402//cell cycle process;GO:0051303//establishment of chromosome localization;GO:0007…
3645429	CYS4	XM_707868.2	Known_gene	1	384790	386280	NC_032089.1	-	1491	1491	53.77	67.68	153.19	190.39	136.6	200.67	91.546	175.886	-0.909422	0.101661	0.0199102	-1.82408	0	0	0.165365	3.45933e-05	2.40154e-05	-1.56802	4.1977e-264	3.03312e-265	K01697//cystathionine beta-synthase [EC:4.2.1.22]+ko01100//Metabolic pathways+ko01230//Biosynthesis of amino acids+ko01130//Biosynthesis of antibiotics+ko00260//Glycine, serine and threonine metabolism+ko00270//Cysteine and methionine metabolism	XP_712961.1|1.7e-279|cystathionine beta-synthase [Candida albicans SC5314]	GO:0000097//sulfur amino acid biosynthetic process;GO:0044249//cellular biosynthetic process;GO:0009069//serine family amino acid metabolic process;GO:0006790//sulfur compound metabolic process;GO:0019752//carboxylic acid metabolic process;GO:1901576//organic substance biosynthetic process;GO:0009070//serine family amino acid biosynthetic process;GO:0019344//cysteine biosynthetic process;GO:00442…
3638515	3638515	XM_714798.1	Known_gene	1	1615420	1615779	NC_032091.1	+	360	360	5.57	6.03	17.88	6.05	7.21	5.82	9.826	6.36	0.49576	0.623216	0.390553	-0.119258	0.832088	0.813	1.31028	0.000296049	0.000215758	0.0511388	0.760624	0.734678	K11368//enhancer of yellow 2 transcription factor	XP_719891.1|6.4e-60|hypothetical protein CAALFM_C307050WA [Candida albicans SC5314]	GO:0006139//nucleobase-containing compound metabolic process;GO:0080090//regulation of primary metabolic process;GO:0051179//localization;GO:0051173//positive regulation of nitrogen compound metabolic process;GO:0097659//nucleic acid-templated transcription;GO:0031326//regulation of cellular biosynthetic process;GO:0046907//intracellular transport;GO:0044267//cellular protein metabolic process;GO…
3639345	3639345	XM_713893.1	Known_gene	1	156643	157689	NC_032089.1	+	1047	1047	17.48	23.04	19.89	16.97	18.67	30.37	20.136	22.003	-0.0963164	0.905513	0.794526	0.0427186	0.786648	0.764914	0.0913213	0.485994	0.458318	-0.398506	0.00158626	0.00107181	NA	XP_718986.1|3.4e-194|hypothetical protein CAALFM_C100820WA [Candida albicans SC5314]	NA
3642134	3642134	XM_711161.1	Known_gene	1	1828604	1830001	NC_032096.1	+	1398	1398	188.8	166.15	137.83	187.49	215.79	192.52	164.26	198.6	-0.236792	0.677899	0.455356	0.0100451	0.812137	0.791874	-0.646738	1.52742e-61	3.52266e-62	-0.212522	3.51156e-07	1.91009e-07	K03114//mitosis inhibitor protein kinase SWE1 [EC:2.7.11.1]+ko04011//MAPK signaling pathway - yeast+ko04113//Meiosis - yeast+ko04111//Cell cycle - yeast;K06649//regulatory protein SWI4+ko04011//MAPK signaling pathway - yeast+ko04113//Meiosis - yeast+ko04111//Cell cycle - yeast;K09184//GATA-binding protein, other eukaryote	XP_716254.1|7.8e-263|hypothetical protein CAALFM_CR08470WA [Candida albicans SC5314]	GO:0009987//cellular process;GO:0043170//macromolecule metabolic process;GO:0042221//response to chemical;GO:1901566//organonitrogen compound biosynthetic process;GO:0006950//response to stress;GO:0070085//glycosylation;GO:0050896//response to stimulus;GO:0062197//cellular response to chemical stress;GO:0006979//response to oxidative stress;GO:0051716//cellular response to stimulus;GO:0033554//ce…
3646525	PGA49	XM_706759.2	Known_gene	1	1312804	1315008	NC_032092.1	-	2205	2205	2.55	2.32	1.8	15.04	16.58	2.47	2.223	11.363	-1.9685	0.00534791	0.000355222	-2.56024	1.43562e-60	3.83184e-61	-3.20338	9.33183e-80	1.79686e-80	-0.0903862	0.782182	0.75734	K14644//subtilase-type proteinase RRT12 [EC:3.4.21.-];K11294//nucleolin;K01183//chitinase [EC:3.2.1.14]+ko00520//Amino sugar and nucleotide sugar metabolism+ko01100//Metabolic pathways	XP_711852.2|0.0e+00|Pga49p [Candida albicans SC5314]	GO:0005886//plasma membrane;GO:0071944//cell periphery;GO:0031225//anchored component of membrane;GO:0110165//cellular anatomical entity;GO:0016020//membrane;GO:0031224//intrinsic component of membrane;
3643755	TAC1	XM_709512.2	Known_gene	1	416400	419345	NC_032093.1	-	2946	2946	68.82	61.53	44.14	28.49	50.93	52.62	58.163	44.013	0.401129	0.532609	0.293037	1.27237	1.25312e-143	1.99761e-144	-0.206429	4.71828e-05	3.29996e-05	0.225679	1.93616e-07	1.04047e-07	K21641//glucose transport transcription regulator RGT1	XP_714605.2|0.0e+00|Tac1p [Candida albicans SC5314]	GO:0051716//cellular response to stimulus;GO:0042221//response to chemical;GO:0062197//cellular response to chemical stress;GO:0036180//filamentous growth of a population of unicellular organisms in response to biotic stimulus;GO:0016070//RNA metabolic process;GO:0006357//regulation of transcription by RNA polymerase II;GO:0046483//heterocycle metabolic process;GO:0097659//nucleic acid-templated …
3644922	3644922	XM_708316.1	Known_gene	1	544683	546848	NC_032096.1	+	2166	2166	NA	NA	NA	NA	NA	NA	NA	NA	NA	NA	NA	NA	NA	NA	NA	NA	NA	NA	NA	NA	K10273//F-box and leucine-rich repeat protein 7	XP_713409.1|0.0e+00|hypothetical protein CAALFM_CR02460WA [Candida albicans SC5314]	NA
30514987	30514987	XM_019475099.1	Known_gene	1	946251	946439	NC_032089.1	+	189	189	32.25	36.46	75.81	46.76	89.38	56.7	48.173	64.28	-0.29222	0.748505	0.551006	-0.535976	0.163609	0.142679	-0.237564	0.550376	0.52317	-0.637034	0.362737	0.323848	NA	XP_019330644.1|1.2e-25|hypothetical protein CAALFM_C104590WA [Candida albicans SC5314]	GO:0031224//intrinsic component of membrane;GO:0110165//cellular anatomical entity;GO:0016021//integral component of membrane;GO:0016020//membrane;
3646834	3646834	XM_706482.2	Known_gene	1	2761699	2764434	NC_032089.1	-	2736	2736	2	4.14	7.11	8.93	5.89	7.87	4.416	7.563	-0.736581	0.269048	0.0919519	-2.15866	1.92067e-37	6.51588e-38	0.271582	0.0535616	0.045073	-0.926733	5.92898e-10	2.86436e-10	K12855//pre-mRNA-processing factor 6+ko03040//Spliceosome	XP_711574.2|0.0e+00|U4/U6-U5 snRNP complex subunit [Candida albicans SC5314]	GO:0022613//ribonucleoprotein complex biogenesis;GO:0006725//cellular aromatic compound metabolic process;GO:0016043//cellular component organization;GO:0016070//RNA metabolic process;GO:0046483//heterocycle metabolic process;GO:0071826//ribonucleoprotein complex subunit organization;GO:0071840//cellular component organization or biogenesis;GO:0043170//macromolecule metabolic process;GO:0022618//…
30515386	RPL28	XM_019475522.1	Known_gene	1	692731	693531	NC_032096.1	-	801	450	149.29	327.78	958.28	861.75	871.59	422.34	478.45	718.56	-0.55689	0.514958	0.275524	-2.52915	0	0	0.136798	2.94617e-06	1.93115e-06	-0.365677	3.92288e-08	2.03626e-08	K02900//large subunit ribosomal protein L27Ae+ko03010//Ribosome	XP_002421866.1|1.9e-82|60S ribosomal protein L28 [Candida dubliniensis CD36]	GO:0009058//biosynthetic process;GO:0009987//cellular process;GO:0010467//gene expression;GO:1901576//organic substance biosynthetic process;GO:0044271//cellular nitrogen compound biosynthetic process;GO:0006807//nitrogen compound metabolic process;GO:0008152//metabolic process;GO:0006518//peptide metabolic process;GO:0044267//cellular protein metabolic process;GO:0044237//cellular metabolic proc…
3637379	3637379	XM_715842.2	Known_gene	1	862515	863651	NC_032090.1	+	1137	1137	42.08	47.44	41.21	30.94	44.43	120.16	43.576	65.176	-0.4881	0.532179	0.292535	0.443662	2.65565e-06	1.72092e-06	-0.10854	0.270114	0.244898	-1.34078	3.59314e-92	5.28314e-93	NA	XP_720935.2|2.7e-213|hypothetical protein CAALFM_C204100WA, partial [Candida albicans SC5314]	GO:0031224//intrinsic component of membrane;GO:0005622//intracellular;GO:0005737//cytoplasm;GO:0005739//mitochondrion;GO:0110165//cellular anatomical entity;GO:0043227//membrane-bounded organelle;GO:0043226//organelle;GO:0016020//membrane;GO:0016021//integral component of membrane;GO:0043231//intracellular membrane-bounded organelle;GO:0043229//intracellular organelle;
3648086	GDH3	XM_705219.2	Known_gene	1	1362406	1363776	NC_032092.1	+	1371	1371	10019.9	9113.35	2185.49	11592.7	9100.08	7333.59	7106.24	9342.13	-0.284661	0.762966	0.568751	-0.210354	0	0	-2.05792	0	0	0.313462	0	0	K00262//glutamate dehydrogenase (NADP+) [EC:1.4.1.4]+ko00250//Alanine, aspartate and glutamate metabolism+ko00910//Nitrogen metabolism+ko00220//Arginine biosynthesis+ko01100//Metabolic pathways	XP_710311.1|1.2e-263|glutamate dehydrogenase (NADP(+)) [Candida albicans SC5314]	GO:0044281//small molecule metabolic process;GO:1901564//organonitrogen compound metabolic process;GO:0006082//organic acid metabolic process;GO:0008152//metabolic process;GO:0009058//biosynthetic process;GO:0044249//cellular biosynthetic process;GO:0071704//organic substance metabolic process;GO:0044238//primary metabolic process;GO:0016053//organic acid biosynthetic process;GO:1901607//alpha-am…
3646972	RPS25B	XM_706324.1	Known_gene	1	793426	793743	NC_032093.1	-	318	318	576.69	775.4	2282.6	2344.42	2155.02	1063.34	1211.56	1854.26	-0.570122	0.452746	0.221813	-2.02336	0	0	0.0829768	2.6935e-05	1.85864e-05	-0.45559	1.90169e-13	8.18388e-14	K02975//small subunit ribosomal protein S25e+ko03010//Ribosome	XP_711416.1|8.2e-51|ribosomal 40S subunit protein S25B [Candida albicans SC5314]	GO:0043229//intracellular organelle;GO:0032991//protein-containing complex;GO:0043232//intracellular non-membrane-bounded organelle;GO:0044391//ribosomal subunit;GO:0005840//ribosome;GO:0022626//cytosolic ribosome;GO:0022627//cytosolic small ribosomal subunit;GO:0005622//intracellular;GO:0005737//cytoplasm;GO:1990904//ribonucleoprotein complex;GO:0043228//non-membrane-bounded organelle;GO:0043226…
3647229	3647229	XM_706073.2	Known_gene	1	839331	840098	NC_032093.1	-	768	768	1.09	0.98	4.39	3.26	5.51	2.48	2.153	3.75	-0.685488	0.50766	0.26768	-1.58054	0.00313861	0.00234292	-0.327831	0.362697	0.33544	-1.33949	0.0318038	0.0245302	NA	XP_711165.2|1.7e-139|hypothetical protein CAALFM_C503810CA [Candida albicans SC5314]	NA
3635723	3635723	XM_717398.1	Known_gene	1	237215	239071	NC_032090.1	-	1857	1857	28.02	91.39	38.46	68.7	94.96	150.1	52.623	104.586	-0.843666	0.23577	0.07485	-1.29385	3.82772e-90	8.06308e-91	-1.30396	1.81824e-119	2.52938e-120	-0.715816	2.48557e-70	4.39392e-71	K01183//chitinase [EC:3.2.1.14]+ko00520//Amino sugar and nucleotide sugar metabolism+ko01100//Metabolic pathways	XP_722491.1|0.0e+00|hypothetical protein CAALFM_C201370CA [Candida albicans SC5314]	NA
3635692	3635692	XM_717545.1	Known_gene	1	443684	444265	NC_032092.1	-	582	582	0.34	0.52	0.37	2.16	6.21	0.8	0.41	3.056	-1.79276	0.0766335	0.012936	-2.66742	0.00672435	0.00513334	-4.069	1.54763e-08	9.35608e-09	-0.621488	0.654804	0.622454	NA	XP_722638.1|3.5e-108|hypothetical protein CAALFM_C402240CA [Candida albicans SC5314]	GO:1901135//carbohydrate derivative metabolic process;GO:0044237//cellular metabolic process;GO:0019538//protein metabolic process;GO:0006458//'de novo' protein folding;GO:0044260//cellular macromolecule metabolic process;GO:0043170//macromolecule metabolic process;GO:0071704//organic substance metabolic process;GO:0097502//mannosylation;GO:0006457//protein folding;GO:0036211//protein modificatio…
3636971	3636971	XM_716272.2	Known_gene	1	413292	416609	NC_032095.1	-	3318	3318	226.59	251.08	115.99	187.86	238.79	205.17	197.886	210.606	-0.0463198	0.959374	0.906503	0.270426	2.8091e-35	9.84032e-36	-1.04174	0	0	0.291327	1.82804e-46	4.16846e-47	NA	XP_721365.1|0.0e+00|pheromone-regulated protein [Candida albicans SC5314]	GO:0016020//membrane;GO:0031224//intrinsic component of membrane;GO:0110165//cellular anatomical entity;GO:0016021//integral component of membrane;
30515082	RPL38	XM_019475189.1	Known_gene	1	28553	28789	NC_032090.1	+	237	237	360.12	346.03	1225	1340.47	1296	694.34	643.716	1110.27	-0.711784	0.308046	0.116019	-1.89619	2.52322e-177	3.49414e-178	-0.081284	0.67392	0.649948	-1.00475	3.40945e-24	1.11032e-24	K02923//large subunit ribosomal protein L38e+ko03010//Ribosome	XP_002417998.1|1.4e-34|60S ribosomal protein L38 [Candida dubliniensis CD36]	GO:0044271//cellular nitrogen compound biosynthetic process;GO:0006807//nitrogen compound metabolic process;GO:0044249//cellular biosynthetic process;GO:0006412//translation;GO:0016070//RNA metabolic process;GO:0043043//peptide biosynthetic process;GO:0006518//peptide metabolic process;GO:0009987//cellular process;GO:0043170//macromolecule metabolic process;GO:0010467//gene expression;GO:0044085/…
3645628	3645628	XM_707639.1	Known_gene	1	804528	805997	NC_032091.1	-	1470	1470	46.35	50.54	59.46	60.07	54.81	69.33	52.116	61.403	-0.223343	0.653505	0.423957	-0.374075	2.73333e-08	1.64311e-08	0.11748	0.0675147	0.0574236	-0.456054	7.09499e-12	3.19996e-12	K14399//polyribonucleotide 5'-hydroxyl-kinase [EC:2.7.1.78]+ko03015//mRNA surveillance pathway	XP_712732.1|1.4e-275|cleavage polyadenylation factor subunit [Candida albicans SC5314]	GO:0000394//RNA splicing, via endonucleolytic cleavage and ligation;GO:0006397//mRNA processing;GO:0006399//tRNA metabolic process;GO:0031123//RNA 3'-end processing;GO:0006396//RNA processing;GO:0043170//macromolecule metabolic process;GO:0009987//cellular process;GO:0044237//cellular metabolic process;GO:1901360//organic cyclic compound metabolic process;GO:0008152//metabolic process;GO:0042493/…
3640271	3640271	XM_704922.2	Known_gene	1	863059	864597	NC_032094.1	-	1539	1539	16.69	12.26	20.13	10.36	12.4	19.47	16.36	14.076	0.201606	0.774512	0.584136	0.68796	2.14338e-07	1.33046e-07	0.699007	7.6016e-09	4.54598e-09	-0.667294	1.21522e-07	6.4651e-08	K01183//chitinase [EC:3.2.1.14]+ko00520//Amino sugar and nucleotide sugar metabolism+ko01100//Metabolic pathways;K19898//alpha-agglutinin	XP_710014.2|6.5e-287|hypothetical protein CAALFM_C603990CA [Candida albicans SC5314]	GO:0007154//cell communication;GO:0040007//growth;GO:0031667//response to nutrient levels;GO:0009987//cellular process;GO:0044182//filamentous growth of a population of unicellular organisms;GO:0009267//cellular response to starvation;GO:0051716//cellular response to stimulus;GO:0050896//response to stimulus;GO:0031668//cellular response to extracellular stimulus;GO:0006950//response to stress;GO…
3638353	3638353	XM_714940.1	Known_gene	1	718781	721924	NC_032091.1	-	3144	3144	7.78	6.04	32.5	33.89	20.07	9.2	15.44	21.053	-0.453068	0.637815	0.40747	-2.12302	2.06039e-156	3.11542e-157	0.695399	5.81007e-27	2.24136e-27	-0.607085	7.11352e-07	3.91596e-07	K01228//mannosyl-oligosaccharide glucosidase [EC:3.2.1.106]+ko04141//Protein processing in endoplasmic reticulum+ko01100//Metabolic pathways+ko00510//N-Glycan biosynthesis	XP_720033.1|0.0e+00|hypothetical protein CAALFM_C303410CA [Candida albicans SC5314]	GO:0071704//organic substance metabolic process;GO:0008152//metabolic process;GO:0044238//primary metabolic process;GO:0009311//oligosaccharide metabolic process;GO:0005975//carbohydrate metabolic process;GO:0015926//glucosidase activity;GO:0004553//hydrolase activity, hydrolyzing O-glycosyl compounds;GO:0016787//hydrolase activity;GO:0004573//mannosyl-oligosaccharide glucosidase activity;GO:0016…
3643919	MSU1	XM_709373.2	Known_gene	1	1728216	1731656	NC_032090.1	-	3441	3441	21.86	53.66	44.91	48.65	47.85	63.93	40.143	53.476	-0.382705	0.555522	0.315631	-1.15415	2.03027e-102	4.00138e-103	-0.0914822	0.0606307	0.0513052	-0.252646	1.93668e-09	9.49952e-10	K19782//exoribonuclease II, mitochondrial [EC:3.1.13.1]	XP_714466.2|0.0e+00|Msu1p [Candida albicans SC5314]	GO:0006401//RNA catabolic process;GO:0090304//nucleic acid metabolic process;GO:0034655//nucleobase-containing compound catabolic process;GO:0044265//cellular macromolecule catabolic process;GO:0065007//biological regulation;GO:0044238//primary metabolic process;GO:0044237//cellular metabolic process;GO:0006402//mRNA catabolic process;GO:0071704//organic substance metabolic process;GO:0050789//re…
3639222	3639222	XM_714005.2	Known_gene	1	537774	538826	NC_032094.1	-	1053	1053	36.22	30.21	42.54	47.47	32.19	48.4	36.323	42.686	-0.215327	0.70973	0.498426	-0.39023	2.32065e-05	1.56057e-05	0.402207	3.58581e-05	2.49174e-05	-0.679981	9.42941e-12	4.26708e-12	K13333//lysophospholipase [EC:3.1.1.5]+ko00564//Glycerophospholipid metabolism	XP_719098.2|6.2e-196|hypothetical protein CAALFM_C602640CA [Candida albicans SC5314]	GO:0007017//microtubule-based process;GO:0007010//cytoskeleton organization;GO:0051179//localization;GO:0007059//chromosome segregation;GO:0051276//chromosome organization;GO:0016192//vesicle-mediated transport;GO:0000022//mitotic spindle elongation;GO:0000278//mitotic cell cycle;GO:0009987//cellular process;GO:0016043//cellular component organization;GO:1903047//mitotic cell cycle process;GO:005…
3639550	3639550	XM_713758.2	Known_gene	1	1380391	1381107	NC_032089.1	+	717	717	5.25	4.67	26.16	11.8	15.72	12.29	12.026	13.27	-0.189785	0.869174	0.728821	-1.1684	1.3175e-05	8.77158e-06	0.734761	9.65466e-06	6.50416e-06	-1.39599	7.84133e-07	4.32584e-07	NA	XP_718851.1|1.5e-132|hypothetical protein CAALFM_C106500WA [Candida albicans SC5314]	NA
BGI_novel_G000017	BGI_novel_G000017	BGI_novel_T000253	Novel_gene	1	943970	946451	NC_032095.1	-	2482	2482	5.07	9.74	30.29	2.76	0.37	0.57	15.033	1.233	2.78005	0.000208242	6.51733e-06	0.877317	5.91286e-06	3.87722e-06	6.35517	6.11927e-263	4.24098e-264	4.09489	1.22089e-70	2.15004e-71	NA	NA	GO:0009267//cellular response to starvation;GO:0006950//response to stress;GO:0031669//cellular response to nutrient levels;GO:0050896//response to stimulus;GO:0031667//response to nutrient levels;GO:0071496//cellular response to external stimulus;GO:0009605//response to external stimulus;GO:0040007//growth;GO:0033554//cellular response to stress;GO:0031668//cellular response to extracellular sti…
3642125	PRP8	XM_711186.1	Known_gene	1	1864316	1871566	NC_032096.1	+	7251	7251	20.04	35.99	27.54	30.43	27.81	30.03	27.856	29.423	-0.0670204	0.927746	0.839404	-0.602612	1.83002e-46	5.59242e-47	-0.0140752	0.764881	0.744316	0.261192	8.69522e-13	3.8048e-13	K12856//pre-mRNA-processing factor 8+ko03040//Spliceosome	KHC28864.1|0.0e+00|pre-mRNA-processing factor 8 [Candida albicans Ca6]	GO:0006807//nitrogen compound metabolic process;GO:0016070//RNA metabolic process;GO:0000375//RNA splicing, via transesterification reactions;GO:0006139//nucleobase-containing compound metabolic process;GO:0016071//mRNA metabolic process;GO:0071704//organic substance metabolic process;GO:0000398//mRNA splicing, via spliceosome;GO:0044238//primary metabolic process;GO:0090304//nucleic acid metabol…
3643818	PHO13	XM_709483.2	Known_gene	1	1940851	1941816	NC_032090.1	+	966	966	43.17	27.23	18.13	16.97	7.37	9.78	29.51	11.373	1.27602	0.044974	0.0059091	1.34704	5.64905e-30	2.14346e-30	1.29864	1.68202e-12	8.97192e-13	1.47729	5.06788e-23	1.68958e-23	K01101//4-nitrophenyl phosphatase [EC:3.1.3.41]	XP_714576.2|1.5e-180|Pho13p [Candida albicans SC5314]	GO:0016311//dephosphorylation;GO:0071704//organic substance metabolic process;GO:0009987//cellular process;GO:0044260//cellular macromolecule metabolic process;GO:0006793//phosphorus metabolic process;GO:0044237//cellular metabolic process;GO:0036211//protein modification process;GO:0006796//phosphate-containing compound metabolic process;GO:0006464//cellular protein modification process;GO:00081…
3645647	3645647	XM_707658.2	Known_gene	1	779861	780721	NC_032091.1	+	861	861	246.06	125.1	106.64	146.53	226.2	135.73	159.266	169.486	-0.0469395	0.961681	0.912199	0.747814	3.92274e-55	1.0976e-55	-1.08485	4.489e-88	8.00644e-89	-0.117658	0.167567	0.14138	K12386//cystinosin	XP_712751.2|3.6e-162|hypothetical protein CAALFM_C303690WA [Candida albicans SC5314]	GO:0071702//organic substance transport;GO:0009987//cellular process;GO:0003333//amino acid transmembrane transport;GO:0006865//amino acid transport;GO:0015711//organic anion transport;GO:0071705//nitrogen compound transport;GO:0051234//establishment of localization;GO:0006820//anion transport;GO:0034220//ion transmembrane transport;GO:0006811//ion transport;GO:1905039//carboxylic acid transmembr…
3645351	NUP84	XM_704847.1	Known_gene	1	803672	806206	NC_032092.1	-	2535	2535	11.15	37.6	18.42	58.98	59.64	48.93	22.39	55.85	-1.17234	0.0557594	0.00810354	-2.40318	6.25818e-252	6.89532e-253	-1.69501	1.96257e-154	2.25492e-155	-0.379987	4.08671e-11	1.89262e-11	K14301//nuclear pore complex protein Nup107+ko03013//RNA transport	XP_709939.1|0.0e+00|Nup84p [Candida albicans SC5314]	GO:0050789//regulation of biological process;GO:0033365//protein localization to organelle;GO:0000973//posttranscriptional tethering of RNA polymerase II gene DNA at nuclear periphery;GO:0065007//biological regulation;GO:0000972//transcription-dependent tethering of RNA polymerase II gene DNA at nuclear periphery;GO:0009889//regulation of biosynthetic process;GO:0071704//organic substance metabol…
3639193	3639193	XM_714047.2	Known_gene	1	617910	619601	NC_032094.1	+	1692	1692	34.31	28.62	21.12	21.06	26.8	52.75	28.016	33.536	-0.199012	0.813486	0.63742	0.704124	5.36374e-16	2.619e-16	-0.343623	0.000389438	0.00028564	-0.882147	7.26421e-33	1.99702e-33	NA	XP_719140.2|0.0e+00|hypothetical protein CAALFM_C602990WA [Candida albicans SC5314]	NA
3646843	3646843	XM_706453.1	Known_gene	1	918145	918480	NC_032092.1	-	336	336	111.83	55.4	198.93	42.28	107.39	141.68	122.053	97.116	0.279179	0.76203	0.567304	1.40326	8.65497e-20	3.92314e-20	0.889401	8.68758e-18	3.99414e-18	-1.35468	3.02012e-20	1.08097e-20	NA	XP_711545.1|8.0e-57|hypothetical protein CAALFM_C404300CA [Candida albicans SC5314]	GO:0031224//intrinsic component of membrane;GO:0110165//cellular anatomical entity;GO:0016021//integral component of membrane;GO:0016020//membrane;
3637896	3637896	XM_019475369.1	Known_gene	1	586325	588797	NC_032092.1	+	2473	2409	0.07	0	0.11	0.16	0.26	0.25	0.06	0.223	-1.00669	0.399778	0.180737	-1.19265	0.343206	0.311828	-1.24101	0.226799	0.203468	-4.64386	0.00872053	0.00634074	K08741//DNA mismatch repair protein MSH5	XP_019330914.1|0.0e+00|MutS family protein [Candida albicans SC5314]	GO:0007049//cell cycle;GO:1903046//meiotic cell cycle process;GO:0006996//organelle organization;GO:0046483//heterocycle metabolic process;GO:0006281//DNA repair;GO:0007127//meiosis I;GO:0050896//response to stimulus;GO:0034641//cellular nitrogen compound metabolic process;GO:0000280//nuclear division;GO:0009987//cellular process;GO:0048285//organelle fission;GO:0016043//cellular component organi…
3647257	GLC7	XM_706050.2	Known_gene	1	1660822	1661814	NC_032096.1	+	993	993	150.18	123.63	186.36	179.77	185.03	186.58	153.39	183.793	-0.252547	0.600128	0.36196	-0.25946	5.09683e-08	3.0878e-08	0.010333	0.693892	0.670252	-0.593765	2.31789e-30	6.67986e-31	K06269//serine/threonine-protein phosphatase PP1 catalytic subunit [EC:3.1.3.16]+ko04113//Meiosis - yeast+ko03015//mRNA surveillance pathway	XP_711142.1|2.4e-194|type 1 serine/threonine-protein phosphatase catalytic subunit [Candida albicans SC5314]	GO:0016570//histone modification;GO:0051276//chromosome organization;GO:0032956//regulation of actin cytoskeleton organization;GO:0031326//regulation of cellular biosynthetic process;GO:1905819//negative regulation of chromosome separation;GO:0050794//regulation of cellular process;GO:0006470//protein dephosphorylation;GO:0045814//negative regulation of gene expression, epigenetic;GO:0051246//reg…
3643501	3643501	XM_709759.2	Known_gene	1	1443720	1444874	NC_032090.1	+	1155	1155	57.24	42.62	68.6	73.49	33.11	44.3	56.153	50.3	0.148444	0.848146	0.693734	-0.360524	2.22346e-07	1.38166e-07	1.05094	2.37445e-38	7.46674e-39	-0.0557761	0.733359	0.704646	K00344//NADPH2:quinone reductase [EC:1.6.5.5]	XP_714852.1|3.4e-216|NADPH:quinone reductase [Candida albicans SC5314]	GO:0033554//cellular response to stress;GO:0051716//cellular response to stimulus;GO:0050896//response to stimulus;GO:0062197//cellular response to chemical stress;GO:0006979//response to oxidative stress;GO:0034599//cellular response to oxidative stress;GO:0009987//cellular process;GO:0070887//cellular response to chemical stimulus;GO:0042221//response to chemical;GO:0006950//response to stress;…
3645981	CST5	XM_707309.2	Known_gene	1	987663	988814	NC_032094.1	+	1152	1152	110.87	80.72	61.29	43.45	46.73	51.28	84.293	47.153	0.82307	0.109911	0.02278	1.35144	7.78224e-92	1.6263e-92	0.391303	3.378e-07	2.13692e-07	0.65453	1.8678e-22	6.30864e-23	K11239//pheromone-response scaffold protein+ko04011//MAPK signaling pathway - yeast	XP_712402.2|6.7e-220|Cst5p [Candida albicans SC5314]	GO:0050794//regulation of cellular process;GO:0023052//signaling;GO:0051703//intraspecies interaction between organisms;GO:0090605//submerged biofilm formation;GO:0050896//response to stimulus;GO:0031139//positive regulation of conjugation with cellular fusion;GO:0000750//pheromone-dependent signal transduction involved in conjugation with cellular fusion;GO:1900190//regulation of single-species …
3638953	3638953	XM_714282.1	Known_gene	1	2215084	2216109	NC_032096.1	-	1026	1026	0.26	2.19	0.09	0.16	0.41	0.4	0.846	0.323	0.788351	0.53262	0.293132	0.70044	0.683051	0.656058	-2.18763	0.183429	0.163059	2.45286	9.09378e-05	5.61122e-05	NA	XP_719375.1|3.2e-197|hypothetical protein CAALFM_CR10380CA [Candida albicans SC5314]	NA
3644539	GIN1	XM_708699.2	Known_gene	1	2508110	2511814	NC_032089.1	-	3705	3705	0.91	3.18	1.42	2.08	1.57	3.33	1.836	2.326	-0.266517	0.787813	0.603433	-1.19265	3.14686e-06	2.04504e-06	-0.144874	0.601707	0.577088	-0.0664954	0.733932	0.705566	K11272//mediator of replication checkpoint protein 1+ko04111//Cell cycle - yeast	XP_713792.1|0.0e+00|chromatin-modulating protein [Candida albicans SC5314]	GO:0048523//negative regulation of cellular process;GO:0031570//DNA integrity checkpoint;GO:0065007//biological regulation;GO:0000075//cell cycle checkpoint;GO:0050896//response to stimulus;GO:0006950//response to stress;GO:0050789//regulation of biological process;GO:0048519//negative regulation of biological process;GO:0045786//negative regulation of cell cycle;GO:0006974//cellular response to …
BGI_novel_G000004	BGI_novel_G000004	BGI_novel_T000065	Novel_gene	1	990364	990863	NC_032090.1	-	500	500	8.26	5.9	11.78	11.24	4.76	10.07	8.646	8.69	-0.00209109	0.998449	0.996686	-0.444428	0.159726	0.139105	1.30731	0.00018671	0.000134544	-0.771277	0.0461238	0.0362108	NA	NA	NA
3641548	MRP17	XM_711693.1	Known_gene	1	77777	78136	NC_032093.1	-	360	360	148.77	119.2	182.12	103.27	138.39	124.14	150.03	121.933	0.314522	0.550164	0.310297	0.526662	1.54554e-06	9.90418e-07	0.39615	1.30322e-05	8.8579e-06	-0.0585838	0.664768	0.632708	K02990//small subunit ribosomal protein S6+ko03010//Ribosome	XP_002420349.1|4.9e-60|mitochondrial 37S ribosomal protein YmS16 [Candida dubliniensis CD36]	GO:0019538//protein metabolic process;GO:0044249//cellular biosynthetic process;GO:0034645//cellular macromolecule biosynthetic process;GO:0071704//organic substance metabolic process;GO:0044267//cellular protein metabolic process;GO:0009987//cellular process;GO:0006412//translation;GO:0043043//peptide biosynthetic process;GO:0043170//macromolecule metabolic process;GO:0008152//metabolic process;…
3642076	3642076	XM_711143.2	Known_gene	1	1796429	1800589	NC_032096.1	-	4161	4161	26.95	25.89	32.07	14.9	14.59	11.16	28.303	13.55	1.01397	0.00835763	0.000626092	0.854973	4.72311e-43	1.49634e-43	1.13624	1.26231e-78	2.46432e-79	1.21406	6.42555e-73	1.10242e-73	K14676//lysophospholipid hydrolase [EC:3.1.1.5]+ko00564//Glycerophospholipid metabolism	XP_716236.1|0.0e+00|lysophospholipase [Candida albicans SC5314]	GO:0044238//primary metabolic process;GO:0044419//interspecies interaction between organisms;GO:0071704//organic substance metabolic process;GO:1901575//organic substance catabolic process;GO:0008152//metabolic process;GO:0009405//pathogenesis;GO:0009056//catabolic process;GO:0016042//lipid catabolic process;GO:0006629//lipid metabolic process;GO:0042175//nuclear outer membrane-endoplasmic reticu…
3645320	3645320	XM_707922.2	Known_gene	1	2564631	2565422	NC_032089.1	-	792	792	0.12	0	0	1.12	2.37	0.22	0.04	1.236	-1.90763	0.0696544	0.0112129	-3.22239	0.00973082	0.0075246	-7.88874	2.24385e-06	1.4633e-06	-4.45943	0.33184	0.29381	NA	XP_713015.2|1.2e-154|hypothetical protein CAALFM_C111710CA [Candida albicans SC5314]	GO:0071852//fungal-type cell wall organization or biogenesis;GO:0016043//cellular component organization;GO:0071555//cell wall organization;GO:0071554//cell wall organization or biogenesis;GO:0031505//fungal-type cell wall organization;GO:0009987//cellular process;GO:0045229//external encapsulating structure organization;GO:0071840//cellular component organization or biogenesis;GO:0110165//cellul…
3647141	NHX1	XM_706161.1	Known_gene	1	103938	105929	NC_032094.1	-	1992	1992	64.7	72.6	62.27	61.2	79.62	83.07	66.523	74.63	-0.142486	0.817992	0.644099	0.0802341	0.139001	0.119868	-0.354594	2.9086e-12	1.56553e-12	-0.194358	0.00015252	9.5597e-05	K12041//solute carrier family 9 (sodium/hydrogen exchanger), member 6/7	XP_711253.1|0.0e+00|bifunctional K:H/Na:H antiporter [Candida albicans SC5314]	GO:0098660//inorganic ion transmembrane transport;GO:0034220//ion transmembrane transport;GO:0051179//localization;GO:0050801//ion homeostasis;GO:0098655//cation transmembrane transport;GO:0030003//cellular cation homeostasis;GO:0006812//cation transport;GO:0009987//cellular process;GO:0006811//ion transport;GO:0051452//intracellular pH reduction;GO:0045851//pH reduction;GO:0006813//potassium ion…
3634929	RTG1	XM_718316.1	Known_gene	1	1889477	1890301	NC_032089.1	+	825	825	59.64	45.35	94.65	75.23	90.62	68.49	66.546	78.113	-0.2373	0.701513	0.487801	-0.335028	6.44252e-05	4.41332e-05	0.062773	0.326016	0.29961	-0.594791	1.0774e-09	5.24488e-10	NA	XP_723409.1|1.1e-150|Rtg1p [Candida albicans SC5314]	GO:0071704//organic substance metabolic process;GO:2001141//regulation of RNA biosynthetic process;GO:0031669//cellular response to nutrient levels;GO:0051716//cellular response to stimulus;GO:1901575//organic substance catabolic process;GO:1902680//positive regulation of RNA biosynthetic process;GO:0044419//interspecies interaction between organisms;GO:0031670//cellular response to nutrient;GO:0…
3643751	3643751	XM_709508.2	Known_gene	1	427195	427842	NC_032093.1	-	648	648	69.59	57.08	54.05	52.94	43.8	52.65	60.24	49.796	0.29535	0.601626	0.364163	0.394522	0.000127722	8.85626e-05	0.303364	0.00677437	0.00532062	0.116552	0.142451	0.119112	NA	XP_714601.2|3.0e-116|hypothetical protein CAALFM_C501880CA [Candida albicans SC5314]	GO:0051179//localization;GO:0008104//protein localization;GO:0042886//amide transport;GO:0033036//macromolecule localization;GO:0009987//cellular process;GO:0015031//protein transport;GO:0051234//establishment of localization;GO:0016192//vesicle-mediated transport;GO:0015833//peptide transport;GO:0071705//nitrogen compound transport;GO:0045184//establishment of protein localization;GO:0071702//or…
3640116	IFU5	XM_713141.1	Known_gene	1	395478	396188	NC_032096.1	+	711	711	646.42	568.47	447.83	388.05	528.73	423.76	554.24	446.846	0.329713	0.569762	0.328559	0.736229	7.7649e-110	1.48095e-110	-0.23958	5.70042e-11	3.18816e-11	0.423837	2.56458e-44	6.01174e-45	K17095//annexin A7/11	XP_718234.1|8.8e-146|Ifu5p [Candida albicans SC5314]	GO:0071554//cell wall organization or biogenesis;GO:0044182//filamentous growth of a population of unicellular organisms;GO:0009987//cellular process;GO:0030447//filamentous growth;GO:0071852//fungal-type cell wall organization or biogenesis;GO:0040007//growth;GO:0042710//biofilm formation;GO:0051703//intraspecies interaction between organisms;GO:0098743//cell aggregation;GO:0044010//single-speci…
3638814	CDH1	XM_714437.1	Known_gene	1	66331	68124	NC_032090.1	-	1794	1794	57.13	50.33	32.8	53.9	57.24	70.96	46.753	60.7	-0.316782	0.617022	0.382072	0.0839633	0.169763	0.148472	-0.803328	2.56444e-32	8.98926e-33	-0.495587	2.63315e-17	1.01769e-17	K03364//cell division cycle 20-like protein 1, cofactor of APC complex+ko04120//Ubiquitin mediated proteolysis+ko04111//Cell cycle - yeast	XP_719530.1|0.0e+00|Cdh1p [Candida albicans SC5314]	GO:0033047//regulation of mitotic sister chromatid segregation;GO:0051443//positive regulation of ubiquitin-protein transferase activity;GO:1901990//regulation of mitotic cell cycle phase transition;GO:0045839//negative regulation of mitotic nuclear division;GO:0065009//regulation of molecular function;GO:0051130//positive regulation of cellular component organization;GO:0080090//regulation of pr…
3640236	3640236	XM_713058.2	Known_gene	1	272374	274197	NC_032089.1	-	1824	1824	130.55	132.94	151.1	129.72	267.29	226.98	138.196	207.996	-0.554834	0.306997	0.115092	0.00920153	0.831922	0.813116	-0.822902	1.8199e-154	2.08796e-155	-0.77179	3.24082e-118	3.98636e-119	K19815//high-osmolarity-induced transcription protein 1+ko04011//MAPK signaling pathway - yeast	XP_718151.2|0.0e+00|hypothetical protein CAALFM_C101390CA [Candida albicans SC5314]	GO:0045935//positive regulation of nucleobase-containing compound metabolic process;GO:0010570//regulation of filamentous growth;GO:0051171//regulation of nitrogen compound metabolic process;GO:0060962//regulation of ribosomal protein gene transcription by RNA polymerase II;GO:0031323//regulation of cellular metabolic process;GO:0048518//positive regulation of biological process;GO:0065007//biolo…
3639866	3639866	XM_713388.2	Known_gene	1	1226686	1229604	NC_032089.1	+	2919	2919	100.31	75.58	71.38	54.01	64.85	76.97	82.423	65.276	0.340672	0.542513	0.301828	0.893167	1.06287e-116	1.95596e-117	0.138413	0.000793801	0.000592434	-0.0262917	0.67597	0.645074	NA	XP_718481.2|0.0e+00|hypothetical protein CAALFM_C105900WA [Candida albicans SC5314]	GO:0016021//integral component of membrane;GO:0110165//cellular anatomical entity;GO:0031224//intrinsic component of membrane;GO:0016020//membrane;
3636435	3636435	XM_716786.2	Known_gene	1	1058090	1058830	NC_032093.1	-	741	741	121.36	99.1	131.19	74.63	91.11	144.28	117.216	103.34	0.187817	0.776828	0.587214	0.701465	3.94995e-21	1.7448e-21	0.525976	2.6519e-14	1.34012e-14	-0.541914	4.66025e-14	1.96872e-14	NA	XP_721879.2|1.9e-135|hypothetical protein CAALFM_C504840CA [Candida albicans SC5314]	GO:0042254//ribosome biogenesis;GO:0009987//cellular process;GO:0071840//cellular component organization or biogenesis;GO:0042274//ribosomal small subunit biogenesis;GO:0044085//cellular component biogenesis;GO:0022613//ribonucleoprotein complex biogenesis;GO:0030686//90S preribosome;GO:1990904//ribonucleoprotein complex;GO:0032991//protein-containing complex;GO:0030684//preribosome;
3642465	3642465	XM_710787.2	Known_gene	1	1101241	1102398	NC_032089.1	-	1158	1158	174.48	169.22	247.93	107.51	101.4	121.85	197.21	110.253	0.80566	0.0333061	0.00386455	0.698591	2.73543e-49	8.0936e-50	1.28988	1.14395e-186	1.11567e-187	0.473794	8.35928e-27	2.56074e-27	NA	XP_715880.2|7.9e-229|hypothetical protein CAALFM_C105210CA [Candida albicans SC5314]	GO:0031224//intrinsic component of membrane;GO:0016021//integral component of membrane;GO:0110165//cellular anatomical entity;GO:0016020//membrane;
3646987	3646987	XM_706339.1	Known_gene	1	813516	814376	NC_032093.1	-	861	861	338.47	312.65	383.85	167	162.18	238.24	344.99	189.14	0.846399	0.0359693	0.00428862	1.01918	2.09378e-126	3.63572e-127	1.24295	1.62157e-193	1.50566e-194	0.392133	1.84993e-26	5.7105e-27	K01792//glucose-6-phosphate 1-epimerase [EC:5.1.3.15]+ko00010//Glycolysis / Gluconeogenesis+ko01100//Metabolic pathways+ko01130//Biosynthesis of antibiotics+ko01110//Biosynthesis of secondary metabolites;K18622//adducin	XP_711431.1|6.4e-167|hypothetical protein CAALFM_C503670CA [Candida albicans SC5314]	GO:0030834//regulation of actin filament depolymerization;GO:0030029//actin filament-based process;GO:0031333//negative regulation of protein-containing complex assembly;GO:0048523//negative regulation of cellular process;GO:0032956//regulation of actin cytoskeleton organization;GO:1901880//negative regulation of protein depolymerization;GO:0010639//negative regulation of organelle organization;G…
3645008	OPT7	XM_708261.2	Known_gene	1	69499	71742	NC_032092.1	-	2244	2244	0.21	1.3	0.19	0.14	0.21	0.27	0.566	0.206	1.00002	0.377453	0.162493	0.584963	0.542676	0.511326	-0.14439	0.924706	0.918992	2.26748	8.4463e-06	4.91932e-06	NA	XP_713354.2|0.0e+00|Opt7p [Candida albicans SC5314]	GO:0051234//establishment of localization;GO:0006857//oligopeptide transport;GO:0042886//amide transport;GO:0015711//organic anion transport;GO:0035672//oligopeptide transmembrane transport;GO:0034220//ion transmembrane transport;GO:0071702//organic substance transport;GO:0042939//tripeptide transport;GO:0072337//modified amino acid transport;GO:0051179//localization;GO:0055085//transmembrane tra…
3636162	3636162	XM_717064.1	Known_gene	1	2879441	2880202	NC_032089.1	+	762	762	4.14	2.11	1.56	0.94	0.83	0.68	2.603	0.816	1.30341	0.163254	0.0424237	2.1389	3.8541e-05	2.61694e-05	0.910363	0.196668	0.175451	1.63364	0.0145354	0.0108106	NA	XP_722157.1|2.4e-141|hypothetical protein CAALFM_C113180WA [Candida albicans SC5314]	NA
3641726	CHS4	XM_711497.1	Known_gene	1	1275033	1277288	NC_032091.1	+	2256	2256	142.91	133.62	124.91	174.04	184.96	223.68	133.813	194.226	-0.498419	0.266016	0.0904208	-0.284312	1.68495e-20	7.5332e-21	-0.566324	2.23849e-70	4.72146e-71	-0.7433	1.02288e-137	1.15849e-138	K07126//uncharacterized protein	XP_716590.1|0.0e+00|Chs4p [Candida albicans SC5314]	GO:0006022//aminoglycan metabolic process;GO:0009059//macromolecule biosynthetic process;GO:0009987//cellular process;GO:0071554//cell wall organization or biogenesis;GO:0046349//amino sugar biosynthetic process;GO:0006037//cell wall chitin metabolic process;GO:0071840//cellular component organization or biogenesis;GO:1901071//glucosamine-containing compound metabolic process;GO:0043170//macromol…
3641808	CGT1	XM_711476.2	Known_gene	1	1270621	1271970	NC_032092.1	+	1350	1350	102.93	115.43	52.96	86.4	100.04	107.81	90.44	98.083	-0.0622401	0.942671	0.875131	0.25256	1.95463e-06	1.25781e-06	-0.917602	1.04507e-50	2.74706e-51	0.0985272	0.0178089	0.0133589	K00987//mRNA guanylyltransferase [EC:2.7.7.50]	XP_716569.2|2.5e-266|mRNA guanylyltransferase [Candida albicans SC5314]	GO:0006370//7-methylguanosine mRNA capping;GO:0006397//mRNA processing;GO:0006139//nucleobase-containing compound metabolic process;GO:0046483//heterocycle metabolic process;GO:0034641//cellular nitrogen compound metabolic process;GO:0016070//RNA metabolic process;GO:0043170//macromolecule metabolic process;GO:0006396//RNA processing;GO:0090304//nucleic acid metabolic process;GO:0009452//7-methyl…
3647972	ALS4	BGI_novel_T000222,BGI_novel_T000220,XM_705333.2,BGI_novel_T000221,BGI_novel_T000219,BGI_novel_T000228,BGI_novel_T000225,BGI_novel_T000227,BGI_novel_T000233,BGI_novel_T000226,BGI_novel_T000229,BGI_novel_T000224,BGI_novel_T000231,BGI_novel_T000232,BGI_novel_T000230,BGI_novel_T000223	Known_gene	16	898052	904754	NC_032094.1	-	6703	6303	14.57	24.78	50.62	154.35	70.1	51.09	29.99	91.846	-1.50123	0.0186728	0.00179361	-3.40513	0	0	-0.469707	2.17761e-54	5.40038e-55	-1.04386	1.82971e-135	2.09382e-136	K22493//agglutinin-like protein;K22493//agglutinin-like protein;K22493//agglutinin-like protein;K22493//agglutinin-like protein;K22493//agglutinin-like protein;K22493//agglutinin-like protein;K22493//agglutinin-like protein;K22493//agglutinin-like protein;K22493//agglutinin-like protein;K22493//agglutinin-like protein;K22493//agglutinin-like protein;K22493//agglutinin-like protein;K22493//aggluti…	XP_710425.2|0.0e+00|Als4p [Candida albicans SC5314]	GO:0022610//biological adhesion;GO:0044403//symbiotic process;GO:0090605//submerged biofilm formation;GO:0044419//interspecies interaction between organisms;GO:0098630//aggregation of unicellular organisms;GO:0090608//multi-species submerged biofilm formation;GO:0044406//adhesion of symbiont to host;GO:0009405//pathogenesis;GO:0098609//cell-cell adhesion;GO:0098743//cell aggregation;GO:0051703//i…
3636465	3636465	XM_716826.1	Known_gene	1	1137147	1138370	NC_032093.1	+	1224	1224	0.56	0.65	0.97	1.75	1.69	1.24	0.726	1.56	-0.906175	0.322898	0.124225	-1.64386	0.00348476	0.00260832	-0.800967	0.123934	0.108039	-0.931828	0.138592	0.115653	K01956//carbamoyl-phosphate synthase small subunit [EC:6.3.5.5]+ko00250//Alanine, aspartate and glutamate metabolism+ko01100//Metabolic pathways+ko00240//Pyrimidine metabolism	XP_721919.1|1.2e-238|hypothetical protein CAALFM_C505180WA [Candida albicans SC5314]	GO:0009056//catabolic process;GO:0008152//metabolic process;GO:0016787//hydrolase activity;GO:0003824//catalytic activity;
3642335	IFM3	XM_710924.2	Known_gene	1	1640824	1641633	NC_032090.1	-	810	810	74.99	73.44	38.96	65.25	55.35	68.66	62.463	63.086	0.0386045	0.965943	0.920948	0.20072	0.0176987	0.0139468	-0.50659	1.83536e-06	1.19445e-06	0.0970962	0.119607	0.0987046	K00015//glyoxylate reductase [EC:1.1.1.26]+ko01100//Metabolic pathways+ko01110//Biosynthesis of secondary metabolites+ko00630//Glyoxylate and dicarboxylate metabolism	XP_716017.2|1.4e-152|Ifm3p [Candida albicans SC5314]	GO:0005622//intracellular;GO:0005829//cytosol;GO:0005737//cytoplasm;GO:0110165//cellular anatomical entity;GO:0000166//nucleotide binding;GO:0005488//binding;GO:0097159//organic cyclic compound binding;GO:0036094//small molecule binding;GO:0016614//oxidoreductase activity, acting on CH-OH group of donors;GO:0016491//oxidoreductase activity;GO:0016616//oxidoreductase activity, acting on the CH-OH …
3635730	HSK3	XM_717438.1	Known_gene	1	309725	310045	NC_032090.1	+	321	321	53.3	26.35	27.13	23.69	23.44	25.85	35.593	24.326	0.558078	0.446535	0.216919	1.16986	2.03664e-07	1.26284e-07	0.210916	0.376472	0.348872	0.0276387	0.562427	0.522544	NA	XP_722531.1|5.2e-53|Hsk3p [Candida albicans SC5314]	GO:0008608//attachment of spindle microtubules to kinetochore;GO:0007017//microtubule-based process;GO:0007049//cell cycle;GO:0007051//spindle organization;GO:0022402//cell cycle process;GO:0007059//chromosome segregation;GO:1902850//microtubule cytoskeleton organization involved in mitosis;GO:1903047//mitotic cell cycle process;GO:0007010//cytoskeleton organization;GO:0016043//cellular component…
3640407	HSE1	XM_712831.1	Known_gene	1	278915	280411	NC_032096.1	-	1497	1497	107.11	76.65	86.79	62.89	66.68	103.2	90.183	77.59	0.225702	0.715604	0.506727	0.768191	9.61808e-48	2.88768e-48	0.380275	7.40025e-12	4.03504e-12	-0.429085	1.29279e-15	5.2159e-16	K04705//signal transducing adaptor molecule+ko04144//Endocytosis	XP_717924.1|1.0e-284|ESCRT-0 subunit protein [Candida albicans SC5314]	GO:0034613//cellular protein localization;GO:0006810//transport;GO:0006886//intracellular protein transport;GO:0009987//cellular process;GO:0051649//establishment of localization in cell;GO:0046907//intracellular transport;GO:0071702//organic substance transport;GO:0071705//nitrogen compound transport;GO:0045184//establishment of protein localization;GO:0015833//peptide transport;GO:0033036//macr…
3640113	SPC98	XM_713172.2	Known_gene	1	433224	435581	NC_032096.1	-	2358	2358	14.99	16.37	11.89	7.25	14.78	18.94	14.416	13.656	0.0972285	0.915737	0.815118	1.04795	2.16693e-19	9.90578e-20	-0.313898	0.00393795	0.00304948	-0.210382	0.0328935	0.0254094	K16570//gamma-tubulin complex component 3	XP_718265.2|0.0e+00|Spc98p [Candida albicans SC5314]	GO:0031122//cytoplasmic microtubule organization;GO:0070925//organelle assembly;GO:0097435//supramolecular fiber organization;GO:0007049//cell cycle;GO:0016043//cellular component organization;GO:0000003//reproduction;GO:0022402//cell cycle process;GO:0007051//spindle organization;GO:0046785//microtubule polymerization;GO:0007010//cytoskeleton organization;GO:0006996//organelle organization;GO:00…
3637848	3637848	XM_715417.2	Known_gene	1	488934	493196	NC_032092.1	+	4263	4263	5.05	11.5	10.13	16.28	15.04	18.04	8.893	16.453	-0.831387	0.115325	0.0247034	-1.68875	1.49442e-76	3.49082e-77	-0.57017	1.48188e-12	7.89692e-13	-0.649565	2.00102e-18	7.51516e-19	K14401//cleavage and polyadenylation specificity factor subunit 1+ko03015//mRNA surveillance pathway	XP_720510.2|0.0e+00|hypothetical protein CAALFM_C402430WA [Candida albicans SC5314]	GO:0031123//RNA 3'-end processing;GO:0006396//RNA processing;GO:1901360//organic cyclic compound metabolic process;GO:0034641//cellular nitrogen compound metabolic process;GO:0046483//heterocycle metabolic process;GO:0042221//response to chemical;GO:0010467//gene expression;GO:0071704//organic substance metabolic process;GO:0006378//mRNA polyadenylation;GO:0009987//cellular process;GO:0090304//nu…
3644034	TOP1	XM_709212.2	Known_gene	1	186531	188873	NC_032094.1	-	2343	2343	69.63	177.82	53.65	132.63	111.54	121.35	100.366	121.84	-0.20605	0.823774	0.652573	-0.929626	2.86855e-130	4.87538e-131	-1.05591	7.75941e-129	1.01852e-129	0.551243	4.32292e-73	7.40948e-74	K03163//DNA topoisomerase I [EC:5.99.1.2]	XP_714305.1|0.0e+00|DNA topoisomerase 1 [Candida albicans SC5314]	GO:0071103//DNA conformation change;GO:0043170//macromolecule metabolic process;GO:0044419//interspecies interaction between organisms;GO:0006139//nucleobase-containing compound metabolic process;GO:0009987//cellular process;GO:0044238//primary metabolic process;GO:0006325//chromatin organization;GO:0044249//cellular biosynthetic process;GO:0071840//cellular component organization or biogenesis;G…
3640726	IRE1	XM_712513.2	Known_gene	1	1731592	1735263	NC_032089.1	-	3672	3672	36.47	41.86	31.77	59.39	51.18	57.13	36.7	55.9	-0.560441	0.223539	0.0683975	-0.70351	8.82482e-59	2.38944e-59	-0.687915	8.79857e-47	2.43474e-47	-0.448676	7.98091e-25	2.54944e-25	K08852//serine/threonine-protein kinase/endoribonuclease IRE1 [EC:2.7.11.1 3.1.26.-]+ko04141//Protein processing in endoplasmic reticulum	XP_717606.2|0.0e+00|bifunctional endoribonuclease/protein kinase [Candida albicans SC5314]	GO:0034641//cellular nitrogen compound metabolic process;GO:0010467//gene expression;GO:0006950//response to stress;GO:0007165//signal transduction;GO:0065007//biological regulation;GO:0044238//primary metabolic process;GO:0012501//programmed cell death;GO:0016071//mRNA metabolic process;GO:0006139//nucleobase-containing compound metabolic process;GO:0050789//regulation of biological process;GO:0…
3638848	3638848	XM_714419.1	Known_gene	1	99682	100710	NC_032090.1	-	1029	1029	3.65	7.51	9.56	379.85	21.03	93.85	6.906	164.91	-3.5836	4.68463e-07	5.38105e-09	-6.70139	0	0	-1.13737	3.65844e-12	1.97585e-12	-3.64347	1.46475e-219	1.20606e-220	K01477//allantoicase [EC:3.5.3.4]+ko00230//Purine metabolism+ko01100//Metabolic pathways	XP_719512.1|1.4e-197|allantoicase [Candida albicans SC5314]	GO:0043603//cellular amide metabolic process;GO:1901565//organonitrogen compound catabolic process;GO:1901361//organic cyclic compound catabolic process;GO:1901564//organonitrogen compound metabolic process;GO:1901575//organic substance catabolic process;GO:0008152//metabolic process;GO:0071704//organic substance metabolic process;GO:0006807//nitrogen compound metabolic process;GO:0044237//cellul…
3641643	3641643	XM_019475451.1,BGI_novel_T000191	Known_gene	2	266126	268018	NC_032094.1	-	1893	1723	25.07	27.27	41.3	36.55	31.01	36.83	31.213	34.796	-0.161822	0.780275	0.591798	-0.543909	2.18732e-11	1.20098e-11	0.413408	4.03537e-08	2.47392e-08	-0.433567	2.05662e-07	1.10624e-07	K01094//phosphatidylglycerophosphatase GEP4 [EC:3.1.3.27]+ko01100//Metabolic pathways+ko00564//Glycerophospholipid metabolism	XP_019330996.1|2.1e-117|hypothetical protein CAALFM_C601330CA [Candida albicans SC5314]	GO:0006644//phospholipid metabolic process;GO:0044237//cellular metabolic process;GO:1901576//organic substance biosynthetic process;GO:0071704//organic substance metabolic process;GO:0008654//phospholipid biosynthetic process;GO:0009058//biosynthetic process;GO:0032049//cardiolipin biosynthetic process;GO:0046474//glycerophospholipid biosynthetic process;GO:0046471//phosphatidylglycerol metaboli…
3643165	3643165	XM_710105.1	Known_gene	1	924629	926377	NC_032095.1	-	1749	1749	38.66	51.82	71.6	14.75	47.01	41.07	54.026	34.276	0.57886	0.406621	0.185812	1.39013	6.87459e-54	1.94082e-54	0.606992	3.11295e-25	1.23936e-25	0.335424	1.07769e-07	5.71354e-08	NA	XP_715198.1|0.0e+00|hypothetical protein CAALFM_C704240CA [Candida albicans SC5314]	NA
3640387	ATP3	XM_019475510.1,BGI_novel_T000256	Known_gene	2	310698	313136	NC_032096.1	+	2439	2102	207.89	142.19	717.49	377.69	300.32	213.13	355.856	297.046	0.0976207	0.917892	0.820709	-0.861382	1.53019e-133	2.5674e-134	1.25646	0	0	-0.583914	3.13123e-97	4.37772e-98	K02136//F-type H+-transporting ATPase subunit gamma+ko01100//Metabolic pathways+ko00190//Oxidative phosphorylation;K02136//F-type H+-transporting ATPase subunit gamma+ko01100//Metabolic pathways+ko00190//Oxidative phosphorylation	XP_019331055.1|1.1e-156|F1F0 ATP synthase subunit gamma [Candida albicans SC5314]	GO:0009259//ribonucleotide metabolic process;GO:0008152//metabolic process;GO:0006811//ion transport;GO:0009201//ribonucleoside triphosphate biosynthetic process;GO:0046483//heterocycle metabolic process;GO:0090407//organophosphate biosynthetic process;GO:0044238//primary metabolic process;GO:0006812//cation transport;GO:0009145//purine nucleoside triphosphate biosynthetic process;GO:0006753//nuc…
3639872	3639872	XM_713377.1	Known_gene	1	1257107	1259197	NC_032089.1	+	2091	2091	65.38	62.32	43.02	50.15	42.02	65.37	56.906	52.513	0.143704	0.842581	0.685053	0.3826	6.06361e-13	3.19832e-13	0.0339314	0.569805	0.543066	-0.0689335	0.293777	0.258036	K13711//phosphatidylinositol 4-kinase type 2 [EC:2.7.1.67]+ko01100//Metabolic pathways+ko04070//Phosphatidylinositol signaling system+ko00562//Inositol phosphate metabolism	XP_718470.1|0.0e+00|1-phosphatidylinositol 4-kinase [Candida albicans SC5314]	GO:0046488//phosphatidylinositol metabolic process;GO:0044238//primary metabolic process;GO:0006996//organelle organization;GO:0044237//cellular metabolic process;GO:0046854//phosphatidylinositol phosphorylation;GO:0045927//positive regulation of growth;GO:0050789//regulation of biological process;GO:0040007//growth;GO:0070783//growth of unicellular organism as a thread of attached cells;GO:19004…
3646682	3646682	XM_706599.2	Known_gene	1	1235775	1236602	NC_032096.1	-	828	828	49.15	51	89.88	58.22	38.59	53.88	63.343	50.23	0.30586	0.608297	0.371236	-0.244323	0.00982225	0.00760024	1.21977	3.95117e-43	1.15407e-43	-0.0792526	0.665029	0.63318	K11290//template-activating factor I	XP_711691.2|6.8e-158|hypothetical protein CAALFM_CR05890CA [Candida albicans SC5314]	GO:0034728//nucleosome organization;GO:0006334//nucleosome assembly;GO:0006333//chromatin assembly or disassembly;GO:0043933//protein-containing complex subunit organization;GO:0009987//cellular process;GO:0006996//organelle organization;GO:0016043//cellular component organization;GO:0065004//protein-DNA complex assembly;GO:0006323//DNA packaging;GO:0031497//chromatin assembly;GO:0006325//chromat…
3643907	3643907	XM_709361.1	Known_gene	1	1759736	1761676	NC_032090.1	-	1941	1941	19.14	16.43	20.21	51.51	33.48	23.17	18.593	36.053	-0.890859	0.0921495	0.0171659	-1.42826	1.49406e-82	3.34238e-83	-0.72823	5.3011e-18	2.42126e-18	-0.495926	5.48843e-07	3.0066e-07	NA	XP_714454.1|0.0e+00|hypothetical protein CAALFM_C208660CA [Candida albicans SC5314]	GO:0016021//integral component of membrane;GO:0016020//membrane;GO:0110165//cellular anatomical entity;GO:0031224//intrinsic component of membrane;
3636885	DAO1	XM_716470.2	Known_gene	1	758553	759638	NC_032089.1	-	1086	1086	64.31	49.54	121.86	103.63	65.36	68.94	78.57	79.31	-0.0404312	0.96247	0.915043	-0.688327	3.53383e-27	1.41483e-27	0.898745	1.24213e-48	3.34388e-49	-0.476747	3.48565e-09	1.7314e-09	K00273//D-amino-acid oxidase [EC:1.4.3.3]+ko00311//Penicillin and cephalosporin biosynthesis+ko04146//Peroxisome+ko00330//Arginine and proline metabolism+ko01100//Metabolic pathways+ko01130//Biosynthesis of antibiotics+ko00260//Glycine, serine and threonine metabolism+ko00472//D-Arginine and D-ornithine metabolism	XP_721563.2|1.0e-206|Dao1p [Candida albicans SC5314]	GO:1901605//alpha-amino acid metabolic process;GO:0008152//metabolic process;GO:0044237//cellular metabolic process;GO:0006082//organic acid metabolic process;GO:0019752//carboxylic acid metabolic process;GO:0071704//organic substance metabolic process;GO:0043436//oxoacid metabolic process;GO:1901564//organonitrogen compound metabolic process;GO:0009987//cellular process;GO:0006520//cellular amin…
3637799	3637799	XM_715559.2	Known_gene	1	709951	711870	NC_032093.1	+	1920	1920	392.51	325.85	471.81	180.01	190.46	195.13	396.723	188.533	1.03299	0.00261135	0.00014737	1.12465	0	0	1.30872	0	0	0.739772	2.28222e-180	2.15528e-181	K08286//protein-serine/threonine kinase [EC:2.7.11.-]	XP_720652.2|0.0e+00|serine/threonine protein kinase [Candida albicans SC5314]	GO:0050789//regulation of biological process;GO:0009987//cellular process;GO:0065007//biological regulation;GO:0006793//phosphorus metabolic process;GO:0036211//protein modification process;GO:0006464//cellular protein modification process;GO:0019538//protein metabolic process;GO:0071704//organic substance metabolic process;GO:0006796//phosphate-containing compound metabolic process;GO:0044238//p…
3644011	GPX1	XM_709203.2	Known_gene	1	169118	169807	NC_032094.1	+	690	690	25.36	27.96	39.85	15.44	16.37	19.47	31.056	17.093	0.817933	0.0863524	0.0155541	0.715882	3.48272e-05	2.35894e-05	1.28353	1.97724e-17	9.16634e-18	0.522111	0.000401556	0.000258842	K00432//glutathione peroxidase [EC:1.11.1.9]+ko00590//Arachidonic acid metabolism+ko00480//Glutathione metabolism	XP_714296.2|1.0e-127|Gpx1p [Candida albicans SC5314]	GO:0006979//response to oxidative stress;GO:0050896//response to stimulus;GO:0006950//response to stress;GO:0004601//peroxidase activity;GO:0003824//catalytic activity;GO:0016684//oxidoreductase activity, acting on peroxide as acceptor;GO:0016491//oxidoreductase activity;GO:0004602//glutathione peroxidase activity;GO:0016209//antioxidant activity;
30515176	30515176	XM_019475283.1	Known_gene	1	221731	221955	NC_032091.1	+	225	225	24.37	16.02	55.75	20.29	31.26	56.34	32.046	35.963	-0.130646	0.914493	0.81158	0.264337	0.537826	0.506216	0.834654	0.00313822	0.00241708	-1.81429	2.67839e-06	1.51855e-06	K18174//cytochrome c oxidase assembly factor 2	XP_019330828.1|9.9e-35|hypothetical protein CAALFM_C301090WA [Candida albicans SC5314]	GO:0071840//cellular component organization or biogenesis;GO:0017004//cytochrome complex assembly;GO:0034622//cellular protein-containing complex assembly;GO:0044085//cellular component biogenesis;GO:0007005//mitochondrion organization;GO:0033108//mitochondrial respiratory chain complex assembly;GO:0016043//cellular component organization;GO:0009987//cellular process;GO:0043933//protein-containin…
3646562	GIT1	XM_706749.1	Known_gene	1	1334165	1335724	NC_032090.1	-	1560	1560	0.11	0.17	0.06	0.05	0.15	0	0.113	0.066	0.236125	0.8754	0.740469	1.1375	0.628468	0.599844	-1.32193	0.471823	0.443772	4.08746	0.120546	0.0995606	K08176//MFS transporter, PHS family, inorganic phosphate transporter	XP_711841.1|4.1e-305|Git1p [Candida albicans SC5314]	GO:0001407//glycerophosphodiester transmembrane transport;GO:0006810//transport;GO:0046323//glucose import;GO:0015748//organophosphate ester transport;GO:0015711//organic anion transport;GO:0006820//anion transport;GO:0009987//cellular process;GO:0071702//organic substance transport;GO:0009405//pathogenesis;GO:0006811//ion transport;GO:0008645//hexose transmembrane transport;GO:0034220//ion trans…
3641148	3641148	XM_712091.2	Known_gene	1	1069560	1071119	NC_032092.1	+	1560	1560	73.11	61.95	108.47	114.7	78.92	97.47	81.176	97.03	-0.257477	0.644142	0.414451	-0.649725	4.06382e-40	1.33442e-40	0.458833	1.09467e-20	4.74394e-21	-0.653854	1.44187e-32	3.99294e-33	K14855//ribosome assembly protein 4	XP_717184.2|2.7e-309|hypothetical protein CAALFM_C405010WA [Candida albicans SC5314]	GO:0009987//cellular process;GO:0071840//cellular component organization or biogenesis;GO:0043933//protein-containing complex subunit organization;GO:0042221//response to chemical;GO:0070887//cellular response to chemical stimulus;GO:0006996//organelle organization;GO:0042273//ribosomal large subunit biogenesis;GO:0022607//cellular component assembly;GO:0050896//response to stimulus;GO:0016043//c…
3634814	3634814	XM_718466.2	Known_gene	1	2208542	2209030	NC_032089.1	+	489	489	83.01	82.46	68.47	44.08	34.62	68.22	77.98	48.973	0.675107	0.23577	0.0748487	0.913161	1.24893e-13	6.4768e-14	0.983866	5.96634e-13	3.13462e-13	0.2735	0.00226908	0.00155949	K13172//serine/arginine repetitive matrix protein 2	XP_723559.2|1.1e-86|U2-type spliceosomal complex subunit [Candida albicans SC5314]	GO:0010467//gene expression;GO:1901360//organic cyclic compound metabolic process;GO:0071704//organic substance metabolic process;GO:0043170//macromolecule metabolic process;GO:0006725//cellular aromatic compound metabolic process;GO:0090304//nucleic acid metabolic process;GO:0006807//nitrogen compound metabolic process;GO:0006139//nucleobase-containing compound metabolic process;GO:0046483//hete…
3646619	3646619	XM_706679.2	Known_gene	1	1424764	1426245	NC_032096.1	-	1482	1482	239.04	158.66	385.79	439.66	515.44	301.84	261.163	418.98	-0.667736	0.239577	0.0768147	-0.879136	5.19746e-238	5.92678e-239	-0.417989	2.9946e-70	6.32626e-71	-0.927846	1.09629e-170	1.06847e-171	NA	XP_711771.2|2.7e-282|hypothetical protein CAALFM_CR06640CA [Candida albicans SC5314]	GO:0065003//protein-containing complex assembly;GO:0048308//organelle inheritance;GO:0071840//cellular component organization or biogenesis;GO:0006996//organelle organization;GO:0007010//cytoskeleton organization;GO:0010256//endomembrane system organization;GO:0000921//septin ring assembly;GO:0048309//endoplasmic reticulum inheritance;GO:0034622//cellular protein-containing complex assembly;GO:00…
3638535	BMT1	XM_714785.1	Known_gene	1	1643662	1645716	NC_032091.1	-	2055	2055	39.69	57.59	47.7	30.5	31.47	65.3	48.326	42.423	0.195424	0.794843	0.613985	0.379966	3.87025e-08	2.33498e-08	0.600012	6.93879e-20	3.06614e-20	-0.181265	0.00154516	0.00104145	K13682//beta-1,2-mannosyltransferase [EC:2.4.1.-]	EEQ44739.1|0.0e+00|conserved hypothetical protein [Candida albicans WO-1]	GO:0044255//cellular lipid metabolic process;GO:0034645//cellular macromolecule biosynthetic process;GO:0006629//lipid metabolic process;GO:0035268//protein mannosylation;GO:0044260//cellular macromolecule metabolic process;GO:0044249//cellular biosynthetic process;GO:0006807//nitrogen compound metabolic process;GO:0071555//cell wall organization;GO:0044036//cell wall macromolecule metabolic proc…
3640719	ADE5,7	XM_712506.2	Known_gene	1	1718492	1720900	NC_032089.1	-	2409	2409	40.78	68.5	64.39	81.24	63.19	54.92	57.89	66.45	-0.188308	0.770407	0.578799	-0.994328	2.3276e-92	4.85242e-93	0.0271404	0.545046	0.51783	0.318772	6.43015e-12	2.89362e-12	K11788//phosphoribosylamine--glycine ligase / phosphoribosylformylglycinamidine cyclo-ligase [EC:6.3.4.13 6.3.3.1]+ko00230//Purine metabolism+ko01100//Metabolic pathways+ko01130//Biosynthesis of antibiotics+ko01110//Biosynthesis of secondary metabolites	XP_717599.2|0.0e+00|bifunctional aminoimidazole ribotide synthase/glycinamide ribotide synthase [Candida albicans SC5314]	GO:1901564//organonitrogen compound metabolic process;GO:0050801//ion homeostasis;GO:0006793//phosphorus metabolic process;GO:0044238//primary metabolic process;GO:0055080//cation homeostasis;GO:1901135//carbohydrate derivative metabolic process;GO:0006796//phosphate-containing compound metabolic process;GO:0072521//purine-containing compound metabolic process;GO:0009112//nucleobase metabolic pro…
3638865	3638865	XM_714427.2	Known_gene	1	84801	86633	NC_032090.1	+	1833	1833	128.97	86.06	113.1	186.2	136.29	143.37	109.376	155.286	-0.472914	0.341154	0.136129	-0.529818	2.28122e-53	6.4823e-54	-0.269081	2.22107e-11	1.22552e-11	-0.736328	1.24775e-69	2.22042e-70	K03327//multidrug resistance protein, MATE family	XP_719520.1|0.0e+00|hypothetical protein CAALFM_C200540WA [Candida albicans SC5314]	GO:0110165//cellular anatomical entity;GO:0016020//membrane;GO:0031224//intrinsic component of membrane;GO:0016021//integral component of membrane;GO:0005215//transporter activity;GO:0015297//antiporter activity;GO:0022804//active transmembrane transporter activity;GO:0022857//transmembrane transporter activity;GO:0042910//xenobiotic transmembrane transporter activity;GO:0015291//secondary active…
3636923	TEM1	XM_019475077.1	Known_gene	1	641962	642642	NC_032089.1	-	681	603	9.19	3.97	7.55	3.17	9.28	3.68	6.903	5.376	0.304306	0.776828	0.587258	1.53558	2.26652e-05	1.52341e-05	-0.297648	0.365143	0.337946	0.109433	0.725912	0.697002	K06682//Gtp-binding protein of the ras superfamily involved in termination of M-phase+ko04111//Cell cycle - yeast	XP_019330622.1|1.1e-107|Ras family GTPase [Candida albicans SC5314]	GO:0001100//negative regulation of exit from mitosis;GO:1900180//regulation of protein localization to nucleus;GO:0000278//mitotic cell cycle;GO:0007165//signal transduction;GO:0065007//biological regulation;GO:0051270//regulation of cellular component movement;GO:0051128//regulation of cellular component organization;GO:0044772//mitotic cell cycle phase transition;GO:0007015//actin filament orga…
3647786	3647786	XM_705528.2	Known_gene	1	993261	994097	NC_032090.1	-	837	837	13.24	10.98	8.02	6.08	7.07	10.47	10.746	7.873	0.447639	0.544829	0.30493	1.12276	7.66669e-07	4.84624e-07	0.181892	0.461094	0.432834	0.0686166	0.644174	0.610942	NA	XP_710620.2|5.0e-156|hypothetical protein CAALFM_C204740CA [Candida albicans SC5314]	NA
3634782	MIR1	XM_718475.2	Known_gene	1	2236246	2237169	NC_032089.1	+	924	924	1279.88	1210.95	1610.64	738.52	995.62	519.51	1367.16	751.216	0.813081	0.0929965	0.0174165	0.7933	0	0	0.693967	0	0	1.22092	0	0	K15102//solute carrier family 25 (mitochondrial phosphate transporter), member 3	XP_723568.1|5.1e-170|Mir1p [Candida albicans SC5314]	GO:0051234//establishment of localization;GO:0015698//inorganic anion transport;GO:0009987//cellular process;GO:0006820//anion transport;GO:0035435//phosphate ion transmembrane transport;GO:0098661//inorganic anion transmembrane transport;GO:0051179//localization;GO:0006811//ion transport;GO:0055085//transmembrane transport;GO:0098660//inorganic ion transmembrane transport;GO:0098656//anion trans…
3638521	3638521	XM_714804.2	Known_gene	1	1599406	1600539	NC_032091.1	+	1134	1134	19.13	12.6	22.46	22.74	16.87	28.42	18.063	22.676	-0.307393	0.624407	0.392913	-0.249395	0.049713	0.0408476	0.412898	0.00143317	0.00108397	-1.17348	1.24789e-18	4.6531e-19	K20028//palmitoyltransferase ZDHHC2/15/20 [EC:2.3.1.225]	XP_719897.2|5.8e-224|palmitoyltransferase [Candida albicans SC5314]	GO:0044249//cellular biosynthetic process;GO:0043543//protein acylation;GO:0071705//nitrogen compound transport;GO:0015031//protein transport;GO:0043170//macromolecule metabolic process;GO:0018345//protein palmitoylation;GO:0044260//cellular macromolecule metabolic process;GO:0006464//cellular protein modification process;GO:0034613//cellular protein localization;GO:0051649//establishment of loca…
3647645	TOM70	XM_705657.1	Known_gene	1	563064	564953	NC_032095.1	+	1890	1890	115.25	109.32	211.2	161.99	164.82	142.66	145.256	156.49	-0.12916	0.845754	0.689238	-0.491138	3.9908e-42	1.27903e-42	0.357719	1.44603e-30	5.21614e-31	-0.384024	2.86845e-22	9.75592e-23	K17768//mitochondrial import receptor subunit TOM70	XP_710749.1|0.0e+00|protein channel [Candida albicans SC5314]	GO:0051179//localization;GO:0006605//protein targeting;GO:0006810//transport;GO:0051649//establishment of localization in cell;GO:0072594//establishment of protein localization to organelle;GO:0015031//protein transport;GO:0009987//cellular process;GO:0051234//establishment of localization;GO:0033036//macromolecule localization;GO:0015833//peptide transport;GO:0007005//mitochondrion organization;…
3636845	TSR2	XM_716403.1	Known_gene	1	638337	638966	NC_032089.1	-	630	630	21.07	48.48	160.86	70.92	55.4	66.76	76.803	64.36	0.161993	0.883907	0.754662	-1.751	5.47506e-42	1.75657e-42	1.53785	4.4183e-77	8.77314e-78	-0.461594	0.000141821	8.8629e-05	K14800//pre-rRNA-processing protein TSR2	XP_721496.1|3.4e-117|Tsr2p [Candida albicans SC5314]	GO:0016072//rRNA metabolic process;GO:0006725//cellular aromatic compound metabolic process;GO:0034470//ncRNA processing;GO:0030490//maturation of SSU-rRNA;GO:0046483//heterocycle metabolic process;GO:0006139//nucleobase-containing compound metabolic process;GO:0071840//cellular component organization or biogenesis;GO:0009987//cellular process;GO:0044237//cellular metabolic process;GO:0042254//ri…
3644792	3644792	XM_708468.1	Known_gene	1	1021667	1022368	NC_032089.1	-	702	702	0.54	0.14	3.75	0.26	2.49	0.76	1.476	1.17	0.117141	0.942671	0.87536	1.05445	0.459467	0.425846	0.590745	0.185448	0.164977	-2.44057	0.118968	0.0980772	NA	XP_713561.1|1.1e-127|hypothetical protein CAALFM_C104930CA [Candida albicans SC5314]	GO:0016020//membrane;GO:0031224//intrinsic component of membrane;GO:0016021//integral component of membrane;GO:0110165//cellular anatomical entity;
3645345	3645345	XM_707933.2	Known_gene	1	2548322	2549842	NC_032089.1	-	1521	1521	37.97	29.24	48.14	52.1	88.46	85.83	38.45	75.463	-0.927713	0.050583	0.00701442	-0.456423	2.14549e-10	1.20603e-10	-0.877789	1.08574e-47	2.96458e-48	-1.55354	1.17798e-114	1.48658e-115	K00641//homoserine O-acetyltransferase/O-succinyltransferase [EC:2.3.1.31 2.3.1.46]+ko00920//Sulfur metabolism+ko01100//Metabolic pathways+ko01130//Biosynthesis of antibiotics+ko01110//Biosynthesis of secondary metabolites+ko00270//Cysteine and methionine metabolism	XP_713026.2|9.9e-296|hypothetical protein CAALFM_C111610CA [Candida albicans SC5314]	GO:0044237//cellular metabolic process;GO:0009086//methionine biosynthetic process;GO:0006555//methionine metabolic process;GO:0000097//sulfur amino acid biosynthetic process;GO:0006807//nitrogen compound metabolic process;GO:0043436//oxoacid metabolic process;GO:0006520//cellular amino acid metabolic process;GO:0009067//aspartate family amino acid biosynthetic process;GO:1901605//alpha-amino aci…
3642483	YPT53	XM_710772.1	Known_gene	1	1123169	1123828	NC_032089.1	+	660	660	116.54	98.32	272.38	97.36	529.86	373.26	162.413	333.493	-0.932999	0.226946	0.0703091	0.259424	0.000776669	0.000558312	-0.95999	2.16279e-119	3.0123e-120	-1.92462	3.86752e-247	2.92452e-248	K07976//Rab family, other;K07889//Ras-related protein Rab-5C+ko04144//Endocytosis+ko04145//Phagosome	XP_715865.1|2.4e-121|Rab family GTPase [Candida albicans SC5314]	GO:0009987//cellular process;GO:0051234//establishment of localization;GO:0007154//cell communication;GO:0023052//signaling;GO:0042886//amide transport;GO:0007165//signal transduction;GO:0050794//regulation of cellular process;GO:0006886//intracellular protein transport;GO:0015031//protein transport;GO:0051179//localization;GO:0006810//transport;GO:0051641//cellular localization;GO:0008104//prote…
3646624	3646624	BGI_novel_T000279,XM_019475548.1	Known_gene	2	1439829	1440730	NC_032096.1	-	902	831	67.22	53.09	122.67	77.21	51.72	40.92	80.993	56.616	0.44574	0.494305	0.255916	-0.199897	0.0140009	0.0109367	1.24599	1.63029e-60	3.80892e-61	0.375634	0.000255116	0.000162175	K15435//2',3'-cyclic-nucleotide 3'-phosphodiesterase [EC:3.1.4.37];K15435//2',3'-cyclic-nucleotide 3'-phosphodiesterase [EC:3.1.4.37]	XP_019331093.1|1.6e-137|2',3'-cyclic-nucleotide 3'-phosphodiesterase [Candida albicans SC5314]	GO:1901360//organic cyclic compound metabolic process;GO:0019637//organophosphate metabolic process;GO:0006807//nitrogen compound metabolic process;GO:0009187//cyclic nucleotide metabolic process;GO:0034641//cellular nitrogen compound metabolic process;GO:0044281//small molecule metabolic process;GO:0055086//nucleobase-containing small molecule metabolic process;GO:0006725//cellular aromatic comp…
3635147	MAK21	XM_718032.1	Known_gene	1	962464	965664	NC_032091.1	+	3201	3201	39.69	119.28	35.45	211.72	174.13	153.26	64.806	179.703	-1.26881	0.0516486	0.00726826	-2.41531	0	0	-2.29631	0	0	-0.361629	1.85333e-37	4.77736e-38	K19898//alpha-agglutinin	THV90109.1|1.9e-22|hypothetical protein D6D26_09532, partial [Aureobasidium pullulans]	GO:0043226//organelle;GO:0043228//non-membrane-bounded organelle;GO:0005634//nucleus;GO:0005730//nucleolus;GO:0043232//intracellular non-membrane-bounded organelle;GO:0070013//intracellular organelle lumen;GO:0005622//intracellular;GO:0043231//intracellular membrane-bounded organelle;GO:0031981//nuclear lumen;GO:0043233//organelle lumen;GO:0031974//membrane-enclosed lumen;GO:0043227//membrane-bou…
3635616	3635616	XM_717612.2	Known_gene	1	314498	315304	NC_032092.1	+	807	807	51.85	40.76	91.63	142.38	94.21	78.95	61.413	105.18	-0.744647	0.183212	0.0503857	-1.45733	1.06293e-86	2.30848e-87	-0.0400602	0.715091	0.692282	-0.953785	1.21244e-23	3.99528e-24	K16066//3-hydroxy acid dehydrogenase / malonic semialdehyde reductase [EC:1.1.1.381 1.1.1.-]+ko01100//Metabolic pathways+ko00260//Glycine, serine and threonine metabolism+ko00240//Pyrimidine metabolism	XP_722705.1|5.9e-146|oxidoreductase [Candida albicans SC5314]	GO:0003824//catalytic activity;GO:0016616//oxidoreductase activity, acting on the CH-OH group of donors, NAD or NADP as acceptor;GO:0016491//oxidoreductase activity;GO:0016614//oxidoreductase activity, acting on CH-OH group of donors;
3638803	3638803	XM_714459.2	Known_gene	1	34967	35674	NC_032090.1	-	708	708	156.63	109.32	84.3	101.43	62.99	85.53	116.75	83.316	0.498572	0.416887	0.19328	0.626876	4.21322e-21	1.8618e-21	0.42041	1.34115e-06	8.68116e-07	0.354055	2.18277e-07	1.1752e-07	NA	XP_719552.2|5.3e-135|hypothetical protein CAALFM_C200270CA [Candida albicans SC5314]	GO:0016021//integral component of membrane;GO:0016020//membrane;GO:0110165//cellular anatomical entity;GO:0031224//intrinsic component of membrane;
3646058	3646058	XM_707251.2	Known_gene	1	1592134	1594029	NC_032096.1	+	1896	1896	10.85	11.37	49.74	20.72	15.74	21.07	23.986	19.176	0.217181	0.827693	0.657803	-0.933329	1.44244e-17	6.82816e-18	1.65997	9.70466e-95	1.62717e-95	-0.889958	7.48257e-16	3.00384e-16	NA	XP_712344.2|0.0e+00|hypothetical protein CAALFM_CR07310WA [Candida albicans SC5314]	NA
30515158	30515158	XM_019475267.1	Known_gene	1	1898815	1899127	NC_032090.1	+	313	240	15.42	8.43	18.85	2.13	10.3	10.13	14.233	7.52	0.728126	0.50076	0.261842	2.85588	0.000161706	0.000112588	0.87192	0.0626437	0.0531028	-0.26503	0.951852	0.944174	NA	XP_019330812.1|2.1e-35|hypothetical protein CAALFM_C209290WA [Candida albicans SC5314]	GO:0022607//cellular component assembly;GO:0070070//proton-transporting V-type ATPase complex assembly;GO:0043933//protein-containing complex subunit organization;GO:0044085//cellular component biogenesis;GO:0065003//protein-containing complex assembly;GO:0016043//cellular component organization;GO:0070072//vacuolar proton-transporting V-type ATPase complex assembly;GO:0071840//cellular component…
3635606	3635606	BGI_novel_T000137,XM_717661.2	Known_gene	2	200547	208604	NC_032092.1	-	8058	7806	17.09	24.32	40	48.06	46.17	46.31	27.136	46.846	-0.773879	0.135885	0.0313981	-1.49168	0	0	-0.206956	9.61265e-11	5.39708e-11	-0.929181	2.12548e-113	2.70016e-114	K11771//SWI/SNF chromatin-remodeling complex subunit SWI1	XP_722754.1|0.0e+00|hypothetical protein CAALFM_C401020CA [Candida albicans SC5314]	GO:0007004//telomere maintenance via telomerase;GO:0034645//cellular macromolecule biosynthetic process;GO:1901576//organic substance biosynthetic process;GO:0071897//DNA biosynthetic process;GO:0071704//organic substance metabolic process;GO:0051052//regulation of DNA metabolic process;GO:0044238//primary metabolic process;GO:0009889//regulation of biosynthetic process;GO:0046483//heterocycle me…
3639367	3639367	XM_713923.2	Known_gene	1	85080	87248	NC_032089.1	-	2169	2169	75.51	119.26	67.33	86.32	134.94	149.16	87.366	123.473	-0.435499	0.495194	0.256715	-0.193027	1.25768e-05	8.36066e-06	-1.003	8.91662e-132	1.14808e-132	-0.32275	1.31845e-19	4.77664e-20	NA	XP_719016.2|0.0e+00|hypothetical protein CAALFM_C100540CA [Candida albicans SC5314]	GO:0044238//primary metabolic process;GO:0044260//cellular macromolecule metabolic process;GO:0070647//protein modification by small protein conjugation or removal;GO:0044237//cellular metabolic process;GO:0008152//metabolic process;GO:0006807//nitrogen compound metabolic process;GO:0044267//cellular protein metabolic process;GO:0036211//protein modification process;GO:0000209//protein polyubiqui…
3639532	3639532	XM_713697.1	Known_gene	1	1504795	1506954	NC_032089.1	-	2160	2160	NA	NA	NA	NA	NA	NA	NA	NA	NA	NA	NA	NA	NA	NA	NA	NA	NA	NA	NA	NA	K19783//DNA polymerase alpha-associated DNA helicase A [EC:3.6.4.12]	XP_718790.1|0.0e+00|ATP-dependent 5'-3' DNA helicase [Candida albicans SC5314]	GO:0000166//nucleotide binding;GO:0005524//ATP binding;GO:0017076//purine nucleotide binding;GO:1901363//heterocyclic compound binding;GO:0035639//purine ribonucleoside triphosphate binding;GO:0036094//small molecule binding;GO:0003824//catalytic activity;GO:0016817//hydrolase activity, acting on acid anhydrides;GO:0003676//nucleic acid binding;GO:0016818//hydrolase activity, acting on acid anhyd…
3635853	SPR3	XM_717475.2	Known_gene	1	405503	406978	NC_032090.1	+	1476	1476	0	0.18	0	0	0.11	0.11	0.06	0.073	-0.0411641	0.976229	0.945044	NA	NA	NA	-3.45943	0.318074	0.291302	0.710493	0.621008	0.586884	K12773//sporulation-regulated protein 3+ko04113//Meiosis - yeast	XP_722568.2|3.5e-282|septin [Candida albicans SC5314]	GO:0051641//cellular localization;GO:0033036//macromolecule localization;GO:0008104//protein localization;GO:0051179//localization;GO:0022402//cell cycle process;GO:0007049//cell cycle;GO:0009987//cellular process;GO:0034613//cellular protein localization;GO:0000910//cytokinesis;GO:0051301//cell division;GO:0070727//cellular macromolecule localization;GO:0061640//cytoskeleton-dependent cytokinesi…
3638495	3638495	XM_714736.1	Known_gene	1	1734635	1735285	NC_032091.1	+	651	651	70.07	119.37	155.78	135.51	114.41	139.53	115.073	129.816	-0.163194	0.813945	0.638609	-0.951531	5.32402e-33	1.9185e-33	0.445297	3.85698e-11	2.1462e-11	-0.225135	0.0123112	0.00908598	K11682//SWR1-complex protein 3	XP_719829.1|3.2e-118|hypothetical protein CAALFM_C307600WA [Candida albicans SC5314]	NA
3642905	3642905	XM_710316.2	Known_gene	1	1562962	1566078	NC_032092.1	-	3117	3117	18.94	31.13	4.71	10.55	14.12	22.68	18.26	15.783	0.241847	0.825886	0.655127	0.844193	1.17399e-22	5.04824e-23	-1.58394	2.54485e-42	7.51384e-43	0.456885	2.52313e-13	1.08964e-13	K20361//intracellular protein transport protein USO1	XP_715409.2|0.0e+00|hypothetical protein CAALFM_C407080CA [Candida albicans SC5314]	GO:0043232//intracellular non-membrane-bounded organelle;GO:0043226//organelle;GO:0043228//non-membrane-bounded organelle;GO:0043229//intracellular organelle;GO:0110165//cellular anatomical entity;GO:0015630//microtubule cytoskeleton;GO:0005622//intracellular;GO:0005856//cytoskeleton;GO:0005815//microtubule organizing center;
3635743	STT3	XM_717434.1	Known_gene	1	299220	301475	NC_032090.1	-	2256	2256	12.87	10.34	38.62	26.84	30.09	17.68	20.61	24.87	-0.305572	0.713907	0.503524	-1.06037	1.44753e-32	5.26706e-33	0.360064	7.13692e-08	4.40396e-08	-0.773882	6.51844e-13	2.84244e-13	K07151//dolichyl-diphosphooligosaccharide---protein glycosyltransferase [EC:2.4.99.18]+ko04141//Protein processing in endoplasmic reticulum+ko01100//Metabolic pathways+ko00513//Various types of N-glycan biosynthesis+ko00510//N-Glycan biosynthesis	XP_722527.1|0.0e+00|dolichyl-diphosphooligosaccharide--protein glycosyltransferase subunit [Candida albicans SC5314]	GO:0009058//biosynthetic process;GO:1901564//organonitrogen compound metabolic process;GO:0008152//metabolic process;GO:0044237//cellular metabolic process;GO:0018193//peptidyl-amino acid modification;GO:0019538//protein metabolic process;GO:0009059//macromolecule biosynthetic process;GO:0044260//cellular macromolecule metabolic process;GO:0070085//glycosylation;GO:0006807//nitrogen compound meta…
3647075	3647075	XM_706240.2	Known_gene	1	119448	120974	NC_032094.1	+	1527	1527	15.21	14.7	32.38	32.55	24.32	21.73	20.763	26.2	-0.345122	0.599412	0.360825	-1.09764	1.39588e-27	5.5419e-28	0.41296	5.85374e-06	3.89858e-06	-0.563872	1.91135e-06	1.07628e-06	NA	XP_711332.2|1.6e-293|hypothetical protein CAALFM_C600690WA [Candida albicans SC5314]	NA
3641585	3641585	XM_711674.2	Known_gene	1	139506	141368	NC_032093.1	-	1863	1863	24.16	18.21	21.13	23.31	20.82	21.43	21.166	21.853	-0.0325525	0.962576	0.915465	0.0516715	0.582605	0.553338	0.0213227	0.803805	0.784878	-0.234901	0.0275101	0.0210706	NA	XP_716767.2|0.0e+00|hypothetical protein CAALFM_C500610CA [Candida albicans SC5314]	NA
3637779	PUT1	XM_715489.2	Known_gene	1	580917	582386	NC_032093.1	+	1470	1470	1308.9	1260.91	1280.63	842.83	1045.36	1028.8	1283.48	972.33	0.398588	0.374007	0.159204	0.635041	0	0	0.292854	1.59073e-94	2.67512e-95	0.293503	1.55234e-104	2.06074e-105	K00318//proline dehydrogenase [EC:1.5.-.-]+ko00330//Arginine and proline metabolism+ko01100//Metabolic pathways+ko01130//Biosynthesis of antibiotics+ko01110//Biosynthesis of secondary metabolites	XP_720582.1|2.4e-283|proline dehydrogenase [Candida albicans SC5314]	GO:1901360//organic cyclic compound metabolic process;GO:0043436//oxoacid metabolic process;GO:0046700//heterocycle catabolic process;GO:0009064//glutamine family amino acid metabolic process;GO:0010133//proline catabolic process to glutamate;GO:0009065//glutamine family amino acid catabolic process;GO:0006560//proline metabolic process;GO:0046483//heterocycle metabolic process;GO:1901361//organi…
3639295	HBR1	XM_713943.1	Known_gene	1	49997	50743	NC_032089.1	+	747	747	69.99	79.99	122.81	63.4	72.59	78.61	90.93	71.533	0.324898	0.540163	0.299531	0.142666	0.122973	0.105408	0.758585	1.69839e-24	6.84406e-25	0.0251068	0.460284	0.419368	K18532//adenylate kinase [EC:2.7.4.3]+ko00230//Purine metabolism+ko01100//Metabolic pathways+ko01130//Biosynthesis of antibiotics+ko03008//Ribosome biogenesis in eukaryotes+ko01110//Biosynthesis of secondary metabolites	RCK55926.1|4.3e-119|Adenylate kinase isoenzyme 6 HBR1 [Candida viswanathii]	GO:0034470//ncRNA processing;GO:0090304//nucleic acid metabolic process;GO:0016072//rRNA metabolic process;GO:0010467//gene expression;GO:0062197//cellular response to chemical stress;GO:0042221//response to chemical;GO:0034599//cellular response to oxidative stress;GO:0042274//ribosomal small subunit biogenesis;GO:0006979//response to oxidative stress;GO:0030490//maturation of SSU-rRNA;GO:000046…
3637790	CST20	XM_715458.1	Known_gene	1	517861	521547	NC_032093.1	-	3687	3687	57.93	60.14	36.14	44.53	46.74	52.96	51.403	48.076	0.123074	0.868254	0.727183	0.379533	9.0346e-20	4.09976e-20	-0.371061	6.87095e-15	3.4022e-15	0.183422	2.36396e-06	1.3367e-06	K04409//p21-activated kinase 1 [EC:2.7.11.1]+ko04011//MAPK signaling pathway - yeast+ko04392//Hippo signaling pathway - multiple species	XP_720551.1|0.0e+00|mitogen-activated protein kinase kinase kinase kinase [Candida albicans SC5314]	GO:0044237//cellular metabolic process;GO:0044182//filamentous growth of a population of unicellular organisms;GO:0030435//sporulation resulting in formation of a cellular spore;GO:0045927//positive regulation of growth;GO:0043936//asexual sporulation resulting in formation of a cellular spore;GO:0009653//anatomical structure morphogenesis;GO:0043934//sporulation;GO:0006796//phosphate-containing …
3646403	3646403	XM_706896.2	Known_gene	1	1105182	1109018	NC_032096.1	+	3837	3837	4.82	11.02	3.84	4.24	4.6	4.55	6.56	4.463	0.534838	0.47433	0.23752	0.184969	0.202339	0.178249	-0.260528	0.0827387	0.0708972	1.27619	1.2981e-31	3.65588e-32	K11294//nucleolin	XP_711989.2|0.0e+00|hypothetical protein CAALFM_CR05100WA [Candida albicans SC5314]	GO:0042981//regulation of apoptotic process;GO:0043086//negative regulation of catalytic activity;GO:0031324//negative regulation of cellular metabolic process;GO:0051346//negative regulation of hydrolase activity;GO:0006996//organelle organization;GO:0007051//spindle organization;GO:1902850//microtubule cytoskeleton organization involved in mitosis;GO:0022607//cellular component assembly;GO:0043…
3643280	RIM101	XM_709954.1	Known_gene	1	3158465	3160450	NC_032089.1	-	1986	1986	2812.85	2836.11	1407.6	774.67	1043.26	923.04	2352.19	913.656	1.30381	0.0107853	0.000865099	1.86038	0	0	0.432139	4.76642e-291	3.0407e-292	1.61945	0	0	K11215//transcription factor STE12+ko04011//MAPK signaling pathway - yeast;K21545//C2H2 transcription facotor;K12498//early growth response protein 4	XP_715047.1|0.0e+00|alkaline-responsive transcriptional regulator [Candida albicans SC5314]	GO:0048584//positive regulation of response to stimulus;GO:0001410//chlamydospore formation;GO:0050896//response to stimulus;GO:0031326//regulation of cellular biosynthetic process;GO:0031669//cellular response to nutrient levels;GO:0044416//induction by symbiont of host defense response;GO:0048878//chemical homeostasis;GO:0036176//response to neutral pH;GO:0048518//positive regulation of biologi…
3642248	3642248	XM_711018.1	Known_gene	1	1508187	1509278	NC_032091.1	+	1092	1092	119.65	111.13	111.74	54.4	105.34	112.54	114.173	90.76	0.327813	0.606007	0.368306	1.13714	2.46583e-71	5.96226e-72	0.0850924	0.109793	0.0951064	-0.0181895	0.908609	0.895936	NA	XP_716111.1|4.1e-203|hypothetical protein CAALFM_C306610WA [Candida albicans SC5314]	NA
3647134	3647134	XM_706154.2	Known_gene	1	113323	114414	NC_032094.1	-	1092	1092	13.08	12.25	35.18	15.78	30.93	26.85	20.17	24.52	-0.299511	0.711324	0.500781	-0.270735	0.0850355	0.0716508	0.185749	0.0652373	0.0553776	-1.13214	4.6119e-16	1.83515e-16	K03143//transcription initiation factor TFIIH subunit 3+ko03420//Nucleotide excision repair+ko03022//Basal transcription factors	XP_711246.2|9.2e-203|TFIIH/NER complex subunit [Candida albicans SC5314]	GO:0006796//phosphate-containing compound metabolic process;GO:0036211//protein modification process;GO:0006357//regulation of transcription by RNA polymerase II;GO:0043170//macromolecule metabolic process;GO:0019219//regulation of nucleobase-containing compound metabolic process;GO:0016310//phosphorylation;GO:0044237//cellular metabolic process;GO:0006950//response to stress;GO:2001141//regulati…
3642105	3642105	XM_711176.1	Known_gene	1	1850799	1851599	NC_032096.1	-	801	801	45.79	43.92	62.55	39.71	36.18	57.37	50.753	44.42	0.189234	0.756466	0.561694	0.20553	0.0610683	0.0507198	0.789817	4.3568e-15	2.14202e-15	-0.385418	0.000468736	0.000303958	NA	XP_716269.1|2.4e-144|hypothetical protein CAALFM_CR08580CA [Candida albicans SC5314]	NA
3645574	3645574	XM_707719.2	Known_gene	1	1168416	1169708	NC_032090.1	-	1293	1293	51.21	54.96	110.55	72.3	81.24	73	72.24	75.513	-0.0901623	0.905057	0.793864	-0.49757	1.18491e-13	6.1408e-14	0.444437	1.60295e-16	7.59446e-17	-0.409514	5.09168e-09	2.54798e-09	K20465//oxysterol-binding protein-related protein 9/10/11	XP_712812.2|2.2e-248|oxysterol-binding protein [Candida albicans SC5314]	GO:0043231//intracellular membrane-bounded organelle;GO:0016020//membrane;GO:0043227//membrane-bounded organelle;GO:0043229//intracellular organelle;GO:0110165//cellular anatomical entity;GO:0005622//intracellular;GO:0043226//organelle;GO:0005829//cytosol;GO:0005737//cytoplasm;GO:0005496//steroid binding;GO:0005488//binding;GO:0032934//sterol binding;GO:0005215//transporter activity;GO:0005319//l…
3643882	3643882	XM_709352.2	Known_gene	1	1776991	1778634	NC_032090.1	+	1644	1644	36.36	25.93	26.31	46.51	35.96	31.1	29.533	37.856	-0.319245	0.596612	0.357252	-0.355189	7.56184e-07	4.7787e-07	-0.450782	1.43461e-07	8.95314e-08	-0.262292	0.00556834	0.00397578	K07478//putative ATPase	XP_714445.2|0.0e+00|hypothetical protein CAALFM_C208740WA [Candida albicans SC5314]	GO:1901576//organic substance biosynthetic process;GO:0008152//metabolic process;GO:0006282//regulation of DNA repair;GO:0044260//cellular macromolecule metabolic process;GO:0071704//organic substance metabolic process;GO:0060255//regulation of macromolecule metabolic process;GO:0050789//regulation of biological process;GO:0019219//regulation of nucleobase-containing compound metabolic process;GO…
3640759	3640759	XM_712547.2	Known_gene	1	1806847	1807839	NC_032089.1	-	993	993	6.82	7	3.32	7.87	7.05	7.14	5.713	7.353	-0.279959	0.742473	0.542188	-0.206592	0.384829	0.352416	-1.08644	0.000182716	0.000131575	-0.0285692	0.995044	0.994542	NA	XP_717640.1|2.7e-193|hypothetical protein CAALFM_C108240CA [Candida albicans SC5314]	GO:0005622//intracellular;GO:0005737//cytoplasm;GO:0110165//cellular anatomical entity;GO:0003824//catalytic activity;GO:0016866//intramolecular transferase activity;GO:0016868//intramolecular transferase activity, phosphotransferases;GO:0016853//isomerase activity;
3647351	PTC6	XM_705952.2	Known_gene	1	1682501	1683802	NC_032096.1	-	1302	1302	43.09	34.95	48.69	64.03	64.06	53.67	42.243	60.586	-0.500036	0.264568	0.0893197	-0.571395	1.888e-15	9.34832e-16	-0.395798	5.20621e-08	3.20302e-08	-0.618823	6.6941e-14	2.84142e-14	K19708//protein phosphatase PTC6 [EC:3.1.3.16 3.1.3.43]+ko04139//Mitophagy - yeast	XP_711044.1|4.9e-251|type 2C protein phosphatase [Candida albicans SC5314]	GO:0071704//organic substance metabolic process;GO:0065007//biological regulation;GO:0048518//positive regulation of biological process;GO:0006793//phosphorus metabolic process;GO:0009893//positive regulation of metabolic process;GO:0051341//regulation of oxidoreductase activity;GO:0016311//dephosphorylation;GO:0019538//protein metabolic process;GO:0006796//phosphate-containing compound metabolic…
3636179	3636179	XM_717034.2	Known_gene	1	2800779	2801945	NC_032089.1	-	1167	1167	38.57	32.36	20.32	34.57	20.44	29.37	30.416	28.126	0.149698	0.857513	0.708051	0.157959	0.0918593	0.0776928	-0.00849479	0.983219	0.982398	0.139868	0.119437	0.0985442	K11238//cytokinesis protein+ko04011//MAPK signaling pathway - yeast;K11422//histone-lysine N-methyltransferase SETD1 [EC:2.1.1.43]+ko00310//Lysine degradation	XP_722127.2|4.5e-232|hypothetical protein CAALFM_C112860CA [Candida albicans SC5314]	NA
3647067	SUN41	XM_706223.2	Known_gene	1	158273	159529	NC_032094.1	+	1257	1257	186.42	247.18	276.96	321.02	404.94	388.8	236.853	371.586	-0.622947	0.143986	0.0348423	-0.784107	1.28801e-119	2.33576e-120	-0.548031	2.10455e-75	4.25268e-76	-0.653466	6.93171e-98	9.63288e-99	K01238//SUN family beta-glucosidase [EC:3.2.1.-]	XP_711315.2|2.0e-246|putative glucosidase [Candida albicans SC5314]	GO:0050896//response to stimulus;GO:0042710//biofilm formation;GO:0051703//intraspecies interaction between organisms;GO:0016043//cellular component organization;GO:0009987//cellular process;GO:0071554//cell wall organization or biogenesis;GO:0009056//catabolic process;GO:0008152//metabolic process;GO:1901575//organic substance catabolic process;GO:0044419//interspecies interaction between organi…
3640167	3640167	XM_713094.1	Known_gene	1	325668	326258	NC_032096.1	+	591	591	124.15	74.24	51.93	44.09	47.48	61.23	83.44	50.933	0.70717	0.265534	0.0900716	1.49356	1.66983e-53	4.73938e-54	0.129248	0.247721	0.223644	0.277958	0.0014586	0.000980406	K11562//kinetochore protein NNF1	XP_718187.1|2.5e-101|MIND complex subunit [Candida albicans SC5314]	GO:0009987//cellular process;GO:0007059//chromosome segregation;GO:0005622//intracellular;GO:0000777//condensed chromosome kinetochore;GO:0043226//organelle;GO:0031974//membrane-enclosed lumen;GO:0000793//condensed chromosome;GO:0031981//nuclear lumen;GO:0005694//chromosome;GO:0000778//condensed nuclear chromosome kinetochore;GO:0000776//kinetochore;GO:0043232//intracellular non-membrane-bounded …
3638017	3638017	XM_715210.1	Known_gene	1	221546	222589	NC_032095.1	+	1044	1044	3.17	3.52	9.13	2.42	1.78	3.06	5.273	2.42	0.94056	0.220751	0.0665795	0.389476	0.298323	0.26965	2.35874	2.43273e-15	1.19036e-15	0.202044	0.510861	0.470514	K17741//NADPH-dependent methylglyoxal reductase [EC:1.1.1.283]+ko04011//MAPK signaling pathway - yeast+ko00640//Propanoate metabolism+ko00620//Pyruvate metabolism	XP_720303.1|2.7e-191|hypothetical protein CAALFM_C701050WA [Candida albicans SC5314]	GO:0016614//oxidoreductase activity, acting on CH-OH group of donors;GO:0003824//catalytic activity;GO:0016616//oxidoreductase activity, acting on the CH-OH group of donors, NAD or NADP as acceptor;GO:0016491//oxidoreductase activity;
3639354	3639354	XM_713885.2	Known_gene	1	176325	178475	NC_032089.1	+	2151	2151	21.67	14.42	20.86	27.6	16.2	23.64	18.983	22.48	-0.223203	0.72559	0.518192	-0.348969	1.55054e-05	1.03595e-05	0.364745	9.8786e-05	7.02786e-05	-0.713159	4.93004e-14	2.08518e-14	K07870//mitochondrial Rho GTPase 1 [EC:3.6.5.-]	XP_718978.1|0.0e+00|ERMES complex Ca(2+)-binding regulatory GTPase [Candida albicans SC5314]	GO:1903338//regulation of cell wall organization or biogenesis;GO:1900428//regulation of filamentous growth of a population of unicellular organisms;GO:0071840//cellular component organization or biogenesis;GO:0051128//regulation of cellular component organization;GO:0007005//mitochondrion organization;GO:0007165//signal transduction;GO:0051716//cellular response to stimulus;GO:0060237//regulatio…
3640179	NMA111	XM_713018.2	Known_gene	1	199316	202249	NC_032089.1	-	2934	2934	115.62	137.9	82.26	157.67	128.28	134.92	111.926	140.29	-0.277524	0.65359	0.424189	-0.447517	8.99774e-55	2.52214e-55	-0.641033	1.25253e-80	2.38458e-81	0.0315182	0.187266	0.159323	K22686//pro-apoptotic serine protease NMA111 [EC:3.4.21.-]	XP_718111.2|0.0e+00|Nma111p [Candida albicans SC5314]	GO:0016787//hydrolase activity;GO:0070011//peptidase activity, acting on L-amino acid peptides;GO:0017171//serine hydrolase activity;GO:0003824//catalytic activity;GO:0016825//hydrolase activity, acting on acid phosphorus-nitrogen bonds;GO:0140096//catalytic activity, acting on a protein;GO:0004175//endopeptidase activity;GO:0008236//serine-type peptidase activity;GO:0004252//serine-type endopept…
3648118	3648118	XM_705187.2	Known_gene	1	1337607	1340003	NC_032089.1	+	2397	2397	31.17	42.04	33.99	22.87	37.68	45.03	35.733	35.193	0.035823	0.965943	0.921247	0.446702	7.68614e-10	4.38362e-10	-0.148689	0.0254276	0.0208542	-0.0991238	0.139732	0.116721	K01183//chitinase [EC:3.2.1.14]+ko00520//Amino sugar and nucleotide sugar metabolism+ko01100//Metabolic pathways	XP_710279.2|0.0e+00|hypothetical protein CAALFM_C106320WA [Candida albicans SC5314]	GO:0071705//nitrogen compound transport;GO:0033036//macromolecule localization;GO:0006996//organelle organization;GO:0007031//peroxisome organization;GO:0072662//protein localization to peroxisome;GO:0015031//protein transport;GO:0071840//cellular component organization or biogenesis;GO:0051649//establishment of localization in cell;GO:0071806//protein transmembrane transport;GO:0006810//transpor…
30515341	30515341	XM_019475466.1	Known_gene	1	658611	658802	NC_032094.1	+	192	192	315.69	745.4	940.78	374.44	436.51	314.96	667.29	375.303	0.881609	0.153463	0.0385254	-0.246226	0.0476021	0.0390414	1.10784	6.83913e-39	2.12552e-39	1.24285	5.29615e-61	1.02968e-61	K02135//F-type H+-transporting ATPase subunit epsilon+ko01100//Metabolic pathways+ko00190//Oxidative phosphorylation	XP_019331011.1|1.9e-26|hypothetical protein CAALFM_C603130WA [Candida albicans SC5314]	GO:0009165//nucleotide biosynthetic process;GO:1901360//organic cyclic compound metabolic process;GO:0034641//cellular nitrogen compound metabolic process;GO:0009117//nucleotide metabolic process;GO:0006793//phosphorus metabolic process;GO:0019438//aromatic compound biosynthetic process;GO:1901137//carbohydrate derivative biosynthetic process;GO:0051179//localization;GO:0072521//purine-containing…
3638389	3638389	XM_714899.1	Known_gene	1	638299	638709	NC_032091.1	+	411	411	17.36	14.9	7.4	9.95	6.38	9.32	13.22	8.55	0.615697	0.478498	0.242634	0.802999	0.00888854	0.0068465	0.213969	0.635618	0.611098	0.67691	0.0151553	0.0112945	NA	XP_719978.1|7.8e-70|hypothetical protein CAALFM_C302890CA [Candida albicans SC5314]	GO:0031224//intrinsic component of membrane;GO:0016021//integral component of membrane;GO:0016020//membrane;GO:0110165//cellular anatomical entity;
3638836	3638836	XM_714375.2	Known_gene	1	172317	172958	NC_032090.1	+	642	642	203.9	183.94	476.6	155.63	207.08	174.27	288.146	178.993	0.607848	0.297922	0.10916	0.389742	7.65753e-11	4.26088e-11	1.20259	1.21998e-159	1.35078e-160	0.077911	0.0408775	0.0319272	K10756//replication factor C subunit 3/5+ko03430//Mismatch repair+ko03420//Nucleotide excision repair+ko03030//DNA replication	XP_719468.2|3.7e-119|mitochondrial 54S ribosomal protein YmL47 [Candida albicans SC5314]	GO:0034641//cellular nitrogen compound metabolic process;GO:0043170//macromolecule metabolic process;GO:0006412//translation;GO:0044237//cellular metabolic process;GO:1901576//organic substance biosynthetic process;GO:1901564//organonitrogen compound metabolic process;GO:0008152//metabolic process;GO:1901566//organonitrogen compound biosynthetic process;GO:0009058//biosynthetic process;GO:0010467…
3635768	CHT4	XM_717467.1	Known_gene	1	388066	389232	NC_032090.1	-	1167	1167	2.42	3.26	11.1	3.48	4.28	3.17	5.593	3.643	0.468473	0.615933	0.379793	-0.52408	0.1262	0.108301	1.37488	1.30293e-10	7.35018e-11	0.0403891	0.851392	0.833366	K01183//chitinase [EC:3.2.1.14]+ko00520//Amino sugar and nucleotide sugar metabolism+ko01100//Metabolic pathways	XP_722560.1|1.8e-233|putative chitinase [Candida albicans SC5314]	GO:0009987//cellular process;GO:1901135//carbohydrate derivative metabolic process;GO:0048869//cellular developmental process;GO:1901565//organonitrogen compound catabolic process;GO:0030154//cell differentiation;GO:0008152//metabolic process;GO:0071704//organic substance metabolic process;GO:0009057//macromolecule catabolic process;GO:0048646//anatomical structure formation involved in morphogen…
3644122	3644122	XM_709113.2	Known_gene	1	180036	181850	NC_032093.1	+	1815	1815	16.41	20.55	20.48	53.7	46.37	51.49	19.146	50.52	-1.33836	0.000130206	3.79325e-06	-1.71035	9.34791e-104	1.82982e-104	-1.17898	2.15926e-49	5.76956e-50	-1.32515	2.80784e-66	5.11932e-67	K19953//TBC1 domain family member 6	XP_714206.2|0.0e+00|Rab GTPase-activating protein [Candida albicans SC5314]	GO:0046907//intracellular transport;GO:0009987//cellular process;GO:0051336//regulation of hydrolase activity;GO:0006810//transport;GO:0043547//positive regulation of GTPase activity;GO:0015833//peptide transport;GO:0051179//localization;GO:0071705//nitrogen compound transport;GO:0033036//macromolecule localization;GO:0044093//positive regulation of molecular function;GO:0042886//amide transport;…
3644030	3644030	XM_709208.2	Known_gene	1	178343	181033	NC_032094.1	-	2691	2691	40.01	41.69	26.46	54.17	49.47	46.02	36.053	49.886	-0.413508	0.468292	0.233192	-0.437133	1.86506e-17	8.8475e-18	-0.902741	6.20073e-52	1.59057e-52	-0.14256	0.0156062	0.011641	K22493//agglutinin-like protein;K11682//SWR1-complex protein 3;K01183//chitinase [EC:3.2.1.14]+ko00520//Amino sugar and nucleotide sugar metabolism+ko01100//Metabolic pathways	XP_714301.2|0.0e+00|hypothetical protein CAALFM_C600910CA [Candida albicans SC5314]	GO:0065007//biological regulation;GO:0009987//cellular process;GO:0019725//cellular homeostasis;GO:0065008//regulation of biological quality;GO:0045454//cell redox homeostasis;GO:0042592//homeostatic process;GO:0050789//regulation of biological process;GO:0050794//regulation of cellular process;GO:0015035//protein disulfide oxidoreductase activity;GO:0016667//oxidoreductase activity, acting on a …
30514976	30514976	XM_019475080.1	Known_gene	1	656446	657201	NC_032089.1	-	756	666	10.67	7.01	44.77	23.26	14.18	5.66	20.816	14.366	0.366444	0.734367	0.531763	-1.12429	1.1604e-08	6.87262e-09	1.65867	1.31466e-26	5.1111e-27	0.308612	0.282103	0.246882	K00668//fatty acid synthase subunit beta, fungi type [EC:2.3.1.86]+ko01100//Metabolic pathways+ko00061//Fatty acid biosynthesis+ko01212//Fatty acid metabolism	XP_019330625.1|4.3e-126|hypothetical protein CAALFM_C103150CA [Candida albicans SC5314]	GO:0110165//cellular anatomical entity;GO:0016020//membrane;GO:0031224//intrinsic component of membrane;GO:0016021//integral component of membrane;
30514959	30514959	XM_019475063.1	Known_gene	1	198951	199220	NC_032089.1	+	270	270	205.62	137.5	332.23	158.19	147.64	193.99	225.116	166.606	0.431324	0.452746	0.221666	0.378322	0.00141079	0.00103022	1.1701	2.81754e-30	1.02246e-30	-0.496551	0.00902998	0.00657788	NA	XP_019330608.1|5.9e-42|hypothetical protein CAALFM_C100980WA [Candida albicans SC5314]	GO:0043170//macromolecule metabolic process;GO:0008152//metabolic process;GO:0044271//cellular nitrogen compound biosynthetic process;GO:0043604//amide biosynthetic process;GO:0010467//gene expression;GO:0043043//peptide biosynthetic process;GO:1901576//organic substance biosynthetic process;GO:0034641//cellular nitrogen compound metabolic process;GO:0044249//cellular biosynthetic process;GO:0006…
3642312	3642312	XM_710932.1	Known_gene	1	1620414	1621292	NC_032090.1	+	879	879	3.79	2.72	11.62	2.57	2.29	2.3	6.043	2.386	1.07739	0.183054	0.0502811	0.560429	0.15054	0.1305	2.34319	7.90225e-16	3.81388e-16	0.241973	0.53853	0.498532	K17100//dihydroxyacetone synthase [EC:2.2.1.3]+ko00680//Methane metabolism+ko01200//Carbon metabolism;K03142//transcription initiation factor TFIIH subunit 2+ko03420//Nucleotide excision repair+ko03022//Basal transcription factors;K01557//acylpyruvate hydrolase [EC:3.7.1.5]+ko01100//Metabolic pathways+ko00350//Tyrosine metabolism	XP_716025.1|8.6e-167|hypothetical protein CAALFM_C207980WA [Candida albicans SC5314]	GO:0018773//acetylpyruvate hydrolase activity;GO:0003824//catalytic activity;GO:0016823//hydrolase activity, acting on acid carbon-carbon bonds, in ketonic substances;GO:0016787//hydrolase activity;GO:0016822//hydrolase activity, acting on acid carbon-carbon bonds;
3636202	3636202	XM_717058.2	Known_gene	1	2866542	2868221	NC_032089.1	-	1680	1680	30.91	43.81	71.57	86.02	82.54	46.72	48.763	71.76	-0.547484	0.374007	0.159175	-1.4766	3.29699e-123	5.8299e-124	-0.205738	0.000158878	0.000114117	-0.0927801	0.283447	0.248344	K16261//yeast amino acid transporter	XP_722151.1|0.0e+00|hypothetical protein CAALFM_C113130CA [Candida albicans SC5314]	GO:0051234//establishment of localization;GO:0006811//ion transport;GO:0003333//amino acid transmembrane transport;GO:0055085//transmembrane transport;GO:0071702//organic substance transport;GO:0071705//nitrogen compound transport;GO:0006865//amino acid transport;GO:0009987//cellular process;GO:0006810//transport;GO:0006820//anion transport;GO:0051179//localization;GO:0034220//ion transmembrane t…
3639173	ASG7	XM_713992.1	Known_gene	1	519240	519686	NC_032094.1	-	447	447	9.7	7.11	1.06	0	1.71	0	5.956	0.57	1.77549	0.094496	0.0179019	9.92184	1.72651e-12	9.1934e-13	-0.689932	0.524632	0.496596	9.47371	6.9849e-10	3.38036e-10	NA	XP_719085.1|1.8e-80|Asg7p [Candida albicans SC5314]	GO:0016020//membrane;GO:0016021//integral component of membrane;GO:0110165//cellular anatomical entity;GO:0031224//intrinsic component of membrane;
3637727	ZCF22	XM_715467.2	Known_gene	1	535546	537645	NC_032093.1	+	2100	2100	30.76	33.46	46.89	15.59	10.71	26.63	37.036	17.643	0.995926	0.0616088	0.00933311	0.980435	1.43865e-30	5.41302e-31	2.13032	2.70637e-139	3.3355e-140	0.329385	4.71431e-06	2.70928e-06	K09247//heme activator protein 1;K21632//white-opaque regulator 2;K21547//C6 transcription factor Pro1	XP_720560.2|0.0e+00|Zcf22p [Candida albicans SC5314]	GO:0005622//intracellular;GO:0043231//intracellular membrane-bounded organelle;GO:0043226//organelle;GO:0043229//intracellular organelle;GO:0043227//membrane-bounded organelle;GO:0005634//nucleus;GO:0110165//cellular anatomical entity;GO:0046872//metal ion binding;GO:0008270//zinc ion binding;GO:0005488//binding;GO:0043169//cation binding;GO:0003700//DNA-binding transcription factor activity;GO:0…
3643295	DDI1	XM_709963.1	Known_gene	1	3169830	3170801	NC_032089.1	+	972	972	215.65	194.47	300.93	80.19	41.53	83.44	237.016	68.386	1.69071	6.63497e-05	1.71204e-06	1.4272	2.76426e-158	4.15194e-159	2.8572	0	0	1.22074	1.7043e-118	2.0935e-119	K11885//DNA damage-inducible protein 1	XP_715056.1|4.2e-175|Ddi1p [Candida albicans SC5314]	GO:0008233//peptidase activity;GO:0004175//endopeptidase activity;GO:0070011//peptidase activity, acting on L-amino acid peptides;GO:0016787//hydrolase activity;GO:0003824//catalytic activity;GO:0140096//catalytic activity, acting on a protein;GO:0004190//aspartic-type endopeptidase activity;GO:0070001//aspartic-type peptidase activity;
3639245	3639245	XM_714022.2	Known_gene	1	573291	575498	NC_032094.1	-	2208	2208	145.98	110.85	117.95	75.75	86.69	87.32	124.926	83.253	0.575259	0.19783	0.0567438	0.946453	6.21994e-139	1.01444e-139	0.444238	5.21762e-30	1.89779e-30	0.344225	1.9923e-19	7.25478e-20	NA	XP_719115.2|0.0e+00|hypothetical protein CAALFM_C602790CA [Candida albicans SC5314]	GO:0065007//biological regulation;GO:0080090//regulation of primary metabolic process;GO:0006355//regulation of transcription, DNA-templated;GO:1903506//regulation of nucleic acid-templated transcription;GO:0051171//regulation of nitrogen compound metabolic process;GO:0051252//regulation of RNA metabolic process;GO:0009889//regulation of biosynthetic process;GO:2001141//regulation of RNA biosynth…
3646424	3646424	XM_706875.2	Known_gene	1	839278	840204	NC_032089.1	+	927	927	113.6	113.72	80.36	49.45	46.27	75.35	102.56	57.023	0.835483	0.104456	0.0208495	1.19992	3.89785e-61	1.03516e-61	0.7964	1.34351e-22	5.6047e-23	0.593807	2.18338e-21	7.57268e-22	K07059//uncharacterized protein	XP_711968.2|1.4e-175|hypothetical protein CAALFM_C103990WA [Candida albicans SC5314]	GO:0046914//transition metal ion binding;GO:0043167//ion binding;GO:0046872//metal ion binding;GO:0005488//binding;GO:0008270//zinc ion binding;GO:0043169//cation binding;
3641170	3641170	XM_712097.1	Known_gene	1	1058295	1059131	NC_032092.1	-	837	837	49.81	51.02	49.06	45.19	45.89	80.12	49.963	57.066	-0.153233	0.830016	0.663457	0.140432	0.170298	0.148997	0.0963674	0.302213	0.27607	-0.6511	3.32347e-13	1.43918e-13	K09537//DnaJ homolog subfamily C member 17	XP_717190.1|3.0e-153|U2-type spliceosomal complex subunit [Candida albicans SC5314]	GO:1901363//heterocyclic compound binding;GO:0005488//binding;GO:0003676//nucleic acid binding;GO:0097159//organic cyclic compound binding;
3634912	PFK26	XM_718346.2	Known_gene	1	1948142	1951585	NC_032089.1	+	3444	3444	73.56	67.97	50.05	100.02	132.39	115.51	63.86	115.973	-0.792384	0.0985436	0.0190132	-0.443295	8.96003e-41	2.91816e-41	-1.40335	0	0	-0.765048	3.72274e-118	4.5854e-119	K00900//6-phosphofructo-2-kinase [EC:2.7.1.105]+ko00051//Fructose and mannose metabolism	XP_723439.2|0.0e+00|Pfk26p [Candida albicans SC5314]	GO:0006793//phosphorus metabolic process;GO:0006003//fructose 2,6-bisphosphate metabolic process;GO:0019318//hexose metabolic process;GO:0006000//fructose metabolic process;GO:0044281//small molecule metabolic process;GO:0008152//metabolic process;GO:0009987//cellular process;GO:0005975//carbohydrate metabolic process;GO:0019637//organophosphate metabolic process;GO:1901135//carbohydrate derivati…
3634941	IPT1	XM_718362.2	Known_gene	1	1991466	1993010	NC_032089.1	+	1545	1545	773.68	552.14	418.79	415.06	488.17	416.97	581.536	440.066	0.408919	0.49551	0.257117	0.898417	0	0	-0.221157	1.761e-21	7.50514e-22	0.405091	1.00854e-85	1.55916e-86	K22725//mannosylinositol phosphoceramide inositolphosphotransferase [EC:2.7.1.-]	XP_723455.2|4.3e-307|inositolphosphotransferase [Candida albicans SC5314]	GO:0006629//lipid metabolic process;GO:0090609//single-species submerged biofilm formation;GO:1901576//organic substance biosynthetic process;GO:0051641//cellular localization;GO:0098630//aggregation of unicellular organisms;GO:0071704//organic substance metabolic process;GO:0006643//membrane lipid metabolic process;GO:0036180//filamentous growth of a population of unicellular organisms in respon…
3646614	NMD3	XM_706687.2	Known_gene	1	1443567	1445129	NC_032096.1	+	1563	1563	145.91	204.45	163.74	261.87	224.92	223.82	171.366	236.87	-0.429838	0.377453	0.162345	-0.843772	8.41625e-141	1.35855e-141	-0.458005	2.7608e-39	8.5203e-40	-0.130591	0.000568064	0.000371232	K07562//nonsense-mediated mRNA decay protein 3+ko03013//RNA transport+ko03008//Ribosome biogenesis in eukaryotes	XP_002422186.1|6.4e-298|60S ribosomal export protein NMD3 [Candida dubliniensis CD36]	GO:0051234//establishment of localization;GO:0071705//nitrogen compound transport;GO:0071702//organic substance transport;GO:0045184//establishment of protein localization;GO:0042886//amide transport;GO:0015031//protein transport;GO:0006810//transport;GO:0033036//macromolecule localization;GO:0008104//protein localization;GO:0015833//peptide transport;GO:0051179//localization;GO:0110165//cellular…
3635789	3635789	XM_717454.2,BGI_novel_T000050	Known_gene	2	354235	355884	NC_032090.1	-	1650	1626	25.64	27.28	33.93	37.68	34.94	34.1	28.95	35.573	-0.294273	0.536908	0.296569	-0.555403	2.17695e-11	1.19492e-11	-0.0423182	0.591494	0.5667	-0.321928	0.000264289	0.000168095	K11360//transcriptional activator SPT8;K14823//rRNA-processing protein EBP2;K21646//glycolytic genes transcriptional activator GCR1;K06062//histone acetyltransferase [EC:2.3.1.48];K11360//transcriptional activator SPT8;K14572//midasin+ko03008//Ribosome biogenesis in eukaryotes;K19898//alpha-agglutinin	XP_722547.2|1.7e-295|hypothetical protein CAALFM_C201900CA [Candida albicans SC5314]	NA
3641230	3641230	XM_712075.2	Known_gene	1	2217265	2220897	NC_032090.1	-	3633	3633	18.91	28.31	39.58	17.08	15.57	32.85	28.933	21.833	0.366175	0.588214	0.348445	0.146841	0.0433556	0.0353698	1.346	1.86259e-109	2.8026e-110	-0.214582	0.000192984	0.000121803	NA	XP_717168.2|0.0e+00|tRNA methylation protein [Candida albicans SC5314]	GO:0043412//macromolecule modification;GO:0071704//organic substance metabolic process;GO:0010467//gene expression;GO:0034660//ncRNA metabolic process;GO:0006807//nitrogen compound metabolic process;GO:0009451//RNA modification;GO:0046483//heterocycle metabolic process;GO:0032259//methylation;GO:1901360//organic cyclic compound metabolic process;GO:0043170//macromolecule metabolic process;GO:0034…
3641926	3641926	XM_711345.1	Known_gene	1	1936663	1938141	NC_032096.1	-	1479	1479	11.14	13	16.47	15.34	10.15	12.74	13.536	12.743	0.0819287	0.912087	0.807319	-0.461549	0.000727475	0.000522218	0.698361	3.3559e-07	2.12238e-07	0.0291463	0.746331	0.719618	NA	XP_716438.1|3.9e-281|hypothetical protein CAALFM_CR09070CA [Candida albicans SC5314]	GO:0016021//integral component of membrane;GO:0016020//membrane;GO:0110165//cellular anatomical entity;GO:0031224//intrinsic component of membrane;
30515187	HRT1	XM_019475298.1	Known_gene	1	536423	536868	NC_032091.1	+	446	372	52.19	40.5	68.15	48.15	37.73	48.14	53.613	44.673	0.270874	0.661002	0.434327	0.116238	0.518112	0.486706	0.853002	1.72186e-07	1.07659e-07	-0.249314	0.439021	0.398446	K03868//RING-box protein 1 [EC:2.3.2.32]+ko04141//Protein processing in endoplasmic reticulum+ko03420//Nucleotide excision repair+ko04120//Ubiquitin mediated proteolysis+ko04111//Cell cycle - yeast	XP_019330843.1|1.7e-71|SCF ubiquitin ligase complex subunit [Candida albicans SC5314]	GO:0022402//cell cycle process;GO:0019941//modification-dependent protein catabolic process;GO:0000082//G1/S transition of mitotic cell cycle;GO:0008152//metabolic process;GO:0009987//cellular process;GO:0043161//proteasome-mediated ubiquitin-dependent protein catabolic process;GO:0019538//protein metabolic process;GO:0000278//mitotic cell cycle;GO:0071704//organic substance metabolic process;GO:…
3644934	IDP2	XM_708328.2	Known_gene	1	525541	526779	NC_032096.1	+	1239	1239	335.94	412.56	2165.51	156.38	238.9	134.56	971.336	176.613	2.01458	0.00261177	0.000148697	1.10315	2.64683e-217	3.25314e-218	3.18023	0	0	1.61635	0	0	K00031//isocitrate dehydrogenase [EC:1.1.1.42]+ko04146//Peroxisome+ko00020//Citrate cycle (TCA cycle)+ko01100//Metabolic pathways+ko01230//Biosynthesis of amino acids+ko01130//Biosynthesis of antibiotics+ko01110//Biosynthesis of secondary metabolites+ko01210//2-Oxocarboxylic acid metabolism+ko01200//Carbon metabolism+ko00480//Glutathione metabolism	XP_713421.2|2.2e-237|isocitrate dehydrogenase (NADP(+)) [Candida albicans SC5314]	GO:0008152//metabolic process;GO:0019752//carboxylic acid metabolic process;GO:0006099//tricarboxylic acid cycle;GO:0006082//organic acid metabolic process;GO:0006102//isocitrate metabolic process;GO:0009060//aerobic respiration;GO:0006091//generation of precursor metabolites and energy;GO:0006066//alcohol metabolic process;GO:0055114//oxidation-reduction process;GO:0006739//NADP metabolic proces…
3645010	3645010	XM_708263.2	Known_gene	1	74264	77572	NC_032092.1	-	3309	3309	90.53	89.62	45.79	81.01	89.03	81.93	75.313	83.99	-0.109791	0.89537	0.774189	0.160296	3.10707e-06	2.01866e-06	-0.959259	1.37126e-126	1.82514e-127	0.129429	8.09251e-05	4.97572e-05	K15505//DNA repair protein RAD5 [EC:3.6.4.-]	XP_713356.2|0.0e+00|translocase [Candida albicans SC5314]	GO:0110165//cellular anatomical entity;GO:0005622//intracellular;GO:0005737//cytoplasm;GO:0017076//purine nucleotide binding;GO:0032559//adenyl ribonucleotide binding;GO:0035639//purine ribonucleoside triphosphate binding;GO:0032555//purine ribonucleotide binding;GO:0036094//small molecule binding;GO:0043168//anion binding;GO:0043167//ion binding;GO:0000166//nucleotide binding;GO:1901363//heteroc…
3647448	3647448	XM_705867.1	Known_gene	1	858499	859104	NC_032093.1	-	606	606	141.78	156	181.09	213.91	196.88	244.6	159.623	218.463	-0.417466	0.339578	0.134486	-0.59335	1.79273e-21	7.87396e-22	-0.12061	0.0992022	0.085634	-0.648878	3.09422e-24	1.0061e-24	K14566//U3 small nucleolar RNA-associated protein 24+ko03008//Ribosome biogenesis in eukaryotes	XP_710959.1|1.0e-110|rRNA-processing protein [Candida albicans SC5314]	GO:0032991//protein-containing complex;GO:0005730//nucleolus;GO:0043231//intracellular membrane-bounded organelle;GO:0005634//nucleus;GO:0043228//non-membrane-bounded organelle;GO:0043227//membrane-bounded organelle;GO:0043226//organelle;GO:0032040//small-subunit processome;GO:0031981//nuclear lumen;GO:0031974//membrane-enclosed lumen;GO:1990904//ribonucleoprotein complex;GO:0043232//intracellula…
3643309	3643309	XM_709944.1	Known_gene	1	3145303	3146106	NC_032089.1	+	804	804	14.7	14.65	42.12	31.82	21.28	27.11	23.823	26.736	-0.189798	0.828714	0.660506	-1.11412	7.04754e-14	3.63706e-14	0.985007	8.49143e-15	4.2131e-15	-0.887924	5.40849e-08	2.8283e-08	K14263//kynurenine formamidase [EC:3.5.1.9]+ko00380//Tryptophan metabolism+ko01100//Metabolic pathways+ko00630//Glyoxylate and dicarboxylate metabolism	XP_715037.1|8.7e-150|arylformamidase [Candida albicans SC5314]	GO:0009987//cellular process;GO:1901361//organic cyclic compound catabolic process;GO:1901606//alpha-amino acid catabolic process;GO:0072524//pyridine-containing compound metabolic process;GO:1901293//nucleoside phosphate biosynthetic process;GO:0034641//cellular nitrogen compound metabolic process;GO:0019359//nicotinamide nucleotide biosynthetic process;GO:1901575//organic substance catabolic pr…
3645759	3645759	XM_707524.2	Known_gene	1	135543	138761	NC_032092.1	-	3219	3219	17.73	23.93	14.95	33.68	21.78	28.75	18.87	28.07	-0.510884	0.365929	0.153268	-0.9257	6.70813e-47	2.03086e-47	-0.542858	2.13487e-12	1.14516e-12	-0.264742	5.79979e-05	3.54946e-05	K21845//cargo-transport protein YPP1	XP_712617.2|0.0e+00|hypothetical protein CAALFM_C400780CA [Candida albicans SC5314]	NA
3645408	SWI4	XM_019475068.1	Known_gene	1	372225	375440	NC_032089.1	+	3216	3060	20.7	39.13	23.36	53.98	104.24	74.27	27.73	77.496	-1.35353	0.00976806	0.000751264	-1.38279	7.25161e-133	1.22277e-133	-2.1578	0	0	-0.924504	4.32642e-93	6.29588e-94	K06649//regulatory protein SWI4+ko04011//MAPK signaling pathway - yeast+ko04113//Meiosis - yeast+ko04111//Cell cycle - yeast	XP_019330613.1|0.0e+00|SBF complex DNA-binding subunit [Candida albicans SC5314]	GO:1902680//positive regulation of RNA biosynthetic process;GO:0051173//positive regulation of nitrogen compound metabolic process;GO:0010468//regulation of gene expression;GO:1903047//mitotic cell cycle process;GO:0009891//positive regulation of biosynthetic process;GO:0051252//regulation of RNA metabolic process;GO:0051254//positive regulation of RNA metabolic process;GO:0031325//positive regul…
3645318	3645318	XM_707920.2	Known_gene	1	2568686	2572051	NC_032089.1	+	3366	3366	28.24	20.53	11.85	22.37	17.99	14.88	20.206	18.413	0.160021	0.850858	0.699723	0.336175	7.78471e-08	4.74878e-08	-0.602308	6.55357e-13	3.44752e-13	0.464359	4.07469e-10	1.94936e-10	K07126//uncharacterized protein	XP_713013.2|0.0e+00|hypothetical protein CAALFM_C111730WA [Candida albicans SC5314]	NA
3636401	3636401	XM_716845.2	Known_gene	1	1157179	1158453	NC_032093.1	+	1275	1275	51.49	47.99	36.96	23.11	20.04	22.89	45.48	22.013	1.02303	0.0211785	0.00213855	1.15578	2.80774e-38	9.43122e-39	0.883082	4.45418e-18	2.02848e-18	1.06802	7.59977e-33	2.09182e-33	K02684//DNA primase small subunit [EC:2.7.7.102]+ko03030//DNA replication	XP_721938.2|5.6e-252|DNA primase subunit [Candida albicans SC5314]	GO:0006139//nucleobase-containing compound metabolic process;GO:0006259//DNA metabolic process;GO:1901362//organic cyclic compound biosynthetic process;GO:0018130//heterocycle biosynthetic process;GO:0044238//primary metabolic process;GO:0032774//RNA biosynthetic process;GO:0043170//macromolecule metabolic process;GO:0006260//DNA replication;GO:0046483//heterocycle metabolic process;GO:0034654//n…
30515330	30515330	XM_019475450.1	Known_gene	1	237854	238266	NC_032094.1	+	413	348	46.8	63.08	126.05	71.16	68	69.03	78.643	69.396	0.170008	0.830568	0.665243	-0.604558	0.000260358	0.000182974	0.890389	2.18005e-12	1.16976e-12	-0.130041	0.933599	0.924186	NA	XP_019330995.1|5.2e-59|hypothetical protein CAALFM_C601210WA [Candida albicans SC5314]	NA
3639239	HPD1	XM_714034.2	Known_gene	1	597534	598598	NC_032094.1	-	1065	1065	20.89	16.21	46.18	106.55	36.68	70.2	27.76	71.143	-1.25019	0.044974	0.00591467	-2.35065	4.88503e-171	6.97744e-172	0.332275	0.000281795	0.000205134	-2.11459	6.22776e-96	8.88484e-97	K00020//3-hydroxyisobutyrate dehydrogenase [EC:1.1.1.31]+ko00280//Valine, leucine and isoleucine degradation+ko01100//Metabolic pathways;K23146//3-hydroxypropionate dehydrogenase [EC:1.1.1.59]+ko00410//beta-Alanine metabolism+ko00640//Propanoate metabolism	XP_719127.2|6.9e-203|Hpd1p [Candida albicans SC5314]	GO:0006790//sulfur compound metabolic process;GO:0006082//organic acid metabolic process;GO:0033865//nucleoside bisphosphate metabolic process;GO:0043436//oxoacid metabolic process;GO:0006195//purine nucleotide catabolic process;GO:1901575//organic substance catabolic process;GO:0033869//nucleoside bisphosphate catabolic process;GO:1901135//carbohydrate derivative metabolic process;GO:0034654//nu…
3637973	3637973	XM_715306.1	Known_gene	1	19179	19871	NC_032095.1	+	693	693	71.82	68.13	217.68	80.9	66.06	51.05	119.21	66.003	0.727966	0.272723	0.0940704	-0.171754	0.0535379	0.0441786	1.72036	5.12858e-137	6.40644e-138	0.416379	3.77424e-06	2.15952e-06	K01783//ribulose-phosphate 3-epimerase [EC:5.1.3.1]+ko00030//Pentose phosphate pathway+ko01100//Metabolic pathways+ko01230//Biosynthesis of amino acids+ko00040//Pentose and glucuronate interconversions+ko01130//Biosynthesis of antibiotics+ko01110//Biosynthesis of secondary metabolites+ko01200//Carbon metabolism	XP_720399.1|3.0e-130|ribulose-phosphate 3-epimerase [Candida albicans SC5314]	GO:0051156//glucose 6-phosphate metabolic process;GO:0009052//pentose-phosphate shunt, non-oxidative branch;GO:0044281//small molecule metabolic process;GO:0055114//oxidation-reduction process;GO:1901135//carbohydrate derivative metabolic process;GO:0005996//monosaccharide metabolic process;GO:0006098//pentose-phosphate shunt;GO:0019321//pentose metabolic process;GO:0044282//small molecule catabo…
3645201	3645201	XM_708052.2	Known_gene	1	1517213	1518205	NC_032090.1	-	993	993	114.58	132.36	77.71	1485.7	344.7	712.95	108.216	847.783	-2.58549	4.10051e-06	6.67057e-08	-3.69672	0	0	-2.14917	0	0	-2.42933	0	0	K01240//uridine nucleosidase [EC:3.2.2.3]+ko00760//Nicotinate and nicotinamide metabolism+ko00240//Pyrimidine metabolism	XP_713145.2|3.1e-189|trifunctional uridine nucleosidase/nicotinamide riboside hydrolase/nicotinic acid riboside hydrolase [Candida albicans SC5314]	GO:0006152//purine nucleoside catabolic process;GO:0044270//cellular nitrogen compound catabolic process;GO:0044248//cellular catabolic process;GO:0034656//nucleobase-containing small molecule catabolic process;GO:0006725//cellular aromatic compound metabolic process;GO:0008152//metabolic process;GO:0044281//small molecule metabolic process;GO:0009164//nucleoside catabolic process;GO:1901575//org…
3634937	3634937	XM_019475135.1	Known_gene	1	1901480	1902264	NC_032089.1	+	785	723	44.44	35.13	59.15	70.68	64	58.5	46.24	64.393	-0.458328	0.350229	0.142202	-0.669443	1.16214e-11	6.32252e-12	-0.113694	0.316702	0.289834	-0.735733	2.96801e-10	1.41094e-10	NA	XP_019330680.1|6.0e-134|hypothetical protein CAALFM_C108710WA [Candida albicans SC5314]	NA
3635158	3635158	XM_718102.1	Known_gene	1	1097924	1098925	NC_032091.1	+	1002	1002	19.1	19.36	18.4	31.16	42.62	35.91	18.953	36.563	-0.884005	0.0497398	0.00682297	-0.706123	1.01283e-08	5.98506e-09	-1.21182	7.35836e-25	2.94064e-25	-0.891307	3.77628e-13	1.63907e-13	NA	XP_723195.1|4.5e-188|hypothetical protein CAALFM_C305110WA [Candida albicans SC5314]	GO:0040007//growth;GO:0030447//filamentous growth;GO:0031224//intrinsic component of membrane;GO:0110165//cellular anatomical entity;GO:0016020//membrane;GO:0016021//integral component of membrane;
3640154	HDA1	XM_713178.1	Known_gene	1	449417	451918	NC_032096.1	-	2502	2502	139.11	125.07	49.21	51.47	55.11	46.83	104.463	51.136	0.982838	0.110631	0.0231686	1.43442	2.85236e-292	2.80364e-293	-0.163363	0.00219745	0.00168002	1.41723	2.99629e-261	2.18516e-262	K11407//histone deacetylase 6 [EC:3.5.1.98]	XP_718271.1|0.0e+00|histone deacetylase [Candida albicans SC5314]	GO:0009405//pathogenesis;GO:0033554//cellular response to stress;GO:0050789//regulation of biological process;GO:1900445//positive regulation of filamentous growth of a population of unicellular organisms in response to biotic stimulus;GO:0009267//cellular response to starvation;GO:0060255//regulation of macromolecule metabolic process;GO:0006950//response to stress;GO:0009987//cellular process;G…
3640588	3640588	XM_712689.1	Known_gene	1	74962	76422	NC_032091.1	-	1461	1461	32.75	36.05	24.16	35.01	31.74	45.8	30.986	37.516	-0.225742	0.726865	0.520672	-0.0962722	0.272216	0.243818	-0.393682	4.97251e-05	3.48358e-05	-0.345348	2.83441e-05	1.70179e-05	K16794//platelet-activating factor acetylhydrolase IB subunit alpha+ko01100//Metabolic pathways+ko00565//Ether lipid metabolism	XP_717782.1|1.3e-284|hypothetical protein CAALFM_C300530CA [Candida albicans SC5314]	GO:0051648//vesicle localization;GO:0051647//nucleus localization;GO:0065009//regulation of molecular function;GO:0099518//vesicle cytoskeletal trafficking;GO:0051650//establishment of vesicle localization;GO:0051336//regulation of hydrolase activity;GO:0051649//establishment of localization in cell;GO:0022402//cell cycle process;GO:0071840//cellular component organization or biogenesis;GO:000998…
3639230	3639230	XM_714093.2	Known_gene	1	710076	711305	NC_032094.1	+	1230	1230	1038.47	976.46	2823.47	550.08	1114.37	719.1	1612.8	794.516	0.87772	0.162625	0.042179	0.916746	0	0	1.34124	0	0	0.441369	2.91127e-139	3.2679e-140	K11841//ubiquitin carboxyl-terminal hydrolase 10 [EC:3.4.19.12]+ko04139//Mitophagy - yeast	XP_719186.2|2.3e-234|hypothetical protein CAALFM_C603370WA [Candida albicans SC5314]	NA
3639031	MSS51	XM_714246.1	Known_gene	1	2144900	2146207	NC_032096.1	-	1308	1308	334.46	362.66	497.52	164.07	371.21	373.8	398.213	303.026	0.360703	0.582155	0.342296	1.02752	6.90272e-205	8.76132e-206	0.422519	3.65668e-64	8.23792e-65	-0.0436489	0.430957	0.390476	K17656//mitochondrial splicing suppressor protein 51	XP_719339.1|4.3e-263|Mss51p [Candida albicans SC5314]	GO:0065007//biological regulation;GO:0050789//regulation of biological process;GO:0019222//regulation of metabolic process;GO:0070131//positive regulation of mitochondrial translation;GO:0032270//positive regulation of cellular protein metabolic process;GO:0034248//regulation of cellular amide metabolic process;GO:0034250//positive regulation of cellular amide metabolic process;GO:0062125//regula…
3646949	3646949	XM_706350.2	Known_gene	1	1169089	1170171	NC_032092.1	-	1083	1083	7.36	7.01	22.99	2.86	4.51	6.53	12.453	4.633	1.20081	0.089726	0.0164007	1.36369	5.74957e-07	3.61996e-07	2.34981	4.01779e-38	1.2668e-38	0.102331	0.600414	0.563992	K17666//protein PET54, mitochondrial	XP_711442.2|5.9e-202|hypothetical protein CAALFM_C405360CA [Candida albicans SC5314]	NA
3638919	3638919	XM_714265.1	Known_gene	1	2179388	2180371	NC_032096.1	+	984	984	0.81	0	0.29	0.78	1.65	0.08	0.366	0.836	-0.585976	0.66246	0.436273	0.0544478	0.949667	0.940444	-2.50834	0.00154451	0.00117076	-3	0.595558	0.556828	NA	XP_719358.1|5.0e-192|hypothetical protein CAALFM_CR10200WA [Candida albicans SC5314]	GO:0005737//cytoplasm;GO:0005622//intracellular;GO:0110165//cellular anatomical entity;GO:0016853//isomerase activity;GO:0003824//catalytic activity;GO:0016868//intramolecular transferase activity, phosphotransferases;GO:0016866//intramolecular transferase activity;
3635164	3635164	XM_718083.1	Known_gene	1	1068899	1072126	NC_032091.1	-	3228	3228	16.73	19.05	18.22	39.94	42.52	59.46	18	47.306	-1.32102	0.000495802	1.79932e-05	-1.2554	4.74815e-90	1.00258e-90	-1.22262	9.83457e-88	1.76556e-88	-1.64213	1.65454e-193	1.47633e-194	K10597//ubiquitin conjugation factor E4 B [EC:2.3.2.27]+ko04141//Protein processing in endoplasmic reticulum+ko04120//Ubiquitin mediated proteolysis	XP_723176.1|0.0e+00|ubiquitin-ubiquitin ligase [Candida albicans SC5314]	GO:1901564//organonitrogen compound metabolic process;GO:0019538//protein metabolic process;GO:0010243//response to organonitrogen compound;GO:0043170//macromolecule metabolic process;GO:0051716//cellular response to stimulus;GO:0016567//protein ubiquitination;GO:0032446//protein modification by small protein conjugation;GO:0009056//catabolic process;GO:0033554//cellular response to stress;GO:190…
3648348	GLK1	XM_705084.2	Known_gene	1	1559026	1560444	NC_032096.1	+	1419	1419	21.49	14.24	38.12	58.57	29.56	18.08	24.616	35.403	-0.500398	0.52345	0.283334	-1.4465	2.89986e-68	7.17682e-69	0.366902	2.25132e-05	1.54863e-05	-0.344446	0.0115346	0.00847992	K00844//hexokinase [EC:2.7.1.1]+ko00010//Glycolysis / Gluconeogenesis+ko00520//Amino sugar and nucleotide sugar metabolism+ko01100//Metabolic pathways+ko01130//Biosynthesis of antibiotics+ko00052//Galactose metabolism+ko00051//Fructose and mannose metabolism+ko00500//Starch and sucrose metabolism+ko01110//Biosynthesis of secondary metabolites+ko01200//Carbon metabolism	XP_710176.2|8.1e-268|glucokinase [Candida albicans SC5314]	GO:0006796//phosphate-containing compound metabolic process;GO:0016310//phosphorylation;GO:0009150//purine ribonucleotide metabolic process;GO:0001678//cellular glucose homeostasis;GO:0055082//cellular chemical homeostasis;GO:0009259//ribonucleotide metabolic process;GO:0009185//ribonucleoside diphosphate metabolic process;GO:0019693//ribose phosphate metabolic process;GO:0055086//nucleobase-cont…
3647694	3647694	XM_705618.2,BGI_novel_T000264	Known_gene	2	544683	560259	NC_032096.1	+	15577	15152	212.47	125.3	168.61	184.23	138.69	140.01	168.793	154.31	0.153716	0.839046	0.680791	0.205751	1.54355e-51	4.45592e-52	0.281826	0	0	-0.160143	2.30131e-80	3.76268e-81	K11771//SWI/SNF chromatin-remodeling complex subunit SWI1;K15158//mediator of RNA polymerase II transcription subunit 15, fungi type;K10273//F-box and leucine-rich repeat protein 7	XP_710710.2|0.0e+00|hypothetical protein CAALFM_CR02510WA [Candida albicans SC5314]	GO:0042221//response to chemical;GO:0010468//regulation of gene expression;GO:0009987//cellular process;GO:0019222//regulation of metabolic process;GO:0050789//regulation of biological process;GO:0051716//cellular response to stimulus;GO:0042493//response to drug;GO:0050896//response to stimulus;GO:0070887//cellular response to chemical stimulus;GO:0060255//regulation of macromolecule metabolic p…
3644716	3644716	XM_708563.1	Known_gene	1	871931	872323	NC_032089.1	+	393	393	157.08	97.4	105.49	104.02	94.02	97.31	119.99	98.45	0.318429	0.597148	0.357999	0.594639	2.96613e-09	1.71948e-09	0.166067	0.098631	0.0851244	0.0013337	0.427218	0.386872	K11252//histone H2B	XP_713656.1|4.7e-64|hypothetical protein CAALFM_C104180WA [Candida albicans SC5314]	GO:0016043//cellular component organization;GO:0022607//cellular component assembly;GO:0071103//DNA conformation change;GO:0071824//protein-DNA complex subunit organization;GO:0034728//nucleosome organization;GO:0044085//cellular component biogenesis;GO:0006334//nucleosome assembly;GO:0006996//organelle organization;GO:0034622//cellular protein-containing complex assembly;GO:0071840//cellular com…
3644783	SAP7	XM_708473.2	Known_gene	1	1012991	1014757	NC_032089.1	+	1767	1767	0.74	1.06	0.15	0.4	0.54	0.3	0.65	0.413	0.492399	0.693595	0.477381	0.887525	0.16439	0.143415	-1.848	0.0430636	0.0359942	1.82103	0.00286369	0.00198403	K06005//candidapepsin [EC:3.4.23.24]	XP_713566.2|0.0e+00|Sap7p [Candida albicans SC5314]	GO:0009405//pathogenesis;GO:1901564//organonitrogen compound metabolic process;GO:0030163//protein catabolic process;GO:0071852//fungal-type cell wall organization or biogenesis;GO:0009987//cellular process;GO:0044419//interspecies interaction between organisms;GO:1901565//organonitrogen compound catabolic process;GO:1901575//organic substance catabolic process;GO:0009057//macromolecule catabolic…
3643896	PGA46	XM_709386.2	Known_gene	1	1700273	1701295	NC_032090.1	-	1023	1023	1.54	0.62	4.86	2.15	1.83	1.28	2.34	1.753	0.261444	0.837822	0.679379	-0.481406	0.309521	0.28029	1.40911	7.0627e-05	4.988e-05	-1.0458	0.136235	0.113526	K11294//nucleolin	XP_714479.2|1.4e-189|Pga46p [Candida albicans SC5314]	GO:0031225//anchored component of membrane;GO:0005576//extracellular region;GO:0016020//membrane;GO:0005886//plasma membrane;GO:0071944//cell periphery;GO:0110165//cellular anatomical entity;GO:0031224//intrinsic component of membrane;
3641245	3641245	XM_712049.1	Known_gene	1	2187377	2187721	NC_032090.1	+	345	345	672.31	219.25	332.12	242.6	173.09	201.77	407.893	205.82	0.948367	0.121461	0.0266701	1.47055	1.68122e-125	2.93904e-126	0.940182	1.30617e-32	4.53932e-33	0.119865	0.00629254	0.00450978	NA	XP_717142.1|2.5e-61|hypothetical protein CAALFM_C210600WA [Candida albicans SC5314]	NA
3641133	3641133	XM_712118.2	Known_gene	1	1015865	1017364	NC_032092.1	+	1500	1500	39.17	51.73	25.36	45.25	54.66	63.64	38.753	54.516	-0.416091	0.52367	0.283585	-0.208169	0.00596625	0.00454362	-1.10793	7.13834e-43	2.09334e-43	-0.298933	1.42805e-05	8.44208e-06	NA	XP_717211.2|1.3e-287|glucose-induced degradation complex subunit [Candida albicans SC5314]	NA
3646517	ALG1	XM_706765.1	Known_gene	1	1331712	1333082	NC_032092.1	+	1371	1371	43.42	46.64	26.65	34.68	36.22	44.73	38.903	38.543	0.0526281	0.947937	0.887147	0.324256	8.18696e-05	5.63162e-05	-0.442651	3.0085e-06	1.97251e-06	0.060325	0.319688	0.282406	K03842//beta-1,4-mannosyltransferase [EC:2.4.1.142]+ko01100//Metabolic pathways+ko00513//Various types of N-glycan biosynthesis+ko00510//N-Glycan biosynthesis	XP_711858.1|7.9e-268|chitobiosyldiphosphodolichol beta-1,4 mannosyltransferase [Candida albicans SC5314]	GO:1901137//carbohydrate derivative biosynthetic process;GO:0043170//macromolecule metabolic process;GO:0009987//cellular process;GO:0009101//glycoprotein biosynthetic process;GO:0071704//organic substance metabolic process;GO:0044238//primary metabolic process;GO:0006486//protein glycosylation;GO:0006807//nitrogen compound metabolic process;GO:0043413//macromolecule glycosylation;GO:0009058//bio…
3640163	3640163	XM_713154.2	Known_gene	1	409235	410230	NC_032096.1	-	996	996	2.38	1.72	5.11	1.28	1.97	0.5	3.07	1.25	0.988877	0.292121	0.105333	0.894818	0.0616983	0.0512534	1.37513	8.45348e-05	5.99e-05	1.78241	0.00560016	0.00400038	K17741//NADPH-dependent methylglyoxal reductase [EC:1.1.1.283]+ko04011//MAPK signaling pathway - yeast+ko00640//Propanoate metabolism+ko00620//Pyruvate metabolism	XP_718247.2|4.0e-189|hypothetical protein CAALFM_CR01810CA [Candida albicans SC5314]	GO:0003824//catalytic activity;GO:0016616//oxidoreductase activity, acting on the CH-OH group of donors, NAD or NADP as acceptor;GO:0016614//oxidoreductase activity, acting on CH-OH group of donors;GO:0016491//oxidoreductase activity;
3642475	3642475	XM_710780.2	Known_gene	1	1109135	1110883	NC_032089.1	+	1749	1749	29.67	26.54	26.04	23.43	26.02	26.87	27.416	25.44	0.119141	0.84719	0.692617	0.340648	9.46076e-05	6.52526e-05	0.00110849	0.950055	0.946406	-0.017828	0.981101	0.977804	K22193//golgi pH regulator	XP_715873.2|0.0e+00|hypothetical protein CAALFM_C105280WA [Candida albicans SC5314]	GO:0031224//intrinsic component of membrane;GO:0016021//integral component of membrane;GO:0110165//cellular anatomical entity;GO:0016020//membrane;
3640267	PBP2	XM_713013.2	Known_gene	1	853685	855274	NC_032094.1	-	1590	1590	103.65	118.72	122.87	260.09	282.47	245.02	115.08	262.526	-1.14268	0.000908238	3.71943e-05	-1.32729	2.38218e-296	2.3016e-297	-1.20096	1.59623e-261	1.1116e-262	-1.04534	1.99472e-183	1.8402e-184	K18738//heterogeneous nuclear rnp K-like protein	XP_718106.1|1.7e-306|Pbp2p [Candida albicans SC5314]	GO:0005488//binding;GO:0003676//nucleic acid binding;GO:0097159//organic cyclic compound binding;GO:0003723//RNA binding;GO:1901363//heterocyclic compound binding;
3635851	3635851	XM_717473.2	Known_gene	1	398041	401169	NC_032090.1	-	3129	3129	1.66	1.08	3.56	1.99	2.14	1.49	2.1	1.873	0.0996709	0.925298	0.833041	-0.261585	0.297985	0.269294	0.734266	0.000247966	0.000180136	-0.464281	0.134958	0.112416	NA	XP_722566.2|0.0e+00|hypothetical protein CAALFM_C202050CA [Candida albicans SC5314]	NA
3642095	SSB1	XM_711115.2	Known_gene	1	1762392	1764233	NC_032096.1	+	1842	1842	198.62	338.36	1464.54	892.18	808.59	525.26	667.173	742.01	-0.212949	0.843455	0.686615	-2.16732	0	0	0.856967	0	0	-0.634473	8.96189e-194	7.98152e-195	K03283//heat shock 70kDa protein 1/2/6/8+ko03040//Spliceosome+ko04144//Endocytosis+ko04141//Protein processing in endoplasmic reticulum+ko04213//Longevity regulating pathway - multiple species	EMG48146.1|0.0e+00|Heat shock protein SSB1 [Candida maltosa Xu316]	GO:0045184//establishment of protein localization;GO:0071840//cellular component organization or biogenesis;GO:0007154//cell communication;GO:0044237//cellular metabolic process;GO:0051656//establishment of organelle localization;GO:0050658//RNA transport;GO:1901360//organic cyclic compound metabolic process;GO:0044249//cellular biosynthetic process;GO:0006414//translational elongation;GO:0050896…
3643490	PRE2	XM_709731.1	Known_gene	1	1396740	1397597	NC_032090.1	-	858	858	7.16	0	29.7	0	0	2.65	12.286	0.883	0.393748	0.676899	0.453895	9.48382	4.79965e-21	2.12416e-21	11.5362	2.56531e-85	4.69536e-86	-8.04985	1.19833e-07	6.37322e-08	K02737//20S proteasome subunit beta 5 [EC:3.4.25.1]+ko03050//Proteasome	XP_714824.1|6.6e-164|proteasome core particle subunit beta 5 [Candida albicans SC5314]	GO:0044237//cellular metabolic process;GO:0044267//cellular protein metabolic process;GO:0009987//cellular process;GO:0043161//proteasome-mediated ubiquitin-dependent protein catabolic process;GO:0044265//cellular macromolecule catabolic process;GO:0051603//proteolysis involved in cellular protein catabolic process;GO:0006511//ubiquitin-dependent protein catabolic process;GO:0044260//cellular mac…
3647834	3647834	XM_705469.2	Known_gene	1	892609	894141	NC_032094.1	+	1533	1533	265.62	135.58	371.5	777.97	727.23	491.53	257.566	665.576	-1.29846	0.0105526	0.000837951	-1.55035	0	0	-0.96905	0	0	-1.85814	0	0	K14997//solute carrier family 38 (sodium-coupled neutral amino acid transporter), member 11	XP_710561.2|1.5e-291|aspartate/glutamate transporter [Candida albicans SC5314]	GO:0034220//ion transmembrane transport;GO:0003333//amino acid transmembrane transport;GO:0051179//localization;GO:0098656//anion transmembrane transport;GO:0071702//organic substance transport;GO:1903825//organic acid transmembrane transport;GO:0006811//ion transport;GO:0006865//amino acid transport;GO:0006820//anion transport;GO:0051234//establishment of localization;GO:0046942//carboxylic acid…
3647150	3647150	XM_706170.2	Known_gene	1	92659	94050	NC_032094.1	+	1392	1392	296.33	210.56	108.81	119.97	221.97	151.27	205.233	164.403	0.330976	0.677439	0.454596	1.30453	9.82822e-285	9.77556e-286	-1.02855	2.11869e-138	2.62536e-139	0.477105	4.86527e-40	1.21652e-40	K13535//cardiolipin-specific phospholipase [EC:3.1.1.-]+ko00564//Glycerophospholipid metabolism	XP_711262.2|3.6e-276|carboxylic ester hydrolase [Candida albicans SC5314]	GO:0048878//chemical homeostasis;GO:0006644//phospholipid metabolic process;GO:0009987//cellular process;GO:0044237//cellular metabolic process;GO:0046471//phosphatidylglycerol metabolic process;GO:0006793//phosphorus metabolic process;GO:0006650//glycerophospholipid metabolic process;GO:0032048//cardiolipin metabolic process;GO:0019637//organophosphate metabolic process;GO:0071704//organic subst…
3646418	3646418	XM_706872.2	Known_gene	1	834229	836838	NC_032089.1	-	2610	2610	14.98	14.49	12.15	25.11	22.9	35.36	13.873	27.79	-0.925956	0.0432157	0.00562588	-0.745224	3.66183e-20	1.64758e-20	-0.914391	1.44853e-24	5.82992e-25	-1.28706	1.29636e-64	2.42454e-65	K06687//nucleolar protein involved in exit from mitosis+ko04111//Cell cycle - yeast;K09291//nucleoprotein TPR+ko03013//RNA transport	XP_711965.2|0.0e+00|hypothetical protein CAALFM_C103960CA [Candida albicans SC5314]	NA
3639339	LEU4	XM_713955.2	Known_gene	1	29804	31543	NC_032089.1	+	1740	1740	5.37	7.43	33.4	0.59	3.37	0.71	15.4	1.556	2.4906	0.00128419	5.90039e-05	3.18614	5.60444e-22	2.43716e-22	3.30903	3.8149e-132	4.87374e-133	3.38747	4.21335e-32	1.176e-32	K01649//2-isopropylmalate synthase [EC:2.3.3.13]+ko01100//Metabolic pathways+ko01230//Biosynthesis of amino acids+ko00290//Valine, leucine and isoleucine biosynthesis+ko01110//Biosynthesis of secondary metabolites+ko01210//2-Oxocarboxylic acid metabolism+ko00620//Pyruvate metabolism	XP_719048.1|0.0e+00|2-isopropylmalate synthase [Candida albicans SC5314]	GO:0044281//small molecule metabolic process;GO:0006520//cellular amino acid metabolic process;GO:0019752//carboxylic acid metabolic process;GO:0009058//biosynthetic process;GO:0042221//response to chemical;GO:1901564//organonitrogen compound metabolic process;GO:0070887//cellular response to chemical stimulus;GO:0035690//cellular response to drug;GO:0042493//response to drug;GO:1901566//organoni…
3644072	SPO72	XM_709196.2	Known_gene	1	1225302	1230872	NC_032090.1	+	5571	5571	49.84	47.9	26.63	96.9	73.56	73.98	41.456	81.48	-0.874739	0.104284	0.0206067	-0.959193	2.90779e-246	3.25252e-247	-1.46587	0	0	-0.62711	1.95364e-88	2.94802e-89	K17906//autophagy-related protein 2+ko04136//Autophagy - other+ko04138//Autophagy - yeast	XP_714289.2|0.0e+00|Spo72p [Candida albicans SC5314]	GO:0042886//amide transport;GO:1905037//autophagosome organization;GO:0016043//cellular component organization;GO:0070925//organelle assembly;GO:0044085//cellular component biogenesis;GO:0044248//cellular catabolic process;GO:0007005//mitochondrion organization;GO:0044804//autophagy of nucleus;GO:0044237//cellular metabolic process;GO:0022607//cellular component assembly;GO:0030242//autophagy of …
3642908	3642908	XM_710319.2	Known_gene	1	1557803	1562149	NC_032092.1	+	4347	4347	48.33	70.41	26.11	91.68	48.99	74.09	48.283	71.586	-0.470302	0.520031	0.279655	-0.923688	7.9177e-170	1.13621e-170	-0.907885	5.40957e-85	9.93742e-86	-0.0734985	0.0439139	0.0344316	K03018//DNA-directed RNA polymerase III subunit RPC1 [EC:2.7.7.6]+ko03020//RNA polymerase	XP_715412.1|0.0e+00|DNA-directed RNA polymerase III core subunit [Candida albicans SC5314]	GO:0006351//transcription, DNA-templated;GO:0046483//heterocycle metabolic process;GO:0090304//nucleic acid metabolic process;GO:0006807//nitrogen compound metabolic process;GO:0044238//primary metabolic process;GO:0097659//nucleic acid-templated transcription;GO:0043170//macromolecule metabolic process;GO:0008152//metabolic process;GO:0034641//cellular nitrogen compound metabolic process;GO:0006…
3637037	3637037	XM_716309.1	Known_gene	1	344244	345575	NC_032095.1	-	1332	1332	30.61	34.08	77.76	29.16	37.35	51.36	47.483	39.29	0.219779	0.772473	0.581674	0.0700123	0.487057	0.452966	1.05792	4.77083e-51	1.24848e-51	-0.59172	1.05017e-12	4.6094e-13	NA	XP_721402.1|3.9e-256|hypothetical protein CAALFM_C701590CA [Candida albicans SC5314]	NA
3647912	MPP10	XM_705388.2	Known_gene	1	9360	11063	NC_032090.1	-	1704	1704	246.59	341.24	76.87	195.37	159.87	235.24	221.566	196.826	0.213708	0.828201	0.6593	0.335905	1.04031e-28	4.05184e-29	-1.05641	1.20398e-130	1.56027e-131	0.536653	3.45878e-96	4.8996e-97	K14559//U3 small nucleolar RNA-associated protein MPP10+ko03008//Ribosome biogenesis in eukaryotes	KGR15876.1|0.0e+00|U3 small nucleolar RNA-associated protein MPP10 [Candida albicans P78048]	NA
3638406	SLD1	XM_714865.2	Known_gene	1	578561	580315	NC_032091.1	-	1755	1755	32.31	34.19	90.23	52.86	83.74	132.69	52.243	89.763	-0.74481	0.270378	0.0927666	-0.710196	3.78477e-25	1.55459e-25	0.10769	0.022668	0.0184963	-1.95641	1.10198e-285	7.51816e-287	K13076//sphingolipid 8-(E)-desaturase [EC:1.14.19.18]	XP_719958.2|0.0e+00|Sld1p [Candida albicans SC5314]	GO:0043603//cellular amide metabolic process;GO:0044237//cellular metabolic process;GO:0016043//cellular component organization;GO:0046467//membrane lipid biosynthetic process;GO:0008152//metabolic process;GO:0044249//cellular biosynthetic process;GO:0071840//cellular component organization or biogenesis;GO:0044419//interspecies interaction between organisms;GO:0006629//lipid metabolic process;GO…
3637902	3637902	XM_715377.2	Known_gene	1	580679	582313	NC_032092.1	+	1635	1635	153.32	125.11	148.06	188.79	159.58	161.06	142.163	169.81	-0.238044	0.631301	0.400059	-0.300236	1.27873e-17	6.0489e-18	-0.108098	0.00730488	0.00574826	-0.364401	2.48394e-19	9.07426e-20	K09496//T-complex protein 1 subunit delta	XP_720470.1|1.4e-300|chaperonin-containing T-complex subunit [Candida albicans SC5314]	GO:0009987//cellular process;GO:0006457//protein folding;GO:0032991//protein-containing complex;GO:0005737//cytoplasm;GO:0005622//intracellular;GO:0101031//chaperone complex;GO:0005832//chaperonin-containing T-complex;GO:0005829//cytosol;GO:0110165//cellular anatomical entity;GO:0032553//ribonucleotide binding;GO:0035639//purine ribonucleoside triphosphate binding;GO:0032559//adenyl ribonucleotid…
3639545	3639545	XM_713744.1	Known_gene	1	1417195	1417896	NC_032089.1	-	702	702	2.02	0.27	1.3	1.56	1.97	1.89	1.196	1.806	-0.414769	0.743209	0.543766	0.372809	0.543041	0.511852	-0.599684	0.375381	0.347798	-2.80735	0.00399407	0.0028088	NA	XP_718837.1|4.1e-127|hypothetical protein CAALFM_C106620CA [Candida albicans SC5314]	NA
3644092	3644092	XM_709158.1	Known_gene	1	1884891	1885955	NC_032090.1	+	1065	1065	3.75	1.93	20.29	17.51	17.11	8.73	8.656	14.45	-0.683403	0.485627	0.24889	-2.22322	2.31021e-27	9.21454e-28	0.245929	0.0729463	0.0622626	-2.17738	2.05435e-13	8.85468e-14	NA	XP_714251.1|6.0e-199|hypothetical protein CAALFM_C209180WA [Candida albicans SC5314]	GO:0006139//nucleobase-containing compound metabolic process;GO:0019693//ribose phosphate metabolic process;GO:0034655//nucleobase-containing compound catabolic process;GO:0009987//cellular process;GO:0044270//cellular nitrogen compound catabolic process;GO:0016070//RNA metabolic process;GO:1901575//organic substance catabolic process;GO:0009057//macromolecule catabolic process;GO:0090304//nuclei…
3645459	3645459	XM_707848.1	Known_gene	1	916040	917584	NC_032090.1	-	1545	1545	28.15	38.75	43.92	42.55	35.34	31.93	36.94	36.606	0.00976679	0.988138	0.975281	-0.596024	1.43742e-13	7.4687e-14	0.313576	3.84338e-05	2.67458e-05	0.279284	0.000281435	0.000179237	K01930//folylpolyglutamate synthase [EC:6.3.2.17]+ko01100//Metabolic pathways+ko00790//Folate biosynthesis	XP_712941.1|3.0e-300|tetrahydrofolate synthase [Candida albicans SC5314]	GO:0016053//organic acid biosynthetic process;GO:1901564//organonitrogen compound metabolic process;GO:0006725//cellular aromatic compound metabolic process;GO:0044271//cellular nitrogen compound biosynthetic process;GO:1901576//organic substance biosynthetic process;GO:0006730//one-carbon metabolic process;GO:0043603//cellular amide metabolic process;GO:1901360//organic cyclic compound metabolic…
3636226	HYR1	XM_717090.2	Known_gene	1	2944587	2947346	NC_032089.1	+	2760	2760	2.44	3.77	3.36	2.41	1.67	1.05	3.19	1.71	0.81237	0.224932	0.069161	0.017848	0.952145	0.943536	1.00861	1.19546e-05	8.10752e-06	1.84418	6.01429e-14	2.54882e-14	K22493//agglutinin-like protein	XP_722183.2|0.0e+00|Hyr1p [Candida albicans SC5314]	GO:0009605//response to external stimulus;GO:0030682//mitigation of host defenses by symbiont;GO:0044406//adhesion of symbiont to host;GO:0052173//response to defenses of other organism;GO:0022610//biological adhesion;GO:0009607//response to biotic stimulus;GO:0044407//single-species biofilm formation in or on host organism;GO:0044403//symbiotic process;GO:0051701//interaction with host;GO:005170…
3643142	3643142	XM_710149.1	Known_gene	1	856037	856963	NC_032095.1	-	927	927	99.39	149.46	156.29	97.33	94.96	121.98	135.046	104.756	0.359723	0.488428	0.251166	0.0302161	0.669183	0.641282	0.718834	5.94386e-36	1.93166e-36	0.293115	3.76812e-09	1.87488e-09	NA	XP_715242.1|3.4e-174|hypothetical protein CAALFM_C703880CA [Candida albicans SC5314]	GO:0006796//phosphate-containing compound metabolic process;GO:0016310//phosphorylation;GO:0032502//developmental process;GO:0044114//development of symbiont in host;GO:0044115//development of symbiont involved in interaction with host;GO:0042775//mitochondrial ATP synthesis coupled electron transport;GO:0009987//cellular process;GO:0008152//metabolic process;GO:0055114//oxidation-reduction proce…
3646665	LHP1	XM_706645.2	Known_gene	1	1623838	1624812	NC_032089.1	-	975	975	44.15	71.99	122.15	87.42	77.58	114.1	79.43	93.033	-0.232632	0.742363	0.541541	-0.98555	8.17787e-37	2.79488e-37	0.654897	9.19554e-26	3.63184e-26	-0.66443	9.90035e-23	3.3223e-23	K11090//lupus La protein	XP_711737.2|1.6e-182|Lhp1p [Candida albicans SC5314]	GO:0044237//cellular metabolic process;GO:0006396//RNA processing;GO:0034641//cellular nitrogen compound metabolic process;GO:0010467//gene expression;GO:0090304//nucleic acid metabolic process;GO:0016070//RNA metabolic process;GO:0006807//nitrogen compound metabolic process;GO:0006139//nucleobase-containing compound metabolic process;GO:0008152//metabolic process;GO:0071704//organic substance me…
3635284	EGD2	XM_717981.1	Known_gene	1	865042	865578	NC_032091.1	-	537	537	24.92	30.87	148.51	71.27	84.99	38.11	68.1	64.79	-0.00981582	0.993072	0.985473	-1.51599	3.21482e-28	1.26181e-28	0.805195	7.97215e-22	3.36966e-22	-0.303964	0.126972	0.105444	K03626//nascent polypeptide-associated complex subunit alpha	XP_723074.1|7.2e-92|Egd2p [Candida albicans SC5314]	GO:0015833//peptide transport;GO:0051179//localization;GO:0015031//protein transport;GO:0071702//organic substance transport;GO:0008104//protein localization;GO:0033036//macromolecule localization;GO:0045184//establishment of protein localization;GO:0042886//amide transport;GO:0006810//transport;GO:0071705//nitrogen compound transport;GO:0051234//establishment of localization;GO:0032991//protein-…
3647153	FET3	XM_706173.2	Known_gene	1	80175	82049	NC_032094.1	-	1875	1875	1.08	2.32	4.13	1.33	0.9	0.45	2.51	0.893	1.19825	0.148009	0.0361461	-0.300395	0.452522	0.418954	2.19814	1.68059e-12	8.96144e-13	2.36613	2.96403e-08	1.53107e-08	K19791//iron transport multicopper oxidase	XP_711265.2|0.0e+00|ferroxidase [Candida albicans SC5314]	GO:0008152//metabolic process;GO:0065007//biological regulation;GO:0006631//fatty acid metabolic process;GO:0071496//cellular response to external stimulus;GO:0098660//inorganic ion transmembrane transport;GO:0031668//cellular response to extracellular stimulus;GO:0051649//establishment of localization in cell;GO:0051179//localization;GO:0048878//chemical homeostasis;GO:0031669//cellular response…
3637982	3637982	XM_715298.1	Known_gene	1	31779	33545	NC_032095.1	+	1767	1767	37.63	27.12	26.3	20.62	20.89	33.53	30.35	25.013	0.288761	0.65359	0.42423	0.867839	1.66851e-25	6.82826e-26	0.33225	0.000319743	0.000233346	-0.306095	0.000396779	0.000255496	K15015//solute carrier family 32 (vesicular inhibitory amino acid transporter)	XP_720391.1|0.0e+00|hypothetical protein CAALFM_C700230WA [Candida albicans SC5314]	GO:0006820//anion transport;GO:0071705//nitrogen compound transport;GO:0015849//organic acid transport;GO:0051234//establishment of localization;GO:0006865//amino acid transport;GO:0055085//transmembrane transport;GO:0071702//organic substance transport;GO:0046942//carboxylic acid transport;GO:0034220//ion transmembrane transport;GO:0006810//transport;GO:0003333//amino acid transmembrane transpor…
3645330	3645330	XM_707936.2	Known_gene	1	2541281	2541658	NC_032089.1	+	378	378	183.18	147.63	181.7	79.87	93.14	124.06	170.836	99.023	0.789763	0.0835513	0.0148687	1.19754	5.22814e-30	1.982e-30	0.964086	6.77092e-22	2.85514e-22	0.250948	0.000438576	0.000283884	K10253//DOPA 4,5-dioxygenase [EC:1.14.99.-]	XP_713029.1|9.3e-70|hypothetical protein CAALFM_C111580WA [Candida albicans SC5314]	GO:0003824//catalytic activity;GO:0016491//oxidoreductase activity;GO:0051213//dioxygenase activity;
3637738	3637738	XM_715508.2	Known_gene	1	613567	614718	NC_032093.1	-	1152	1152	118.93	117.09	76.08	66.94	59.18	80.67	104.033	68.93	0.598986	0.265534	0.0901321	0.829172	4.07454e-45	1.25948e-45	0.362408	1.14891e-07	7.14522e-08	0.537514	3.62364e-23	1.20443e-23	K03130//transcription initiation factor TFIID subunit 5+ko03022//Basal transcription factors;K14556//U3 small nucleolar RNA-associated protein 12+ko03008//Ribosome biogenesis in eukaryotes;K14299//nucleoporin SEH1+ko03013//RNA transport	XP_720601.2|2.2e-223|iron-sulfur cluster assembly protein [Candida albicans SC5314]	GO:0031163//metallo-sulfur cluster assembly;GO:0009987//cellular process;GO:0016226//iron-sulfur cluster assembly;GO:0008152//metabolic process;GO:0071840//cellular component organization or biogenesis;GO:0006790//sulfur compound metabolic process;GO:0044237//cellular metabolic process;GO:0022607//cellular component assembly;GO:0044085//cellular component biogenesis;GO:0016043//cellular component…
3636963	NBP2	XM_716331.1	Known_gene	1	290111	291139	NC_032095.1	-	1029	1029	147.63	110.23	62.44	115.89	101.35	101.18	106.766	106.14	0.0552234	0.949937	0.890319	0.34923	2.48308e-11	1.36544e-11	-0.698804	4.04844e-24	1.64629e-24	0.123593	0.0117166	0.0086255	K12488//Arf-GAP with SH3 domain, ANK repeat and PH domain-containing protein+ko04144//Endocytosis;K19849//signaling mucin MSB2+ko04011//MAPK signaling pathway - yeast	XP_721424.1|4.3e-202|Nbp2p [Candida albicans SC5314]	GO:0030447//filamentous growth;GO:0007033//vacuole organization;GO:0009987//cellular process;GO:0016043//cellular component organization;GO:0071840//cellular component organization or biogenesis;GO:0030448//hyphal growth;GO:0040007//growth;GO:0006996//organelle organization;
3644545	NEP1	XM_708705.2	Known_gene	1	2495591	2496394	NC_032089.1	+	804	804	56.75	74.43	110.48	111.43	107.05	102.69	80.553	107.056	-0.400046	0.436726	0.209675	-0.973445	1.62605e-36	5.57356e-37	0.0455004	0.421479	0.393254	-0.46434	8.96892e-09	4.5455e-09	K14568//rRNA small subunit pseudouridine methyltransferase Nep1 [EC:2.1.1.260]+ko03008//Ribosome biogenesis in eukaryotes	RLP62404.1|9.6e-149|CAL0001059 ribosomal RNA small subunit methyltransferase NEP1 [Candida albicans Ca529L]	GO:0016072//rRNA metabolic process;GO:0044085//cellular component biogenesis;GO:0042254//ribosome biogenesis;GO:0006725//cellular aromatic compound metabolic process;GO:0043170//macromolecule metabolic process;GO:0016070//RNA metabolic process;GO:0006396//RNA processing;GO:0031167//rRNA methylation;GO:0006807//nitrogen compound metabolic process;GO:0071840//cellular component organization or biog…
3641553	3641553	XM_711698.1	Known_gene	1	69038	71404	NC_032093.1	+	2367	2367	51.25	34.93	15.94	12.08	17.17	21.18	34.04	16.81	0.961851	0.148274	0.0362831	2.08493	2.62651e-172	3.73394e-173	-0.107238	0.292121	0.266412	0.721764	3.55116e-24	1.15766e-24	K11397//chromatin modification-related protein VID21	XP_716791.1|0.0e+00|hypothetical protein CAALFM_C500380WA [Candida albicans SC5314]	GO:1901363//heterocyclic compound binding;GO:0003677//DNA binding;GO:0005488//binding;GO:0097159//organic cyclic compound binding;GO:0003676//nucleic acid binding;
3647593	3647593	XM_705710.1	Known_gene	1	1181749	1185222	NC_032096.1	-	3474	3474	40.45	45.02	37.43	86.98	65.39	71.1	40.966	74.49	-0.809154	0.0557874	0.0081169	-1.10454	2.05584e-171	2.93298e-172	-0.804875	2.53765e-73	5.2126e-74	-0.659284	3.78572e-57	7.6465e-58	K03021//DNA-directed RNA polymerase III subunit RPC2 [EC:2.7.7.6]+ko03020//RNA polymerase	KGQ82551.1|0.0e+00|DNA-directed RNA polymerase III subunit RPC2 [Candida albicans GC75]	GO:0034654//nucleobase-containing compound biosynthetic process;GO:0034641//cellular nitrogen compound metabolic process;GO:0071704//organic substance metabolic process;GO:0044249//cellular biosynthetic process;GO:0044238//primary metabolic process;GO:0046483//heterocycle metabolic process;GO:0009987//cellular process;GO:1901576//organic substance biosynthetic process;GO:0018130//heterocycle bios…
3641252	3641252	XM_712056.1	Known_gene	1	2197235	2198446	NC_032090.1	+	1212	1212	62.98	68.93	49.32	42.5	44.37	47.88	60.41	44.916	0.43671	0.401047	0.181796	0.567431	5.77894e-14	2.97656e-14	0.152588	0.0538927	0.0453606	0.525709	2.29124e-14	9.60234e-15	K14649//transcription initiation factor TFIID subunit 8+ko03022//Basal transcription factors	XP_717149.1|3.3e-225|hypothetical protein CAALFM_C210680WA [Candida albicans SC5314]	GO:0030880//RNA polymerase complex;GO:1902494//catalytic complex;GO:0061695//transferase complex, transferring phosphorus-containing groups;GO:0043233//organelle lumen;GO:0005654//nucleoplasm;GO:1990234//transferase complex;GO:0032991//protein-containing complex;GO:0055029//nuclear DNA-directed RNA polymerase complex;GO:0043231//intracellular membrane-bounded organelle;GO:0005634//nucleus;GO:0000…
3645979	3645979	XM_707343.1	Known_gene	1	1028580	1031093	NC_032094.1	+	2514	2514	201.97	151.84	119.51	165.77	100.06	122.56	157.773	129.463	0.297886	0.646472	0.417242	0.284958	2.47685e-26	1.00202e-26	0.256266	2.50945e-13	1.30208e-13	0.309064	1.77691e-24	5.71204e-25	K13095//splicing factor 1	XP_712436.1|0.0e+00|hypothetical protein CAALFM_C604650WA [Candida albicans SC5314]	GO:0043170//macromolecule metabolic process;GO:0006807//nitrogen compound metabolic process;GO:0044238//primary metabolic process;GO:0006508//proteolysis;GO:0071704//organic substance metabolic process;GO:0019538//protein metabolic process;GO:0008152//metabolic process;GO:1901564//organonitrogen compound metabolic process;GO:0031224//intrinsic component of membrane;GO:0098805//whole membrane;GO:0…
3640987	3640987	XM_712306.2	Known_gene	1	984184	986580	NC_032096.1	-	2397	2397	43.6	53.37	20.84	45.39	37.81	41.42	39.27	41.54	-0.0289684	0.976229	0.944347	-0.0580464	0.321149	0.291142	-0.859413	7.69377e-33	2.6571e-33	0.365701	7.37433e-12	3.3309e-12	K03130//transcription initiation factor TFIID subunit 5+ko03022//Basal transcription factors	XP_717399.2|0.0e+00|chromatin modification protein [Candida albicans SC5314]	NA
3635754	ECM3	XM_717512.2	Known_gene	1	476572	478212	NC_032090.1	+	1641	1641	102.82	96.34	54.87	101.02	94.47	89.23	84.676	94.906	-0.115588	0.884526	0.755977	0.02548	0.605363	0.576372	-0.783839	1.13578e-45	3.18466e-46	0.110606	0.00995543	0.00728548	K07088//uncharacterized protein	XP_722605.2|1.2e-307|putative ATPase [Candida albicans SC5314]	GO:0051179//localization;GO:0006810//transport;GO:0009987//cellular process;GO:0055085//transmembrane transport;GO:0051234//establishment of localization;GO:0016020//membrane;GO:0031224//intrinsic component of membrane;GO:0110165//cellular anatomical entity;GO:0016021//integral component of membrane;
3640752	3640752	XM_712557.2	Known_gene	1	1831872	1832345	NC_032089.1	-	474	474	208.99	110.67	196.43	110.27	103.73	93.44	172.03	102.48	0.723026	0.139551	0.0331048	0.922394	2.09585e-31	7.80154e-32	0.921182	5.91824e-30	2.15658e-30	0.244152	0.00130623	0.000874918	K17918//sorting nexin-3/12+ko04144//Endocytosis	XP_717650.2|1.4e-83|hypothetical protein CAALFM_C108340CA [Candida albicans SC5314]	GO:0042147//retrograde transport, endosome to Golgi;GO:0016197//endosomal transport;GO:0009987//cellular process;GO:0050794//regulation of cellular process;GO:0090087//regulation of peptide transport;GO:0045184//establishment of protein localization;GO:0051234//establishment of localization;GO:0051649//establishment of localization in cell;GO:0050789//regulation of biological process;GO:0032879//…
3640080	3640080	XM_713122.2	Known_gene	1	363823	366783	NC_032096.1	-	2961	2961	9.89	19.68	18.41	30.2	29.69	32.28	15.993	30.723	-0.890989	0.0650139	0.010152	-1.61051	1.90021e-90	3.99324e-91	-0.689487	1.72958e-22	7.2239e-23	-0.71391	5.77883e-26	1.79648e-26	NA	XP_718215.2|0.0e+00|hypothetical protein CAALFM_CR01600CA [Candida albicans SC5314]	NA
3643132	3643132	XM_710119.1	Known_gene	1	891570	891977	NC_032095.1	+	408	408	145.91	65.8	74.49	31.98	62.81	56.02	95.4	50.27	0.884326	0.168199	0.0442572	2.18984	1.27444e-62	3.31628e-63	0.246052	0.0473069	0.0396594	0.232146	0.0244545	0.018611	NA	XP_715212.1|2.0e-73|hypothetical protein CAALFM_C704120WA [Candida albicans SC5314]	NA
3636429	PEX4	XM_716856.1	Known_gene	1	1172085	1172609	NC_032093.1	+	525	525	1263.36	493.3	540.41	501.06	330.94	396.53	765.69	409.51	0.869856	0.160647	0.0413452	1.33421	0	0	0.707485	2.75561e-59	6.51166e-60	0.315035	1.57518e-18	5.8894e-19	K10689//peroxin-4 [EC:2.3.2.23]	XP_721949.1|5.0e-98|E2 ubiquitin-protein ligase peroxin 4 [Candida albicans SC5314]	GO:0072662//protein localization to peroxisome;GO:0044743//protein transmembrane import into intracellular organelle;GO:0015031//protein transport;GO:0016558//protein import into peroxisome matrix;GO:0051234//establishment of localization;GO:0006807//nitrogen compound metabolic process;GO:0006625//protein targeting to peroxisome;GO:0051649//establishment of localization in cell;GO:0006810//transp…
3644994	3644994	XM_019475354.1,BGI_novel_T000131	Known_gene	2	43097	48099	NC_032092.1	-	5003	4777	53.09	22.15	195.04	3.47	2.28	2.67	90.093	2.806	3.4993	2.32318e-09	1.39228e-11	3.93543	0	0	6.41859	0	0	3.0524	1.86823e-88	2.816e-89	K11771//SWI/SNF chromatin-remodeling complex subunit SWI1	XP_019330899.1|2.3e-264|hypothetical protein CAALFM_C400290CA [Candida albicans SC5314]	GO:0006357//regulation of transcription by RNA polymerase II;GO:0044403//symbiotic process;GO:0050794//regulation of cellular process;GO:0051716//cellular response to stimulus;GO:0104004//cellular response to environmental stimulus;GO:0036176//response to neutral pH;GO:0090033//positive regulation of filamentous growth;GO:0008152//metabolic process;GO:0019219//regulation of nucleobase-containing …
30515263	30515263	XM_019475377.1	Known_gene	1	844510	844815	NC_032092.1	-	306	306	1.38	1.72	0.49	0	0.46	0.43	1.196	0.296	0.702943	0.567556	0.326897	7.10852	0.135575	0.116755	0.0911479	0.927214	0.92164	2	0.20004	0.171098	NA	XP_019330922.1|5.6e-49|hypothetical protein CAALFM_C403950CA [Candida albicans SC5314]	GO:0110165//cellular anatomical entity;GO:0031224//intrinsic component of membrane;GO:0016020//membrane;GO:0016021//integral component of membrane;
30515277	30515277	XM_019475390.1	Known_gene	1	1290067	1290333	NC_032092.1	+	267	267	102.68	81.38	81.22	28.09	31.96	77.73	88.426	45.926	0.924803	0.175339	0.0471404	1.87003	3.23955e-18	1.51508e-18	1.34557	7.26641e-10	4.18656e-10	0.0662028	0.166391	0.140332	K22069//LYR motif-containing protein 4	XP_019330935.1|1.3e-41|hypothetical protein CAALFM_C405820WA [Candida albicans SC5314]	GO:0071840//cellular component organization or biogenesis;GO:0044237//cellular metabolic process;GO:0008152//metabolic process;GO:0006790//sulfur compound metabolic process;GO:0016226//iron-sulfur cluster assembly;GO:0031163//metallo-sulfur cluster assembly;GO:0022607//cellular component assembly;GO:0044085//cellular component biogenesis;GO:0009987//cellular process;GO:0016043//cellular component…
3644107	3644107	XM_709173.1	Known_gene	1	1903774	1904226	NC_032090.1	+	453	453	0	0	0	0	0	0.23	0	0.076	-0.0781299	0.879501	0.746891	NA	NA	NA	NA	NA	NA	-4.52356	0.595451	0.556828	NA	XP_714266.1|1.5e-77|hypothetical protein CAALFM_C209340WA [Candida albicans SC5314]	NA
3636902	NGG1	XM_716428.1	Known_gene	1	686628	688511	NC_032089.1	+	1884	1884	51.28	71.36	19.39	26.53	34.2	38.86	47.343	33.196	0.511516	0.512981	0.274211	0.950772	1.82805e-42	5.8435e-43	-0.818684	1.5654e-21	6.65582e-22	0.87683	1.30339e-52	2.76404e-53	K11315//transcriptional adapter 3	XP_721521.1|0.0e+00|histone acetyltransferase [Candida albicans SC5314]	GO:0043170//macromolecule metabolic process;GO:2001141//regulation of RNA biosynthetic process;GO:0006996//organelle organization;GO:0043967//histone H4 acetylation;GO:1901564//organonitrogen compound metabolic process;GO:1903506//regulation of nucleic acid-templated transcription;GO:0043543//protein acylation;GO:0016043//cellular component organization;GO:0006357//regulation of transcription by …
3641157	SCS7	XM_712134.1	Known_gene	1	987763	988899	NC_032092.1	+	1137	1137	507.42	403.05	339.4	211.16	168.69	221.93	416.623	200.593	1.03377	0.0183844	0.0017506	1.26484	0	0	1.00861	4.57355e-169	4.8424e-170	0.860854	4.64661e-166	4.59898e-167	K19703//4-hydroxysphinganine ceramide fatty acyl 2-hydroxylase [EC:1.14.18.6]	XP_717227.1|1.2e-229|fatty acid alpha-hydroxylase [Candida albicans SC5314]	GO:0006631//fatty acid metabolic process;GO:0006807//nitrogen compound metabolic process;GO:0009058//biosynthetic process;GO:0006629//lipid metabolic process;GO:0006644//phospholipid metabolic process;GO:0006672//ceramide metabolic process;GO:0046467//membrane lipid biosynthetic process;GO:1901566//organonitrogen compound biosynthetic process;GO:0043436//oxoacid metabolic process;GO:0006793//phos…
3638312	3638312	XM_714953.1	Known_gene	1	752036	752503	NC_032091.1	+	468	468	20.24	9.9	12.94	15.27	7.52	14.52	14.36	12.436	0.220356	0.821244	0.648802	0.406509	0.0978142	0.082975	0.783033	0.0138137	0.0110731	-0.552541	0.107899	0.088426	K15542//polyadenylation factor subunit 2+ko03015//mRNA surveillance pathway;K00587//protein-S-isoprenylcysteine O-methyltransferase [EC:2.1.1.100]+ko00900//Terpenoid backbone biosynthesis+ko01130//Biosynthesis of antibiotics	XP_720046.1|4.1e-83|hypothetical protein CAALFM_C303530WA [Candida albicans SC5314]	GO:0016020//membrane;GO:0016021//integral component of membrane;GO:0110165//cellular anatomical entity;GO:0031224//intrinsic component of membrane;
30514966	30514966	XM_019475069.1	Known_gene	1	400591	401977	NC_032089.1	+	1387	1101	24.5	17.64	83.67	81.21	93.52	59.39	41.936	78.04	-0.860434	0.231964	0.0725353	-1.72888	2.43641e-91	5.09966e-92	-0.160564	0.0161183	0.0129932	-1.75137	9.1306e-66	1.67392e-66	NA	XP_019330614.1|3.3e-208|hypothetical protein CAALFM_C101930WA [Candida albicans SC5314]	NA
3635593	3635593	XM_717589.2	Known_gene	1	359054	360847	NC_032092.1	-	1794	1794	4.23	2.55	18.94	6.2	3.75	1.54	8.573	3.83	0.859237	0.358856	0.14833	-0.551611	0.00520711	0.00394544	2.33647	4.22959e-54	1.05316e-54	0.727567	0.0206033	0.0155416	K01293//Gly-Xaa carboxypeptidase [EC:3.4.17.4]	XP_722682.2|0.0e+00|hypothetical protein CAALFM_C401830CA [Candida albicans SC5314]	GO:0071704//organic substance metabolic process;GO:0043170//macromolecule metabolic process;GO:0044237//cellular metabolic process;GO:0006508//proteolysis;GO:0044265//cellular macromolecule catabolic process;GO:0044257//cellular protein catabolic process;GO:0044248//cellular catabolic process;GO:0006807//nitrogen compound metabolic process;GO:1901575//organic substance catabolic process;GO:004423…
3641023	3641023	XM_712261.2	Known_gene	1	915381	917402	NC_032096.1	-	2022	2022	80.11	73.58	88.81	55.7	88.96	78.22	80.833	74.293	0.116645	0.85889	0.710187	0.524305	8.39427e-26	3.41562e-26	-0.00243465	0.97201	0.970224	-0.0882239	0.127613	0.10604	K09540//translocation protein SEC63+ko04141//Protein processing in endoplasmic reticulum+ko03060//Protein export	XP_717354.2|0.0e+00|protein-transporting protein [Candida albicans SC5314]	GO:0055085//transmembrane transport;GO:0015031//protein transport;GO:0006614//SRP-dependent cotranslational protein targeting to membrane;GO:0015833//peptide transport;GO:0090150//establishment of protein localization to membrane;GO:0034613//cellular protein localization;GO:0045047//protein targeting to ER;GO:0051649//establishment of localization in cell;GO:0009987//cellular process;GO:0033036//…
3647302	3647302	XM_706008.2	Known_gene	1	1034922	1035491	NC_032096.1	-	570	570	9.9	9.59	22.14	9.22	11.73	17.17	13.876	12.706	0.0969324	0.925298	0.832114	0.102662	0.737714	0.712638	0.916452	2.23101e-05	1.53429e-05	-0.840287	0.00141439	0.00094974	NA	KGR01950.1|1.4e-101|hypothetical protein MG5_05810 [Candida albicans P57072]	GO:0110165//cellular anatomical entity;GO:0016021//integral component of membrane;GO:0031224//intrinsic component of membrane;GO:0016020//membrane;
3647903	3647903	XM_705398.2	Known_gene	1	18679	20661	NC_032094.1	-	1983	1983	646.44	409.76	350.77	286.42	267.56	277.62	468.99	277.2	0.743291	0.151582	0.0376242	1.17438	0	0	0.390663	2.67481e-61	6.18672e-62	0.561668	1.69111e-145	1.8187e-146	K11841//ubiquitin carboxyl-terminal hydrolase 10 [EC:3.4.19.12]+ko04139//Mitophagy - yeast	XP_710490.2|0.0e+00|mRNA-binding ubiquitin-specific protease [Candida albicans SC5314]	GO:0044238//primary metabolic process;GO:0009056//catabolic process;GO:0006508//proteolysis;GO:0006807//nitrogen compound metabolic process;GO:0030163//protein catabolic process;GO:0006511//ubiquitin-dependent protein catabolic process;GO:0043170//macromolecule metabolic process;GO:0019941//modification-dependent protein catabolic process;GO:1901565//organonitrogen compound catabolic process;GO:0…
3644114	3644114	XM_709150.1	Known_gene	1	1862511	1862975	NC_032090.1	-	465	465	23.25	25.32	17.08	15.42	27.59	23.85	21.883	22.286	0.0287604	0.976687	0.946769	0.592428	0.0114354	0.00888676	-0.691837	0.00260359	0.00199835	0.0862881	0.452823	0.412266	K20047//actin cytoskeleton-regulatory complex protein PAN1	XP_024674036.1|6.8e-06|hypothetical protein BDW47DRAFT_102106 [Aspergillus candidus]	NA
3646071	3646071	XM_707216.2	Known_gene	1	47121	49541	NC_032094.1	+	2421	2421	41.26	41.36	58.11	68.18	84.47	62.35	46.91	71.666	-0.599191	0.173826	0.0464675	-0.724605	3.04679e-46	9.32606e-47	-0.539653	1.3595e-32	4.72692e-33	-0.592153	1.23811e-28	3.68666e-29	K14023//ERAD-associated E3 ubiquitin-protein ligase component HRD3+ko04141//Protein processing in endoplasmic reticulum	XP_712309.2|0.0e+00|ubiquitin ligase complex subunit [Candida albicans SC5314]	GO:0044237//cellular metabolic process;GO:0030163//protein catabolic process;GO:0051716//cellular response to stimulus;GO:0009987//cellular process;GO:0071704//organic substance metabolic process;GO:0006508//proteolysis;GO:0010243//response to organonitrogen compound;GO:1901575//organic substance catabolic process;GO:0030433//ubiquitin-dependent ERAD pathway;GO:0036503//ERAD pathway;GO:0044260//c…
3643729	MTLA1	BGI_novel_T000168,XM_019475414.1	Known_gene	2	392524	394455	NC_032093.1	-	1932	1858	37.43	22.9	78.96	68.79	50.93	75.86	46.43	65.193	-0.335289	0.639729	0.409482	-0.878004	1.04568e-15	5.14612e-16	0.632606	1.99983e-17	9.27442e-18	-1.72799	1.41618e-44	3.31496e-45	K09358//mating-type protein A1+ko04113//Meiosis - yeast;K02646//regulatory protein PHO2+ko04111//Cell cycle - yeast;K09358//mating-type protein A1+ko04113//Meiosis - yeast	XP_019330959.1|2.6e-109|Mtla1p [Candida albicans SC5314]	GO:0010556//regulation of macromolecule biosynthetic process;GO:1903507//negative regulation of nucleic acid-templated transcription;GO:0010468//regulation of gene expression;GO:0051252//regulation of RNA metabolic process;GO:0031326//regulation of cellular biosynthetic process;GO:0010629//negative regulation of gene expression;GO:0031138//negative regulation of conjugation with cellular fusion;G…
3643121	3643121	XM_710108.1	Known_gene	1	907552	908649	NC_032095.1	-	1098	1098	129.13	98.43	103.1	84.51	93.13	55.81	110.22	77.816	0.488453	0.375239	0.16079	0.61163	9.29024e-28	3.67596e-28	0.146726	0.0102903	0.0081542	0.818574	5.1467e-37	1.33532e-37	K01738//cysteine synthase [EC:2.5.1.47]+ko00920//Sulfur metabolism+ko01100//Metabolic pathways+ko01230//Biosynthesis of amino acids+ko01130//Biosynthesis of antibiotics+ko01110//Biosynthesis of secondary metabolites+ko00270//Cysteine and methionine metabolism+ko01200//Carbon metabolism	XP_715201.1|2.8e-207|hypothetical protein CAALFM_C704210CA [Candida albicans SC5314]	GO:0000097//sulfur amino acid biosynthetic process;GO:0016053//organic acid biosynthetic process;GO:0009070//serine family amino acid biosynthetic process;GO:0044249//cellular biosynthetic process;GO:0044283//small molecule biosynthetic process;GO:0044237//cellular metabolic process;GO:0006807//nitrogen compound metabolic process;GO:0006534//cysteine metabolic process;GO:0019344//cysteine biosynt…
3644770	HAT1	XM_708496.2	Known_gene	1	970917	972158	NC_032089.1	+	1242	1242	7.67	8.06	11.15	20.44	25.03	17.02	8.96	20.83	-1.15795	0.0104535	0.000826602	-1.4141	8.66338e-21	3.85152e-21	-1.16661	4.88034e-18	2.22582e-18	-1.07838	2.43552e-11	1.12179e-11	K11303//histone acetyltransferase 1 [EC:2.3.1.48]	XP_713589.1|7.7e-238|histone acetyltransferase catalytic subunit [Candida albicans SC5314]	GO:1902679//negative regulation of RNA biosynthetic process;GO:0010558//negative regulation of macromolecule biosynthetic process;GO:2001141//regulation of RNA biosynthetic process;GO:0031324//negative regulation of cellular metabolic process;GO:0060255//regulation of macromolecule metabolic process;GO:0051128//regulation of cellular component organization;GO:0097549//chromatin organization invol…
3639564	MEF2	XM_713705.2	Known_gene	1	1490452	1492731	NC_032089.1	+	2280	2280	38.57	46.05	48.6	22.26	21.51	24.85	44.406	22.873	0.927027	0.0114817	0.000940403	0.793026	2.76566e-29	1.06514e-29	1.17595	3.03621e-67	6.63728e-68	0.889955	1.13637e-42	2.723e-43	K02355//elongation factor G	XP_718798.2|0.0e+00|Mef2p [Candida albicans SC5314]	GO:0071704//organic substance metabolic process;GO:0009059//macromolecule biosynthetic process;GO:0043604//amide biosynthetic process;GO:0043043//peptide biosynthetic process;GO:0022411//cellular component disassembly;GO:0006518//peptide metabolic process;GO:0008152//metabolic process;GO:0044260//cellular macromolecule metabolic process;GO:0044271//cellular nitrogen compound biosynthetic process;…
3634766	3634766	XM_718409.1	Known_gene	1	2094630	2095979	NC_032089.1	-	1350	1350	45.98	47.5	125.82	53.83	38.48	60.13	73.1	50.813	0.445311	0.510102	0.270744	-0.227404	0.0020012	0.00147242	1.70918	4.37002e-171	4.56852e-172	-0.340157	6.58185e-06	3.81462e-06	K19787//carnosine N-methyltransferase [EC:2.1.1.22]+ko00340//Histidine metabolism	XP_723502.1|5.0e-259|hypothetical protein CAALFM_C109520CA [Candida albicans SC5314]	GO:0016021//integral component of membrane;GO:0016020//membrane;GO:0110165//cellular anatomical entity;GO:0031224//intrinsic component of membrane;GO:0003824//catalytic activity;GO:0008757//S-adenosylmethionine-dependent methyltransferase activity;GO:0008168//methyltransferase activity;GO:0016741//transferase activity, transferring one-carbon groups;GO:0016740//transferase activity;
3643793	3643793	XM_709467.2	Known_gene	1	1977647	1978303	NC_032090.1	+	657	657	186.77	178.6	211.61	215.56	209.25	280.75	192.326	235.186	-0.259758	0.600128	0.362299	-0.206827	0.000206856	0.000144578	0.0161802	0.595217	0.570466	-0.652554	2.85411e-31	8.09568e-32	K14839//nucleolar protein 16	XP_714560.2|1.7e-119|hypothetical protein CAALFM_C209660WA [Candida albicans SC5314]	GO:0008152//metabolic process;GO:0006807//nitrogen compound metabolic process;GO:0046483//heterocycle metabolic process;GO:0016072//rRNA metabolic process;GO:0044238//primary metabolic process;GO:0044237//cellular metabolic process;GO:0034470//ncRNA processing;GO:0044085//cellular component biogenesis;GO:0009987//cellular process;GO:0006725//cellular aromatic compound metabolic process;GO:1901360…
3643103	MAM33	XM_710143.1	Known_gene	1	862087	862881	NC_032095.1	-	795	795	107.34	102.43	511.54	80.82	86.41	68.29	240.436	78.506	1.34231	0.0499363	0.00686655	0.409404	1.64462e-08	9.79832e-09	2.56558	0	0	0.584892	2.69559e-16	1.06583e-16	K15414//complement component 1 Q subcomponent-binding protein, mitochondrial	XP_715236.1|2.7e-143|Mam33p [Candida albicans SC5314]	GO:0031325//positive regulation of cellular metabolic process;GO:0032270//positive regulation of cellular protein metabolic process;GO:0051171//regulation of nitrogen compound metabolic process;GO:0010628//positive regulation of gene expression;GO:0010557//positive regulation of macromolecule biosynthetic process;GO:0009889//regulation of biosynthetic process;GO:0048518//positive regulation of bi…
3642060	WRS1	XM_711202.2	Known_gene	1	2696433	2697707	NC_032089.1	-	1275	1275	36.54	54.79	94.29	111.08	81.51	69.35	61.873	87.313	-0.490446	0.423646	0.198882	-1.60405	4.1066e-132	6.94518e-133	0.210128	0.000183333	0.00013205	-0.339983	2.98397e-06	1.69581e-06	K01867//tryptophanyl-tRNA synthetase [EC:6.1.1.2]+ko00970//Aminoacyl-tRNA biosynthesis	XP_716295.1|1.8e-245|tryptophan--tRNA ligase [Candida albicans SC5314]	GO:0009058//biosynthetic process;GO:0043604//amide biosynthetic process;GO:0009987//cellular process;GO:0044260//cellular macromolecule metabolic process;GO:0043043//peptide biosynthetic process;GO:0009059//macromolecule biosynthetic process;GO:0006082//organic acid metabolic process;GO:0043039//tRNA aminoacylation;GO:0044237//cellular metabolic process;GO:0016070//RNA metabolic process;GO:001953…
3638867	DFG5	XM_714429.1	Known_gene	1	82824	84179	NC_032090.1	+	1356	1356	142.53	104.48	86.52	78.43	72.79	109.31	111.176	86.843	0.369889	0.541858	0.301373	0.861788	1.08364e-68	2.66918e-69	0.249293	1.32896e-05	9.03948e-06	-0.0651986	0.39222	0.35228	K08257//mannan endo-1,6-alpha-mannosidase [EC:3.2.1.101]	XP_719522.1|2.0e-271|putative mannan endo-1,6-alpha-mannosidase [Candida albicans SC5314]	GO:0070887//cellular response to chemical stimulus;GO:0071704//organic substance metabolic process;GO:0032505//reproduction of a single-celled organism;GO:0050896//response to stimulus;GO:0030447//filamentous growth;GO:1901575//organic substance catabolic process;GO:0031505//fungal-type cell wall organization;GO:0005975//carbohydrate metabolic process;GO:0016043//cellular component organization;G…
3635793	3635793	XM_717458.2,BGI_novel_T000051	Known_gene	2	360838	363732	NC_032090.1	-	2895	2808	1459.9	1112.48	139.31	72.92	94.55	52.06	903.896	73.176	3.11665	4.10051e-06	6.6897e-08	4.32341	0	0	0.559149	2.52574e-40	7.66832e-41	4.41746	0	0	K19487//transcription factor SFP1	XP_722551.2|1.6e-204|hypothetical protein CAALFM_C201930CA [Candida albicans SC5314]	NA
3647390	HEM13	XM_705907.1	Known_gene	1	846209	847180	NC_032091.1	-	972	972	47.31	31.7	133.78	50.8	57.58	33.88	70.93	47.42	0.460541	0.560293	0.320081	-0.102683	0.263467	0.235232	1.21622	4.84734e-76	9.74648e-77	-0.095951	0.568277	0.52817	K00228//coproporphyrinogen III oxidase [EC:1.3.3.3]+ko00860//Porphyrin and chlorophyll metabolism+ko01100//Metabolic pathways+ko01110//Biosynthesis of secondary metabolites	XP_710999.1|2.6e-193|coproporphyrinogen oxidase [Candida albicans SC5314]	GO:0046483//heterocycle metabolic process;GO:0006783//heme biosynthetic process;GO:0006725//cellular aromatic compound metabolic process;GO:0006779//porphyrin-containing compound biosynthetic process;GO:0006807//nitrogen compound metabolic process;GO:1901362//organic cyclic compound biosynthetic process;GO:0019438//aromatic compound biosynthetic process;GO:0006782//protoporphyrinogen IX biosynthe…
3648179	SPB1	XM_705132.2	Known_gene	1	913551	916088	NC_032094.1	-	2538	2538	35.76	101.32	49.45	156.35	125.32	134.01	62.176	138.56	-1.03165	0.0813514	0.0142064	-2.12836	0	0	-1.34157	1.68571e-229	1.36253e-230	-0.403422	1.68469e-31	4.7588e-32	K14857//AdoMet-dependent rRNA methyltransferase SPB1 [EC:2.1.1.-]	XP_710224.1|0.0e+00|27S pre-rRNA (guanosine2922-2'-O)-methyltransferase [Candida albicans SC5314]	GO:0000466//maturation of 5.8S rRNA from tricistronic rRNA transcript (SSU-rRNA, 5.8S rRNA, LSU-rRNA);GO:0010467//gene expression;GO:0043170//macromolecule metabolic process;GO:0043412//macromolecule modification;GO:0031167//rRNA methylation;GO:0034470//ncRNA processing;GO:0042254//ribosome biogenesis;GO:0006807//nitrogen compound metabolic process;GO:0016072//rRNA metabolic process;GO:0071840//c…
3636632	3636632	XM_716685.2	Known_gene	1	307532	307839	NC_032091.1	-	308	308	NA	NA	NA	NA	NA	NA	NA	NA	NA	NA	NA	NA	NA	NA	NA	NA	NA	NA	NA	NA	K15075//DNA repair/transcription protein MET18/MMS19	XP_721778.2|2.0e-46|hypothetical protein CAALFM_C301440CA, partial [Candida albicans SC5314]	NA
3647479	3647479	XM_705832.2	Known_gene	1	1215977	1216873	NC_032090.1	-	897	897	0.8	2.05	3.74	5.79	3.4	0.75	2.196	3.313	-0.476689	0.685579	0.464835	-2.85549	1.4131e-10	7.91024e-11	0.137504	0.682089	0.658168	1.45066	0.0144047	0.010711	K10847//DNA-repair protein complementing XP-A cells+ko03420//Nucleotide excision repair;K01068//acyl-coenzyme A thioesterase 1/2/4 [EC:3.1.2.2]+ko01100//Metabolic pathways+ko01110//Biosynthesis of secondary metabolites+ko00062//Fatty acid elongation+ko01040//Biosynthesis of unsaturated fatty acids;K11992//acyl-CoA thioesterase 8 [EC:3.1.2.27]+ko04146//Peroxisome+ko01100//Metabolic pathways	XP_710924.2|6.0e-168|hypothetical protein CAALFM_C205960CA [Candida albicans SC5314]	GO:0072521//purine-containing compound metabolic process;GO:0044281//small molecule metabolic process;GO:0033865//nucleoside bisphosphate metabolic process;GO:0016042//lipid catabolic process;GO:0016054//organic acid catabolic process;GO:0032787//monocarboxylic acid metabolic process;GO:0008152//metabolic process;GO:0043436//oxoacid metabolic process;GO:0006139//nucleobase-containing compound met…
3641155	3641155	XM_712132.2	Known_gene	1	996059	997609	NC_032092.1	-	1551	1551	138.45	139.05	30.81	89.42	82.83	114.7	102.77	95.65	0.155743	0.884048	0.755127	0.630696	1.95027e-45	6.00888e-46	-1.42675	3.19422e-98	5.21702e-99	0.277738	3.51618e-12	1.57049e-12	K06125//4-hydroxybenzoate polyprenyltransferase [EC:2.5.1.39]+ko00130//Ubiquinone and other terpenoid-quinone biosynthesis+ko01100//Metabolic pathways+ko01110//Biosynthesis of secondary metabolites;K15334//multisite-specific tRNA:(cytosine-C5)-methyltransferase [EC:2.1.1.202];K04563//cyclin-dependent kinase [EC:2.7.11.22]+ko04011//MAPK signaling pathway - yeast+ko04113//Meiosis - yeast+ko04111//C…	XP_717225.2|8.8e-300|hypothetical protein CAALFM_C404620CA [Candida albicans SC5314]	GO:0005622//intracellular;GO:0043231//intracellular membrane-bounded organelle;GO:0005634//nucleus;GO:0043226//organelle;GO:0110165//cellular anatomical entity;GO:0043229//intracellular organelle;GO:0043227//membrane-bounded organelle;GO:0003676//nucleic acid binding;GO:0005488//binding;GO:1901363//heterocyclic compound binding;GO:0097159//organic cyclic compound binding;GO:0003677//DNA binding;
3640415	3640415	XM_712872.1	Known_gene	1	189237	189632	NC_032096.1	+	396	396	32.3	39.87	67.79	46.49	51.15	38.91	46.653	45.516	0.0393969	0.963602	0.916922	-0.525386	0.00411745	0.00309912	0.406338	0.00394105	0.00305254	0.0351626	0.497481	0.457104	K12594//M-phase phosphoprotein 6, fungi type+ko03018//RNA degradation	XP_717965.1|7.0e-68|hypothetical protein CAALFM_CR00810WA [Candida albicans SC5314]	NA
3636664	3636664	XM_716666.2	Known_gene	1	353503	354663	NC_032091.1	+	1161	1161	390.49	271.01	584.76	494.75	521.17	413.16	415.42	476.36	-0.208543	0.734367	0.531796	-0.341414	2.38603e-38	8.00672e-39	0.166091	6.54683e-13	3.44288e-13	-0.608355	5.29792e-83	8.44854e-84	K03953//NADH dehydrogenase (ubiquinone) 1 alpha subcomplex subunit 9+ko01100//Metabolic pathways+ko00190//Oxidative phosphorylation	XP_721759.2|1.6e-221|hypothetical protein CAALFM_C301610WA [Candida albicans SC5314]	GO:0042180//cellular ketone metabolic process;GO:0071704//organic substance metabolic process;GO:0042181//ketone biosynthetic process;GO:0006744//ubiquinone biosynthetic process;GO:0044249//cellular biosynthetic process;GO:1901006//ubiquinone-6 biosynthetic process;GO:0009058//biosynthetic process;GO:1901663//quinone biosynthetic process;GO:0009987//cellular process;GO:0008152//metabolic process;…
3646067	CPH2	XM_707212.2	Known_gene	1	32516	35077	NC_032094.1	+	2562	2562	111.8	143.43	117.63	171.46	245.45	207.83	124.286	208.246	-0.698742	0.126174	0.028083	-0.616952	1.97952e-91	4.14002e-92	-1.06117	0	0	-0.535057	1.15762e-81	1.87134e-82	K09074//fungal twist-like factor	XP_712305.1|0.0e+00|Cph2p [Candida albicans SC5314]	GO:0048584//positive regulation of response to stimulus;GO:0070887//cellular response to chemical stimulus;GO:0060255//regulation of macromolecule metabolic process;GO:0031323//regulation of cellular metabolic process;GO:0036178//filamentous growth of a population of unicellular organisms in response to neutral pH;GO:0051171//regulation of nitrogen compound metabolic process;GO:0035690//cellular …
3647886	3647886	XM_705426.1	Known_gene	1	10151	11086	NC_032093.1	-	936	936	45.57	32.03	69.78	52.93	35.78	49.39	49.126	46.033	0.0746983	0.925298	0.832922	-0.216001	0.0189005	0.0149286	0.96366	4.91067e-27	1.8903e-27	-0.624795	3.89718e-09	1.9404e-09	K17268//coatomer subunit epsilon	XP_710518.1|1.9e-172|coatomer subunit epsilon [Candida albicans SC5314]	GO:0015833//peptide transport;GO:0009987//cellular process;GO:0015031//protein transport;GO:0033036//macromolecule localization;GO:0051649//establishment of localization in cell;GO:0051234//establishment of localization;GO:0042886//amide transport;GO:0051641//cellular localization;GO:0008104//protein localization;GO:0006891//intra-Golgi vesicle-mediated transport;GO:0045184//establishment of prot…
3634804	3634804	XM_718388.2	Known_gene	1	2055982	2059482	NC_032089.1	-	3501	3501	29.1	42.88	10.55	25.66	30.18	33.32	27.51	29.72	-0.046595	0.965943	0.921554	0.181498	0.00236814	0.00175231	-1.51635	4.32684e-94	7.30534e-95	0.363917	1.34703e-13	5.772e-14	NA	XP_723481.2|0.0e+00|hypothetical protein CAALFM_C109340CA [Candida albicans SC5314]	NA
3637704	3637704	XM_715552.1	Known_gene	1	688982	689980	NC_032093.1	-	999	999	13.1	16.44	22.71	15.72	14.68	14.18	17.416	14.86	0.210023	0.738427	0.536517	-0.263034	0.113813	0.0971564	0.629476	1.19712e-05	8.12076e-06	0.213353	0.138376	0.115449	NA	XP_720645.1|2.5e-186|hypothetical protein CAALFM_C503100CA [Candida albicans SC5314]	GO:0003676//nucleic acid binding;GO:0003729//mRNA binding;GO:0000339//RNA cap binding;GO:0000340//RNA 7-methylguanosine cap binding;GO:0003723//RNA binding;GO:0097159//organic cyclic compound binding;GO:0005488//binding;GO:1901363//heterocyclic compound binding;
3647922	3647922	XM_705393.2	Known_gene	1	7510	8043	NC_032090.1	-	534	534	0.39	1.35	1.86	0.75	1.7	0	1.2	0.816	0.269464	0.864735	0.720349	-0.943416	0.513959	0.481342	0.129768	0.833386	0.817242	7.07682	0.00688311	0.00495616	NA	XP_710485.2|7.2e-100|hypothetical protein CAALFM_C200050CA [Candida albicans SC5314]	GO:0071554//cell wall organization or biogenesis;GO:0071852//fungal-type cell wall organization or biogenesis;GO:0009987//cellular process;GO:0045229//external encapsulating structure organization;GO:0071555//cell wall organization;GO:0071840//cellular component organization or biogenesis;GO:0031505//fungal-type cell wall organization;GO:0016043//cellular component organization;GO:0071944//cell p…
30515371	30515371	XM_019475506.1	Known_gene	1	206330	206494	NC_032096.1	+	165	165	1.72	14.68	5.56	0	0	4.71	7.32	1.57	0.861924	0.470774	0.234956	7.42626	0.515604	0.483228	9.11894	0.11605	0.100836	1.64005	0.0266696	0.0203596	NA	XP_019331051.1|7.3e-19|hypothetical protein CAALFM_CR00910WA [Candida albicans SC5314]	GO:0016021//integral component of membrane;GO:0110165//cellular anatomical entity;GO:0016020//membrane;GO:0031224//intrinsic component of membrane;GO:0097159//organic cyclic compound binding;GO:1901363//heterocyclic compound binding;GO:0005488//binding;GO:0003676//nucleic acid binding;
3635831	3635831	XM_717446.2	Known_gene	1	334153	335997	NC_032090.1	-	1845	1845	14.97	20.56	23.77	18.78	15.74	22.24	19.766	18.92	0.0599189	0.934064	0.851825	-0.327123	0.00221932	0.00163699	0.594706	1.90597e-09	1.11754e-09	-0.113317	0.322017	0.284572	K11786//ATP-dependent helicase STH1/SNF2 [EC:3.6.4.-]	XP_722539.2|0.0e+00|hypothetical protein CAALFM_C201820CA [Candida albicans SC5314]	GO:0006725//cellular aromatic compound metabolic process;GO:0009987//cellular process;GO:0090304//nucleic acid metabolic process;GO:0016070//RNA metabolic process;GO:0043170//macromolecule metabolic process;GO:0008152//metabolic process;GO:0046483//heterocycle metabolic process;GO:1901360//organic cyclic compound metabolic process;GO:0010467//gene expression;GO:0006807//nitrogen compound metaboli…
3638025	GAC1	XM_715252.1	Known_gene	1	115894	117909	NC_032095.1	+	2016	2016	202.37	328.01	630.69	517.83	742.75	603.69	387.023	621.423	-0.673536	0.263849	0.0889215	-1.35548	0	0	-0.235946	2.79384e-48	7.56782e-49	-0.880068	0	0	K19849//signaling mucin MSB2+ko04011//MAPK signaling pathway - yeast;K22016//mucin-3/17	XP_720345.1|0.0e+00|protein phosphatase regulator [Candida albicans SC5314]	NA
3641359	POL3	XM_711911.2	Known_gene	1	597970	601086	NC_032095.1	-	3117	3117	94.08	64.53	36.62	45.21	41.25	60.28	65.076	48.913	0.423121	0.548691	0.308918	1.05725	8.56629e-155	1.30388e-155	-0.171762	0.00169999	0.00129203	0.0982906	0.0124746	0.00921286	K02327//DNA polymerase delta subunit 1 [EC:2.7.7.7]+ko03430//Mismatch repair+ko03440//Homologous recombination+ko03420//Nucleotide excision repair+ko03030//DNA replication+ko03410//Base excision repair	XP_717004.2|0.0e+00|DNA-directed DNA polymerase delta [Candida albicans SC5314]	GO:0006278//RNA-dependent DNA biosynthetic process;GO:0019438//aromatic compound biosynthetic process;GO:0018130//heterocycle biosynthetic process;GO:1901575//organic substance catabolic process;GO:0009059//macromolecule biosynthetic process;GO:0071704//organic substance metabolic process;GO:0006139//nucleobase-containing compound metabolic process;GO:0034641//cellular nitrogen compound metabolic…
3643194	PRP13	XM_710035.2	Known_gene	1	849445	852048	NC_032096.1	+	2604	2604	29.04	14.7	63.82	20.61	17.89	17.48	35.853	18.66	0.803078	0.222156	0.0678266	0.494697	7.95646e-12	4.3153e-12	1.83486	7.55986e-195	6.99426e-196	-0.249889	0.00891941	0.00649284	NA	XP_715128.2|0.0e+00|Prp13p [Candida albicans SC5314]	GO:0000002//mitochondrial genome maintenance;GO:0043170//macromolecule metabolic process;GO:0009987//cellular process;GO:0016070//RNA metabolic process;GO:0007005//mitochondrion organization;GO:0006396//RNA processing;GO:0006996//organelle organization;GO:0071840//cellular component organization or biogenesis;GO:0008152//metabolic process;GO:1901360//organic cyclic compound metabolic process;GO:0…
3643912	3643912	XM_709366.2	Known_gene	1	1753778	1755259	NC_032090.1	+	1482	1482	74.63	67.43	219.71	242.95	154.29	294.3	120.59	230.513	-0.89259	0.159197	0.0407069	-1.70283	0	0	0.509956	4.17219e-46	1.16428e-46	-2.12583	0	0	K01309//ubiquitin carboxyl-terminal hydrolase MINDY-1/2 [EC:3.4.19.12]	XP_714459.2|2.0e-285|hypothetical protein CAALFM_C208620WA [Candida albicans SC5314]	GO:0044260//cellular macromolecule metabolic process;GO:0044237//cellular metabolic process;GO:0016579//protein deubiquitination;GO:0008152//metabolic process;GO:0036211//protein modification process;GO:1901564//organonitrogen compound metabolic process;GO:0019538//protein metabolic process;GO:0006807//nitrogen compound metabolic process;GO:0070647//protein modification by small protein conjugati…
3645718	DSL1	XM_707567.2	Known_gene	1	1487266	1489308	NC_032096.1	+	2043	2043	1.82	2.26	3.14	4.47	2.8	1.97	2.406	3.08	-0.33255	0.686903	0.467302	-1.29634	9.69063e-08	5.92764e-08	0.165338	0.499073	0.471652	0.198127	0.482299	0.440966	K11578//protein transport protein DSL1/ZW10	XP_712660.2|0.0e+00|Dsl1p [Candida albicans SC5314]	NA
6335359	6335359	XM_441049.2	Known_gene	1	1298889	1299875	NC_032096.1	+	987	987	168.37	108.64	133.02	109.95	94.31	136.23	136.676	113.496	0.276726	0.630331	0.398849	0.614787	5.10574e-32	1.87661e-32	0.496161	7.58927e-18	3.48412e-18	-0.326489	1.02584e-07	5.43518e-08	K08266//target of rapamycin complex subunit LST8+ko04136//Autophagy - other+ko04138//Autophagy - yeast	XP_441049.1|1.1e-191|TOR complex subunit [Candida albicans SC5314]	GO:0051128//regulation of cellular component organization;GO:0031929//TOR signaling;GO:0050789//regulation of biological process;GO:0007154//cell communication;GO:0050794//regulation of cellular process;GO:0023052//signaling;GO:0050896//response to stimulus;GO:0065007//biological regulation;GO:0033043//regulation of organelle organization;GO:0009987//cellular process;GO:0007165//signal transducti…
30515140	30515140	XM_019475247.1	Known_gene	1	1345071	1345313	NC_032090.1	-	243	243	0.72	0	0	0	0	0	0.24	0	0.0914321	0.867143	0.724696	6.16993	0.515512	0.483228	NA	NA	NA	NA	NA	NA	NA	XP_019330792.1|2.1e-38|hypothetical protein CAALFM_C206610CA, partial [Candida albicans SC5314]	GO:0110165//cellular anatomical entity;GO:0016020//membrane;GO:0016021//integral component of membrane;GO:0031224//intrinsic component of membrane;
3646150	VPS16	XM_707143.2	Known_gene	1	936078	938918	NC_032089.1	-	2841	2841	14.56	13.17	12.39	12.65	11.8	13.77	13.373	12.74	0.0833957	0.900643	0.785645	0.202873	0.0332167	0.0267814	0.0703893	0.485683	0.457944	-0.0642732	0.586906	0.547654	K20180//vacuolar protein sorting-associated protein 16+ko04138//Autophagy - yeast	XP_712236.2|0.0e+00|tethering complex subunit [Candida albicans SC5314]	GO:0050794//regulation of cellular process;GO:0045184//establishment of protein localization;GO:0016197//endosomal transport;GO:0035542//regulation of SNARE complex assembly;GO:0006996//organelle organization;GO:0065007//biological regulation;GO:0006810//transport;GO:0009607//response to biotic stimulus;GO:0009987//cellular process;GO:0042886//amide transport;GO:0060627//regulation of vesicle-med…
3647650	TOM22	XM_705653.1	Known_gene	1	571203	571655	NC_032095.1	+	453	453	136.37	103.53	256.75	130.96	127.62	166.99	165.55	141.856	0.197609	0.774512	0.584204	0.0584001	0.543481	0.512448	1.00851	5.93976e-42	1.76864e-42	-0.689713	2.67169e-12	1.18792e-12	K17769//mitochondrial import receptor subunit TOM22	XP_710745.1|1.6e-76|Tom22p [Candida albicans SC5314]	GO:0065002//intracellular protein transmembrane transport;GO:0090151//establishment of protein localization to mitochondrial membrane;GO:0009987//cellular process;GO:0072657//protein localization to membrane;GO:0015833//peptide transport;GO:0007008//outer mitochondrial membrane organization;GO:0006839//mitochondrial transport;GO:0071840//cellular component organization or biogenesis;GO:0034613//c…
3639331	RIC1	XM_713905.2	Known_gene	1	119767	122808	NC_032089.1	+	3042	3042	0.39	0.68	1.89	1.4	0.78	0.24	0.986	0.806	0.165549	0.904356	0.792949	-1.84388	2.06795e-06	1.33212e-06	1.27684	2.9505e-05	2.04042e-05	1.5025	0.00588016	0.00420534	K20476//RAB6A-GEF complex partner protein 1	XP_718998.2|0.0e+00|Ric1p [Candida albicans SC5314]	GO:0033036//macromolecule localization;GO:0046907//intracellular transport;GO:0009987//cellular process;GO:0006886//intracellular protein transport;GO:0015031//protein transport;GO:0006810//transport;GO:0070727//cellular macromolecule localization;GO:0071705//nitrogen compound transport;GO:0051641//cellular localization;GO:0016197//endosomal transport;GO:0015833//peptide transport;GO:0045184//est…
3644022	EXO84	XM_709248.2	Known_gene	1	245451	247826	NC_032094.1	+	2376	2376	37.72	37.91	27.92	73.5	53.9	49.82	34.516	59.073	-0.708299	0.156429	0.0395303	-0.962415	3.01212e-78	6.94018e-79	-0.948986	8.56744e-54	2.14186e-54	-0.394147	2.80705e-11	1.29527e-11	K19986//exocyst complex component 8	XP_714341.2|0.0e+00|exocyst subunit [Candida albicans SC5314]	GO:0071702//organic substance transport;GO:0051234//establishment of localization;GO:0006887//exocytosis;GO:0015031//protein transport;GO:0032940//secretion by cell;GO:0046903//secretion;GO:0006810//transport;GO:0015833//peptide transport;GO:0045184//establishment of protein localization;GO:0098876//vesicle-mediated transport to the plasma membrane;GO:0071705//nitrogen compound transport;GO:00081…
3640397	3640397	XM_712863.1	Known_gene	1	200121	201206	NC_032096.1	+	1086	1086	45.64	25.63	34.03	24.44	31.21	53.9	35.1	36.516	-0.0299677	0.974861	0.940841	0.901055	1.82786e-19	8.34962e-20	0.124799	0.214361	0.191665	-1.07245	3.47732e-28	1.0401e-28	NA	XP_717956.1|9.5e-200|hypothetical protein CAALFM_CR00880WA [Candida albicans SC5314]	NA
3642775	SDH12	XM_710435.2	Known_gene	1	1478187	1480112	NC_032092.1	-	1926	1926	131.67	105.11	398.23	289.8	282.51	163.82	211.67	245.376	-0.253922	0.769377	0.577129	-1.13813	0	0	0.4953	3.64849e-103	5.7518e-104	-0.640212	1.78154e-65	3.28108e-66	K00234//succinate dehydrogenase (ubiquinone) flavoprotein subunit [EC:1.3.5.1]+ko00020//Citrate cycle (TCA cycle)+ko01100//Metabolic pathways+ko01130//Biosynthesis of antibiotics+ko00190//Oxidative phosphorylation+ko01110//Biosynthesis of secondary metabolites+ko01200//Carbon metabolism	EMG47017.1|0.0e+00|Flavoprotein subunit of succinate dehydrogenase, putative [Candida maltosa Xu316]	GO:0015980//energy derivation by oxidation of organic compounds;GO:0055114//oxidation-reduction process;GO:0006091//generation of precursor metabolites and energy;GO:0044237//cellular metabolic process;GO:0044238//primary metabolic process;GO:0009987//cellular process;GO:0009060//aerobic respiration;GO:0022900//electron transport chain;GO:0006099//tricarboxylic acid cycle;GO:0008152//metabolic pr…
3642976	3642976	XM_710269.2	Known_gene	1	564861	568430	NC_032090.1	-	3570	3570	16.76	16.13	7.36	6.57	7.74	9.48	13.416	7.93	0.737706	0.243688	0.0789507	1.35106	5.40056e-48	1.61329e-48	-0.0726278	0.55369	0.526412	0.766787	3.59718e-19	1.31774e-19	K02948//small subunit ribosomal protein S11+ko03010//Ribosome	XP_715362.2|0.0e+00|hypothetical protein CAALFM_C202840CA [Candida albicans SC5314]	GO:0046907//intracellular transport;GO:0098876//vesicle-mediated transport to the plasma membrane;GO:0051179//localization;GO:0051641//cellular localization;GO:0016482//cytosolic transport;GO:0016197//endosomal transport;GO:0009987//cellular process;GO:0051234//establishment of localization;GO:0016192//vesicle-mediated transport;GO:0051649//establishment of localization in cell;GO:0006810//transp…
3640535	SWD1	XM_712670.2	Known_gene	1	116945	118288	NC_032091.1	-	1344	1344	47.78	48.9	29.53	31.47	29.32	48.03	42.07	36.273	0.241116	0.732187	0.529466	0.60243	2.48261e-13	1.30034e-13	0.0102963	0.873292	0.860604	0.0258987	0.568102	0.527912	K14961//COMPASS component SWD1	XP_717763.1|2.2e-262|COMPASS subunit protein [Candida albicans SC5314]	GO:1990234//transferase complex;GO:0005654//nucleoplasm;GO:0048188//Set1C/COMPASS complex;GO:1902494//catalytic complex;GO:0005634//nucleus;GO:0032991//protein-containing complex;GO:0031974//membrane-enclosed lumen;GO:0043226//organelle;GO:0035097//histone methyltransferase complex;GO:0043231//intracellular membrane-bounded organelle;GO:0070013//intracellular organelle lumen;GO:0043233//organelle…
3647732	CKS1	XM_705571.2	Known_gene	1	909565	909873	NC_032093.1	-	309	309	144.33	150.93	270.33	246.84	361.41	387.63	188.53	331.96	-0.744868	0.137883	0.0324565	-0.774205	1.02248e-14	5.14492e-15	-0.418915	2.76569e-06	1.80916e-06	-1.3608	1.91651e-45	4.4346e-46	K02219//cyclin-dependent kinase regulatory subunit CKS1+ko04111//Cell cycle - yeast	XP_710663.1|5.3e-55|cyclin-dependent protein kinase regulatory subunit [Candida albicans SC5314]	GO:0010564//regulation of cell cycle process;GO:0051247//positive regulation of protein metabolic process;GO:0042327//positive regulation of phosphorylation;GO:0065009//regulation of molecular function;GO:0001934//positive regulation of protein phosphorylation;GO:0010604//positive regulation of macromolecule metabolic process;GO:0045787//positive regulation of cell cycle;GO:0042325//regulation of…
3635799	3635799	XM_717413.1	Known_gene	1	270227	270661	NC_032090.1	+	435	435	NA	NA	NA	NA	NA	NA	NA	NA	NA	NA	NA	NA	NA	NA	NA	NA	NA	NA	NA	NA	K03142//transcription initiation factor TFIIH subunit 2+ko03420//Nucleotide excision repair+ko03022//Basal transcription factors	XP_722506.1|2.0e-76|hypothetical protein CAALFM_C201500WA [Candida albicans SC5314]	NA
3647252	SPB4	XM_706266.2	Known_gene	1	355185	357080	NC_032093.1	-	1896	1896	34.17	52.47	43.67	65.84	41.02	72.96	43.436	59.94	-0.42017	0.465144	0.231062	-0.946234	5.94464e-54	1.67728e-54	0.090315	0.169098	0.149556	-0.475613	1.61383e-17	6.1912e-18	K14809//ATP-dependent RNA helicase DDX55/SPB4 [EC:3.6.4.13]	XP_711358.2|0.0e+00|putative ATP-dependent RNA helicase [Candida albicans SC5314]	GO:0006396//RNA processing;GO:0046483//heterocycle metabolic process;GO:0022613//ribonucleoprotein complex biogenesis;GO:0006364//rRNA processing;GO:0006807//nitrogen compound metabolic process;GO:0006725//cellular aromatic compound metabolic process;GO:0016072//rRNA metabolic process;GO:0008152//metabolic process;GO:0043170//macromolecule metabolic process;GO:0034641//cellular nitrogen compound …
30515354	STE18	XM_019475486.1	Known_gene	1	373998	374338	NC_032095.1	-	341	273	4.55	4.67	1.82	1.65	1.7	3.15	3.68	2.166	0.549825	0.676899	0.453573	1.4634	0.150365	0.130323	0.0984037	0.895806	0.885932	0.568071	0.37006	0.330884	K07973//guanine nucleotide-binding protein subunit gamma, other+ko04011//MAPK signaling pathway - yeast	XP_019331031.1|8.3e-44|Ste18p [Candida albicans SC5314]	GO:0031136//positive regulation of conjugation;GO:2000243//positive regulation of reproductive process;GO:0050789//regulation of biological process;GO:0048518//positive regulation of biological process;GO:0009987//cellular process;GO:0046999//regulation of conjugation;GO:0023052//signaling;GO:0050896//response to stimulus;GO:0048522//positive regulation of cellular process;GO:0051716//cellular re…
3634933	3634933	XM_718320.2	Known_gene	1	1895260	1895835	NC_032089.1	-	576	576	119.93	104.03	81.17	89.73	108.52	130.92	101.71	109.723	-0.0573654	0.94066	0.870018	0.41853	7.73924e-07	4.8934e-07	-0.418942	9.88675e-06	6.67042e-06	-0.331686	0.00056817	0.00037111	K19932//neuronal calcium sensor 1	XP_723413.2|2.7e-105|frequenin [Candida albicans SC5314]	GO:0005488//binding;GO:0043167//ion binding;GO:0046872//metal ion binding;GO:0043169//cation binding;GO:0005509//calcium ion binding;
3640189	3640189	XM_713053.1	Known_gene	1	262217	263083	NC_032089.1	-	867	867	27.77	18.73	34.1	34.57	29.21	34.41	26.866	32.73	-0.272348	0.641273	0.411858	-0.315993	0.00903852	0.0069711	0.223309	0.0572721	0.0483484	-0.877477	1.68698e-10	7.96856e-11	NA	XP_718146.1|5.1e-164|hypothetical protein CAALFM_C101340CA [Candida albicans SC5314]	GO:0016020//membrane;GO:0110165//cellular anatomical entity;GO:0031224//intrinsic component of membrane;GO:0016021//integral component of membrane;
3641344	IFA21	XM_711868.2	Known_gene	1	687921	690194	NC_032095.1	+	2274	2274	2.75	3.12	13.95	5.11	2.7	2.78	6.606	3.53	0.698744	0.418103	0.19433	-0.893892	8.40209e-06	5.55168e-06	2.36923	2.22875e-52	5.68354e-53	0.166461	0.464895	0.424116	K11801//WD repeat-containing protein 23	XP_716961.2|0.0e+00|Ifa21p [Candida albicans SC5314]	NA
3639525	3639525	XM_713715.2	Known_gene	1	1473495	1474850	NC_032089.1	-	1356	1356	15.25	13.79	19.54	7.97	8.66	9.6	16.193	8.743	0.844928	0.0576493	0.00850295	0.936158	1.21354e-09	6.94962e-10	1.17399	1.88042e-16	8.9436e-17	0.522516	0.000414378	0.000267664	NA	XP_718808.2|8.1e-257|hypothetical protein CAALFM_C106920CA [Candida albicans SC5314]	GO:0031224//intrinsic component of membrane;GO:0016020//membrane;GO:0016021//integral component of membrane;GO:0110165//cellular anatomical entity;
3639887	3639887	XM_713400.1	Known_gene	1	1211015	1211707	NC_032089.1	-	693	693	39.61	28.09	34.05	28.73	32.16	47.45	33.916	36.113	-0.0604747	0.93847	0.865928	0.463307	0.000477805	0.000339632	0.0823874	0.495092	0.467642	-0.756351	1.68727e-08	8.64472e-09	NA	XP_718493.1|1.4e-127|hypothetical protein CAALFM_C105800CA [Candida albicans SC5314]	GO:0060255//regulation of macromolecule metabolic process;GO:0044786//cell cycle DNA replication;GO:0043170//macromolecule metabolic process;GO:0008152//metabolic process;GO:0019222//regulation of metabolic process;GO:0006260//DNA replication;GO:0044237//cellular metabolic process;GO:0050789//regulation of biological process;GO:0006259//DNA metabolic process;GO:1901360//organic cyclic compound me…
3644769	PIL1	XM_708495.2	Known_gene	1	973480	974406	NC_032089.1	+	927	927	117.15	93.04	465.16	478.95	341.97	264.39	225.116	361.77	-0.668839	0.391808	0.174869	-2.03152	0	0	0.443857	3.74691e-45	1.05687e-45	-1.50674	9.07711e-189	8.25192e-190	K12666//oligosaccharyltransferase complex subunit alpha (ribophorin I)+ko04141//Protein processing in endoplasmic reticulum+ko01100//Metabolic pathways+ko00513//Various types of N-glycan biosynthesis+ko00510//N-Glycan biosynthesis;K06126//ubiquinone biosynthesis monooxygenase Coq6 [EC:1.14.13.-]+ko00130//Ubiquinone and other terpenoid-quinone biosynthesis+ko01100//Metabolic pathways+ko01110//Bios…	XP_713588.2|3.5e-171|lipid-binding protein [Candida albicans SC5314]	GO:0051248//negative regulation of protein metabolic process;GO:0051171//regulation of nitrogen compound metabolic process;GO:0006897//endocytosis;GO:0009892//negative regulation of metabolic process;GO:0045859//regulation of protein kinase activity;GO:0016043//cellular component organization;GO:0043549//regulation of kinase activity;GO:0051234//establishment of localization;GO:0050789//regulatio…
3638904	3638904	XM_714466.2	Known_gene	1	26026	27414	NC_032090.1	-	1389	1389	66.63	51.91	95.49	108.48	75.18	72.53	71.343	85.396	-0.259918	0.662646	0.436898	-0.703185	2.03217e-38	6.81248e-39	0.345001	3.00269e-10	1.70844e-10	-0.482565	7.89151e-13	3.44516e-13	NA	XP_719559.1|1.4e-259|peroxisome biogenesis protein [Candida albicans SC5314]	GO:0016043//cellular component organization;GO:0009987//cellular process;GO:0007031//peroxisome organization;GO:0006996//organelle organization;GO:0071840//cellular component organization or biogenesis;GO:0043231//intracellular membrane-bounded organelle;GO:0016020//membrane;GO:0098805//whole membrane;GO:0005779//integral component of peroxisomal membrane;GO:0043229//intracellular organelle;GO:00…
3643945	RAP1	XM_709325.2	Known_gene	1	2066873	2068165	NC_032090.1	+	1293	1293	61.28	51.31	24.32	25.79	48.07	36.84	45.636	36.9	0.321125	0.687469	0.468091	1.2486	8.09335e-52	2.32284e-52	-0.982994	9.8427e-27	3.81676e-27	0.477967	4.31388e-10	2.06814e-10	K09426//Myb-like DNA-binding protein RAP1	XP_714418.2|2.2e-251|DNA-binding transcription factor [Candida albicans SC5314]	GO:0050789//regulation of biological process;GO:2000220//regulation of pseudohyphal growth;GO:0009987//cellular process;GO:0050794//regulation of cellular process;GO:1900428//regulation of filamentous growth of a population of unicellular organisms;GO:0060249//anatomical structure homeostasis;GO:0051276//chromosome organization;GO:0042592//homeostatic process;GO:0071840//cellular component organi…
3641233	3641233	XM_712078.1	Known_gene	1	2225780	2226865	NC_032090.1	-	1086	1086	96.79	104.18	180.26	91.75	67.68	86.31	127.076	81.913	0.587806	0.225227	0.0695582	0.0771498	0.219568	0.194089	1.41328	2.22693e-145	2.65908e-146	0.271479	7.56132e-07	4.1701e-07	K01599//uroporphyrinogen decarboxylase [EC:4.1.1.37]+ko00860//Porphyrin and chlorophyll metabolism+ko01100//Metabolic pathways+ko01110//Biosynthesis of secondary metabolites	XP_717171.1|1.3e-212|uroporphyrinogen decarboxylase [Candida albicans SC5314]	GO:0018130//heterocycle biosynthetic process;GO:0006778//porphyrin-containing compound metabolic process;GO:0071704//organic substance metabolic process;GO:0006782//protoporphyrinogen IX biosynthetic process;GO:0044271//cellular nitrogen compound biosynthetic process;GO:1901362//organic cyclic compound biosynthetic process;GO:0044237//cellular metabolic process;GO:1901360//organic cyclic compound…
3638371	SAP8	XM_714848.2	Known_gene	1	548135	549352	NC_032091.1	-	1218	1218	20.36	12.86	5.55	7.44	6.58	11.3	12.923	8.44	0.596963	0.463005	0.229537	1.45236	3.77717e-21	1.66785e-21	-0.2456	0.311431	0.28475	0.186568	0.203608	0.174526	K06005//candidapepsin [EC:3.4.23.24]	XP_719941.1|5.6e-225|Sap8p [Candida albicans SC5314]	GO:0071704//organic substance metabolic process;GO:0030163//protein catabolic process;GO:0006508//proteolysis;GO:0044238//primary metabolic process;GO:0009405//pathogenesis;GO:0044419//interspecies interaction between organisms;GO:0006807//nitrogen compound metabolic process;GO:0009056//catabolic process;GO:0043170//macromolecule metabolic process;GO:0019538//protein metabolic process;GO:0009987/…
3636511	3636511	XM_716758.2	Known_gene	1	996127	996717	NC_032093.1	-	591	591	12.47	7.97	22.72	10.74	22.67	11.96	14.386	15.123	-0.0920202	0.931561	0.847574	0.215467	0.414884	0.381746	0.00317844	0.915153	0.908276	-0.585566	0.0571515	0.045435	K12189//ESCRT-II complex subunit VPS25+ko04144//Endocytosis	XP_721851.1|4.6e-108|ESCRT-II subunit protein [Candida albicans SC5314]	GO:0043328//protein transport to vacuole involved in ubiquitin-dependent protein catabolic process via the multivesicular body sorting pathway;GO:0019941//modification-dependent protein catabolic process;GO:1901575//organic substance catabolic process;GO:0006807//nitrogen compound metabolic process;GO:0033036//macromolecule localization;GO:0044257//cellular protein catabolic process;GO:0051649//e…
3644762	3644762	XM_708500.2	Known_gene	1	954196	957687	NC_032089.1	-	3492	3492	46.98	49.05	27.42	36.96	38.85	56.89	41.15	44.233	-0.0590948	0.943214	0.876638	0.346082	3.17038e-13	1.6627e-13	-0.502686	4.93203e-20	2.1695e-20	-0.213922	1.46688e-06	8.22054e-07	K01530//phospholipid-translocating ATPase [EC:7.6.2.1]	XP_713593.2|0.0e+00|putative aminophospholipid-translocating P4-type ATPase [Candida albicans SC5314]	GO:0016192//vesicle-mediated transport;GO:0015711//organic anion transport;GO:0015914//phospholipid transport;GO:0016043//cellular component organization;GO:0065008//regulation of biological quality;GO:0006810//transport;GO:0015748//organophosphate ester transport;GO:0097035//regulation of membrane lipid distribution;GO:0006811//ion transport;GO:0006820//anion transport;GO:0006869//lipid transpor…
3643469	BUD14	XM_709821.2	Known_gene	1	1083758	1086160	NC_032090.1	+	2403	2403	111.56	141.7	93.93	367.1	322.62	246.14	115.73	311.953	-1.32841	0.00239004	0.000129871	-1.71835	0	0	-1.78018	0	0	-0.796639	5.99738e-183	5.58318e-184	K02309//regulatory subunit for Cdc7p protein kinase+ko04113//Meiosis - yeast+ko04111//Cell cycle - yeast;K06062//histone acetyltransferase [EC:2.3.1.48]	XP_714914.2|0.0e+00|protein phosphatase regulator [Candida albicans SC5314]	NA
3639539	CYK3	XM_713738.2	Known_gene	1	1431951	1432876	NC_032089.1	+	926	926	6.44	3.65	5.36	8.08	6.54	6.04	5.15	6.886	-0.369475	0.624407	0.393022	-0.327295	0.185106	0.162355	-0.287058	0.322422	0.296146	-0.726652	0.0227259	0.0172153	K20520//drebrin-like protein;K20522//LAS seventeen-binding protein 1/2;K04705//signal transducing adaptor molecule+ko04144//Endocytosis;K20521//myosin tail region-interacting protein MTI1	KGQ99046.1|1.8e-175|hypothetical protein MEU_00646, partial [Candida albicans P37005]	GO:0030427//site of polarized growth;GO:0110165//cellular anatomical entity;GO:0005933//cellular bud;GO:0005935//cellular bud neck;
30515029	30515029	XM_019475130.1	Known_gene	1	1762963	1763349	NC_032089.1	-	387	387	231.33	220.26	375.93	406.85	320.81	314.58	275.84	347.413	-0.304533	0.567556	0.326901	-0.814545	2.10792e-36	7.25346e-37	0.228745	3.82111e-05	2.65844e-05	-0.514219	2.16137e-09	1.06271e-09	K11353//NADH dehydrogenase (ubiquinone) 1 alpha subcomplex subunit 13+ko01100//Metabolic pathways+ko00190//Oxidative phosphorylation	XP_019330675.1|2.5e-70|hypothetical protein CAALFM_C108080CA [Candida albicans SC5314]	GO:0016021//integral component of membrane;GO:0110165//cellular anatomical entity;GO:0031224//intrinsic component of membrane;GO:0016020//membrane;GO:0016651//oxidoreductase activity, acting on NAD(P)H;GO:0016655//oxidoreductase activity, acting on NAD(P)H, quinone or similar compound as acceptor;GO:0050136//NADH dehydrogenase (quinone) activity;GO:0008137//NADH dehydrogenase (ubiquinone) activit…
3638416	3638416	XM_714875.2	Known_gene	1	603064	603378	NC_032091.1	+	315	315	34.11	31.25	57.02	22.8	35.51	53.42	40.793	37.243	0.143638	0.878322	0.744387	0.581161	0.0281495	0.0225828	0.683243	0.000521907	0.000385416	-0.773524	0.00279165	0.00193084	NA	XP_719968.2|9.8e-57|hypothetical protein CAALFM_C302790WA [Candida albicans SC5314]	NA
3643784	IPK2	XM_709458.2	Known_gene	1	1987847	1988899	NC_032090.1	-	1053	1053	33.08	21.53	50.69	44.51	65.1	70.66	35.1	60.09	-0.744721	0.17108	0.0453117	-0.42817	7.72484e-06	5.08996e-06	-0.360956	1.00885e-05	6.80988e-06	-1.71455	6.44054e-72	1.11365e-72	K00915//inositol-polyphosphate multikinase [EC:2.7.1.140 2.7.1.151]+ko01100//Metabolic pathways+ko04138//Autophagy - yeast+ko04070//Phosphatidylinositol signaling system+ko00562//Inositol phosphate metabolism	XP_714551.1|2.5e-197|inositol polyphosphate multikinase [Candida albicans SC5314]	GO:1901576//organic substance biosynthetic process;GO:0044281//small molecule metabolic process;GO:0019751//polyol metabolic process;GO:0046165//alcohol biosynthetic process;GO:0019637//organophosphate metabolic process;GO:0044283//small molecule biosynthetic process;GO:0009987//cellular process;GO:1901615//organic hydroxy compound metabolic process;GO:0006796//phosphate-containing compound metab…
3638485	3638485	XM_714752.1	Known_gene	1	1699250	1700236	NC_032091.1	+	987	987	105.14	121.01	243.59	208.97	244.21	217.51	156.58	223.563	-0.513284	0.352257	0.143451	-0.990984	5.36059e-88	1.15524e-88	-0.00366737	0.902469	0.893426	-0.845955	1.57575e-65	2.89678e-66	K03247//translation initiation factor 3 subunit H+ko03013//RNA transport	XP_719845.1|3.0e-184|hypothetical protein CAALFM_C307420WA [Candida albicans SC5314]	GO:0009059//macromolecule biosynthetic process;GO:0010467//gene expression;GO:0002181//cytoplasmic translation;GO:0071826//ribonucleoprotein complex subunit organization;GO:0008152//metabolic process;GO:0043933//protein-containing complex subunit organization;GO:0044260//cellular macromolecule metabolic process;GO:0044271//cellular nitrogen compound biosynthetic process;GO:0006412//translation;GO…
3645033	SUB2	XM_019475351.1	Known_gene	1	33383	34763	NC_032092.1	-	1381	1302	65.02	95.05	144.05	70.67	65.76	80.96	101.373	72.463	0.442231	0.410832	0.188899	-0.120214	0.0645571	0.0537796	1.13129	2.97844e-101	4.77008e-102	0.231477	7.99167e-06	4.64782e-06	K12812//ATP-dependent RNA helicase UAP56/SUB2 [EC:3.6.4.13]+ko03040//Spliceosome+ko03013//RNA transport+ko03015//mRNA surveillance pathway	SGZ49365.1|1.6e-233|CIC11C00000000937 [[Candida] intermedia]	GO:0031327//negative regulation of cellular biosynthetic process;GO:0000398//mRNA splicing, via spliceosome;GO:0006807//nitrogen compound metabolic process;GO:0006886//intracellular protein transport;GO:0010468//regulation of gene expression;GO:1901360//organic cyclic compound metabolic process;GO:0051179//localization;GO:0050896//response to stimulus;GO:0032774//RNA biosynthetic process;GO:19035…
3647399	3647399	XM_705916.2	Known_gene	1	826496	828007	NC_032091.1	-	1512	1512	10.32	17.3	27.61	12.21	15.7	14.34	18.41	14.083	0.332085	0.623628	0.391789	-0.24262	0.1033	0.0878186	0.814426	1.68331e-14	8.44464e-15	0.270727	0.0209206	0.0157915	NA	XP_711008.2|1.2e-296|hypothetical protein CAALFM_C303980CA [Candida albicans SC5314]	GO:0016020//membrane;GO:0110165//cellular anatomical entity;GO:0016021//integral component of membrane;GO:0031224//intrinsic component of membrane;
3643877	RPT6	XM_709347.2	Known_gene	1	1784325	1785530	NC_032090.1	+	1206	1206	172.45	161.64	192.42	158.31	129.67	175.06	175.503	154.346	0.189415	0.70797	0.496471	0.123426	0.00440931	0.00332544	0.569414	1.81098e-39	5.57992e-40	-0.115065	0.033518	0.02592	K03066//26S proteasome regulatory subunit T6+ko03050//Proteasome	XP_714440.2|1.6e-224|proteasome regulatory particle base subunit [Candida albicans SC5314]	GO:0009893//positive regulation of metabolic process;GO:0050789//regulation of biological process;GO:0045944//positive regulation of transcription by RNA polymerase II;GO:0071704//organic substance metabolic process;GO:0060261//positive regulation of transcription initiation from RNA polymerase II promoter;GO:0010468//regulation of gene expression;GO:0051252//regulation of RNA metabolic process;G…
3647071	COX15	XM_706236.2	Known_gene	1	124508	125947	NC_032094.1	-	1440	1440	178.67	115.39	311.6	90.71	131.72	161.9	201.886	128.11	0.580582	0.340835	0.135645	0.977964	5.33048e-113	1.00504e-113	1.24222	1.70938e-281	1.13045e-282	-0.488585	8.99071e-29	2.6605e-29	K02259//cytochrome c oxidase assembly protein subunit 15+ko00860//Porphyrin and chlorophyll metabolism+ko01100//Metabolic pathways+ko00190//Oxidative phosphorylation+ko01110//Biosynthesis of secondary metabolites	XP_711328.2|8.2e-276|Cox15p [Candida albicans SC5314]	GO:0042440//pigment metabolic process;GO:0006778//porphyrin-containing compound metabolic process;GO:0006783//heme biosynthetic process;GO:1901564//organonitrogen compound metabolic process;GO:1901576//organic substance biosynthetic process;GO:0006779//porphyrin-containing compound biosynthetic process;GO:1901566//organonitrogen compound biosynthetic process;GO:0033014//tetrapyrrole biosynthetic …
3642825	3642825	XM_710462.1	Known_gene	1	1412344	1413132	NC_032092.1	-	789	789	1.52	1.31	1.75	9.01	6.12	3.71	1.526	6.28	-1.73246	0.0136828	0.00118927	-2.56746	2.11347e-12	1.13035e-12	-1.80618	8.29463e-06	5.57408e-06	-1.50185	0.00285015	0.0019737	K18337//L-rhamnose 1-dehydrogenase [EC:1.1.1.378 1.1.1.377 1.1.1.173]+ko00051//Fructose and mannose metabolism;K17742//sorbose reductase [EC:1.1.1.289]+ko00051//Fructose and mannose metabolism	XP_715555.1|5.4e-144|hypothetical protein CAALFM_C406360CA [Candida albicans SC5314]	GO:0044281//small molecule metabolic process;GO:1901615//organic hydroxy compound metabolic process;GO:0009987//cellular process;GO:0071704//organic substance metabolic process;GO:0044255//cellular lipid metabolic process;GO:0044237//cellular metabolic process;GO:0006721//terpenoid metabolic process;GO:0034308//primary alcohol metabolic process;GO:0006720//isoprenoid metabolic process;GO:0055114/…
3643135	3643135	XM_710122.1	Known_gene	1	887242	888585	NC_032095.1	-	1344	1344	358.29	599.3	387.15	73.34	185.35	96.94	448.246	118.543	1.76569	0.000843422	3.39479e-05	2.28846	0	0	1.06264	1.38496e-252	1.0038e-253	2.62811	0	0	K13535//cardiolipin-specific phospholipase [EC:3.1.1.-]+ko00564//Glycerophospholipid metabolism	XP_715215.1|2.0e-260|hypothetical protein CAALFM_C704090CA [Candida albicans SC5314]	GO:0042592//homeostatic process;GO:0071704//organic substance metabolic process;GO:0008152//metabolic process;GO:0019637//organophosphate metabolic process;GO:0046486//glycerolipid metabolic process;GO:0044255//cellular lipid metabolic process;GO:0009987//cellular process;GO:0006644//phospholipid metabolic process;GO:0006629//lipid metabolic process;GO:0006793//phosphorus metabolic process;GO:006…
3640205	ZCF17	XM_713035.2	Known_gene	1	236084	238300	NC_032089.1	-	2217	2217	69.67	87.89	42.15	77.91	126.02	99.47	66.57	101.133	-0.5234	0.413231	0.190621	-0.161271	0.000446092	0.000316492	-1.58005	8.89382e-255	6.34212e-256	-0.178562	4.91849e-05	2.99192e-05	K21632//white-opaque regulator 2	XP_718128.2|0.0e+00|Zcf17p [Candida albicans SC5314]	GO:0019222//regulation of metabolic process;GO:0070784//regulation of growth of unicellular organism as a thread of attached cells;GO:0051171//regulation of nitrogen compound metabolic process;GO:0010570//regulation of filamentous growth;GO:1903508//positive regulation of nucleic acid-templated transcription;GO:0006355//regulation of transcription, DNA-templated;GO:0010604//positive regulation of…
3646398	FDH1	XM_706891.1	Known_gene	1	1117036	1118175	NC_032096.1	-	1140	1140	104.29	67.91	271.09	290.51	95.55	173.83	147.763	186.63	-0.341867	0.696007	0.480728	-1.47799	2.05032e-268	2.14576e-269	1.50444	1.12224e-252	8.11506e-254	-1.35598	1.77247e-135	2.02534e-136	K00122//formate dehydrogenase [EC:1.17.1.9]+ko01100//Metabolic pathways+ko00680//Methane metabolism+ko01200//Carbon metabolism+ko00630//Glyoxylate and dicarboxylate metabolism	XP_711984.1|3.1e-217|formate dehydrogenase (NAD+) [Candida albicans SC5314]	GO:0071704//organic substance metabolic process;GO:0009069//serine family amino acid metabolic process;GO:0009063//cellular amino acid catabolic process;GO:1901575//organic substance catabolic process;GO:1901606//alpha-amino acid catabolic process;GO:1901565//organonitrogen compound catabolic process;GO:0009056//catabolic process;GO:0006520//cellular amino acid metabolic process;GO:0044281//small…
3647873	3647873	XM_705420.2	Known_gene	1	15563	15979	NC_032093.1	-	417	417	22.92	37.3	61.12	29.06	30.08	30.57	40.446	29.903	0.403538	0.562952	0.322758	-0.342428	0.118397	0.101287	1.02284	3.90182e-10	2.22784e-10	0.287059	0.0485107	0.0381988	NA	XP_710512.2|1.4e-74|hypothetical protein CAALFM_C500140CA [Candida albicans SC5314]	GO:0031224//intrinsic component of membrane;GO:0110165//cellular anatomical entity;GO:0016020//membrane;GO:0016021//integral component of membrane;
3636823	3636823	XM_716365.1	Known_gene	1	562357	562659	NC_032089.1	-	303	303	1.87	9.62	8.01	0.91	8.37	3.47	6.5	4.25	0.457153	0.727208	0.522132	1.0391	0.459384	0.425846	-0.0634254	0.980804	0.979494	1.4711	0.00594119	0.00424998	NA	XP_721458.1|4.7e-48|hypothetical protein CAALFM_C102690CA [Candida albicans SC5314]	NA
3636982	3636982	XM_716300.1	Known_gene	1	359156	360895	NC_032095.1	+	1740	1740	35.06	27.13	24.73	28.43	24.76	82.03	28.973	45.073	-0.53549	0.479555	0.243649	0.302412	0.000157102	0.00010933	-0.00174907	0.974557	0.973092	-1.59626	3.16768e-132	3.6888e-133	K01426//amidase [EC:3.5.1.4]+ko00380//Tryptophan metabolism+ko00330//Arginine and proline metabolism+ko00360//Phenylalanine metabolism	XP_721393.1|0.0e+00|hypothetical protein CAALFM_C701670WA [Candida albicans SC5314]	NA
3646722	3646722	XM_706588.2	Known_gene	1	738908	739837	NC_032095.1	-	930	930	30.42	20.11	28.08	9.8	12.64	16.95	26.203	13.13	0.946274	0.066388	0.0105102	1.63417	4.56551e-27	1.82941e-27	1.15155	4.635e-15	2.28112e-15	0.246628	0.0707072	0.0566988	K19654//2-dehydropantolactone reductase [EC:1.1.1.358];K20032//palmitoyltransferase ZDHHC13/17 [EC:2.3.1.225]	XP_711680.2|3.4e-174|aldo-keto reductase superfamily protein [Candida albicans SC5314]	GO:0110165//cellular anatomical entity;GO:0005829//cytosol;GO:0005622//intracellular;GO:0005737//cytoplasm;GO:0016616//oxidoreductase activity, acting on the CH-OH group of donors, NAD or NADP as acceptor;GO:0016614//oxidoreductase activity, acting on CH-OH group of donors;GO:0016491//oxidoreductase activity;GO:0004032//alditol:NADP+ 1-oxidoreductase activity;GO:0003824//catalytic activity;GO:000…
3647898	3647898	XM_705407.1	Known_gene	1	11580	11948	NC_032094.1	+	369	369	83	135.55	112.69	69.14	77.12	91.95	110.413	79.403	0.505014	0.376572	0.161817	0.263591	0.0623717	0.0518232	0.547183	4.2246e-06	2.78818e-06	0.559904	1.88781e-09	9.2503e-10	K19950//protein transport protein SEC9	XP_710499.1|6.7e-65|hypothetical protein CAALFM_C600090WA [Candida albicans SC5314]	GO:0006996//organelle organization;GO:0044281//small molecule metabolic process;GO:0071704//organic substance metabolic process;GO:0009058//biosynthetic process;GO:0043933//protein-containing complex subunit organization;GO:0019318//hexose metabolic process;GO:0034553//mitochondrial respiratory chain complex II assembly;GO:0006094//gluconeogenesis;GO:0043648//dicarboxylic acid metabolic process;G…
3641807	LEA1	XM_711475.1	Known_gene	1	1269674	1270375	NC_032092.1	-	702	702	57.85	66.11	76.83	40.38	52.91	84.8	66.93	59.363	0.179151	0.801122	0.622547	0.518676	1.98668e-06	1.2791e-06	0.538129	9.64106e-09	5.79784e-09	-0.359196	0.000343598	0.00022027	K11092//U2 small nuclear ribonucleoprotein A'+ko03040//Spliceosome	XP_716568.1|4.5e-126|U2 snRNP complex subunit [Candida albicans SC5314]	GO:0016071//mRNA metabolic process;GO:0008380//RNA splicing;GO:0000375//RNA splicing, via transesterification reactions;GO:0008152//metabolic process;GO:0006725//cellular aromatic compound metabolic process;GO:0009987//cellular process;GO:0006139//nucleobase-containing compound metabolic process;GO:0000377//RNA splicing, via transesterification reactions with bulged adenosine as nucleophile;GO:00…
3635816	3635816	XM_717523.2	Known_gene	1	501159	502925	NC_032090.1	+	1767	1767	17.31	27.41	10.42	27.96	30.4	23.74	18.38	27.366	-0.483123	0.495243	0.256897	-0.691759	1.82688e-13	9.52904e-14	-1.54472	1.34234e-47	3.6697e-48	0.207382	0.0137859	0.010223	K03132//transcription initiation factor TFIID subunit 7+ko03022//Basal transcription factors	KGQ96926.1|0.0e+00|transcription initiation factor TFIID subunit 7 [Candida albicans P37005]	NA
3634919	3634919	XM_718336.1	Known_gene	1	1922753	1923817	NC_032089.1	+	1065	1065	8.08	17.98	17.41	13.01	7.84	12.1	14.49	10.983	0.372078	0.612038	0.37568	-0.687194	0.000206745	0.000144465	1.15099	2.94389e-11	1.62976e-11	0.571386	0.000114374	7.10728e-05	K12562//amphiphysin+ko04144//Endocytosis	XP_723429.1|1.2e-199|hypothetical protein CAALFM_C108840WA [Candida albicans SC5314]	GO:0051666//actin cortical patch localization;GO:0006810//transport;GO:0016192//vesicle-mediated transport;GO:0051179//localization;GO:0010256//endomembrane system organization;GO:0006897//endocytosis;GO:0009987//cellular process;GO:0007009//plasma membrane organization;GO:0051234//establishment of localization;GO:0061024//membrane organization;GO:0016043//cellular component organization;GO:00718…
3648024	3648024	XM_705281.2	Known_gene	1	1383179	1385761	NC_032090.1	+	2583	2583	47.08	29.1	28.59	17.68	15.97	20.21	34.923	17.953	0.929344	0.0591136	0.00878782	1.413	5.81103e-101	1.15598e-101	0.840146	8.50337e-27	3.28888e-27	0.52595	2.82264e-13	1.21994e-13	K19816//transcription activator MSS11+ko04011//MAPK signaling pathway - yeast	XP_710373.2|0.0e+00|hypothetical protein CAALFM_C206740WA [Candida albicans SC5314]	NA
3647465	3647465	XM_705843.1	Known_gene	1	1776123	1776815	NC_032091.1	-	693	693	0.96	0.14	3.38	0.4	1.07	0.26	1.493	0.576	0.721446	0.573294	0.333293	1.26303	0.231676	0.20549	1.65941	0.0036083	0.00278938	-0.893085	0.737544	0.710154	K03841//fructose-1,6-bisphosphatase I [EC:3.1.3.11]+ko00010//Glycolysis / Gluconeogenesis+ko00030//Pentose phosphate pathway+ko01100//Metabolic pathways+ko01130//Biosynthesis of antibiotics+ko00051//Fructose and mannose metabolism+ko01110//Biosynthesis of secondary metabolites+ko00680//Methane metabolism+ko01200//Carbon metabolism	XP_710935.1|1.8e-127|hypothetical protein CAALFM_C307840CA [Candida albicans SC5314]	GO:0006000//fructose metabolic process;GO:1901135//carbohydrate derivative metabolic process;GO:0005986//sucrose biosynthetic process;GO:0019637//organophosphate metabolic process;GO:0006796//phosphate-containing compound metabolic process;GO:0006094//gluconeogenesis;GO:0005984//disaccharide metabolic process;GO:0005975//carbohydrate metabolic process;GO:0009058//biosynthetic process;GO:0044283//…
3641556	3641556	XM_711701.1	Known_gene	1	54415	63318	NC_032093.1	-	8904	8904	17.67	16.84	9.26	11.56	8.32	12.39	14.59	10.756	0.447121	0.482552	0.246377	0.612161	1.35751e-34	4.79402e-35	0.154429	0.0183049	0.0148077	0.442716	6.76044e-19	2.49924e-19	NA	XP_716794.1|0.0e+00|hypothetical protein CAALFM_C500330CA [Candida albicans SC5314]	GO:0006113//fermentation;GO:0044237//cellular metabolic process;GO:0008152//metabolic process;GO:0015980//energy derivation by oxidation of organic compounds;GO:0009987//cellular process;GO:0006091//generation of precursor metabolites and energy;GO:0055114//oxidation-reduction process;GO:0031224//intrinsic component of membrane;GO:0016020//membrane;GO:0016021//integral component of membrane;GO:01…
3644576	3644576	XM_708695.2	Known_gene	1	492588	496217	NC_032089.1	-	3630	3630	4.46	2.82	7.48	2.96	2.42	2.59	4.92	2.656	0.792005	0.174849	0.0469796	0.591447	0.000207367	0.000144969	1.62803	1.32473e-28	4.9401e-29	0.122743	0.527629	0.487288	K20456//oxysterol-binding protein 1;K19983//exocyst complex component 1	XP_713788.2|0.0e+00|hypothetical protein CAALFM_C102370CA [Candida albicans SC5314]	NA
3643742	3643742	XM_709504.2	Known_gene	1	430841	432214	NC_032093.1	-	1374	1374	24.19	16.56	31.04	43.86	30.68	41.35	23.93	38.63	-0.661753	0.17852	0.0486793	-0.858495	2.81254e-22	1.21742e-22	0.0168301	0.817928	0.800854	-1.32018	2.6394e-39	6.65726e-40	K01106//inositol-1,4,5-trisphosphate 5-phosphatase [EC:3.1.3.56]+ko01100//Metabolic pathways+ko04070//Phosphatidylinositol signaling system+ko00562//Inositol phosphate metabolism;K20279//synaptojanin [EC:3.1.3.36]+ko01100//Metabolic pathways+ko04070//Phosphatidylinositol signaling system+ko00562//Inositol phosphate metabolism	XP_714597.2|1.8e-267|phosphoinositide 5-phosphatase [Candida albicans SC5314]	GO:0044281//small molecule metabolic process;GO:0046856//phosphatidylinositol dephosphorylation;GO:0071704//organic substance metabolic process;GO:0046174//polyol catabolic process;GO:0030258//lipid modification;GO:0046838//phosphorylated carbohydrate dephosphorylation;GO:1901616//organic hydroxy compound catabolic process;GO:0019637//organophosphate metabolic process;GO:0008152//metabolic proces…
3643479	ARP3	XM_709785.2	Known_gene	1	1488635	1489894	NC_032090.1	+	1260	1260	24.51	21.43	74.92	33.45	33.7	21.36	40.286	29.503	0.347158	0.665194	0.441285	-0.448636	7.37505e-06	4.85454e-06	1.1526	5.28582e-53	1.33646e-53	0.0047202	0.838959	0.819504	K18584//actin-related protein 3+ko04138//Autophagy - yeast	XP_714878.1|5.8e-241|actin-related protein 3 [Candida albicans SC5314]	GO:0051641//cellular localization;GO:0097435//supramolecular fiber organization;GO:0050794//regulation of cellular process;GO:0042221//response to chemical;GO:1903047//mitotic cell cycle process;GO:1904670//actin filament polymerization involved in mitotic actomyosin contractile ring assembly;GO:0110053//regulation of actin filament organization;GO:0022607//cellular component assembly;GO:0032273/…
3646495	3646495	XM_706792.1	Known_gene	1	1867125	1867568	NC_032089.1	-	444	444	162.33	227.73	392.91	101.66	181.01	202.14	260.99	161.603	0.637732	0.296547	0.10836	0.675178	9.8665e-14	5.10342e-14	1.11813	1.93701e-72	4.01442e-73	0.17197	0.000385839	0.000248192	K17421//large subunit ribosomal protein L40	XP_711885.1|2.0e-79|mitochondrial 54S ribosomal protein YmL28 [Candida albicans SC5314]	GO:0009059//macromolecule biosynthetic process;GO:0006412//translation;GO:0044260//cellular macromolecule metabolic process;GO:0043604//amide biosynthetic process;GO:0043603//cellular amide metabolic process;GO:1901564//organonitrogen compound metabolic process;GO:0019538//protein metabolic process;GO:0034641//cellular nitrogen compound metabolic process;GO:0008152//metabolic process;GO:0009987//…
3637373	PGA16	XM_715879.1	Known_gene	1	789500	789823	NC_032090.1	+	324	324	0	0	0	0	0.41	0	0	0.136	-0.0848889	0.873774	0.736016	NA	NA	NA	-5.35755	0.579597	0.553656	NA	NA	NA	K15165//mediator of RNA polymerase II transcription subunit 13, fungi type;K21641//glucose transport transcription regulator RGT1	XP_720972.1|8.6e-56|Pga16p [Candida albicans SC5314]	GO:0009405//pathogenesis;GO:0044419//interspecies interaction between organisms;GO:0031225//anchored component of membrane;GO:0110165//cellular anatomical entity;GO:0016020//membrane;GO:0071944//cell periphery;GO:0031224//intrinsic component of membrane;GO:0005886//plasma membrane;
3637759	3637759	XM_715445.2	Known_gene	1	489943	490926	NC_032093.1	+	984	984	92.36	71.06	132.35	90.28	64.66	98.53	98.59	84.49	0.204794	0.735491	0.533507	0.0328618	0.639715	0.61165	1.03341	4.19127e-59	9.91822e-60	-0.471525	4.94659e-11	2.295e-11	NA	XP_720538.2|7.3e-183|hypothetical protein CAALFM_C502210WA [Candida albicans SC5314]	GO:0008104//protein localization;GO:0090150//establishment of protein localization to membrane;GO:0010256//endomembrane system organization;GO:0051179//localization;GO:0016043//cellular component organization;GO:0051234//establishment of localization;GO:0007029//endoplasmic reticulum organization;GO:0045184//establishment of protein localization;GO:0034613//cellular protein localization;GO:000998…
3645123	3645123	XM_708154.1	Known_gene	1	708144	709112	NC_032096.1	+	969	969	390.4	309.86	637.45	159.11	324.44	350.33	445.903	277.96	0.614977	0.306626	0.114439	1.29493	3.91982e-245	4.39766e-246	0.97436	3.6747e-249	2.70018e-250	-0.177098	1.79685e-05	1.06917e-05	NA	XP_713247.1|3.3e-188|hypothetical protein CAALFM_CR03120WA [Candida albicans SC5314]	NA
3640988	3640988	XM_712307.2	Known_gene	1	986837	987634	NC_032096.1	-	798	798	18.52	9.97	21.93	15.33	10.29	16.48	16.806	14.033	0.23774	0.752233	0.556755	0.272726	0.122463	0.104951	1.09166	1.56384e-09	9.13024e-10	-0.725051	0.000530774	0.00034606	NA	KHC45758.1|2.5e-149|hypothetical protein MGC_05787 [Candida albicans P37039]	NA
3637809	3637809	XM_715521.2	Known_gene	1	630777	631655	NC_032093.1	+	879	879	176.8	121.59	158.61	133.94	116.22	120.91	152.333	123.69	0.302726	0.553223	0.313773	0.400531	3.54459e-14	1.81384e-14	0.448625	1.00431e-15	4.86052e-16	0.00809101	0.529202	0.489096	K12197//charged multivesicular body protein 1+ko04144//Endocytosis	XP_720614.2|3.5e-160|hypothetical protein CAALFM_C502830WA [Candida albicans SC5314]	GO:0042886//amide transport;GO:0051641//cellular localization;GO:0046907//intracellular transport;GO:0007034//vacuolar transport;GO:0015833//peptide transport;GO:0009987//cellular process;GO:0071985//multivesicular body sorting pathway;GO:0071705//nitrogen compound transport;GO:0051649//establishment of localization in cell;GO:0015031//protein transport;GO:0032509//endosome transport via multives…
3641928	3641928	XM_711347.1	Known_gene	1	1942195	1943244	NC_032096.1	-	1050	1050	639.37	645.16	543.26	59.65	44.94	76.81	609.263	60.466	3.19395	5.20676e-19	5.20069e-22	3.42206	0	0	3.59557	0	0	3.07029	0	0	K05275//pyridoxine 4-dehydrogenase [EC:1.1.1.65]+ko00750//Vitamin B6 metabolism+ko01100//Metabolic pathways	XP_716440.1|7.3e-197|pyridoxine 4-dehydrogenase [Candida albicans SC5314]	GO:0016616//oxidoreductase activity, acting on the CH-OH group of donors, NAD or NADP as acceptor;GO:0016614//oxidoreductase activity, acting on CH-OH group of donors;GO:0003824//catalytic activity;GO:0004033//aldo-keto reductase (NADP) activity;GO:0016491//oxidoreductase activity;
3645134	DPS1-1	XM_708147.1	Known_gene	1	715385	717121	NC_032096.1	+	1737	1737	29.57	30.66	132.86	69.41	54.09	38.5	64.363	54	0.150282	0.887685	0.760894	-1.23101	1.41701e-78	3.25542e-79	1.29647	3.77335e-158	4.22832e-159	-0.328501	5.1829e-05	3.15886e-05	K22503//aspartyl-tRNA synthetase [EC:6.1.1.12]+ko00970//Aminoacyl-tRNA biosynthesis	XP_713240.1|0.0e+00|aspartate--tRNA ligase [Candida albicans SC5314]	GO:0006399//tRNA metabolic process;GO:1901564//organonitrogen compound metabolic process;GO:0006139//nucleobase-containing compound metabolic process;GO:0006725//cellular aromatic compound metabolic process;GO:1901576//organic substance biosynthetic process;GO:0034645//cellular macromolecule biosynthetic process;GO:0043170//macromolecule metabolic process;GO:0009058//biosynthetic process;GO:00346…
3639513	3639513	XM_713746.2	Known_gene	1	1411658	1412701	NC_032089.1	+	1044	1044	651.82	500.74	715.24	1027.41	712.84	829.64	622.6	856.63	-0.435831	0.353728	0.144212	-0.656466	1.3277e-225	1.57181e-226	0.00484913	0.57836	0.55373	-0.728424	6.09451e-202	5.30492e-203	K18749//protein LSM14	XP_718839.1|9.1e-200|hypothetical protein CAALFM_C106600WA [Candida albicans SC5314]	GO:0031326//regulation of cellular biosynthetic process;GO:0044085//cellular component biogenesis;GO:0050794//regulation of cellular process;GO:0034249//negative regulation of cellular amide metabolic process;GO:0017148//negative regulation of translation;GO:0034063//stress granule assembly;GO:0032269//negative regulation of cellular protein metabolic process;GO:0048519//negative regulation of bi…
3635706	3635706	XM_717643.1	Known_gene	1	248784	249194	NC_032092.1	-	411	411	43.48	38.9	68.53	34.07	64.03	85.85	50.303	61.316	-0.250697	0.74511	0.54658	0.35185	0.0529787	0.0436728	0.0979877	0.377317	0.349844	-1.14205	1.2208e-13	5.227e-14	NA	XP_722736.1|7.2e-76|hypothetical protein CAALFM_C401230CA [Candida albicans SC5314]	NA
3638363	3638363	XM_714933.2	Known_gene	1	698460	699125	NC_032091.1	-	666	666	111.16	89.93	78.12	80.92	71.62	86.04	93.07	79.526	0.253651	0.665029	0.441053	0.45807	1.15338e-08	6.82912e-09	0.125329	0.139907	0.122687	0.0637949	0.209977	0.180338	K19589//release factor glutamine methyltransferase [EC:2.1.1.297]	KHC87485.1|5.7e-123|hypothetical protein I503_02844 [Candida albicans SC5314]	GO:0008152//metabolic process;GO:0032259//methylation;GO:0034708//methyltransferase complex;GO:0035657//eRF1 methyltransferase complex;GO:0032991//protein-containing complex;GO:0005622//intracellular;GO:1902494//catalytic complex;GO:1990234//transferase complex;GO:0008757//S-adenosylmethionine-dependent methyltransferase activity;GO:0140096//catalytic activity, acting on a protein;GO:0097159//org…
3643897	3643897	XM_709387.2	Known_gene	1	1699140	1700204	NC_032090.1	+	1065	1065	69.86	71.82	59.48	51.18	56.17	89.04	67.053	65.463	0.0632368	0.936214	0.856478	0.448886	3.4445e-09	1.9991e-09	0.0826048	0.265761	0.240774	-0.310068	1.92495e-05	1.14734e-05	K01247//DNA-3-methyladenine glycosylase II [EC:3.2.2.21]+ko03410//Base excision repair	XP_714480.2|3.9e-198|hypothetical protein CAALFM_C208420WA [Candida albicans SC5314]	GO:0046483//heterocycle metabolic process;GO:0006307//DNA dealkylation involved in DNA repair;GO:0009987//cellular process;GO:0006304//DNA modification;GO:0035510//DNA dealkylation;GO:0006284//base-excision repair;GO:0033554//cellular response to stress;GO:0044238//primary metabolic process;GO:0006725//cellular aromatic compound metabolic process;GO:0034641//cellular nitrogen compound metabolic p…
3646499	TCP1	XM_706796.1	Known_gene	1	1872858	1874522	NC_032089.1	+	1665	1665	64.4	58.13	84.98	72.31	73.64	82.59	69.17	76.18	-0.139318	0.795696	0.615611	-0.167134	0.00280583	0.00208934	0.206634	5.59203e-05	3.9288e-05	-0.506684	4.19653e-19	1.54082e-19	K09493//T-complex protein 1 subunit alpha	XP_007376933.1|3.9e-285|hypothetical protein SPAPADRAFT_62812 [Spathaspora passalidarum NRRL Y-27907]	GO:0009987//cellular process;GO:0006457//protein folding;GO:0110165//cellular anatomical entity;GO:0005737//cytoplasm;GO:0005622//intracellular;GO:0000166//nucleotide binding;GO:0035639//purine ribonucleoside triphosphate binding;GO:0032553//ribonucleotide binding;GO:1901363//heterocyclic compound binding;GO:0043168//anion binding;GO:0097159//organic cyclic compound binding;GO:0005488//binding;GO…
3644542	KRR1	XM_708702.2	Known_gene	1	2504035	2505111	NC_032089.1	+	1077	1077	34.64	87	86.6	193.85	152.24	163.17	69.413	169.753	-1.19748	0.020785	0.002083	-2.48443	0	0	-0.813909	1.84921e-48	4.9936e-49	-0.907289	6.69893e-62	1.29566e-62	K06961//ribosomal RNA assembly protein	XP_713795.1|1.1e-205|ribosome biosynthesis protein [Candida albicans SC5314]	GO:0034470//ncRNA processing;GO:0022613//ribonucleoprotein complex biogenesis;GO:0006139//nucleobase-containing compound metabolic process;GO:0090304//nucleic acid metabolic process;GO:0009987//cellular process;GO:1901360//organic cyclic compound metabolic process;GO:0043170//macromolecule metabolic process;GO:0044238//primary metabolic process;GO:0034641//cellular nitrogen compound metabolic pro…
3639267	PEP3	XM_714053.2	Known_gene	1	630448	632880	NC_032094.1	+	2433	2433	11.91	13.92	16.2	25.93	20.34	24.74	14.01	23.67	-0.727502	0.0775767	0.0131856	-1.12245	4.32624e-37	1.4742e-37	-0.328326	0.000290215	0.000211312	-0.829686	2.53096e-21	8.79944e-22	K20181//vacuolar protein sorting-associated protein 18+ko04138//Autophagy - yeast	XP_719146.2|0.0e+00|tethering complex subunit [Candida albicans SC5314]	GO:0009987//cellular process;GO:0051049//regulation of transport;GO:0033036//macromolecule localization;GO:0034613//cellular protein localization;GO:0051179//localization;GO:0022406//membrane docking;GO:0032879//regulation of localization;GO:0051649//establishment of localization in cell;GO:0140352//export from cell;GO:0050794//regulation of cellular process;GO:0050789//regulation of biological p…
3640280	ALS1	BGI_novel_T000211,BGI_novel_T000212,XM_712984.2,BGI_novel_T000209,BGI_novel_T000207,BGI_novel_T000210,BGI_novel_T000213,BGI_novel_T000208	Known_gene	8	791291	795073	NC_032094.1	+	3783	3783	1617.04	3432.89	5558.67	5421.76	6767.16	6800.03	3536.2	6329.65	-0.805999	0.170681	0.0451777	-1.74541	0	0	-0.283811	0	0	-0.986117	0	0	K22493//agglutinin-like protein;K22493//agglutinin-like protein;K22493//agglutinin-like protein;K22493//agglutinin-like protein;K22493//agglutinin-like protein;K22493//agglutinin-like protein;K22493//agglutinin-like protein;K22493//agglutinin-like protein	XP_718077.1|0.0e+00|Als1p [Candida albicans SC5314]	GO:0048522//positive regulation of cellular process;GO:0046916//cellular transition metal ion homeostasis;GO:0043207//response to external biotic stimulus;GO:0044406//adhesion of symbiont to host;GO:0050801//ion homeostasis;GO:0030448//hyphal growth;GO:0098743//cell aggregation;GO:0044409//entry into host;GO:0055082//cellular chemical homeostasis;GO:0052031//modulation by symbiont of host defense…
3640224	MRP20	XM_713080.2	Known_gene	1	323650	324531	NC_032089.1	+	882	882	147.85	189.44	258.4	147.38	178.62	181.15	198.563	169.05	0.21739	0.693595	0.477446	0.00459348	0.951691	0.942926	0.532712	2.85992e-33	9.79098e-34	0.0645562	0.0518812	0.0410272	K02892//large subunit ribosomal protein L23+ko03010//Ribosome	XP_718173.2|3.5e-168|mitochondrial 54S ribosomal protein YmL41 [Candida albicans SC5314]	GO:0034645//cellular macromolecule biosynthetic process;GO:0009058//biosynthetic process;GO:0032543//mitochondrial translation;GO:0043043//peptide biosynthetic process;GO:0044267//cellular protein metabolic process;GO:1901576//organic substance biosynthetic process;GO:0043170//macromolecule metabolic process;GO:0034641//cellular nitrogen compound metabolic process;GO:0019538//protein metabolic pr…
3639256	MDL2	XM_714068.2	Known_gene	1	659079	661430	NC_032094.1	-	2352	2352	50.06	56.47	42.93	90.57	86.72	86.84	49.82	88.043	-0.764966	0.0760336	0.0127461	-0.855375	3.47468e-78	8.01178e-79	-1.01438	1.44274e-94	2.42144e-95	-0.620875	1.72032e-41	4.19746e-42	K01509//adenosinetriphosphatase [EC:3.6.1.3]+ko00230//Purine metabolism;K02021//putative ABC transport system ATP-binding protein	XP_719161.2|0.0e+00|Mdl2p [Candida albicans SC5314]	GO:1990542//mitochondrial transmembrane transport;GO:0006810//transport;GO:0006839//mitochondrial transport;GO:0071705//nitrogen compound transport;GO:0035672//oligopeptide transmembrane transport;GO:0071702//organic substance transport;GO:0042886//amide transport;GO:0055085//transmembrane transport;GO:0051179//localization;GO:0015833//peptide transport;GO:0009987//cellular process;GO:0006857//ol…
3641388	DBF4	XM_711895.1	Known_gene	1	639193	640713	NC_032095.1	-	1521	1521	130.01	103.49	83.99	70.13	97.98	151.98	105.83	106.696	0.0223684	0.979092	0.953991	0.890519	3.72882e-75	8.79756e-76	-0.22227	2.66178e-05	1.83631e-05	-0.55439	3.34884e-36	8.77306e-37	K02309//regulatory subunit for Cdc7p protein kinase+ko04113//Meiosis - yeast+ko04111//Cell cycle - yeast	XP_716988.1|5.2e-297|protein serine/threonine kinase activating protein [Candida albicans SC5314]	GO:0050794//regulation of cellular process;GO:2000105//positive regulation of DNA-dependent DNA replication;GO:0009891//positive regulation of biosynthetic process;GO:0050789//regulation of biological process;GO:0090329//regulation of DNA-dependent DNA replication;GO:0051726//regulation of cell cycle;GO:0009893//positive regulation of metabolic process;GO:0045740//positive regulation of DNA repli…
3639324	CCT8	XM_713965.1	Known_gene	1	17338	18960	NC_032089.1	+	1623	1623	263.87	236.58	290.08	209.12	173.33	187.27	263.51	189.906	0.461999	0.259982	0.087079	0.335496	4.94144e-29	1.91303e-29	0.742929	4.03357e-128	5.33498e-129	0.337208	1.01423e-28	3.0064e-29	K09500//T-complex protein 1 subunit theta	XP_719058.1|9.2e-300|chaperonin-containing T-complex subunit [Candida albicans SC5314]	GO:0036180//filamentous growth of a population of unicellular organisms in response to biotic stimulus;GO:0042221//response to chemical;GO:0007154//cell communication;GO:0042493//response to drug;GO:0071496//cellular response to external stimulus;GO:0051716//cellular response to stimulus;GO:0036171//filamentous growth of a population of unicellular organisms in response to chemical stimulus;GO:00…
3636911	3636911	XM_716453.2	Known_gene	1	727114	730086	NC_032089.1	-	2973	2973	6.45	8.48	6.03	2.75	4.49	4.89	6.986	4.043	0.751715	0.18966	0.0527272	1.22987	3.45338e-14	1.76543e-14	0.425443	0.00464258	0.00360986	0.79423	1.47114e-09	7.19378e-10	K09448//transcriptional enhancer factor+ko04011//MAPK signaling pathway - yeast+ko04392//Hippo signaling pathway - multiple species	XP_721546.2|0.0e+00|hypothetical protein CAALFM_C103460CA [Candida albicans SC5314]	GO:0003700//DNA-binding transcription factor activity;GO:0140110//transcription regulator activity;
3634869	ADE12	XM_718420.1	Known_gene	1	2122166	2123452	NC_032089.1	+	1287	1287	133.85	111.98	500.61	439.39	243.16	204.03	248.813	295.526	-0.282705	0.760586	0.565976	-1.71488	0	0	1.04178	4.20507e-301	2.64046e-302	-0.86554	1.46029e-87	2.21338e-88	K01939//adenylosuccinate synthase [EC:6.3.4.4]+ko00250//Alanine, aspartate and glutamate metabolism+ko00230//Purine metabolism+ko01100//Metabolic pathways	XP_723513.1|1.8e-250|adenylosuccinate synthase [Candida albicans SC5314]	GO:0019693//ribose phosphate metabolic process;GO:0046040//IMP metabolic process;GO:0051716//cellular response to stimulus;GO:0009161//ribonucleoside monophosphate metabolic process;GO:0044237//cellular metabolic process;GO:0044238//primary metabolic process;GO:0071248//cellular response to metal ion;GO:1901293//nucleoside phosphate biosynthetic process;GO:0044208//'de novo' AMP biosynthetic proc…
3636508	3636508	XM_716755.2	Known_gene	1	991257	992165	NC_032093.1	+	909	909	29.78	21.45	32.23	24.31	25.02	29.85	27.82	26.393	0.0786505	0.911221	0.806401	0.292794	0.0213761	0.0169735	0.365322	0.00257668	0.00197683	-0.476753	0.000649504	0.000425654	NA	XP_721848.2|1.0e-167|hypothetical protein CAALFM_C504550WA [Candida albicans SC5314]	GO:0031224//intrinsic component of membrane;GO:0043227//membrane-bounded organelle;GO:0031301//integral component of organelle membrane;GO:0072546//ER membrane protein complex;GO:0016021//integral component of membrane;GO:0031090//organelle membrane;GO:0016020//membrane;GO:0098796//membrane protein complex;GO:0012505//endomembrane system;GO:0031227//intrinsic component of endoplasmic reticulum me…
3638398	USO5	XM_714908.2	Known_gene	1	656093	657952	NC_032091.1	+	1860	1860	15.71	12.83	7.23	12.44	11.28	12.59	11.923	12.103	0.0216035	0.980671	0.957467	0.336697	0.00389101	0.00292086	-0.6417	1.4219e-05	9.69064e-06	0.0272429	0.749281	0.723092	K20361//intracellular protein transport protein USO1	XP_720001.2|0.0e+00|Uso5p [Candida albicans SC5314]	GO:0051726//regulation of cell cycle;GO:0090224//regulation of spindle organization;GO:0022414//reproductive process;GO:0036267//invasive filamentous growth;GO:0065007//biological regulation;GO:0033043//regulation of organelle organization;GO:0060236//regulation of mitotic spindle organization;GO:0070783//growth of unicellular organism as a thread of attached cells;GO:0048284//organelle fusion;GO…
3644115	TFB3	XM_019475407.1	Known_gene	1	158181	159323	NC_032093.1	-	1143	1083	68.04	62.06	50.79	59.17	82.43	70.29	60.296	70.63	-0.190325	0.764254	0.570614	0.201517	0.00679578	0.00519242	-0.698625	4.86962e-21	2.09976e-21	-0.179656	0.0372924	0.0289892	K10842//CDK-activating kinase assembly factor MAT1+ko03420//Nucleotide excision repair+ko03022//Basal transcription factors	XP_019330952.1|1.1e-208|TFIIH/NER complex subunit [Candida albicans SC5314]	GO:0009987//cellular process;GO:0051246//regulation of protein metabolic process;GO:0006281//DNA repair;GO:1903506//regulation of nucleic acid-templated transcription;GO:0044237//cellular metabolic process;GO:0033554//cellular response to stress;GO:0080090//regulation of primary metabolic process;GO:0006725//cellular aromatic compound metabolic process;GO:0051252//regulation of RNA metabolic proc…
3637984	3637984	XM_715300.1	Known_gene	1	30551	31618	NC_032095.1	+	1068	1068	29.2	21.35	43.5	13.05	16.42	29.99	31.35	19.82	0.600427	0.348198	0.140624	1.16192	1.23479e-18	5.73974e-19	1.40556	3.13288e-35	1.03488e-35	-0.490245	8.91457e-05	5.49764e-05	NA	XP_720393.1|1.9e-200|hypothetical protein CAALFM_C700220WA [Candida albicans SC5314]	GO:1901363//heterocyclic compound binding;GO:0005488//binding;GO:0097159//organic cyclic compound binding;GO:0003676//nucleic acid binding;
3640378	3640378	XM_712842.1	Known_gene	1	250793	251212	NC_032096.1	-	420	420	101.34	75.72	124.42	53.8	65.94	65.81	100.493	61.85	0.684468	0.136506	0.0318659	0.913526	2.39473e-13	1.25351e-13	0.915993	1.68494e-16	7.9942e-17	0.202368	0.0266383	0.0203312	K18185//cytochrome c oxidase assembly protein subunit 23	XP_717935.1|1.1e-79|hypothetical protein CAALFM_CR01100CA [Candida albicans SC5314]	GO:0043229//intracellular organelle;GO:0031974//membrane-enclosed lumen;GO:0031970//organelle envelope lumen;GO:0031975//envelope;GO:0043233//organelle lumen;GO:0043231//intracellular membrane-bounded organelle;GO:0043227//membrane-bounded organelle;GO:0031967//organelle envelope;GO:0005622//intracellular;GO:0005737//cytoplasm;GO:0043226//organelle;GO:0005740//mitochondrial envelope;GO:0005739//m…
3637414	HSP78	XM_715912.2	Known_gene	1	707074	709512	NC_032090.1	-	2439	2439	85.7	154.4	287.9	222.46	322.62	226.78	176	257.286	-0.547877	0.401083	0.181946	-1.37618	0	0	-0.164268	9.47378e-14	4.86346e-14	-0.554621	4.7495e-90	7.04724e-91	K03695//ATP-dependent Clp protease ATP-binding subunit ClpB+ko04213//Longevity regulating pathway - multiple species;K01509//adenosinetriphosphatase [EC:3.6.1.3]+ko00230//Purine metabolism	XP_721005.2|0.0e+00|chaperone ATPase [Candida albicans SC5314]	GO:0043229//intracellular organelle;GO:0005759//mitochondrial matrix;GO:0070013//intracellular organelle lumen;GO:0031974//membrane-enclosed lumen;GO:0005737//cytoplasm;GO:0043227//membrane-bounded organelle;GO:0005739//mitochondrion;GO:0005622//intracellular;GO:0043226//organelle;GO:0043233//organelle lumen;GO:0043231//intracellular membrane-bounded organelle;GO:0110165//cellular anatomical enti…
3647092	3647092	XM_706206.1	Known_gene	1	2052941	2054116	NC_032096.1	+	1176	1176	NA	NA	NA	NA	NA	NA	NA	NA	NA	NA	NA	NA	NA	NA	NA	NA	NA	NA	NA	NA	K19898//alpha-agglutinin	XP_711298.1|1.8e-220|hypothetical protein CAALFM_CR09660WA [Candida albicans SC5314]	GO:0051726//regulation of cell cycle;GO:0050794//regulation of cellular process;GO:0065007//biological regulation;GO:0050789//regulation of biological process;GO:0110165//cellular anatomical entity;GO:0005622//intracellular;GO:0043227//membrane-bounded organelle;GO:0043231//intracellular membrane-bounded organelle;GO:0043226//organelle;GO:0043229//intracellular organelle;GO:0005634//nucleus;
3642023	3642023	XM_711215.2	Known_gene	1	2672727	2674139	NC_032089.1	-	1413	1413	25.7	11.95	25.26	14.08	11.08	8.62	20.97	11.26	0.82283	0.156761	0.0396926	0.868121	2.89994e-14	1.48008e-14	1.1889	3.44505e-22	1.44579e-22	0.471251	0.00219322	0.00150441	K07050//misacylated tRNA(Ala) deacylase [EC:3.1.1.-]	XP_716308.2|4.6e-271|putative alanine--tRNA ligase [Candida albicans SC5314]	GO:0043038//amino acid activation;GO:0043039//tRNA aminoacylation;GO:0006419//alanyl-tRNA aminoacylation;GO:0043170//macromolecule metabolic process;GO:1901566//organonitrogen compound biosynthetic process;GO:0006418//tRNA aminoacylation for protein translation;GO:0034660//ncRNA metabolic process;GO:0006520//cellular amino acid metabolic process;GO:0044260//cellular macromolecule metabolic proces…
3638043	PMR1	XM_715287.1	Known_gene	1	48461	51214	NC_032095.1	-	2754	2754	24.89	35.76	36.96	22.14	29.48	47.91	32.536	33.176	-0.0214006	0.979083	0.953819	0.168911	0.0216464	0.0172026	0.326228	1.00257e-07	6.215e-08	-0.42198	3.51744e-14	1.48062e-14	K01537//Ca2+-transporting ATPase [EC:3.6.3.8]	XP_720380.1|0.0e+00|Ca(2+)/Mn(2+)-transporting P-type ATPase [Candida albicans SC5314]	GO:0071555//cell wall organization;GO:0055082//cellular chemical homeostasis;GO:0071852//fungal-type cell wall organization or biogenesis;GO:1901566//organonitrogen compound biosynthetic process;GO:0055085//transmembrane transport;GO:0051234//establishment of localization;GO:0051716//cellular response to stimulus;GO:0070588//calcium ion transmembrane transport;GO:0030447//filamentous growth;GO:00…
3635622	3635622	XM_717618.1	Known_gene	1	307183	307857	NC_032092.1	-	675	675	15.02	11.78	51.15	37.65	20.29	15.38	25.983	24.44	0.021606	0.985113	0.966582	-1.32577	5.03224e-17	2.41332e-17	1.33397	1.19196e-22	4.96452e-23	-0.384716	0.122991	0.101848	NA	XP_722711.1|1.5e-123|hypothetical protein CAALFM_C401460CA [Candida albicans SC5314]	NA
3640525	RPT2	XM_712719.2	Known_gene	1	39195	40520	NC_032091.1	+	1326	1326	649.83	551.29	357.2	474.58	326.7	401	519.44	400.76	0.390433	0.529036	0.289046	0.453411	1.34597e-96	2.75414e-97	0.128766	2.34011e-06	1.52686e-06	0.459209	1.87924e-91	2.76628e-92	K03062//26S proteasome regulatory subunit T2+ko03050//Proteasome	XP_717812.2|2.7e-249|proteasome regulatory particle base subunit [Candida albicans SC5314]	GO:0008152//metabolic process;GO:0030163//protein catabolic process;GO:0071704//organic substance metabolic process;GO:0044238//primary metabolic process;GO:0009057//macromolecule catabolic process;GO:0019538//protein metabolic process;GO:0043170//macromolecule metabolic process;GO:1901564//organonitrogen compound metabolic process;GO:1901575//organic substance catabolic process;GO:0009056//catab…
3636602	PPT1	XM_716657.2	Known_gene	1	369832	371523	NC_032091.1	-	1692	1692	12.28	16.68	28.67	53.7	55.33	46.68	19.21	51.903	-1.37925	0.00184323	9.20542e-05	-2.12861	1.37501e-128	2.35768e-129	-0.94852	1.38852e-38	4.33854e-39	-1.48469	3.22813e-66	5.90188e-67	K04460//serine/threonine-protein phosphatase 5 [EC:3.1.3.16]	XP_721750.2|0.0e+00|protein serine/threonine phosphatase [Candida albicans SC5314]	GO:0005634//nucleus;GO:0043231//intracellular membrane-bounded organelle;GO:0005829//cytosol;GO:0043226//organelle;GO:0043229//intracellular organelle;GO:0005622//intracellular;GO:0043227//membrane-bounded organelle;GO:0005737//cytoplasm;GO:0110165//cellular anatomical entity;GO:0042578//phosphoric ester hydrolase activity;GO:0004722//protein serine/threonine phosphatase activity;GO:0003824//cata…
3642614	SGE1	XM_710612.2	Known_gene	1	286734	288617	NC_032093.1	+	1884	1884	71.74	76.97	63.22	109.85	98.17	84.45	70.643	97.49	-0.425971	0.385827	0.170915	-0.614685	1.13284e-42	3.61364e-43	-0.634901	2.29041e-38	7.19864e-39	-0.133801	0.0143663	0.0106799	K22134//MFS transporter, DHA2 family, glioxin efflux transporter;K10866//DNA repair protein RAD50 [EC:3.6.-.-]+ko03440//Homologous recombination+ko03450//Non-homologous end-joining	XP_715705.2|0.0e+00|Sge1p [Candida albicans SC5314]	GO:0051234//establishment of localization;GO:0051179//localization;GO:0006810//transport;GO:0055085//transmembrane transport;GO:0009987//cellular process;GO:0071944//cell periphery;GO:0005887//integral component of plasma membrane;GO:0031226//intrinsic component of plasma membrane;GO:0005886//plasma membrane;GO:0016020//membrane;GO:0031224//intrinsic component of membrane;GO:0016021//integral com…
3639823	ARC35	XM_713367.2	Known_gene	1	1273457	1274497	NC_032089.1	-	1041	1041	39.72	30	54.15	48.59	41.16	48.97	41.29	46.24	-0.163139	0.787833	0.603826	-0.290794	0.0013587	0.000991044	0.395718	4.85476e-06	3.21948e-06	-0.706936	1.71139e-12	7.57198e-13	K05758//actin related protein 2/3 complex, subunit 2+ko04144//Endocytosis	XP_718460.1|2.1e-196|Arc35p [Candida albicans SC5314]	GO:0051130//positive regulation of cellular component organization;GO:0009987//cellular process;GO:0030833//regulation of actin filament polymerization;GO:0022607//cellular component assembly;GO:0035690//cellular response to drug;GO:0016043//cellular component organization;GO:0071840//cellular component organization or biogenesis;GO:0030029//actin filament-based process;GO:0050789//regulation of …
3635629	HAP3	XM_019475361.1	Known_gene	1	287625	288733	NC_032092.1	+	1109	990	65.4	97.67	97.41	55.3	67.05	47.08	86.826	56.476	0.593768	0.232949	0.073177	0.242011	0.00256456	0.0019028	0.538833	2.09121e-15	1.0222e-15	1.0528	5.61598e-49	1.24191e-49	K08065//nuclear transcription Y subunit beta	XP_019330906.1|1.1e-189|Hap3p [Candida albicans SC5314]	GO:0019222//regulation of metabolic process;GO:0070887//cellular response to chemical stimulus;GO:0050896//response to stimulus;GO:0006950//response to stress;GO:2000112//regulation of cellular macromolecule biosynthetic process;GO:0031326//regulation of cellular biosynthetic process;GO:0043620//regulation of DNA-templated transcription in response to stress;GO:0034599//cellular response to oxida…
3642258	3642258	XM_710994.1	Known_gene	1	1455629	1456801	NC_032091.1	-	1173	1173	212.69	244.85	396.41	141.72	188.27	315.96	284.65	215.316	0.365817	0.573294	0.333149	0.585709	1.1111e-44	3.44754e-45	1.07419	3.26031e-226	2.68426e-227	-0.367844	3.13112e-25	9.9074e-26	K14765//U3 small nucleolar ribonucleoprotein protein LCP5	XP_716087.1|1.5e-214|hypothetical protein CAALFM_C306370CA [Candida albicans SC5314]	GO:0010467//gene expression;GO:0044085//cellular component biogenesis;GO:0046483//heterocycle metabolic process;GO:0016072//rRNA metabolic process;GO:1901360//organic cyclic compound metabolic process;GO:0071704//organic substance metabolic process;GO:0006139//nucleobase-containing compound metabolic process;GO:0030490//maturation of SSU-rRNA;GO:0043170//macromolecule metabolic process;GO:0000462…
3636829	3636829	XM_716387.1	Known_gene	1	610205	611635	NC_032089.1	-	1431	1431	19.27	23.58	11.26	11.9	11.49	20.34	18.036	14.576	0.327526	0.666391	0.443188	0.695395	5.46021e-08	3.3116e-08	-0.029172	0.892324	0.882042	0.213244	0.0344177	0.0266562	K08329//autophagy-related protein 17+ko04138//Autophagy - yeast	XP_721480.1|6.7e-270|protein kinase regulatory subunit [Candida albicans SC5314]	GO:0019222//regulation of metabolic process;GO:0001934//positive regulation of protein phosphorylation;GO:0009987//cellular process;GO:0060255//regulation of macromolecule metabolic process;GO:0016237//lysosomal microautophagy;GO:0032147//activation of protein kinase activity;GO:1903008//organelle disassembly;GO:0061919//process utilizing autophagic mechanism;GO:0007005//mitochondrion organizatio…
3646284	ATM1	XM_706997.2	Known_gene	1	928032	930284	NC_032094.1	-	2253	2253	NA	NA	NA	NA	NA	NA	NA	NA	NA	NA	NA	NA	NA	NA	NA	NA	NA	NA	NA	NA	K05663//mitochondrial ABC transporter ATM+ko02010//ABC transporters	XP_712090.2|0.0e+00|ATP-binding cassette Fe/S cluster precursor transporter [Candida albicans SC5314]	GO:0055076//transition metal ion homeostasis;GO:0042592//homeostatic process;GO:0006811//ion transport;GO:0006875//cellular metal ion homeostasis;GO:0098771//inorganic ion homeostasis;GO:0006879//cellular iron ion homeostasis;GO:0006873//cellular ion homeostasis;GO:0055065//metal ion homeostasis;GO:0065008//regulation of biological quality;GO:0030003//cellular cation homeostasis;GO:0065007//biolo…
3638949	3638949	XM_714337.1	Known_gene	1	2281329	2282324	NC_032096.1	-	996	996	467.66	576.93	401.66	333.2	278.88	345.05	482.083	319.043	0.600877	0.211846	0.0627392	0.489072	3.91745e-58	1.06726e-58	0.52633	4.63542e-57	1.11396e-57	0.741591	5.82268e-161	5.87062e-162	K13989//Derlin-2/3+ko04141//Protein processing in endoplasmic reticulum	XP_719430.1|4.2e-194|hypothetical protein CAALFM_CR10810CA [Candida albicans SC5314]	GO:1901698//response to nitrogen compound;GO:0019941//modification-dependent protein catabolic process;GO:0050789//regulation of biological process;GO:0007165//signal transduction;GO:0008152//metabolic process;GO:0030433//ubiquitin-dependent ERAD pathway;GO:0006950//response to stress;GO:0051716//cellular response to stimulus;GO:0050794//regulation of cellular process;GO:0043632//modification-dep…
3646701	3646701	XM_706616.1	Known_gene	1	1210658	1211560	NC_032096.1	-	903	903	79.36	68.41	113.79	81.75	79.99	84.97	87.186	82.236	0.0748532	0.906881	0.798333	-0.0428067	0.568701	0.53918	0.508482	1.1317e-14	5.63202e-15	-0.312746	0.000184412	0.000116207	K20362//protein transport protein YIF1	XP_711708.1|1.7e-170|hypothetical protein CAALFM_CR05700CA [Candida albicans SC5314]	GO:0006810//transport;GO:0016192//vesicle-mediated transport;GO:0006888//endoplasmic reticulum to Golgi vesicle-mediated transport;GO:0051649//establishment of localization in cell;GO:0051234//establishment of localization;GO:0051641//cellular localization;GO:0009987//cellular process;GO:0046907//intracellular transport;GO:0051179//localization;GO:0048193//Golgi vesicle transport;GO:0005794//Golg…
3640297	3640297	XM_712975.2	Known_gene	1	769693	771234	NC_032094.1	-	1542	1542	33.26	28.64	63.14	23.89	28.02	28.62	41.68	26.843	0.570063	0.288821	0.103037	0.477381	1.07623e-07	6.59756e-08	1.1721	2.93954e-57	7.03958e-58	0.00100782	0.852536	0.834772	K20039//phenacrylate decarboxylase [EC:4.1.1.102]	XP_718068.2|7.9e-309|putative phenylacrylic acid decarboxylase [Candida albicans SC5314]	GO:1901360//organic cyclic compound metabolic process;GO:0071704//organic substance metabolic process;GO:0042537//benzene-containing compound metabolic process;GO:0019752//carboxylic acid metabolic process;GO:0043436//oxoacid metabolic process;GO:0072329//monocarboxylic acid catabolic process;GO:0044248//cellular catabolic process;GO:0044281//small molecule metabolic process;GO:0008152//metabolic…
3638514	FESUR1	XM_714797.1	Known_gene	1	1616538	1617209	NC_032091.1	+	672	672	279.37	194.2	397.91	329.34	357.89	320.94	290.493	336.056	-0.210337	0.71693	0.508308	-0.237401	8.82507e-08	5.3908e-08	0.152926	4.3433e-05	3.03262e-05	-0.72476	1.83404e-44	4.29618e-45	K03940//NADH dehydrogenase (ubiquinone) Fe-S protein 7 [EC:7.1.1.2 1.6.99.3]+ko01100//Metabolic pathways+ko00190//Oxidative phosphorylation	XP_719890.1|3.6e-125|Fesur1p [Candida albicans SC5314]	GO:0034622//cellular protein-containing complex assembly;GO:0006812//cation transport;GO:0022607//cellular component assembly;GO:0051234//establishment of localization;GO:0044237//cellular metabolic process;GO:0015672//monovalent inorganic cation transport;GO:0098660//inorganic ion transmembrane transport;GO:0098662//inorganic cation transmembrane transport;GO:0071840//cellular component organiza…
3646554	SCP1	XM_706732.2	Known_gene	1	1301184	1301768	NC_032090.1	-	585	585	98.69	66.28	80.97	45.19	78.95	90.93	81.98	71.69	0.206995	0.773467	0.582871	1.1269	8.43456e-28	3.33456e-28	0.0364482	0.598656	0.573962	-0.456183	3.38193e-05	2.04132e-05	K20526//transgelin	XP_711824.2|2.3e-107|Scp1p [Candida albicans SC5314]	NA
3641898	PHO88	XM_711368.1	Known_gene	1	1976705	1977280	NC_032096.1	-	576	576	250.5	310.35	255.81	221.22	251.05	300.43	272.22	257.566	0.114091	0.861878	0.716677	0.179329	0.00167422	0.00122763	0.0270979	0.438099	0.409858	0.0468673	0.0439104	0.0344362	NA	XP_716461.1|1.4e-101|Pho88p [Candida albicans SC5314]	GO:0051179//localization;GO:0006810//transport;GO:0015833//peptide transport;GO:0070972//protein localization to endoplasmic reticulum;GO:0033036//macromolecule localization;GO:0034613//cellular protein localization;GO:0071702//organic substance transport;GO:0051649//establishment of localization in cell;GO:0009987//cellular process;GO:0033365//protein localization to organelle;GO:0006886//intrac…
3647861	ENP1	XM_705443.1	Known_gene	1	822571	823998	NC_032095.1	-	1428	1428	110.71	114.22	110.84	168.69	145.89	156.11	111.923	156.896	-0.454899	0.287726	0.102168	-0.607589	3.26476e-47	9.84568e-48	-0.396402	2.51659e-18	1.1423e-18	-0.450748	8.72301e-24	2.86272e-24	K14797//essential nuclear protein 1	XP_710535.1|1.1e-272|snoRNA-binding rRNA-processing protein [Candida albicans SC5314]	GO:0031669//cellular response to nutrient levels;GO:0022613//ribonucleoprotein complex biogenesis;GO:0036170//filamentous growth of a population of unicellular organisms in response to starvation;GO:0009607//response to biotic stimulus;GO:0042254//ribosome biogenesis;GO:0006950//response to stress;GO:1901360//organic cyclic compound metabolic process;GO:0051716//cellular response to stimulus;GO:0…
3639715	3639715	XM_713566.1	Known_gene	1	75931	76707	NC_032096.1	-	777	777	441.36	335.27	316.57	749.01	702.55	781.01	364.4	744.19	-0.952092	0.0218812	0.00224749	-0.763029	4.76662e-151	7.34308e-152	-1.15008	6.9637e-262	4.83784e-263	-1.22002	0	0	NA	XP_718659.1|2.1e-140|hypothetical protein CAALFM_CR00310CA [Candida albicans SC5314]	NA
3646279	3646279	XM_707005.1	Known_gene	1	946421	947119	NC_032094.1	+	699	699	57.89	57.38	109.33	69.15	45.94	44.66	74.866	53.25	0.446822	0.445958	0.216483	-0.256415	0.00783317	0.00601916	1.25087	2.22227e-44	6.36472e-45	0.361565	0.000166784	0.000104706	K04649//ubiquitin-conjugating enzyme (huntingtin interacting protein 2) [EC:2.3.2.23]+ko04120//Ubiquitin mediated proteolysis	XP_712098.1|5.1e-130|E2 ubiquitin-conjugating protein [Candida albicans SC5314]	GO:0036503//ERAD pathway;GO:0044267//cellular protein metabolic process;GO:0071840//cellular component organization or biogenesis;GO:0070647//protein modification by small protein conjugation or removal;GO:0044260//cellular macromolecule metabolic process;GO:0043412//macromolecule modification;GO:0008152//metabolic process;GO:0044237//cellular metabolic process;GO:0010243//response to organonitro…
3647294	3647294	XM_706000.2,BGI_novel_T000272	Known_gene	2	1051306	1053439	NC_032096.1	-	2134	2110	4.34	2.87	5.84	12.43	11	20.47	4.35	14.633	-1.5587	0.00124198	5.54105e-05	-1.51806	7.27061e-15	3.64748e-15	-0.913463	1.71296e-11	9.42872e-12	-2.83439	1.00185e-58	1.99159e-59	NA	XP_711092.2|5.2e-267|hypothetical protein CAALFM_CR04860CA [Candida albicans SC5314]	NA
3643461	3643461	XM_709813.2	Known_gene	1	1065176	1067179	NC_032090.1	-	2004	2004	54.76	105.04	81.44	138.7	116.29	115.36	80.413	123.45	-0.573766	0.278025	0.0965472	-1.34077	5.91681e-207	7.4505e-208	-0.513918	2.28282e-33	7.7962e-34	-0.135204	0.0024086	0.00165821	K14844//pumilio homology domain family member 6	XP_714906.2|0.0e+00|hypothetical protein CAALFM_C205160CA [Candida albicans SC5314]	GO:0032268//regulation of cellular protein metabolic process;GO:0010556//regulation of macromolecule biosynthetic process;GO:0010608//posttranscriptional regulation of gene expression;GO:0051246//regulation of protein metabolic process;GO:0060255//regulation of macromolecule metabolic process;GO:0050794//regulation of cellular process;GO:0010468//regulation of gene expression;GO:0065007//biologic…
3644108	TAZ1	XM_709174.2	Known_gene	1	1904445	1905677	NC_032090.1	+	1233	1233	170.59	166.82	153.25	82.09	108.83	146.77	163.553	112.563	0.533961	0.300447	0.110586	1.05525	7.45778e-103	1.46358e-103	0.493811	1.72326e-25	6.8205e-26	0.184735	2.06108e-06	1.16232e-06	K13511//monolysocardiolipin acyltransferase [EC:2.3.1.-]+ko00564//Glycerophospholipid metabolism	XP_714267.2|1.6e-243|lysophosphatidylcholine acyltransferase [Candida albicans SC5314]	GO:0046471//phosphatidylglycerol metabolic process;GO:0006796//phosphate-containing compound metabolic process;GO:0035965//cardiolipin acyl-chain remodeling;GO:0008152//metabolic process;GO:0006650//glycerophospholipid metabolic process;GO:0071840//cellular component organization or biogenesis;GO:0046486//glycerolipid metabolic process;GO:0009987//cellular process;GO:0044238//primary metabolic pr…
3644579	HGT2	XM_708669.2	Known_gene	1	434412	436049	NC_032089.1	-	1638	1638	2939.09	3205.14	87.55	415.32	163.86	51.34	2077.26	210.173	1.76513	0.0969389	0.0185422	2.82307	0	0	-0.904285	2.96304e-99	4.8147e-100	5.96416	0	0	K08139//MFS transporter, SP family, sugar:H+ symporter+ko04113//Meiosis - yeast	XP_713762.1|0.0e+00|Hgt2p [Candida albicans SC5314]	GO:0006810//transport;GO:0009987//cellular process;GO:0015749//monosaccharide transmembrane transport;GO:0008643//carbohydrate transport;GO:0051179//localization;GO:0055085//transmembrane transport;GO:0071702//organic substance transport;GO:0051234//establishment of localization;GO:1904659//glucose transmembrane transport;GO:0034219//carbohydrate transmembrane transport;GO:0046323//glucose import…
3642294	3642294	XM_710938.2	Known_gene	1	1612098	1613135	NC_032090.1	+	1038	1038	16.06	22.14	64.88	54.52	61.3	24.13	34.36	46.65	-0.447126	0.601626	0.364559	-1.76331	2.16068e-59	5.8214e-60	0.0818867	0.254665	0.230296	-0.124173	0.466806	0.426016	K17868//diphthine methyl ester acylhydrolase [EC:3.1.1.97]	XP_716031.2|5.5e-205|diphthamide synthase [Candida albicans SC5314]	NA
3634822	3634822	XM_718432.1	Known_gene	1	2139718	2140614	NC_032089.1	+	897	897	33.35	30.28	69.65	42.07	34.06	44.83	44.426	40.32	0.10641	0.89437	0.771687	-0.335105	0.00181265	0.00133035	1.03204	1.20012e-28	4.46938e-29	-0.566099	7.35206e-07	4.05222e-07	K22386//GET complex subunit GET2	XP_723525.1|8.7e-167|GET complex subunit [Candida albicans SC5314]	GO:0070727//cellular macromolecule localization;GO:0071840//cellular component organization or biogenesis;GO:0010256//endomembrane system organization;GO:0045184//establishment of protein localization;GO:0061024//membrane organization;GO:0016192//vesicle-mediated transport;GO:0051179//localization;GO:0006996//organelle organization;GO:0051205//protein insertion into membrane;GO:0007029//endoplasm…
3642820	3642820	XM_019475394.1	Known_gene	1	1378116	1378936	NC_032092.1	-	821	618	0.32	0	0.17	0	0.93	0	0.163	0.31	-0.197805	0.8798	0.748263	5	0.265989	0.237528	-2.4517	0.111167	0.0963704	NA	NA	NA	K06695//26S proteasome regulatory subunit, ATPase 3, interacting protein	XP_019330939.1|1.8e-110|hypothetical protein CAALFM_C406150CA [Candida albicans SC5314]	GO:0046483//heterocycle metabolic process;GO:0006139//nucleobase-containing compound metabolic process;GO:0043170//macromolecule metabolic process;GO:1903046//meiotic cell cycle process;GO:0006725//cellular aromatic compound metabolic process;GO:0022402//cell cycle process;GO:0007049//cell cycle;GO:0006996//organelle organization;GO:0006807//nitrogen compound metabolic process;GO:0007127//meiosis…
3639210	CDC37	XM_714002.1	Known_gene	1	532206	533732	NC_032094.1	-	1527	1527	7.17	19.31	26.61	24.99	23.16	9.34	17.696	19.163	-0.132986	0.900623	0.785478	-1.80131	9.45884e-44	2.96658e-44	0.200333	0.0392002	0.0326996	1.04785	2.93955e-16	1.16327e-16	K09554//cell division cycle protein 37	XP_719095.1|1.5e-288|Cdc37p [Candida albicans SC5314]	GO:0065007//biological regulation;GO:0051301//cell division;GO:0009987//cellular process;GO:0035690//cellular response to drug;GO:0006457//protein folding;GO:0042221//response to chemical;GO:0031647//regulation of protein stability;GO:0065008//regulation of biological quality;GO:0042493//response to drug;GO:0051716//cellular response to stimulus;GO:0007049//cell cycle;GO:0070887//cellular respons…
3645742	3645742	XM_707521.2	Known_gene	1	144138	145490	NC_032092.1	-	1353	1353	60.04	76.12	92.07	25.11	31.21	50.18	76.076	35.5	1.03753	0.0310584	0.00352619	1.25766	5.69975e-54	1.60723e-54	1.56072	1.36206e-110	2.03354e-111	0.601163	1.07258e-21	3.70204e-22	K01409//N6-L-threonylcarbamoyladenine synthase [EC:2.3.1.234]	XP_712614.2|1.5e-263|putative N(6)-L-threonylcarbamoyladenine synthase [Candida albicans SC5314]	GO:0006139//nucleobase-containing compound metabolic process;GO:0034660//ncRNA metabolic process;GO:0090304//nucleic acid metabolic process;GO:0044238//primary metabolic process;GO:1901360//organic cyclic compound metabolic process;GO:0008152//metabolic process;GO:0009987//cellular process;GO:0140053//mitochondrial gene expression;GO:0006807//nitrogen compound metabolic process;GO:0070900//mitoch…
3637001	LDG3	XM_716234.2,BGI_novel_T000243	Known_gene	2	493961	496065	NC_032095.1	+	2105	459	4.08	11.63	14.96	1.16	4.91	0.69	10.223	2.253	1.64699	0.073178	0.0120969	1.81444	0.0108452	0.00841358	1.60732	2.21695e-06	1.44538e-06	4.07511	8.57328e-13	3.75e-13	NA	XP_721327.2|1.6e-79|Ldg3p [Candida albicans SC5314]	NA
3645890	SWD3	XM_707404.1	Known_gene	1	451184	452335	NC_032094.1	-	1152	1152	9.17	6.84	15.66	6.92	5.28	5.25	10.556	5.816	0.770179	0.200586	0.0579213	0.40615	0.0466251	0.0381854	1.56847	5.2491e-17	2.45624e-17	0.381679	0.0884641	0.071577	K14963//COMPASS component SWD3	XP_712497.1|1.3e-218|Swd3p [Candida albicans SC5314]	GO:0051276//chromosome organization;GO:0006996//organelle organization;GO:0006464//cellular protein modification process;GO:0016570//histone modification;GO:0018022//peptidyl-lysine methylation;GO:0018193//peptidyl-amino acid modification;GO:0008213//protein alkylation;GO:0006479//protein methylation;GO:0018205//peptidyl-lysine modification;GO:1901564//organonitrogen compound metabolic process;GO…
3646928	AVT1	XM_706396.1	Known_gene	1	1288828	1290435	NC_032090.1	-	1608	1608	35.2	47.91	52.59	60.4	71.75	90.66	45.233	74.27	-0.679894	0.135678	0.03126	-0.778973	2.2854e-30	8.62192e-31	-0.44819	2.21382e-13	1.14758e-13	-0.920139	2.35691e-56	4.80412e-57	K15015//solute carrier family 32 (vesicular inhibitory amino acid transporter)	XP_711488.1|2.2e-306|Avt1p [Candida albicans SC5314]	GO:0051179//localization;GO:0071705//nitrogen compound transport;GO:0015849//organic acid transport;GO:0003333//amino acid transmembrane transport;GO:0071702//organic substance transport;GO:0009987//cellular process;GO:0098656//anion transmembrane transport;GO:0055085//transmembrane transport;GO:0006811//ion transport;GO:0046942//carboxylic acid transport;GO:0051234//establishment of localization…
3645426	3645426	XM_707865.2	Known_gene	1	391247	392764	NC_032089.1	-	1518	1518	16.57	19.55	39.33	11.04	12.29	15.61	25.15	12.98	0.860517	0.110153	0.0229016	0.585833	8.37088e-06	5.52966e-06	1.67815	3.14084e-60	7.34332e-61	0.324698	0.0036155	0.0025286	K15027//translation initiation factor 2D	XP_712958.2|1.5e-288|hypothetical protein CAALFM_C101900CA [Candida albicans SC5314]	GO:0071840//cellular component organization or biogenesis;GO:0044267//cellular protein metabolic process;GO:1901566//organonitrogen compound biosynthetic process;GO:0034645//cellular macromolecule biosynthetic process;GO:0002183//cytoplasmic translational initiation;GO:0010467//gene expression;GO:0044237//cellular metabolic process;GO:0009058//biosynthetic process;GO:0044260//cellular macromolecu…
3646927	3646927	XM_706395.1	Known_gene	1	1285202	1288468	NC_032090.1	+	3267	3267	53.13	64.12	40.61	72.71	116.53	140.39	52.62	109.876	-0.963172	0.0670526	0.0106489	-0.452627	1.46555e-29	5.60748e-30	-1.52079	0	0	-1.13059	6.2477e-261	4.56688e-262	K20184//vacuolar protein sorting-associated protein 41+ko04138//Autophagy - yeast;K21627//protein IFH1;K15561//nuclear polyadenylated RNA-binding protein 3	XP_711487.1|0.0e+00|hypothetical protein CAALFM_C206320WA [Candida albicans SC5314]	GO:0043226//organelle;GO:0035770//ribonucleoprotein granule;GO:0043228//non-membrane-bounded organelle;GO:0043232//intracellular non-membrane-bounded organelle;GO:0010494//cytoplasmic stress granule;GO:0005622//intracellular;GO:0036464//cytoplasmic ribonucleoprotein granule;GO:0110165//cellular anatomical entity;GO:0043229//intracellular organelle;GO:0099080//supramolecular complex;GO:0005737//cy…
3638916	3638916	XM_714262.1	Known_gene	1	2174773	2176227	NC_032096.1	-	1455	1455	11	14.54	58.55	51.51	16.83	14.75	28.03	27.696	-0.0514141	0.9678	0.926462	-2.22735	1.04484e-110	1.98575e-111	1.79863	1.57301e-93	2.66896e-94	-0.0206877	0.993079	0.992078	K01424//L-asparaginase [EC:3.5.1.1]+ko00250//Alanine, aspartate and glutamate metabolism+ko01100//Metabolic pathways+ko01110//Biosynthesis of secondary metabolites+ko00460//Cyanoamino acid metabolism	XP_719355.1|5.2e-278|asparaginase [Candida albicans SC5314]	GO:0008152//metabolic process;GO:0009065//glutamine family amino acid catabolic process;GO:0044237//cellular metabolic process;GO:1901564//organonitrogen compound metabolic process;GO:0044238//primary metabolic process;GO:0019752//carboxylic acid metabolic process;GO:0034641//cellular nitrogen compound metabolic process;GO:1901606//alpha-amino acid catabolic process;GO:1901575//organic substance …
3639682	3639682	XM_713559.1	Known_gene	1	95282	96580	NC_032096.1	+	1299	1299	3.38	5.78	10.81	5.22	4.67	15.33	6.656	8.406	-0.307918	0.751195	0.555111	-0.627027	0.0171068	0.0134517	1.21087	1.07948e-09	6.2519e-10	-1.40722	7.43656e-16	2.98412e-16	K00354//NADPH2 dehydrogenase [EC:1.6.99.1]	XP_718652.1|8.8e-253|hypothetical protein CAALFM_CR00380WA [Candida albicans SC5314]	GO:1901265//nucleoside phosphate binding;GO:0005488//binding;GO:0016651//oxidoreductase activity, acting on NAD(P)H;GO:0003959//NADPH dehydrogenase activity;GO:0097367//carbohydrate derivative binding;GO:0000166//nucleotide binding;GO:1901363//heterocyclic compound binding;GO:0032553//ribonucleotide binding;GO:0036094//small molecule binding;GO:0010181//FMN binding;GO:0016491//oxidoreductase acti…
3637770	IFH1	XM_715497.2	Known_gene	1	595462	598119	NC_032093.1	-	2658	2658	55.71	105.52	38.53	92.56	94.99	171.93	66.586	119.826	-0.717839	0.295597	0.107718	-0.732453	7.75028e-70	1.89864e-70	-1.30179	1.05049e-174	1.08418e-175	-0.704305	3.26925e-115	4.09824e-116	K21627//protein IFH1	XP_720590.2|0.0e+00|Ifh1p [Candida albicans SC5314]	GO:0031328//positive regulation of cellular biosynthetic process;GO:2000112//regulation of cellular macromolecule biosynthetic process;GO:0044260//cellular macromolecule metabolic process;GO:0098781//ncRNA transcription;GO:0009891//positive regulation of biosynthetic process;GO:0006807//nitrogen compound metabolic process;GO:1903506//regulation of nucleic acid-templated transcription;GO:0009987//…
3635637	ARL1	XM_717582.1	Known_gene	1	369339	369896	NC_032092.1	-	558	558	181.02	139.01	106.9	91.54	114.19	98.36	142.31	101.363	0.505936	0.373581	0.158836	0.983675	9.54893e-38	3.22828e-38	-0.0951745	0.386715	0.359332	0.499045	4.65107e-12	2.08364e-12	K07942//ADP-ribosylation factor-like protein 1	XP_722675.1|2.0e-100|Arf family GTPase [Candida albicans SC5314]	GO:0070887//cellular response to chemical stimulus;GO:0051234//establishment of localization;GO:0060560//developmental growth involved in morphogenesis;GO:0040007//growth;GO:0016049//cell growth;GO:0000902//cell morphogenesis;GO:0042886//amide transport;GO:0050896//response to stimulus;GO:0032502//developmental process;GO:0015833//peptide transport;GO:0051716//cellular response to stimulus;GO:000…
3637996	RPA135	XM_715261.1	Known_gene	1	92423	95923	NC_032095.1	+	3501	3501	46.05	72.2	119.55	147.31	112.18	122.34	79.266	127.276	-0.671399	0.212759	0.0630803	-1.67758	0	0	0.0917986	0.00135947	0.00102709	-0.760825	4.90109e-126	5.8062e-127	K03002//DNA-directed RNA polymerase I subunit RPA2 [EC:2.7.7.6]+ko03020//RNA polymerase	XP_720354.1|0.0e+00|DNA-directed RNA polymerase I core subunit [Candida albicans SC5314]	GO:0043170//macromolecule metabolic process;GO:0034641//cellular nitrogen compound metabolic process;GO:0006139//nucleobase-containing compound metabolic process;GO:0019438//aromatic compound biosynthetic process;GO:0010467//gene expression;GO:0046483//heterocycle metabolic process;GO:0032774//RNA biosynthetic process;GO:0009059//macromolecule biosynthetic process;GO:1901576//organic substance bi…
3642975	UGA6	XM_710268.2	Known_gene	1	570077	571711	NC_032090.1	+	1635	1635	0.25	0.37	0.16	0.24	0.1	0	0.26	0.113	0.579468	0.665029	0.44093	0.0588937	0.960181	0.954232	0.678072	0.61692	0.592194	5.20945	0.0068815	0.00495616	K09885//aquaporin rerated protein, other eukaryote;K19564//choline transport protein	XP_715361.2|0.0e+00|Uga6p [Candida albicans SC5314]	GO:0031224//intrinsic component of membrane;GO:0016021//integral component of membrane;GO:0016020//membrane;GO:0110165//cellular anatomical entity;GO:0022857//transmembrane transporter activity;GO:0005215//transporter activity;
3637352	CAK1	XM_715824.2	Known_gene	1	895055	896074	NC_032090.1	+	1020	1020	47.2	48.79	67.31	62.11	40.57	43.62	54.433	48.766	0.150083	0.814712	0.640391	-0.396039	1.34698e-06	8.60694e-07	0.730408	1.74946e-18	7.92048e-19	0.161596	0.0390046	0.0303988	K06667//serine/threonine-protein kinase CAK1 [EC:2.7.11.22]+ko04111//Cell cycle - yeast	XP_720917.2|5.4e-197|cyclin-dependent protein kinase-activating kinase [Candida albicans SC5314]	GO:0071900//regulation of protein serine/threonine kinase activity;GO:1904029//regulation of cyclin-dependent protein kinase activity;GO:0043412//macromolecule modification;GO:0051716//cellular response to stimulus;GO:0060255//regulation of macromolecule metabolic process;GO:0016310//phosphorylation;GO:0031399//regulation of protein modification process;GO:0007154//cell communication;GO:0080090//…
3645950	3645950	XM_707306.2	Known_gene	1	984319	985389	NC_032094.1	-	1071	1071	80.52	54.84	43.45	55.94	37.54	42.67	59.603	45.383	0.403429	0.529045	0.289226	0.525467	1.61781e-13	8.42498e-14	0.210928	0.021698	0.0176794	0.362006	4.91184e-06	2.82528e-06	K15385//aspyridone synthetase trans-acting enoyl reductase;K00344//NADPH2:quinone reductase [EC:1.6.5.5];K11293//protein HIRA/HIR1	XP_712399.2|1.5e-197|hypothetical protein CAALFM_C604410CA [Candida albicans SC5314]	GO:0016491//oxidoreductase activity;GO:0003824//catalytic activity;
3643760	FCR3	XM_709517.1	Known_gene	1	407947	409146	NC_032093.1	+	1200	1200	70.95	94.6	55.99	193.8	193.78	224.08	73.846	203.886	-1.34616	0.0020666	0.000106344	-1.44969	7.1747e-185	9.64716e-186	-1.79118	3.03216e-237	2.3597e-238	-1.2441	1.32144e-161	1.32344e-162	K09043//AP-1-like transcription factor	XP_714610.1|1.1e-230|Fcr3p [Candida albicans SC5314]	GO:0031326//regulation of cellular biosynthetic process;GO:0030155//regulation of cell adhesion;GO:0048518//positive regulation of biological process;GO:0090605//submerged biofilm formation;GO:0006355//regulation of transcription, DNA-templated;GO:0010811//positive regulation of cell-substrate adhesion;GO:0060255//regulation of macromolecule metabolic process;GO:0065007//biological regulation;GO:…
3645447	3645447	XM_707831.1	Known_gene	1	948352	949059	NC_032090.1	-	708	708	66.84	47.68	76.3	30.42	30	48.32	63.606	36.246	0.775213	0.117893	0.0254952	1.13569	1.39679e-24	5.81452e-25	1.34672	1.56837e-35	5.14932e-36	-0.0192362	0.84541	0.826942	NA	XP_712924.1|1.2e-134|hypothetical protein CAALFM_C204520CA [Candida albicans SC5314]	NA
3640122	3640122	XM_713147.2	Known_gene	1	400727	403447	NC_032096.1	-	2721	2721	85.4	94.33	33.87	64.38	61.33	80.06	71.2	68.59	0.0996005	0.915985	0.817427	0.407623	7.03474e-24	2.95902e-24	-0.856585	2.21069e-59	5.21292e-60	0.236635	7.96027e-11	3.7106e-11	K14773//U3 small nucleolar RNA-associated protein 23;K03510//DNA polymerase iota [EC:2.7.7.7]	XP_718240.2|0.0e+00|hypothetical protein CAALFM_CR01770CA [Candida albicans SC5314]	GO:0110165//cellular anatomical entity;GO:0016020//membrane;GO:0031224//intrinsic component of membrane;GO:0016021//integral component of membrane;
3634831	3634831	XM_718382.2	Known_gene	1	2044586	2045479	NC_032089.1	-	894	894	4.51	3.29	3.22	7.94	5.07	2.16	3.673	5.056	-0.37143	0.705148	0.492207	-0.816012	0.00259413	0.00192649	-0.654925	0.0602232	0.0509302	0.607056	0.126991	0.105481	K01792//glucose-6-phosphate 1-epimerase [EC:5.1.3.15]+ko00010//Glycolysis / Gluconeogenesis+ko01100//Metabolic pathways+ko01130//Biosynthesis of antibiotics+ko01110//Biosynthesis of secondary metabolites;K18622//adducin	XP_723475.2|1.7e-170|hypothetical protein CAALFM_C109300CA [Candida albicans SC5314]	GO:0008064//regulation of actin polymerization or depolymerization;GO:0061572//actin filament bundle organization;GO:0030036//actin cytoskeleton organization;GO:0030834//regulation of actin filament depolymerization;GO:0010639//negative regulation of organelle organization;GO:0032535//regulation of cellular component size;GO:0022607//cellular component assembly;GO:0030833//regulation of actin fil…
3636858	EHD3	XM_716434.1	Known_gene	1	691821	693329	NC_032089.1	-	1509	1509	158.62	114.43	95.94	405.27	366.46	540.12	122.996	437.283	-1.68934	6.54649e-05	1.67831e-06	-1.35331	0	0	-1.93345	0	0	-2.23881	0	0	K05605//3-hydroxyisobutyryl-CoA hydrolase [EC:3.1.2.4]+ko00410//beta-Alanine metabolism+ko00280//Valine, leucine and isoleucine degradation+ko01100//Metabolic pathways+ko00640//Propanoate metabolism+ko01200//Carbon metabolism	XP_721527.1|1.1e-291|Ehd3p [Candida albicans SC5314]	GO:0016054//organic acid catabolic process;GO:0044237//cellular metabolic process;GO:0006573//valine metabolic process;GO:1901565//organonitrogen compound catabolic process;GO:0009063//cellular amino acid catabolic process;GO:0071704//organic substance metabolic process;GO:0006574//valine catabolic process;GO:1901575//organic substance catabolic process;GO:1901564//organonitrogen compound metabol…
3637977	3637977	XM_715293.1	Known_gene	1	38507	39679	NC_032095.1	+	1173	1173	28.56	34.2	65.6	37.83	37.34	35.98	42.786	37.05	0.167848	0.811342	0.634811	-0.405535	3.09216e-05	2.0913e-05	0.812974	7.72996e-25	3.0956e-25	-0.0731989	0.625018	0.591094	K06199//fluoride exporter	XP_720386.1|6.8e-220|fluoride transporter [Candida albicans SC5314]	GO:0006820//anion transport;GO:0098656//anion transmembrane transport;GO:0034220//ion transmembrane transport;GO:0051234//establishment of localization;GO:0006811//ion transport;GO:0098660//inorganic ion transmembrane transport;GO:0009987//cellular process;GO:0055085//transmembrane transport;GO:0051179//localization;GO:0015698//inorganic anion transport;GO:0006810//transport;GO:0098661//inorganic…
3641390	3641390	XM_711897.2	Known_gene	1	635249	636553	NC_032095.1	-	1305	1305	73.4	96.28	93.66	83.5	70.23	114.59	87.78	89.44	-0.0106002	0.988138	0.973626	-0.185996	0.00183092	0.00134499	0.415346	7.83446e-13	4.13442e-13	-0.251173	8.09178e-06	4.71012e-06	K14801//pre-rRNA-processing protein TSR4	XP_716990.1|1.4e-253|hypothetical protein CAALFM_C702930CA [Candida albicans SC5314]	GO:0043170//macromolecule metabolic process;GO:0048522//positive regulation of cellular process;GO:0090304//nucleic acid metabolic process;GO:0034641//cellular nitrogen compound metabolic process;GO:0034660//ncRNA metabolic process;GO:1901360//organic cyclic compound metabolic process;GO:0044087//regulation of cellular component biogenesis;GO:0009987//cellular process;GO:0065007//biological regul…
3644399	3644399	XM_708811.2	Known_gene	1	2452098	2452403	NC_032089.1	-	306	306	21.64	49.95	125.49	59.57	43.36	60.05	65.693	54.326	0.227715	0.824128	0.653595	-1.46089	3.65998e-10	2.06778e-10	1.53314	1.02055e-21	4.32046e-22	-0.26568	0.543668	0.503836	K12161//ubiquitin related modifier 1+ko04122//Sulfur relay system	XP_713904.2|1.3e-50|ubiquitin-related modifier [Candida albicans SC5314]	GO:0050896//response to stimulus;GO:0043170//macromolecule metabolic process;GO:0000003//reproduction;GO:0044267//cellular protein metabolic process;GO:0006950//response to stress;GO:0044238//primary metabolic process;GO:0044260//cellular macromolecule metabolic process;GO:1901564//organonitrogen compound metabolic process;GO:0019954//asexual reproduction;GO:0034660//ncRNA metabolic process;GO:00…
3647563	3647563	XM_705755.2	Known_gene	1	414633	415973	NC_032094.1	-	1341	1341	316.19	280.36	103.15	115.26	168.84	151.64	233.233	145.246	0.668059	0.342939	0.137415	1.4559	0	0	-0.710913	1.67032e-54	4.13118e-55	0.88663	8.54995e-145	9.23814e-146	K13342//peroxin-5+ko04146//Peroxisome;K17608//striatin 1/3/4;K11648//SWI/SNF-related matrix-associated actin-dependent regulator of chromatin subfamily B member 1	XP_710847.2|1.0e-267|hypothetical protein CAALFM_C602020CA [Candida albicans SC5314]	GO:0071840//cellular component organization or biogenesis;GO:0071705//nitrogen compound transport;GO:0006605//protein targeting;GO:0016043//cellular component organization;GO:0033036//macromolecule localization;GO:0070727//cellular macromolecule localization;GO:0072662//protein localization to peroxisome;GO:0046907//intracellular transport;GO:0044743//protein transmembrane import into intracellul…
3644018	CIP1	XM_709227.2	Known_gene	1	209410	210309	NC_032094.1	-	900	900	22.68	18.54	38.68	48.72	37.21	39.9	26.633	41.943	-0.635064	0.225129	0.0694064	-1.10309	5.35325e-23	2.2858e-23	0.0558974	0.556735	0.529772	-1.10575	5.75858e-18	2.18886e-18	NA	XP_714320.2|5.7e-166|Cip1p [Candida albicans SC5314]	GO:0071248//cellular response to metal ion;GO:0009987//cellular process;GO:0051716//cellular response to stimulus;GO:0010035//response to inorganic substance;GO:0071276//cellular response to cadmium ion;GO:0062197//cellular response to chemical stress;GO:0033554//cellular response to stress;GO:0006950//response to stress;GO:0071241//cellular response to inorganic substance;GO:0006979//response to…
3637750	GYP8	XM_715529.2	Known_gene	1	645248	647530	NC_032093.1	-	2283	2283	48.21	46.57	29.18	34.48	40.45	69.67	41.32	48.2	-0.166654	0.835283	0.675778	0.483573	7.94056e-16	3.90114e-16	-0.47116	2.58381e-12	1.38985e-12	-0.581137	5.6718e-29	1.67266e-29	K20372//TBC1 domain family member 20	XP_720622.2|0.0e+00|Gyp8p [Candida albicans SC5314]	GO:0009987//cellular process;GO:0016192//vesicle-mediated transport;GO:0051649//establishment of localization in cell;GO:0006810//transport;GO:0051179//localization;GO:0006888//endoplasmic reticulum to Golgi vesicle-mediated transport;GO:0051641//cellular localization;GO:0051234//establishment of localization;GO:0048193//Golgi vesicle transport;GO:0046907//intracellular transport;GO:0110165//cell…
3636842	3636842	XM_716400.2	Known_gene	1	633766	634524	NC_032089.1	+	759	759	54.07	41.98	83.07	49.52	46.29	47.19	59.706	47.666	0.29745	0.599979	0.361466	0.126817	0.226473	0.200496	0.843627	1.80507e-20	7.87382e-21	-0.168779	0.25365	0.22002	NA	XP_721493.2|4.5e-140|hypothetical protein CAALFM_C103040WA [Candida albicans SC5314]	GO:0043227//membrane-bounded organelle;GO:0110165//cellular anatomical entity;GO:0043229//intracellular organelle;GO:0005622//intracellular;GO:0043226//organelle;GO:0005634//nucleus;GO:0043231//intracellular membrane-bounded organelle;GO:0005737//cytoplasm;
3636627	PMC1	XM_716705.1	Known_gene	1	264875	268510	NC_032091.1	+	3636	3636	1070.45	1157.65	1011.24	1353.22	1348.95	2038.04	1079.78	1580.07	-0.505523	0.296693	0.108463	-0.338179	0	0	-0.415711	0	0	-0.815983	0	0	K01537//Ca2+-transporting ATPase [EC:3.6.3.8]	XP_721798.1|0.0e+00|calcium-transporting ATPase [Candida albicans SC5314]	GO:0051716//cellular response to stimulus;GO:0055074//calcium ion homeostasis;GO:0072507//divalent inorganic cation homeostasis;GO:0055082//cellular chemical homeostasis;GO:0006873//cellular ion homeostasis;GO:0055065//metal ion homeostasis;GO:0019725//cellular homeostasis;GO:0035690//cellular response to drug;GO:0070887//cellular response to chemical stimulus;GO:0042592//homeostatic process;GO:0…
3636831	MST1	XM_716389.2	Known_gene	1	613106	614473	NC_032089.1	-	1368	1368	33.89	26.11	69.09	33.1	22.2	33.83	43.03	29.71	0.46602	0.46334	0.22978	0.0340284	0.727057	0.701004	1.63792	2.12961e-90	3.72718e-91	-0.373701	0.000195677	0.000123601	K01868//threonyl-tRNA synthetase [EC:6.1.1.3]+ko00970//Aminoacyl-tRNA biosynthesis	XP_721482.2|6.0e-268|threonine--tRNA ligase [Candida albicans SC5314]	GO:0006725//cellular aromatic compound metabolic process;GO:0140053//mitochondrial gene expression;GO:0000959//mitochondrial RNA metabolic process;GO:1901360//organic cyclic compound metabolic process;GO:0034641//cellular nitrogen compound metabolic process;GO:0071704//organic substance metabolic process;GO:0044260//cellular macromolecule metabolic process;GO:0044281//small molecule metabolic pro…
3641244	GAL4	XM_712048.1	Known_gene	1	2186547	2187332	NC_032090.1	+	786	786	372.24	540.97	229.05	92.59	221.41	106.66	380.753	140.22	1.33529	0.0320442	0.00365945	2.0073	0	0	0.0489422	0.220209	0.197188	2.34253	0	0	K09241//transcriptional regulatory protein GAL4	XP_717141.1|8.0e-148|galactose-responsive transcription factor [Candida albicans SC5314]	GO:0050896//response to stimulus;GO:0051252//regulation of RNA metabolic process;GO:0071496//cellular response to external stimulus;GO:0031329//regulation of cellular catabolic process;GO:0045913//positive regulation of carbohydrate metabolic process;GO:0007154//cell communication;GO:0010604//positive regulation of macromolecule metabolic process;GO:0009605//response to external stimulus;GO:00313…
3644041	3644041	XM_709244.1	Known_gene	1	237060	237734	NC_032094.1	+	675	675	1.13	2.3	16.69	4.93	4	2.78	6.706	3.903	0.495731	0.676899	0.45354	-2.12526	3.70721e-05	2.51596e-05	2.06091	3.59091e-14	1.81884e-14	-0.273451	0.671223	0.63998	K13130//gem associated protein 2+ko03013//RNA transport	XP_714337.1|2.8e-125|hypothetical protein CAALFM_C601200WA [Candida albicans SC5314]	GO:0043170//macromolecule metabolic process;GO:0071704//organic substance metabolic process;GO:0043933//protein-containing complex subunit organization;GO:0010467//gene expression;GO:0034622//cellular protein-containing complex assembly;GO:0044238//primary metabolic process;GO:0090304//nucleic acid metabolic process;GO:0008152//metabolic process;GO:0000398//mRNA splicing, via spliceosome;GO:00464…
3634860	3634860	XM_718453.1	Known_gene	1	2172939	2173751	NC_032089.1	+	813	813	0.9	1.03	0.96	1.19	0.66	0.74	0.963	0.863	0.132087	0.931135	0.846035	-0.402965	0.582595	0.553426	0.540568	0.499095	0.47159	0.477047	0.515566	0.474934	NA	XP_723546.1|2.5e-152|hypothetical protein CAALFM_C109930WA [Candida albicans SC5314]	NA
3647184	3647184	XM_706115.2	Known_gene	1	2318202	2319212	NC_032089.1	+	1011	1011	283.8	320.48	451.75	223.45	261.14	269.81	352.01	251.466	0.461156	0.300365	0.110506	0.344923	1.02181e-19	4.6488e-20	0.790701	3.27143e-131	4.21768e-132	0.248291	4.69639e-15	1.92796e-15	K02988//small subunit ribosomal protein S5+ko03010//Ribosome	XP_711207.2|3.7e-190|mitochondrial 37S ribosomal protein MRPS5 [Candida albicans SC5314]	GO:1901566//organonitrogen compound biosynthetic process;GO:0044238//primary metabolic process;GO:0009059//macromolecule biosynthetic process;GO:0043170//macromolecule metabolic process;GO:0006412//translation;GO:0008152//metabolic process;GO:0071704//organic substance metabolic process;GO:0006518//peptide metabolic process;GO:0044260//cellular macromolecule metabolic process;GO:0034641//cellular…
3637969	3637969	XM_715302.1	Known_gene	1	26062	27036	NC_032095.1	+	975	975	48.95	33.81	47.11	33.04	59.3	52.26	43.29	48.2	-0.138978	0.850377	0.697346	0.567095	6.21791e-09	3.64204e-09	-0.331999	0.000218913	0.000158335	-0.628257	3.99478e-10	1.91046e-10	K01183//chitinase [EC:3.2.1.14]+ko00520//Amino sugar and nucleotide sugar metabolism+ko01100//Metabolic pathways;K19848//signaling mucin HKR1+ko04011//MAPK signaling pathway - yeast	XP_720395.1|6.1e-174|hypothetical protein CAALFM_C700190WA [Candida albicans SC5314]	GO:0005618//cell wall;GO:0009277//fungal-type cell wall;GO:0071944//cell periphery;GO:0110165//cellular anatomical entity;GO:0030312//external encapsulating structure;
3639037	ZCF39	XM_714252.1	Known_gene	1	2152028	2154073	NC_032096.1	-	2046	2046	404.12	437.54	198.28	146.29	288.61	218.18	346.646	217.693	0.649395	0.329775	0.128463	1.46595	0	0	-0.541582	1.32853e-90	2.32072e-91	1.0039	0	0	NA	XP_719345.1|0.0e+00|Zcf39p [Candida albicans SC5314]	GO:0019222//regulation of metabolic process;GO:0051252//regulation of RNA metabolic process;GO:0040008//regulation of growth;GO:0080090//regulation of primary metabolic process;GO:2001141//regulation of RNA biosynthetic process;GO:0009607//response to biotic stimulus;GO:0009987//cellular process;GO:0051171//regulation of nitrogen compound metabolic process;GO:0010810//regulation of cell-substrate…
3644443	3644443	XM_708863.1	Known_gene	1	2373907	2374881	NC_032089.1	+	975	975	23.61	14.31	40.81	27.1	18.45	16.63	26.243	20.726	0.284222	0.704303	0.491382	-0.198895	0.1169	0.0999088	1.1453	3.32041e-22	1.39238e-22	-0.216764	0.261055	0.22697	NA	XP_713956.1|5.9e-185|hypothetical protein CAALFM_C110690WA [Candida albicans SC5314]	GO:0043226//organelle;GO:0110165//cellular anatomical entity;GO:0043231//intracellular membrane-bounded organelle;GO:0005737//cytoplasm;GO:0043229//intracellular organelle;GO:0043227//membrane-bounded organelle;GO:0005739//mitochondrion;GO:0005622//intracellular;
3645648	3645648	XM_707659.1	Known_gene	1	777344	779113	NC_032091.1	+	1770	1770	34.23	28.99	124.17	77.06	112.64	77.78	62.463	89.16	-0.526129	0.503541	0.263848	-1.17072	3.67891e-82	8.23628e-83	0.140597	0.000487878	0.000359472	-1.42384	5.38448e-108	7.05746e-109	K01634//sphinganine-1-phosphate aldolase [EC:4.1.2.27]+ko00600//Sphingolipid metabolism+ko01100//Metabolic pathways	XP_712752.1|0.0e+00|sphinganine-1-phosphate aldolase [Candida albicans SC5314]	GO:0019752//carboxylic acid metabolic process;GO:1901565//organonitrogen compound catabolic process;GO:0044238//primary metabolic process;GO:0006629//lipid metabolic process;GO:0006082//organic acid metabolic process;GO:0044248//cellular catabolic process;GO:0071704//organic substance metabolic process;GO:0006665//sphingolipid metabolic process;GO:0008152//metabolic process;GO:0043436//oxoacid me…
3638928	SPT7	XM_714241.1	Known_gene	1	2135208	2139131	NC_032096.1	+	3924	3924	17.95	27.34	9.97	26.95	32.68	30.43	18.42	30.02	-0.604254	0.364509	0.15191	-0.586301	1.27458e-21	5.58536e-22	-1.71274	3.55633e-136	4.46026e-137	-0.154481	0.00770199	0.0055665	K11359//transcriptional activator SPT7	XP_719334.1|0.0e+00|SAGA histone acetyltransferase complex subunit [Candida albicans SC5314]	GO:0060255//regulation of macromolecule metabolic process;GO:0036211//protein modification process;GO:0022607//cellular component assembly;GO:0043543//protein acylation;GO:0043933//protein-containing complex subunit organization;GO:0050794//regulation of cellular process;GO:0051276//chromosome organization;GO:0006355//regulation of transcription, DNA-templated;GO:0019538//protein metabolic proces…
3647693	RPC19	XM_705617.1	Known_gene	1	560832	561227	NC_032096.1	+	396	396	139.97	151.63	314.63	203.85	207.52	192.62	202.076	201.33	0.000189992	0.999853	0.999567	-0.54239	2.96137e-10	1.67011e-10	0.600406	9.98902e-19	4.49406e-19	-0.345202	0.00364237	0.00254862	K03020//DNA-directed RNA polymerases I and III subunit RPAC2+ko03020//RNA polymerase	XP_710709.1|1.1e-68|DNA-directed RNA polymerase core subunit [Candida albicans SC5314]	GO:0071704//organic substance metabolic process;GO:0010467//gene expression;GO:0006807//nitrogen compound metabolic process;GO:0043170//macromolecule metabolic process;GO:0034654//nucleobase-containing compound biosynthetic process;GO:0016070//RNA metabolic process;GO:0009987//cellular process;GO:0006351//transcription, DNA-templated;GO:0046483//heterocycle metabolic process;GO:0009304//tRNA tran…
3640197	ESP1	XM_713086.2	Known_gene	1	336700	341496	NC_032089.1	-	4797	4797	7.45	7.16	4.71	3.68	4.96	4.17	6.44	4.27	0.578177	0.315678	0.120764	1.01753	2.64056e-19	1.21151e-19	-0.0746131	0.561437	0.53434	0.779912	2.55244e-12	1.13404e-12	K02365//separase [EC:3.4.22.49]+ko04113//Meiosis - yeast+ko04111//Cell cycle - yeast	XP_718179.2|0.0e+00|separase [Candida albicans SC5314]	GO:0071840//cellular component organization or biogenesis;GO:0033043//regulation of organelle organization;GO:1903046//meiotic cell cycle process;GO:0016043//cellular component organization;GO:0022402//cell cycle process;GO:0022414//reproductive process;GO:0033045//regulation of sister chromatid segregation;GO:0090224//regulation of spindle organization;GO:0010564//regulation of cell cycle proces…
3641200	3641200	XM_712036.1	Known_gene	1	2171151	2171960	NC_032090.1	+	810	810	1617.47	1199.65	630.79	534.64	554.88	455.84	1149.3	515.12	1.11517	0.0491901	0.00670662	1.5971	0	0	0.184984	1.0106e-11	5.52892e-12	1.39601	0	0	K09467//zinc-finger protein CreA/MIG	XP_717129.1|1.3e-153|hypothetical protein CAALFM_C210540WA [Candida albicans SC5314]	GO:0051252//regulation of RNA metabolic process;GO:0071496//cellular response to external stimulus;GO:0035690//cellular response to drug;GO:0009605//response to external stimulus;GO:0031667//response to nutrient levels;GO:0000433//carbon catabolite repression of transcription from RNA polymerase II promoter by glucose;GO:0045990//carbon catabolite regulation of transcription;GO:0019222//regulatio…
3636956	3636956	XM_716324.1	Known_gene	1	310445	311785	NC_032095.1	+	1341	1341	22.03	24.02	27.99	12.92	6.03	9.61	24.68	9.52	1.29367	0.0068035	0.00048475	0.769863	7.93151e-10	4.52622e-10	2.21468	2.26765e-54	5.62748e-55	1.32163	1.44727e-24	4.64022e-25	K18932//palmitoyltransferase [EC:2.3.1.225]	XP_721417.1|6.1e-273|palmitoyltransferase [Candida albicans SC5314]	GO:0006605//protein targeting;GO:0008104//protein localization;GO:0009987//cellular process;GO:0072657//protein localization to membrane;GO:0006810//transport;GO:0015031//protein transport;GO:0018198//peptidyl-cysteine modification;GO:0018231//peptidyl-S-diacylglycerol-L-cysteine biosynthetic process from peptidyl-cysteine;GO:0044249//cellular biosynthetic process;GO:0044238//primary metabolic pr…
3641632	FPG1	XM_019475458.1	Known_gene	1	380495	381680	NC_032094.1	-	1186	1119	83.72	90.32	77.99	81.79	41.44	58.73	84.01	60.653	0.467603	0.409196	0.187262	0.0336478	0.622021	0.593274	0.912265	1.73515e-33	5.90554e-34	0.620948	2.79994e-22	9.5135e-23	K10563//formamidopyrimidine-DNA glycosylase [EC:3.2.2.23 4.2.99.18]+ko03410//Base excision repair	XP_019331003.1|2.2e-215|Fpg1p [Candida albicans SC5314]	GO:0044237//cellular metabolic process;GO:0006289//nucleotide-excision repair;GO:0006807//nitrogen compound metabolic process;GO:0044260//cellular macromolecule metabolic process;GO:0008152//metabolic process;GO:0046483//heterocycle metabolic process;GO:0006259//DNA metabolic process;GO:0006284//base-excision repair;GO:0006974//cellular response to DNA damage stimulus;GO:0006950//response to stre…
3647133	3647133	BGI_novel_T000185,BGI_novel_T000184,XM_019475444.1	Known_gene	3	114676	116519	NC_032094.1	-	1844	1600	182.6	98.12	500.41	398.68	361.99	276.05	260.376	345.573	-0.462734	0.544129	0.303632	-1.12654	1.02833e-301	9.86664e-303	0.467161	1.87431e-47	5.13026e-48	-1.49231	7.33675e-256	5.44924e-257	K05765//cofilin;K02953//small subunit ribosomal protein S13e+ko03010//Ribosome;K02953//small subunit ribosomal protein S13e+ko03010//Ribosome	XP_019330989.1|1.7e-69|hypothetical protein CAALFM_C600660CA [Candida albicans SC5314]	GO:0043603//cellular amide metabolic process;GO:0032535//regulation of cellular component size;GO:0009987//cellular process;GO:0051014//actin filament severing;GO:0051129//negative regulation of cellular component organization;GO:0050794//regulation of cellular process;GO:0044271//cellular nitrogen compound biosynthetic process;GO:0016072//rRNA metabolic process;GO:0042254//ribosome biogenesis;GO…
3640255	YMX6	XM_712959.2	Known_gene	1	739894	741762	NC_032094.1	+	1869	1869	163.46	227.33	44.77	3.96	10.59	3.11	145.186	5.886	3.89977	4.40064e-10	2.19776e-12	5.36729	0	0	2.07983	5.17311e-114	7.5074e-115	6.19173	0	0	K17871//NADH:ubiquinone reductase (non-electrogenic) [EC:1.6.5.9]	XP_718052.2|0.0e+00|Ymx6p [Candida albicans SC5314]	GO:0008152//metabolic process;GO:0019646//aerobic electron transport chain;GO:0044237//cellular metabolic process;GO:0009987//cellular process;GO:0006091//generation of precursor metabolites and energy;GO:0055114//oxidation-reduction process;GO:0022904//respiratory electron transport chain;GO:0009060//aerobic respiration;GO:0022900//electron transport chain;GO:0045333//cellular respiration;GO:001…
3647755	3647755	XM_705557.2	Known_gene	1	183121	185799	NC_032091.1	+	2679	2679	5.48	7.45	2.26	4.67	4.99	5.18	5.063	4.946	0.0777955	0.939851	0.868662	0.230753	0.155511	0.1352	-1.14272	7.73948e-09	4.63102e-09	0.524288	0.000222259	0.000141026	K20361//intracellular protein transport protein USO1	XP_710649.2|0.0e+00|hypothetical protein CAALFM_C300910WA [Candida albicans SC5314]	NA
3644561	PLB1	XM_708729.2	Known_gene	1	405913	407730	NC_032094.1	+	1818	1818	NA	NA	NA	NA	NA	NA	NA	NA	NA	NA	NA	NA	NA	NA	NA	NA	NA	NA	NA	NA	K13333//lysophospholipase [EC:3.1.1.5]+ko00564//Glycerophospholipid metabolism	XP_713822.1|0.0e+00|Plb1p [Candida albicans SC5314]	GO:0008152//metabolic process;GO:0009405//pathogenesis;GO:0009987//cellular process;GO:0044242//cellular lipid catabolic process;GO:0046475//glycerophospholipid catabolic process;GO:0016042//lipid catabolic process;GO:0051701//interaction with host;GO:0046434//organophosphate catabolic process;GO:0006793//phosphorus metabolic process;GO:0009056//catabolic process;GO:0046503//glycerolipid cataboli…
3640977	3640977	XM_712271.2	Known_gene	1	932629	934485	NC_032096.1	+	1857	1857	85.15	138.75	88.71	241.86	197.74	217.79	104.203	219.13	-0.988991	0.0335259	0.00390122	-1.50609	0	0	-1.15644	7.92244e-205	7.11802e-206	-0.65045	1.35578e-85	2.09826e-86	K14835//25S rRNA (cytosine2870-C5)-methyltransferase [EC:2.1.1.310]	XP_001525417.1|2.7e-287|nucleolar protein NOP2 [Lodderomyces elongisporus NRRL YB-4239]	GO:0006725//cellular aromatic compound metabolic process;GO:0022613//ribonucleoprotein complex biogenesis;GO:0032259//methylation;GO:0006807//nitrogen compound metabolic process;GO:0090304//nucleic acid metabolic process;GO:0043170//macromolecule metabolic process;GO:0042254//ribosome biogenesis;GO:0008152//metabolic process;GO:0016070//RNA metabolic process;GO:0016072//rRNA metabolic process;GO:…
3640763	NOT5	XM_712551.2	Known_gene	1	1820165	1822153	NC_032089.1	+	1989	1989	111.26	126.93	57.4	167.49	180.79	122.84	98.53	157.04	-0.581751	0.364976	0.152455	-0.59014	2.00274e-63	5.16112e-64	-1.65519	0	0	0.0472527	0.121138	0.100233	K12580//CCR4-NOT transcription complex subunit 3+ko03018//RNA degradation	XP_717644.2|0.0e+00|CCR4-NOT core subunit [Candida albicans SC5314]	GO:0051246//regulation of protein metabolic process;GO:0043170//macromolecule metabolic process;GO:0010556//regulation of macromolecule biosynthetic process;GO:0048523//negative regulation of cellular process;GO:0044419//interspecies interaction between organisms;GO:0051252//regulation of RNA metabolic process;GO:0010558//negative regulation of macromolecule biosynthetic process;GO:0006725//cellu…
3634906	3634906	XM_718491.2	Known_gene	1	2279973	2281007	NC_032089.1	+	1035	1035	37.8	32.1	33.9	15.9	8.19	8.55	34.6	10.88	1.57144	0.00100001	4.16186e-05	1.24936	1.56717e-25	6.4109e-26	2.04935	1.09549e-44	3.12292e-45	1.90858	7.52712e-41	1.85806e-41	K22438//trans-aconitate 3-methyltransferase [EC:2.1.1.145]	XP_723584.2|5.0e-198|hypothetical protein CAALFM_C110310WA [Candida albicans SC5314]	GO:0016740//transferase activity;GO:0016741//transferase activity, transferring one-carbon groups;GO:0008168//methyltransferase activity;GO:0003824//catalytic activity;
3644080	RPN10	XM_709180.1	Known_gene	1	1253885	1254724	NC_032090.1	-	840	840	230.81	159.81	197.49	192.3	134.03	208.56	196.036	178.296	0.152384	0.814397	0.639235	0.263347	1.68855e-08	1.00686e-08	0.559224	1.66728e-26	6.50708e-27	-0.384105	2.6259e-12	1.16711e-12	K03029//26S proteasome regulatory subunit N10+ko03050//Proteasome	XP_714273.1|6.7e-153|proteasome regulatory particle base subunit [Candida albicans SC5314]	GO:0043632//modification-dependent macromolecule catabolic process;GO:0043933//protein-containing complex subunit organization;GO:0006508//proteolysis;GO:0065003//protein-containing complex assembly;GO:1901565//organonitrogen compound catabolic process;GO:0071704//organic substance metabolic process;GO:0016043//cellular component organization;GO:0009057//macromolecule catabolic process;GO:0030163…
3642347	3642347	XM_710969.2	Known_gene	1	1671420	1672556	NC_032090.1	-	1137	1137	118.98	115.86	65.14	67.8	69.4	77.34	99.993	71.513	0.495519	0.402683	0.183141	0.811362	6.58193e-43	2.08964e-43	-0.0913919	0.250219	0.226066	0.583096	7.38321e-26	2.30392e-26	K02218//casein kinase 1 [EC:2.7.11.1]+ko04011//MAPK signaling pathway - yeast+ko04392//Hippo signaling pathway - multiple species	XP_716062.2|1.6e-221|casein kinase [Candida albicans SC5314]	GO:0006807//nitrogen compound metabolic process;GO:0019538//protein metabolic process;GO:0006464//cellular protein modification process;GO:0036211//protein modification process;GO:1901564//organonitrogen compound metabolic process;GO:0006468//protein phosphorylation;GO:0044267//cellular protein metabolic process;GO:0044237//cellular metabolic process;GO:0044238//primary metabolic process;GO:00431…
3634915	3634915	BGI_novel_T000030,XM_718349.2	Known_gene	2	1960295	1961950	NC_032089.1	+	1656	1656	3.12	3.73	8.27	3.3	3.18	3.47	5.04	3.316	0.491943	0.50222	0.262857	-0.08092	0.764674	0.74137	1.37886	4.30957e-11	2.40092e-11	0.10424	0.762825	0.737316	NA	XP_723442.2|0.0e+00|hypothetical protein CAALFM_C109000WA [Candida albicans SC5314]	GO:0016020//membrane;GO:0110165//cellular anatomical entity;GO:0016021//integral component of membrane;GO:0031224//intrinsic component of membrane;
3646359	TEF4	XM_706941.1	Known_gene	1	741739	742398	NC_032093.1	+	660	660	10.36	9.3	5.93	7.61	12.08	13.64	8.53	11.11	-0.295219	0.727555	0.523593	0.445056	0.10355	0.0880486	-1.02652	0.000300922	0.00021946	-0.552541	0.0363448	0.028222	K03233//elongation factor 1-gamma	XP_712034.1|4.1e-121|Tef4p [Candida albicans SC5314]	GO:0034645//cellular macromolecule biosynthetic process;GO:1901566//organonitrogen compound biosynthetic process;GO:0006412//translation;GO:0008152//metabolic process;GO:1901576//organic substance biosynthetic process;GO:0044267//cellular protein metabolic process;GO:0009059//macromolecule biosynthetic process;GO:1901564//organonitrogen compound metabolic process;GO:0034641//cellular nitrogen com…
3646134	ATP1	XM_019475100.1	Known_gene	1	949329	951471	NC_032089.1	+	2143	1641	225.01	233.93	1445.9	427.03	342.97	214.62	634.946	328.206	0.719026	0.406	0.185461	-0.924348	3.82004e-281	3.85074e-282	2.07581	0	0	0.124292	6.55497e-06	3.79794e-06	K02132//F-type H+-transporting ATPase subunit alpha+ko01100//Metabolic pathways+ko00190//Oxidative phosphorylation	XP_019330645.1|1.8e-303|F1F0 ATP synthase subunit alpha [Candida albicans SC5314]	GO:0044238//primary metabolic process;GO:0006796//phosphate-containing compound metabolic process;GO:0006810//transport;GO:1901566//organonitrogen compound biosynthetic process;GO:0051234//establishment of localization;GO:0072521//purine-containing compound metabolic process;GO:0009142//nucleoside triphosphate biosynthetic process;GO:0055086//nucleobase-containing small molecule metabolic process…
3638973	FAA4	XM_714261.1	Known_gene	1	2172466	2174556	NC_032096.1	+	2091	2091	153.14	254.26	458.12	1180.86	1265.65	1079.45	288.506	1175.32	-1.92556	1.88745e-05	3.89618e-07	-2.94691	0	0	-1.46608	0	0	-2.08592	0	0	K01897//long-chain acyl-CoA synthetase [EC:6.2.1.3]+ko04146//Peroxisome+ko01100//Metabolic pathways+ko00061//Fatty acid biosynthesis+ko01212//Fatty acid metabolism+ko00071//Fatty acid degradation	XP_719354.1|0.0e+00|long-chain fatty acid-CoA ligase [Candida albicans SC5314]	GO:0015908//fatty acid transport;GO:0006869//lipid transport;GO:0015711//organic anion transport;GO:0051179//localization;GO:0015909//long-chain fatty acid transport;GO:0044539//long-chain fatty acid import into cell;GO:0015718//monocarboxylic acid transport;GO:0098657//import into cell;GO:0051234//establishment of localization;GO:0071702//organic substance transport;GO:0046942//carboxylic acid t…
3642013	3642013	XM_711197.2	Known_gene	1	2704534	2707485	NC_032089.1	+	2952	2952	12.67	15.61	5.22	13.52	16.77	18.21	11.166	16.166	-0.434049	0.571143	0.330126	-0.0936786	0.340396	0.309218	-1.68376	1.76225e-51	4.56748e-52	-0.22226	0.0115659	0.00850676	K11294//nucleolin	XP_716290.2|0.0e+00|hypothetical protein CAALFM_C112430WA [Candida albicans SC5314]	GO:0071555//cell wall organization;GO:0071840//cellular component organization or biogenesis;GO:0050789//regulation of biological process;GO:0007010//cytoskeleton organization;GO:0038203//TORC2 signaling;GO:0031929//TOR signaling;GO:0035556//intracellular signal transduction;GO:0050896//response to stimulus;GO:0030952//establishment or maintenance of cytoskeleton polarity;GO:0007165//signal trans…
3641893	CHS2	XM_711340.1	Known_gene	1	1926708	1929737	NC_032096.1	-	3030	3030	259.42	150.43	153.01	172.89	199.02	230.23	187.62	200.713	-0.0669738	0.934064	0.851792	0.585435	1.77963e-149	2.75944e-150	-0.379287	5.52481e-50	1.46701e-50	-0.613984	1.26972e-138	1.43166e-139	K00698//chitin synthase [EC:2.4.1.16]+ko00520//Amino sugar and nucleotide sugar metabolism	XP_716433.1|0.0e+00|chitin synthase [Candida albicans SC5314]	GO:0071840//cellular component organization or biogenesis;GO:0009058//biosynthetic process;GO:0006040//amino sugar metabolic process;GO:0043170//macromolecule metabolic process;GO:0046349//amino sugar biosynthetic process;GO:0006023//aminoglycan biosynthetic process;GO:1901566//organonitrogen compound biosynthetic process;GO:0006037//cell wall chitin metabolic process;GO:1901564//organonitrogen c…
3645451	SUV3	XM_707851.2	Known_gene	1	908645	910807	NC_032090.1	-	2163	2163	60.07	103	85.04	108.68	104.87	106.15	82.703	106.566	-0.339655	0.530587	0.29109	-0.85537	1.11884e-85	2.44864e-86	-0.302389	5.61618e-13	2.94784e-13	-0.04346	0.45112	0.410564	K17675//ATP-dependent RNA helicase SUPV3L1/SUV3 [EC:3.6.4.13]	XP_712944.2|0.0e+00|ATP-dependent RNA helicase [Candida albicans SC5314]	GO:0010467//gene expression;GO:0042493//response to drug;GO:0044237//cellular metabolic process;GO:0055114//oxidation-reduction process;GO:0030447//filamentous growth;GO:0090304//nucleic acid metabolic process;GO:0009060//aerobic respiration;GO:0044260//cellular macromolecule metabolic process;GO:0006725//cellular aromatic compound metabolic process;GO:0090609//single-species submerged biofilm fo…
3648426	3648426	XM_704883.2	Known_gene	1	765465	766517	NC_032089.1	+	1053	1053	49.2	36.67	66.38	38.99	30.5	28.7	50.75	32.73	0.591314	0.232232	0.0726811	0.335554	0.000199786	0.000139536	1.12194	3.79075e-37	1.21167e-37	0.35355	0.00030905	0.000197395	NA	XP_709975.2|3.6e-204|hypothetical protein CAALFM_C103690WA [Candida albicans SC5314]	GO:0071840//cellular component organization or biogenesis;GO:0016043//cellular component organization;GO:0010256//endomembrane system organization;GO:0006996//organelle organization;GO:0009987//cellular process;GO:0007030//Golgi organization;GO:0005737//cytoplasm;GO:0005794//Golgi apparatus;GO:0005622//intracellular;GO:0043229//intracellular organelle;GO:0043226//organelle;GO:0012505//endomembran…
3639731	3639731	XM_713591.1	Known_gene	1	28507	30687	NC_032096.1	+	2181	2181	225.75	120.99	96.07	76.61	88.56	61.1	147.603	75.423	0.920676	0.117893	0.0255047	1.55912	0	0	0.117431	0.00423657	0.0032878	0.985644	3.35231e-124	4.0221e-125	NA	XP_718684.1|0.0e+00|hypothetical protein CAALFM_CR00110WA [Candida albicans SC5314]	GO:0042221//response to chemical;GO:0071496//cellular response to external stimulus;GO:0010605//negative regulation of macromolecule metabolic process;GO:2000113//negative regulation of cellular macromolecule biosynthetic process;GO:0051253//negative regulation of RNA metabolic process;GO:0060255//regulation of macromolecule metabolic process;GO:0031670//cellular response to nutrient;GO:0080090//…
3638388	3638388	XM_714898.1	Known_gene	1	622956	624053	NC_032091.1	+	1098	1098	146.98	96.73	45.09	57.9	38.54	50.37	96.266	48.936	0.935266	0.153413	0.0383976	1.34398	6.53557e-114	1.2235e-114	0.226451	0.0111289	0.00885036	0.941399	1.61772e-45	3.73508e-46	NA	XP_719979.2|9.2e-211|hypothetical protein CAALFM_C302900WA [Candida albicans SC5314]	NA
3646028	3646028	XM_707257.2	Known_gene	1	1579345	1581459	NC_032096.1	-	2115	2115	168.34	93.26	56.63	56.09	56.56	60.31	106.076	57.653	0.845626	0.179878	0.0491692	1.58556	0	0	0.00178441	0.922063	0.915904	0.628861	4.12297e-44	9.7064e-45	K19069//cellobiose dehydrogenase (acceptor) [EC:1.1.99.18]	XP_712350.2|0.0e+00|hypothetical protein CAALFM_CR07250CA [Candida albicans SC5314]	GO:1901265//nucleoside phosphate binding;GO:0097159//organic cyclic compound binding;GO:0003824//catalytic activity;GO:0005488//binding;GO:0036094//small molecule binding;GO:0000166//nucleotide binding;GO:0016899//oxidoreductase activity, acting on the CH-OH group of donors, oxygen as acceptor;GO:0050660//flavin adenine dinucleotide binding;GO:0016614//oxidoreductase activity, acting on CH-OH gro…
30515077	DAD1	XM_019475183.1	Known_gene	1	3013321	3013620	NC_032089.1	-	300	300	68.71	26.67	23.97	29.95	19.88	39.71	39.783	29.846	0.433253	0.631706	0.400561	1.19796	1.41974e-08	8.42998e-09	0.269912	0.332017	0.305624	-0.574285	0.0944098	0.0767526	K11553//DASH complex subunit DAD1	XP_019330728.1|5.5e-49|Dad1p [Candida albicans SC5314]	GO:0006996//organelle organization;GO:1903047//mitotic cell cycle process;GO:0007051//spindle organization;GO:0071840//cellular component organization or biogenesis;GO:0016043//cellular component organization;GO:0007010//cytoskeleton organization;GO:0007017//microtubule-based process;GO:0009987//cellular process;GO:0022402//cell cycle process;GO:0000278//mitotic cell cycle;GO:0000226//microtubule…
3640580	IFF11	XM_712681.1	Known_gene	1	95652	97187	NC_032091.1	+	1536	1536	0	0.11	0.35	0.26	0.1	0.15	0.153	0.17	-0.108942	0.946164	0.88379	-4.70044	0.0424399	0.0345588	1.80735	0.151609	0.133405	-0.447459	0.815906	0.793832	K19900//hyphal wall protein	KGR12455.1|1.9e-294|hypothetical protein MG3_02532 [Candida albicans P78048]	NA
3643913	ERG9	XM_709367.2	Known_gene	1	1751816	1753162	NC_032090.1	+	1347	1347	9.37	14.6	37.23	27.89	23.98	19.64	20.4	23.836	-0.254037	0.764619	0.571396	-1.57363	2.35737e-35	8.24212e-36	0.634634	1.79865e-11	9.9094e-12	-0.427827	0.00141605	0.000951094	K00801//farnesyl-diphosphate farnesyltransferase [EC:2.5.1.21]+ko00909//Sesquiterpenoid and triterpenoid biosynthesis+ko01100//Metabolic pathways+ko01130//Biosynthesis of antibiotics+ko01110//Biosynthesis of secondary metabolites+ko00100//Steroid biosynthesis	XP_714460.2|4.5e-260|bifunctional farnesyl-diphosphate farnesyltransferase/squalene synthase [Candida albicans SC5314]	GO:0009058//biosynthetic process;GO:0071704//organic substance metabolic process;GO:0044238//primary metabolic process;GO:0044237//cellular metabolic process;GO:1901360//organic cyclic compound metabolic process;GO:0044255//cellular lipid metabolic process;GO:0097384//cellular lipid biosynthetic process;GO:0006066//alcohol metabolic process;GO:0006720//isoprenoid metabolic process;GO:1901617//org…
3647449	3647449	XM_705849.1	Known_gene	1	1782289	1783212	NC_032091.1	+	924	924	1.93	5.61	1.29	1.37	0.9	3.6	2.943	1.956	0.51253	0.659858	0.432957	0.494425	0.370973	0.339044	0.519374	0.403225	0.375616	0.640004	0.0293612	0.0225624	K16329//pseudouridylate synthase [EC:4.2.1.70]+ko00240//Pyrimidine metabolism;K16330//pseudouridylate synthase / pseudouridine kinase [EC:4.2.1.70 2.7.1.83]+ko00240//Pyrimidine metabolism	XP_710941.1|2.5e-169|hypothetical protein CAALFM_C307910WA [Candida albicans SC5314]	GO:0003824//catalytic activity;GO:0016798//hydrolase activity, acting on glycosyl bonds;GO:0016787//hydrolase activity;
3644452	3644452	XM_708845.2	Known_gene	1	2399586	2401076	NC_032089.1	-	1491	1491	192.48	173.97	144.82	314.8	246.45	246.03	170.423	269.093	-0.603021	0.203398	0.0590861	-0.709727	2.31577e-119	4.21508e-120	-0.767034	2.85104e-101	4.56128e-102	-0.499996	9.70294e-47	2.20766e-47	K01228//mannosyl-oligosaccharide glucosidase [EC:3.2.1.106]+ko04141//Protein processing in endoplasmic reticulum+ko01100//Metabolic pathways+ko00510//N-Glycan biosynthesis	XP_713938.2|5.5e-291|hypothetical protein CAALFM_C110840CA [Candida albicans SC5314]	GO:0016192//vesicle-mediated transport;GO:0009987//cellular process;GO:0051641//cellular localization;GO:0006810//transport;GO:0042147//retrograde transport, endosome to Golgi;GO:0051234//establishment of localization;GO:0051179//localization;GO:0016197//endosomal transport;GO:0016482//cytosolic transport;GO:0051649//establishment of localization in cell;GO:0046907//intracellular transport;GO:004…
3645377	RBT1	XM_704874.2	Known_gene	1	745166	747331	NC_032092.1	-	2166	2166	1.86	2.51	2.71	1.18	2.16	1.29	2.36	1.543	0.540058	0.478081	0.241468	0.656516	0.0533146	0.0439676	0.327262	0.216462	0.193761	0.960316	0.00127839	0.000855196	K19900//hyphal wall protein	XP_709966.2|0.0e+00|Rbt1p [Candida albicans SC5314]	GO:0071840//cellular component organization or biogenesis;GO:0009405//pathogenesis;GO:0045229//external encapsulating structure organization;GO:0016043//cellular component organization;GO:0009987//cellular process;GO:0071852//fungal-type cell wall organization or biogenesis;GO:0071555//cell wall organization;GO:0031505//fungal-type cell wall organization;GO:0071554//cell wall organization or biog…
3637817	3637817	XM_715537.2	Known_gene	1	660366	660920	NC_032093.1	+	555	555	35.55	42.43	107.68	35.04	28.8	56.98	61.886	40.273	0.53477	0.460564	0.227355	0.0208468	0.906908	0.893544	1.90261	3.13784e-59	7.42014e-60	-0.425371	0.00395594	0.00278066	K18160//NADH dehydrogenase [ubiquinone] 1 alpha subcomplex assembly factor 2	XP_720630.1|2.5e-103|hypothetical protein CAALFM_C502990WA [Candida albicans SC5314]	GO:0009987//cellular process;GO:0006091//generation of precursor metabolites and energy;GO:0045333//cellular respiration;GO:0055114//oxidation-reduction process;GO:0044237//cellular metabolic process;GO:0008152//metabolic process;GO:0015980//energy derivation by oxidation of organic compounds;GO:0110165//cellular anatomical entity;GO:0016020//membrane;GO:0016651//oxidoreductase activity, acting o…
3640100	PRS	XM_713108.2	Known_gene	1	342520	344247	NC_032096.1	+	1728	1728	32.44	35.66	60.2	16.32	17.27	25.8	42.766	19.796	1.03307	0.0268966	0.00290145	0.991133	9.1562e-27	3.67812e-27	1.8015	5.19996e-116	7.43348e-117	0.466936	3.57301e-09	1.776e-09	K01881//prolyl-tRNA synthetase [EC:6.1.1.15]+ko00970//Aminoacyl-tRNA biosynthesis	XP_718201.2|0.0e+00|putative proline--tRNA ligase [Candida albicans SC5314]	GO:0009059//macromolecule biosynthetic process;GO:0043043//peptide biosynthetic process;GO:0034660//ncRNA metabolic process;GO:0009987//cellular process;GO:0044237//cellular metabolic process;GO:0044281//small molecule metabolic process;GO:0034641//cellular nitrogen compound metabolic process;GO:0044249//cellular biosynthetic process;GO:0043039//tRNA aminoacylation;GO:0006399//tRNA metabolic proc…
3648225	3648225	XM_705081.1	Known_gene	1	1553189	1554349	NC_032096.1	-	1161	1161	94.15	52.89	38.02	25.85	45.82	37.24	61.686	36.303	0.7334	0.267801	0.0912707	1.8648	3.95061e-125	6.91952e-126	-0.269219	0.00337257	0.00260152	0.506142	2.86561e-10	1.36178e-10	K05747//Wiskott-Aldrich syndrome protein+ko04144//Endocytosis	XP_710173.1|2.0e-224|hypothetical protein CAALFM_CR07120CA [Candida albicans SC5314]	GO:0016020//membrane;GO:0110165//cellular anatomical entity;GO:0016021//integral component of membrane;GO:0031224//intrinsic component of membrane;
3643009	3643009	XM_710288.1	Known_gene	1	536192	536950	NC_032090.1	+	759	759	51.87	50.2	34.98	50.7	57.12	79.6	45.683	62.473	-0.379425	0.543242	0.302367	0.0329146	0.769455	0.746392	-0.707466	2.37552e-10	1.34882e-10	-0.665081	4.32943e-12	1.93809e-12	NA	XP_715381.1|2.6e-135|hypothetical protein CAALFM_C202660WA [Candida albicans SC5314]	NA
3642266	ALS6	XM_710986.2,BGI_novel_T000125	Known_gene	2	1407764	1411864	NC_032091.1	-	4101	4101	12.58	18.8	35.62	24.04	61.53	41.27	22.333	42.28	-0.871802	0.17427	0.046795	-0.934305	9.1029e-43	2.8961e-43	-0.788602	2.71186e-77	5.3576e-78	-1.13436	4.71346e-96	6.7007e-97	K22493//agglutinin-like protein;K22493//agglutinin-like protein	XP_716079.2|0.0e+00|Als6p [Candida albicans SC5314]	GO:0007160//cell-matrix adhesion;GO:0098609//cell-cell adhesion;GO:0009405//pathogenesis;GO:0043709//cell adhesion involved in single-species biofilm formation;GO:0090608//multi-species submerged biofilm formation;GO:0044419//interspecies interaction between organisms;GO:0009987//cellular process;GO:0044403//symbiotic process;GO:0043710//cell adhesion involved in multi-species biofilm formation;G…
3647856	3647856	XM_705453.2	Known_gene	1	822133	823599	NC_032092.1	+	1467	1467	3.75	3.88	4.44	3.95	2.64	3.36	4.023	3.316	0.263888	0.722882	0.515296	-0.0749621	0.780238	0.757374	0.750022	0.00564116	0.00440704	0.207595	0.410938	0.37068	K09291//nucleoprotein TPR+ko03013//RNA transport;K20361//intracellular protein transport protein USO1	XP_710545.1|4.2e-283|hypothetical protein CAALFM_C403880WA [Candida albicans SC5314]	NA
3639275	3639275	XM_714061.2	Known_gene	1	648469	650490	NC_032094.1	+	2022	2022	0.16	0.04	0.26	1.31	0.58	0.56	0.153	0.816	-1.71092	0.0752608	0.0125414	-3.03342	8.91491e-07	5.65616e-07	-1.15754	0.104243	0.0900894	-3.80735	0.000933976	0.00061789	NA	XP_719154.2|0.0e+00|hypothetical protein CAALFM_C603090WA [Candida albicans SC5314]	NA
3642806	SEC3	XM_710474.2	Known_gene	1	1393150	1395522	NC_032092.1	-	2373	2373	99.83	70.34	54.77	80.17	70.64	72.75	74.98	74.52	0.0389594	0.961935	0.913153	0.316411	1.65476e-15	8.17682e-16	-0.367099	7.10038e-14	3.63082e-14	-0.0486019	0.43153	0.39114	K19983//exocyst complex component 1	XP_715567.2|0.0e+00|GTP-Rho binding exocyst subunit [Candida albicans SC5314]	GO:0070727//cellular macromolecule localization;GO:0016192//vesicle-mediated transport;GO:0008104//protein localization;GO:0048193//Golgi vesicle transport;GO:0036180//filamentous growth of a population of unicellular organisms in response to biotic stimulus;GO:0007163//establishment or maintenance of cell polarity;GO:0033036//macromolecule localization;GO:0044182//filamentous growth of a populat…
3636810	BMH1	XM_716419.1	Known_gene	1	675074	675868	NC_032089.1	-	795	795	632.61	622.45	950.42	668.21	639.24	600.29	735.16	635.913	0.197633	0.696201	0.481442	-0.0789852	0.00404929	0.00304578	0.572208	4.44318e-119	6.21066e-120	0.0522983	0.00200077	0.00136534	K06630//14-3-3 protein epsilon+ko04011//MAPK signaling pathway - yeast	XP_721512.1|3.9e-142|14-3-3 family protein [Candida albicans SC5314]	GO:0050789//regulation of biological process;GO:0009266//response to temperature stimulus;GO:0033554//cellular response to stress;GO:0048584//positive regulation of response to stimulus;GO:0009405//pathogenesis;GO:0040007//growth;GO:0045927//positive regulation of growth;GO:1900428//regulation of filamentous growth of a population of unicellular organisms;GO:0030435//sporulation resulting in form…
3639487	3639487	XM_713692.2	Known_gene	1	1516783	1517724	NC_032089.1	-	942	942	13.76	10.73	14.23	5.83	6.68	6.62	12.906	6.376	0.96196	0.0566184	0.00828494	1.23891	4.30664e-09	2.50812e-09	1.09102	8.68451e-08	5.37488e-08	0.696747	0.00103011	0.000684434	NA	XP_718785.2|1.7e-173|hypothetical protein CAALFM_C107100CA [Candida albicans SC5314]	NA
3636643	3636643	XM_716612.2	Known_gene	1	472269	473408	NC_032091.1	-	1140	1140	50.56	72.19	103.2	106.75	114.73	103.87	75.316	108.45	-0.51503	0.30436	0.112989	-1.07817	1.88892e-61	5.00064e-62	-0.1528	0.00946079	0.00748742	-0.524908	1.54876e-16	6.0821e-17	K00809//deoxyhypusine synthase [EC:2.5.1.46]	XP_721705.2|8.1e-218|deoxyhypusine synthase [Candida albicans SC5314]	GO:0006464//cellular protein modification process;GO:0019538//protein metabolic process;GO:0071704//organic substance metabolic process;GO:0051604//protein maturation;GO:0009058//biosynthetic process;GO:0018205//peptidyl-lysine modification;GO:0009987//cellular process;GO:0010467//gene expression;GO:0044238//primary metabolic process;GO:0044260//cellular macromolecule metabolic process;GO:0043170…
3643924	GPD1	XM_709309.2	Known_gene	1	2107703	2108914	NC_032090.1	+	1212	1212	361.47	482.08	349.19	538.96	681.74	276.05	397.58	498.916	-0.28672	0.693595	0.477253	-0.576302	4.53764e-112	8.59356e-113	-0.965209	0	0	0.804343	9.44216e-190	8.52032e-191	K00006//glycerol-3-phosphate dehydrogenase (NAD+) [EC:1.1.1.8]+ko04011//MAPK signaling pathway - yeast+ko01110//Biosynthesis of secondary metabolites+ko00564//Glycerophospholipid metabolism	XP_714402.1|5.4e-228|glycerol-3-phosphate dehydrogenase (NAD(+)) [Candida albicans SC5314]	GO:0046434//organophosphate catabolic process;GO:0006734//NADH metabolic process;GO:0007155//cell adhesion;GO:0005975//carbohydrate metabolic process;GO:0046168//glycerol-3-phosphate catabolic process;GO:0044238//primary metabolic process;GO:0009056//catabolic process;GO:0031589//cell-substrate adhesion;GO:0022610//biological adhesion;GO:0006796//phosphate-containing compound metabolic process;GO…
3645869	3645869	XM_707413.2	Known_gene	1	466317	467456	NC_032094.1	+	1140	1140	5.51	6.61	19.33	13.2	14.06	12.96	10.483	13.406	-0.368921	0.646061	0.416331	-1.26041	7.23846e-11	4.02406e-11	0.459245	0.0010748	0.000806102	-0.971344	4.86208e-07	2.65858e-07	K02427//23S rRNA (uridine2552-2'-O)-methyltransferase [EC:2.1.1.166];K15508//21S rRNA (uridine2791-2'-O)-methyltransferase [EC:2.1.1.168]	XP_712506.1|5.4e-222|hypothetical protein CAALFM_C602250WA [Candida albicans SC5314]	GO:0009059//macromolecule biosynthetic process;GO:0006412//translation;GO:0044237//cellular metabolic process;GO:0043414//macromolecule methylation;GO:0030488//tRNA methylation;GO:0043412//macromolecule modification;GO:0034641//cellular nitrogen compound metabolic process;GO:0016070//RNA metabolic process;GO:0006396//RNA processing;GO:0006518//peptide metabolic process;GO:0090304//nucleic acid me…
3642344	3642344	XM_710966.2	Known_gene	1	1665658	1669284	NC_032090.1	+	3627	3627	13.08	16.27	20.11	39.28	65.62	34.97	16.486	46.623	-1.42507	0.00163392	8.0513e-05	-1.58643	1.88358e-141	3.03102e-142	-1.70622	2.22093e-249	1.62453e-250	-1.1039	9.52296e-71	1.66904e-71	K07497//putative transposase	XP_716059.2|0.0e+00|hypothetical protein CAALFM_C208240WA [Candida albicans SC5314]	GO:0071704//organic substance metabolic process;GO:0009987//cellular process;GO:0006259//DNA metabolic process;GO:0008152//metabolic process;GO:0090304//nucleic acid metabolic process;GO:0006725//cellular aromatic compound metabolic process;GO:0043170//macromolecule metabolic process;GO:0006807//nitrogen compound metabolic process;GO:0015074//DNA integration;GO:0044238//primary metabolic process;…
3646979	LAP4	XM_706331.1	Known_gene	1	801071	802807	NC_032093.1	+	1737	1737	38.86	27.38	18.86	18.82	13.89	12.63	28.366	15.113	0.873921	0.130361	0.0294489	1.04602	9.27878e-35	3.27212e-35	0.441283	8.41781e-05	5.96332e-05	1.11627	3.83588e-28	1.14799e-28	K01268//aminopeptidase I [EC:3.4.11.22]	XP_711423.1|0.0e+00|Lap4p [Candida albicans SC5314]	GO:0009987//cellular process;GO:0044260//cellular macromolecule metabolic process;GO:1901575//organic substance catabolic process;GO:0009057//macromolecule catabolic process;GO:0019538//protein metabolic process;GO:0007039//protein catabolic process in the vacuole;GO:0044238//primary metabolic process;GO:1901564//organonitrogen compound metabolic process;GO:0006807//nitrogen compound metabolic pr…
3640153	PRK1	XM_713177.2	Known_gene	1	447150	449222	NC_032096.1	+	2073	2073	82.74	81.62	70.93	66.87	67.07	80.32	78.43	71.42	0.149822	0.795696	0.615681	0.307226	6.04245e-11	3.35208e-11	0.0807283	0.0970666	0.0836932	0.0231634	0.464667	0.42383	K08853//AP2-associated kinase [EC:2.7.11.1]	XP_718270.2|0.0e+00|serine/threonine protein kinase [Candida albicans SC5314]	GO:0044238//primary metabolic process;GO:0000147//actin cortical patch assembly;GO:0016043//cellular component organization;GO:0016310//phosphorylation;GO:0019538//protein metabolic process;GO:0006793//phosphorus metabolic process;GO:0030036//actin cytoskeleton organization;GO:0044260//cellular macromolecule metabolic process;GO:0036211//protein modification process;GO:0044237//cellular metabolic…
3642911	RPT5	XM_710339.2	Known_gene	1	1532681	1533973	NC_032092.1	+	1293	1293	209.02	221.31	163.33	184.48	153.98	205.6	197.886	181.353	0.151448	0.813799	0.638359	0.180177	1.77814e-06	1.14245e-06	0.0850468	0.034438	0.0286178	0.106228	0.000522389	0.00034033	K03065//26S proteasome regulatory subunit T5+ko03050//Proteasome	XP_715432.2|5.5e-239|proteasome regulatory particle base subunit [Candida albicans SC5314]	GO:0044267//cellular protein metabolic process;GO:0009056//catabolic process;GO:0048522//positive regulation of cellular process;GO:1903506//regulation of nucleic acid-templated transcription;GO:0060260//regulation of transcription initiation from RNA polymerase II promoter;GO:1901565//organonitrogen compound catabolic process;GO:0045898//regulation of RNA polymerase II transcription preinitiatio…
3638799	CKB1	XM_714455.1	Known_gene	1	37264	38145	NC_032090.1	-	882	882	148.67	122.15	127.62	202.02	166.74	179.81	132.813	182.856	-0.420368	0.366973	0.154305	-0.442385	3.72196e-19	1.71265e-19	-0.385746	1.08885e-11	5.96066e-12	-0.557819	1.24731e-22	4.19822e-23	K03115//casein kinase II subunit beta+ko04139//Mitophagy - yeast+ko03008//Ribosome biogenesis in eukaryotes	XP_719548.1|3.0e-172|casein kinase 2 regulatory subunit [Candida albicans SC5314]	GO:0071704//organic substance metabolic process;GO:0043170//macromolecule metabolic process;GO:0018209//peptidyl-serine modification;GO:1903506//regulation of nucleic acid-templated transcription;GO:0050896//response to stimulus;GO:0044237//cellular metabolic process;GO:0010468//regulation of gene expression;GO:2001141//regulation of RNA biosynthetic process;GO:0016310//phosphorylation;GO:0006356…
3645659	HTB1	XM_707633.1	Known_gene	1	817866	818258	NC_032091.1	-	393	393	194.01	133	201.27	322	254.08	219.66	176.093	265.246	-0.535952	0.273124	0.0943459	-0.73093	5.87167e-25	2.42064e-25	-0.336151	7.46171e-05	5.27354e-05	-0.723846	1.58438e-13	6.79972e-14	K11252//histone H2B	XP_712726.1|6.1e-64|histone H2B [Candida albicans SC5314]	GO:0022607//cellular component assembly;GO:0006996//organelle organization;GO:0071824//protein-DNA complex subunit organization;GO:0034622//cellular protein-containing complex assembly;GO:0044085//cellular component biogenesis;GO:0065003//protein-containing complex assembly;GO:0006325//chromatin organization;GO:0043933//protein-containing complex subunit organization;GO:0006323//DNA packaging;GO:…
3647674	APN2	XM_705628.2	Known_gene	1	2360939	2362294	NC_032089.1	+	1356	1356	9.36	13.47	33.16	14.56	28.55	36.5	18.663	26.536	-0.494893	0.532512	0.292895	-0.63743	2.37693e-05	1.59882e-05	0.215953	0.020032	0.0162651	-1.43815	5.28703e-39	1.34064e-39	K10772//AP endonuclease 2 [EC:4.2.99.18]+ko03410//Base excision repair	XP_710720.2|3.4e-263|DNA-(apurinic or apyrimidinic site) lyase [Candida albicans SC5314]	GO:0006281//DNA repair;GO:0006259//DNA metabolic process;GO:0044237//cellular metabolic process;GO:0006807//nitrogen compound metabolic process;GO:0046483//heterocycle metabolic process;GO:0006974//cellular response to DNA damage stimulus;GO:0034641//cellular nitrogen compound metabolic process;GO:1901360//organic cyclic compound metabolic process;GO:0008152//metabolic process;GO:0006950//respons…
3639506	3639506	XM_713731.2	Known_gene	1	1442282	1442668	NC_032089.1	+	387	387	62.95	89.97	51.71	27.54	30.5	36.59	68.21	31.543	1.09999	0.0488372	0.00665039	1.19268	1.69594e-11	9.26632e-12	0.761634	2.04466e-05	1.40442e-05	1.29799	3.01357e-21	1.04976e-21	NA	XP_718824.2|2.4e-65|hypothetical protein CAALFM_C106750WA [Candida albicans SC5314]	NA
30515015	MMD1	XM_019475121.1	Known_gene	1	1469637	1470274	NC_032089.1	-	638	471	11.76	12.55	230.04	54.08	44	6.23	84.783	34.77	0.805984	0.477964	0.24125	-2.20121	1.56343e-29	5.98722e-30	2.38631	1.20819e-132	1.54151e-133	1.01038	0.00121639	0.000812902	K09022//2-iminobutanoate/2-iminopropanoate deaminase [EC:3.5.99.10];K06965//protein pelota+ko03015//mRNA surveillance pathway	XP_019330666.1|5.0e-81|isoleucine biosynthesis protein [Candida albicans SC5314]	GO:0009056//catabolic process;GO:0008152//metabolic process;GO:1901565//organonitrogen compound catabolic process;GO:0006807//nitrogen compound metabolic process;GO:0071704//organic substance metabolic process;GO:1901564//organonitrogen compound metabolic process;GO:1901575//organic substance catabolic process;GO:0005622//intracellular;GO:0043229//intracellular organelle;GO:0043227//membrane-boun…
[truncated: 5,497 more rows]
