# Supplementary material for: The Antimicrobial Peptide AMP-17 Derived from Musca domestica Inhibits Biofilm Formation and Eradicates Mature Biofilm in Candida albicans
Source: Antibiotics (Basel). 2022 Oct 25;11(11):1474. doi: 10.3390/antibiotics11111474 (PMC9686669; doi:10.3390/antibiotics11111474)
Supplement: Supplementary file 1 [file antibiotics-11-01474-s001.zip › Talble S6. the DEGs drived from geen network using Clugo of cytoscape.xlsx]

## Sheet: ClueGO Results
ID	Term	Ontology Source	Term PValue	Term PValue Corrected with Bonferroni step down	Group PValue	Group PValue Corrected with Bonferroni step down	GOLevels	GOGroups	% Associated Genes	Nr. Genes	Associated Genes Found
GO:0034637	cellular carbohydrate biosynthetic process	GO_BiologicalProcess-EBI-UniProt-GOA_25.11.2019_00h00	4.37473e-05	0.00419974	4.37473e-05	0.000174989	[4, 5]	Group0	19.2308	10	[FBP1, FUN31, KRE62, MNN22, MNN24, PHR2, SKN1, TPS1, TPS2, TPS3]
KEGG:00640	Propanoate metabolism	KEGG_25.11.2019	8.38113e-05	0.00754301	8.38113e-05	0.000251434	[-1]	Group1	31.5789	6	[EHD3, ERG10, HPD1, LSC1, PXP2, UGA11]
GO:0019752	carboxylic acid metabolic process	GO_BiologicalProcess-EBI-UniProt-GOA_25.11.2019_00h00	9.90611e-05	0.00861831	9.90611e-05	0.000198122	[5]	Group2	8.78788	29	[AAT21, ACH1, ARA1, ARO10, ARO9, CAR2, CAT2, CPA2, CYB2, DAO2, DQD1, EHD3, ERG10, FUM12, GAL4, GRS1, HIS4, HOM3, HPD1, IDP1, IDP2, LSC1, LYS1, MET3, PEX7, PRO2, PRS, PXP2, UGA11]
GO:0020012	evasion or tolerance of host immune response	GO_BiologicalProcess-EBI-UniProt-GOA_25.11.2019_00h00	0.000117044	0.0100657	0.000117044	0.000117044	[6, 8]	Group3	38.4615	5	[CPH1, EFG1, FBP1, SAP4, SSK1]
GO:0009277	fungal-type cell wall	GO_CellularComponent-EBI-UniProt-GOA_25.11.2019_00h00	2.58251e-05	0.00250503	2.58251e-05	0.000129125	[4, 5]	Group4	11.6279	20	[ALS3, CSA1, DSE1, ECE1, FBP1, GPH1, HWP1, HYR4, PGA10, PGA62, PHO114, PHR2, PIR1, RHD3, SAP3, SAP4, SAP5, SOD4, TSA1, WSC1]
GO:0030446	hyphal cell wall	GO_CellularComponent-EBI-UniProt-GOA_25.11.2019_00h00	0.000186553	0.0156705	2.58251e-05	0.000129125	[5, 6]	Group4	15.0685	11	[ALS3, CSA1, ECE1, FBP1, GPH1, HWP1, PGA62, PHR2, RHD3, SOD4, TSA1]
GO:1900190	regulation of single-species biofilm formation	GO_BiologicalProcess-EBI-UniProt-GOA_25.11.2019_00h00	4.66731e-05	0.00438727	9.33467e-07	5.6008e-06	[3, 4, 5]	Group5	17.4603	11	[ACE2, CPH1, DEF1, EFG1, FCR3, RHB1, ROB1, TEC1, TPK1, TRY4, TRY5]
GO:0043565	sequence-specific DNA binding	GO_MolecularFunction-EBI-UniProt-GOA_25.11.2019_00h00	5.56605e-05	0.00517643	9.33467e-07	5.6008e-06	[5]	Group5	12.2302	17	[ACE2, EFG1, GAL4, HCM1, HMO1, MCM1, ROB1, SFL2, TCC1, TEC1, TEN1, TRY4, TRY5, UGA32, WOR2, WOR4, ZCF29]
GO:0003700	DNA-binding transcription factor activity	GO_BiologicalProcess-EBI-UniProt-GOA_25.11.2019_00h00	1.00874e-06	0.000104909	9.33467e-07	5.6008e-06	[6, 7, 8, 9, 10, 11]	Group5	13.3333	22	[ACE2, CPH1, EFG1, FCR3, GAL4, HAL9, HCM1, INO2, LYS144, MCM1, ROB1, SFL2, SUT1, TEC1, TRY4, TRY5, UGA32, WOR2, ZCF19, ZCF25, ZCF29, ZCF3]
GO:1900190	regulation of single-species biofilm formation	GO_BiologicalProcess-EBI-UniProt-GOA_25.11.2019_00h00	4.66731e-05	0.00438727	1.13708e-10	7.95953e-10	[3, 4, 5]	Group6	17.4603	11	[ACE2, CPH1, DEF1, EFG1, FCR3, RHB1, ROB1, TEC1, TPK1, TRY4, TRY5]
GO:0044011	single-species biofilm formation on inanimate substrate	GO_BiologicalProcess-EBI-UniProt-GOA_25.11.2019_00h00	1.97214e-07	2.07074e-05	1.13708e-10	7.95953e-10	[3, 6]	Group6	16.5217	19	[ALS3, CAT2, CLN3, CPH1, CSA1, DEF1, DSE1, EFG1, FCR3, HGC1, IFD6, PBR1, PGA10, RHB1, ROB1, TEC1, TPK1, TRY4, TRY5]
GO:0090609	single-species submerged biofilm formation	GO_BiologicalProcess-EBI-UniProt-GOA_25.11.2019_00h00	6.55055e-08	7.00909e-06	1.13708e-10	7.95953e-10	[5]	Group6	16.1538	21	[ACE2, ALS3, CAT2, CLN3, CPH1, CSA1, DEF1, DSE1, EFG1, FCR3, HGC1, HWP1, IFD6, PBR1, PGA10, RHB1, ROB1, TEC1, TPK1, TRY4, TRY5]
GO:1900430	positive regulation of filamentous growth of a population of unicellular organisms	GO_BiologicalProcess-EBI-UniProt-GOA_25.11.2019_00h00	3.56443e-06	0.000360007	1.13708e-10	7.95953e-10	[4, 5, 6]	Group6	17.7215	14	[ACE2, CLA4, CLN3, CPH1, DEF1, EFG1, HGC1, MCM1, ROB1, SLN1, SSK1, SSU81, TEC1, ZCF29]
GO:0043709	cell adhesion involved in single-species biofilm formation	GO_BiologicalProcess-EBI-UniProt-GOA_25.11.2019_00h00	0.000211992	0.0175953	1.13708e-10	7.95953e-10	[5, 6]	Group6	17.6471	9	[ACE2, ALS3, DEF1, DSE1, FCR3, HWP1, TPK1, TRY4, TRY5]
GO:0003700	DNA-binding transcription factor activity	GO_BiologicalProcess-EBI-UniProt-GOA_25.11.2019_00h00	1.00874e-06	0.000104909	1.13708e-10	7.95953e-10	[6, 7, 8, 9, 10, 11]	Group6	13.3333	22	[ACE2, CPH1, EFG1, FCR3, GAL4, HAL9, HCM1, INO2, LYS144, MCM1, ROB1, SFL2, SUT1, TEC1, TRY4, TRY5, UGA32, WOR2, ZCF19, ZCF25, ZCF29, ZCF3]
KEGG:04011	MAPK signaling pathway	KEGG_25.11.2019	1.02324e-07	1.08463e-05	6.91064e-12	6.21957e-11	[-1]	Group7	20.2532	16	[BEM2, CDC28, CEK2, CLA4, CPH1, MCM1, MIH1, MKK2, PTP2, SLN1, SPA2, SSK1, SSU81, SWI4, TEC1, WSC1]
GO:1900190	regulation of single-species biofilm formation	GO_BiologicalProcess-EBI-UniProt-GOA_25.11.2019_00h00	4.66731e-05	0.00438727	6.91064e-12	6.21957e-11	[3, 4, 5]	Group7	17.4603	11	[ACE2, CPH1, DEF1, EFG1, FCR3, RHB1, ROB1, TEC1, TPK1, TRY4, TRY5]
GO:1900428	regulation of filamentous growth of a population of unicellular organisms	GO_BiologicalProcess-EBI-UniProt-GOA_25.11.2019_00h00	1.92822e-08	2.08247e-06	6.91064e-12	6.21957e-11	[4, 5]	Group7	15.3846	24	[ACE2, CLA4, CLN3, CPH1, DEF1, EFG1, GAL10, HAL9, HAT1, HGC1, HST3, MCM1, ROB1, RTT109, SFL2, SLN1, SSK1, SSU81, TEC1, TPK1, TRX1, WOR2, ZCF29, ZCF3]
GO:1900429	negative regulation of filamentous growth of a population of unicellular organisms	GO_BiologicalProcess-EBI-UniProt-GOA_25.11.2019_00h00	8.50198e-05	0.00756676	6.91064e-12	6.21957e-11	[4, 5, 6]	Group7	17.8571	10	[CLN3, GAL10, HAL9, HAT1, HST3, RTT109, SFL2, TPK1, TRX1, WOR2]
GO:1900430	positive regulation of filamentous growth of a population of unicellular organisms	GO_BiologicalProcess-EBI-UniProt-GOA_25.11.2019_00h00	3.56443e-06	0.000360007	6.91064e-12	6.21957e-11	[4, 5, 6]	Group7	17.7215	14	[ACE2, CLA4, CLN3, CPH1, DEF1, EFG1, HGC1, MCM1, ROB1, SLN1, SSK1, SSU81, TEC1, ZCF29]
GO:1900445	positive regulation of filamentous growth of a population of unicellular organisms in response to biotic stimulus	GO_BiologicalProcess-EBI-UniProt-GOA_25.11.2019_00h00	7.3814e-06	0.00073814	6.91064e-12	6.21957e-11	[4, 5, 6, 7]	Group7	23.2558	10	[CLA4, CLN3, CPH1, EFG1, HGC1, ROB1, SLN1, SSK1, TEC1, ZCF29]
GO:0006812	cation transport	GO_BiologicalProcess-EBI-UniProt-GOA_25.11.2019_00h00	2.42719e-06	0.000247574	1.06638e-11	8.53105e-11	[5]	Group8	11.9403	24	[ALS3, ATX1, CCS1, CFL1, CFL2, COX17, CRP1, CTR1, DUR3, FRE10, FRE30, FRE7, FRP2, FTR2, HGT1, HGT14, HGT17, HGT7, HGT8, ITR1, NUP, PGA10, PTR22, UGA4]
GO:0022857	transmembrane transporter activity	GO_BiologicalProcess-EBI-UniProt-GOA_25.11.2019_00h00	1.48292e-06	0.000152741	1.06638e-11	8.53105e-11	[5]	Group8	9.80392	35	[AGP2, ATO1, ATO5, AVT4, CDR4, CRP1, CTR1, DUR3, DUR4, FRP3, FRP5, FRP6, FTR2, GPT1, HGT1, HGT14, HGT17, HGT20, HGT7, HGT8, HIP1, HOL1, ITR1, MDR1, NUP, OPT4, PET9, PTR22, QDR2, ROA1, SEO1, SFC1, SUL2, UGA4, YEA4]
GO:0000293	ferric-chelate reductase activity	GO_BiologicalProcess-EBI-UniProt-GOA_25.11.2019_00h00	5.93978e-05	0.00546459	1.06638e-11	8.53105e-11	[6]	Group8	33.3333	6	[CFL1, CFL2, FRE10, FRE30, FRE7, FRP2]
GO:0015075	ion transmembrane transporter activity	GO_BiologicalProcess-EBI-UniProt-GOA_25.11.2019_00h00	1.73641e-05	0.00170168	1.06638e-11	8.53105e-11	[6]	Group8	10.4167	25	[AGP2, ATO1, ATO5, AVT4, CRP1, CTR1, DUR3, FRP3, FRP5, FRP6, FTR2, GPT1, HGT1, HGT14, HGT17, HGT7, HGT8, HIP1, ITR1, NUP, PET9, PTR22, SUL2, UGA4, YEA4]
GO:0015318	inorganic molecular entity transmembrane transporter activity	GO_BiologicalProcess-EBI-UniProt-GOA_25.11.2019_00h00	4.48462e-05	0.00426039	1.06638e-11	8.53105e-11	[6]	Group8	10.3139	23	[AGP2, ATO1, ATO5, AVT4, CRP1, CTR1, FRP3, FRP5, FRP6, FTR2, GPT1, HGT1, HGT14, HGT17, HGT7, HGT8, HIP1, ITR1, MDR1, NUP, PTR22, SUL2, UGA4]
GO:0022804	active transmembrane transporter activity	GO_BiologicalProcess-EBI-UniProt-GOA_25.11.2019_00h00	0.000266701	0.0218695	1.06638e-11	8.53105e-11	[6]	Group8	12.1739	14	[CDR4, CRP1, HGT1, HGT14, HGT17, HGT7, HGT8, ITR1, NUP, PET9, PTR22, ROA1, SUL2, UGA4]
GO:0030001	metal ion transport	GO_BiologicalProcess-EBI-UniProt-GOA_25.11.2019_00h00	1.14965e-05	0.00113815	1.06638e-11	8.53105e-11	[6]	Group8	16.092	14	[ALS3, ATX1, CCS1, CFL1, CFL2, COX17, CRP1, CTR1, FRE10, FRE30, FRE7, FRP2, FTR2, PGA10]
GO:0030003	cellular cation homeostasis	GO_BiologicalProcess-EBI-UniProt-GOA_25.11.2019_00h00	9.83591e-05	0.0086556	1.06638e-11	8.53105e-11	[5, 7]	Group8	12.7119	15	[ALS3, ATX1, CFL1, CFL2, CRP1, CSA1, CTR1, FBP1, FRE10, FRE30, FRE7, FRP2, IRO1, PGA10, PTK2]
GO:0015749	monosaccharide transmembrane transport	GO_BiologicalProcess-EBI-UniProt-GOA_25.11.2019_00h00	6.60618e-05	0.00601163	1.06638e-11	8.53105e-11	[6, 7]	Group8	26.9231	7	[GAL1, HGT1, HGT14, HGT17, HGT7, HGT8, ITR1]
GO:0046942	carboxylic acid transport	GO_BiologicalProcess-EBI-UniProt-GOA_25.11.2019_00h00	0.000527193	0.0427026	1.06638e-11	8.53105e-11	[6, 7]	Group8	13.4146	11	[AGP2, ATO1, ATO5, AVT4, FRP3, FRP5, FRP6, GPT1, HIP1, SFC1, UGA4]
GO:0008514	organic anion transmembrane transporter activity	GO_BiologicalProcess-EBI-UniProt-GOA_25.11.2019_00h00	0.000161327	0.0137128	1.06638e-11	8.53105e-11	[6, 7, 8]	Group8	14.2857	12	[AGP2, ATO1, ATO5, AVT4, FRP3, FRP5, FRP6, GPT1, HIP1, PET9, UGA4, YEA4]
